# Supplementary material for: Metal–Ligand Cooperativity of the Calix[4]pyrrolato Aluminate: Triggerable C−C Bond Formation and Rate Control in Catalysis
Source: PubMed Central journal article supplement — Angew Chem Int Ed Engl. 2020 Aug 18;59(39):17118–24. doi: 10.1002/anie.202007717 (PMC7540271; doi:10.1002/anie.202007717), 2020-08-18
Supplement: ANIE-59-17118-s001.pdf [file ANIE-59-17118-s001.pdf]

## Supporting Information

### **Metal–Ligand Cooperativity of the Calix[4]pyrrolato Aluminate: Triggerable C–C Bond Formation and Rate Control in Catalysis**

*Fabian Ebner, Lukas Maximilian Sigmund, and Lutz Greb\**

anie\_202007717\_sm\_miscellaneous\_information.pdf

## Table of Contents

|                                                                                                   |     |
|---------------------------------------------------------------------------------------------------|-----|
| 1. Materials and Methods .....                                                                    | 2   |
| 2. Synthesis .....                                                                                | 3   |
| 3. $^{13}\text{CO}_2$ labeling experiments .....                                                  | 8   |
| 4. Variable temperature $^1\text{H}$ NMR measurements of $[\text{PPh}_4][1\text{-acetone}]$ ..... | 10  |
| 5. Dynamics and different Isomers of $[1\text{-}p\text{DMA-BA}][\text{PPh}_4]$ .....              | 11  |
| 6. Exchange of $[\text{PPh}_4][1^*\text{-CyA}]$ monitored by 2D EXSY NMR spectroscopy .....       | 14  |
| 7. Influence of $\text{Li}^+$ on the addition mode .....                                          | 18  |
| 7.1. Influence on the coordination mode .....                                                     | 18  |
| 7.2. Reversibility of coordination mode .....                                                     | 22  |
| 8. Substrate exchange experiments .....                                                           | 23  |
| 9. Hydroboration kinetics .....                                                                   | 34  |
| 10. X-ray diffraction structures .....                                                            | 48  |
| 11. NMR spectra of all new compounds .....                                                        | 53  |
| 12. Computational details .....                                                                   | 72  |
| 12.1. Geometry optimization and single point calculations .....                                   | 72  |
| 12.2. Overview of different coordination modes and isomers: computation and spectroscopy .....    | 73  |
| 13. X-ray Crystal Structure Determinations .....                                                  | 80  |
| 14. Appendix .....                                                                                | 84  |
| References .....                                                                                  | 114 |

## 1. Materials and Methods

Unless otherwise stated, all manipulations were carried out under a dry argon atmosphere by using standard Schlenk techniques to prevent oxidation and hydrolysis of sensitive compounds. All solvents were rigorously dried by applying standard procedures, freshly degassed and stored over molecular sieve (3 Å resp. 4 Å) before use. All glassware, syringes, magnetic stirring bars, and needles were thoroughly dried. The commercially available chemicals were used as received. Lithium aluminum hydride was purified by dissolving in dry ether followed by filtration and evaporation of the solvent. All air-sensitive compounds were stored in a glove box (MBraun LABmaster dp, MB-20-G or Sylatech Glovebox) under N<sub>2</sub> atmosphere. The purity and identity of the compounds were confirmed by high-resolution multinuclear NMR spectroscopy, mass spectrometry, and if possible, X-ray diffraction analysis. <sup>1</sup>H, <sup>7</sup>Li, and <sup>13</sup>C{<sup>1</sup>H} NMR spectra were collected with a Bruker DPX 200, Bruker Advance II 400 or Bruker 2 Advance III 600 NMR spectrometer and referenced to the solvent in use. Chemical shifts are reported as dimensionless  $\delta$  values in ppm, coupling constants *J* are given in hertz (Hz). Electrospray ionization mass spectra were obtained with a Bruker ApexQe FT-ICR instrument. IR-Spectra was recorded on a BIORAD Excalibur FTS 3000 Spectrometer and processed with BioRad Merlin and OriginPro 2017G 64Bit. All KBr pellets were prepared under a nitrogen atmosphere in a glovebox and measured immediately after exposure to air. *meso*-Octamethylcalix[4]pyrrole (CX) was prepared from acetone and pyrrole according to the literature and purified via flash column chromatography.<sup>1</sup>

## 2. Synthesis

### Synthesis of [Li(thf)<sub>4</sub>][1\*-CO<sub>2</sub>]:

A solution of [Li(thf)<sub>4</sub>][1-thf] (100 mg, 122 μmol) in tetrahydrofuran was subjected toward carbon dioxide (2 bar) and quantitative conversion was observed after 12 h at room temperature. The analog reaction in dichloromethane as solvent showed full conversion in minutes after addition of carbon dioxide, as detected by <sup>1</sup>H NMR spectroscopy. All volatiles were removed under reduced pressure and a yellow solid was obtained. Yield: 97% (93 mg, 117 μmol). <sup>1</sup>H NMR (THF-*d*<sub>8</sub>, 400 MHz, 295 K) δ[ppm]: 7.69 (d, <sup>3</sup>J<sub>HH</sub> = 5.0 Hz, 1H, *H*<sub>2</sub>), 6.86 (d, <sup>3</sup>J<sub>HH</sub> = 5.0 Hz, 1H, *H*<sub>3</sub>), 5.82 (d, <sup>3</sup>J<sub>HH</sub> = 3.1 Hz, 1H, *H*<sub>pyrrole</sub>), 5.76 (d, <sup>3</sup>J<sub>HH</sub> = 3.1 Hz, 1H, *H*<sub>pyrrole</sub>), 5.73 (d, <sup>3</sup>J<sub>HH</sub> = 3.1 Hz, 1H, *H*<sub>pyrrole</sub>), 5.68 (m, 3H, *H*<sub>pyrrole</sub>), 3.61 (m, 16H, *H*<sub>THF1</sub>), 1.77 (m, 16H, *H*<sub>THF1</sub>), 1.75 (s, 3H, *H*<sub>CH3</sub>), 1.74 (s, 3H, *H*<sub>CH3</sub>), 1.71 (s, 3H, *H*<sub>CH3</sub>), 1.62 (s, 3H, *H*<sub>CH3</sub>), 1.60 (s, 3H, *H*<sub>CH3</sub>), 1.38 (s, 3H, *H*<sub>CH3</sub>), 1.33 (s, 3H, *H*<sub>CH3</sub>), 0.92 (s, 3H, *H*<sub>CH3</sub>). <sup>13</sup>C{<sup>1</sup>H} NMR (THF-*d*<sub>8</sub>, 100 MHz, 295 K) δ[ppm]: 188.3 (*C*<sub>4</sub>), 173.1 (*C*<sub>CO2/C5</sub>), 156.7 (*C*<sub>2</sub>), 150.9 (*C*<sub>q,pyrrole</sub>), 149.8 (*C*<sub>q,pyrrole</sub>), 147.0 (*C*<sub>q,pyrrole</sub>), 146.7 (*C*<sub>q,pyrrole</sub>), 144.7 (*C*<sub>q,pyrrole</sub>), 140.3 (*C*<sub>q,pyrrole</sub>), 128.5 (*C*<sub>3</sub>), 104.1 (*C*<sub>CH,pyrrole</sub>), 103.4 (*C*<sub>CH,pyrrole</sub>), 102.2 (*C*<sub>CH,pyrrole</sub>), 101.8 (*C*<sub>CH,pyrrole</sub>), 101.5 (*C*<sub>CH,pyrrole</sub>), 100.8 (*C*<sub>CH,pyrrole</sub>), 97.3 (*C*<sub>1</sub>), 68.0 (*C*<sub>THF</sub>), 44.9 (*C*<sub>q</sub>), 40.9 (*C*<sub>CH3</sub>), 39.2 (*C*<sub>q</sub>), 36.8 (*C*<sub>CH3</sub>), 36.7 (*C*<sub>q</sub>), 36.7 (*C*<sub>q</sub>), 36.6 (*C*<sub>CH3</sub>), 28.4 (*C*<sub>CH3</sub>), 27.4 (*C*<sub>CH3</sub>), 27.3 (*C*<sub>CH3</sub>), 26.7 (*C*<sub>CH3</sub>), 24.0 (*C*<sub>CH3</sub>). <sup>7</sup>Li NMR (THF-*d*<sub>8</sub>, 155 MHz, 295 K) δ[ppm]: -0.5. [HR-ESI]<sup>+</sup>: calc: 495.2340 m/z ([1\*-CO<sub>2</sub>)<sup>+</sup>] exp. 495.2332 m/z ([1\*-CO<sub>2</sub>)<sup>+</sup>]. IR (KBr): C=O band at  $\tilde{\nu}$  = 1665 cm<sup>-1</sup>.

### Synthesis of [PPh<sub>4</sub>][1\*-CO<sub>2</sub>]:

A solution of [PPh<sub>4</sub>][1] (100 mg, 126 μmol, 1.00 eq.) in 3 ml dichloromethane was subjected toward carbon dioxide (2 bar) and quantitative conversion was observed immediately at room temperature by <sup>1</sup>H NMR spectroscopy. All volatiles were removed under reduced pressure and a yellow solid was obtained. The CO<sub>2</sub> adduct is persistent at room temperature, and no CO<sub>2</sub> release is observed upon heating under vacuum. Suitable crystals for SCXRD were obtained from a 1:1 mixture of dichloromethane/toluene at room temperature. <sup>1</sup>H NMR (DCM-*d*<sub>2</sub>, 600 MHz, 295 K) δ[ppm]: 7.84 (m, 4H, *PPh*<sub>4</sub><sup>+</sup>), 7.67-7.65 (m, 8H, *PPh*<sub>4</sub><sup>+</sup>), 7.65 (d, <sup>3</sup>J<sub>HH</sub> = 5.0 Hz, 1H, *H*<sub>2</sub>), 7.56-7.54 (m, 8H, *PPh*<sub>4</sub><sup>+</sup>), 6.68 (d, <sup>3</sup>J<sub>HH</sub> = 5.0 Hz, 1H, *H*<sub>3</sub>), 5.90 (d, <sup>3</sup>J<sub>HH</sub> = 2.8 Hz, 1H, *H*<sub>pyrrole</sub>), 5.86 (d, <sup>3</sup>J<sub>HH</sub> = 2.9 Hz, 2H, *H*<sub>pyrrole</sub>), 5.81 (d, <sup>3</sup>J<sub>HH</sub> = 2.9 Hz, 2H, *H*<sub>pyrrole</sub>), 5.77 (d, <sup>3</sup>J<sub>HH</sub> = 2.9 Hz, 1H, *H*<sub>pyrrole</sub>), 5.75 (d, <sup>3</sup>J<sub>HH</sub> = 2.9 Hz, 1H, *H*<sub>pyrrole</sub>), 5.73 (d, <sup>3</sup>J<sub>HH</sub> = 2.9 Hz, 1H, *H*<sub>pyrrole</sub>), 1.75 (s, 3H, *H*<sub>CH3</sub>), 1.75 (s, 3H, *H*<sub>CH3</sub>), 1.68 (s, 3H, *H*<sub>CH3</sub>), 1.64 (s, 3H, *H*<sub>CH3</sub>), 1.58 (s, 3H, *H*<sub>CH3</sub>), 1.40 (s, 3H, *H*<sub>CH3</sub>), 1.36 (s, 3H, *H*<sub>CH3</sub>), 0.92 (s, 3H, *H*<sub>CH3</sub>). <sup>13</sup>C{<sup>1</sup>H} NMR (DCM-*d*<sub>2</sub>, 150 MHz, 295 K) δ[ppm]: 186.9 (*C*<sub>q</sub> *C*<sub>4</sub>, identified by <sup>1</sup>H/<sup>13</sup>C{<sup>1</sup>H} HMBC NMR), 166.87 (*C*<sub>CO2/C5</sub>), 158.1 (*C*<sub>2</sub>), 150.4 (*C*<sub>q,pyrrole</sub>), 148.7 (*C*<sub>q,pyrrole</sub>), 147.5 (*C*<sub>q,pyrrole</sub>), 146.9 (*C*<sub>q,pyrrole</sub>), 146.3 (*C*<sub>q,pyrrole</sub>), 141.7 (*C*<sub>q,pyrrole</sub>), 136.2 (d, <sup>4</sup>J<sub>CP</sub> = 3.1 Hz, CH, *PPh*<sub>4</sub><sup>+</sup>), 134.8 (d, <sup>2</sup>J<sub>CP</sub> = 10.3 Hz, CH, *PPh*<sub>4</sub><sup>+</sup>), 131.0 (d, <sup>3</sup>J<sub>CP</sub> = 12.9 Hz, CH, *PPh*<sub>4</sub><sup>+</sup>), 127.1 (CH, *C*<sub>3</sub>), 117.9 (d, <sup>1</sup>J<sub>CP</sub> = 89.8 Hz, *C*<sub>q</sub>, *PPh*<sub>4</sub><sup>+</sup>), 103.7 (*C*<sub>CH,pyrrole</sub>), 102.6 (*C*<sub>CH,pyrrole</sub>), 102.0 (*C*<sub>CH,pyrrole</sub>), 101.8 (*C*<sub>CH,pyrrole</sub>), 101.5 (*C*<sub>CH,pyrrole</sub>), 100.2 (*C*<sub>CH,pyrrole</sub>), 97.9 (*C*<sub>1</sub>), 44.3 (*C*<sub>q</sub>), 41.5 (*C*<sub>CH3</sub>), 38.8 (*C*<sub>q</sub>), 36.5 (*C*<sub>CH3</sub>), 36.4 (*C*<sub>q</sub>), 36.3 (*C*<sub>q</sub>), 35.4 (*C*<sub>CH3</sub>), 28.1 (*C*<sub>CH3</sub>), 27.7 (*C*<sub>CH3</sub>), 27.3 (*C*<sub>CH3</sub>), 26.4 (*C*<sub>CH3</sub>), 24.0 (*C*<sub>CH3</sub>). <sup>31</sup>P NMR (DCM-*d*<sub>2</sub>, 243 MHz, 295 K) δ[ppm]: 23.18.

### Synthesis of [PPh<sub>4</sub>][1\*-cyclohexanecarboxaldehyde]:

To a solution of [PPh<sub>4</sub>][1] (100 mg, 126 μmol, 1.00 eq.) in 3 ml dichloromethane cyclohexanecarboxaldehyde (16.9 mg, 151 μmol, 1.20 eq.) was added and stirred for 5 min. Full conversion was detected by <sup>1</sup>H NMR spectroscopy. 4 ml *n*-pentane was added to the solution, the solution cooled to -40 °C for 30 min and the yellowish solid was separated by filtration from the solution. The solid was again dissolved in 3 ml dichloromethane and precipitated again with 4 ml *n*-pentane, separated by filtration and dried *in vacuo* to obtain [PPh<sub>4</sub>][1\*-cyclohexanecarboxaldehyde] as yellow solid. Suitable crystals for SCXRD were obtained from a 1:1 mixture of dichloromethane/toluene at room temperature. <sup>1</sup>H NMR (DCM-*d*<sub>2</sub>, 400 MHz, 295 K) δ[ppm]: 7.87 (m, 4H, *PPh*<sub>4</sub><sup>+</sup>), 7.72-7.68 (m, 8H, *PPh*<sub>4</sub><sup>+</sup>), 7.64 (d, <sup>3</sup>J<sub>HH</sub> = 5.0 Hz, 1H, *H*<sub>2</sub>), 7.59-7.56 (m, 8H, *PPh*<sub>4</sub><sup>+</sup>), 6.63 (d, <sup>3</sup>J<sub>HH</sub> = 5.0 Hz, 1H, *H*<sub>3</sub>), 5.89 (d, <sup>3</sup>J<sub>HH</sub> = 2.8 Hz, 1H, *H*<sub>pyrrole</sub>), 5.78 (d, <sup>3</sup>J<sub>HH</sub> = 2.9 Hz, 2H, *H*<sub>pyrrole</sub>), 5.77 (d, <sup>3</sup>J<sub>HH</sub> = 2.9 Hz, 2H, *H*<sub>pyrrole</sub>), 5.69 (d, <sup>3</sup>J<sub>HH</sub> = 2.9 Hz, 1H, *H*<sub>pyrrole</sub>), 5.67 (d, <sup>3</sup>J<sub>HH</sub> = 2.9 Hz, 1H, *H*<sub>pyrrole</sub>), 5.64 (d, <sup>3</sup>J<sub>HH</sub> = 2.9 Hz, 1H, *H*<sub>pyrrole</sub>), 4.14 (d, <sup>3</sup>J<sub>HH</sub> = 4.2 Hz, 1H,

*H*<sub>Aldehyde</sub>), 1.72 (s, 3H, *H*<sub>CH3</sub>), 1.62 (s, 3H, *H*<sub>CH3</sub>), 1.61 (s, 9H, *H*<sub>CH3</sub>), 1.56 (s, 3H, *H*<sub>CH3</sub>), 1.54 (m, 1H, *H*<sub>Cyhex</sub>), 1.48 (m, 1H, *H*<sub>Cyhex</sub>), 1.41 (m, 1H, *H*<sub>Cyhex</sub>), 1.36 (m, 1H, *H*<sub>Cyhex</sub>), 1.29 (m, 1H, *H*<sub>Cyhex</sub>), 1.26 (m, 1H, *H*<sub>Cyhex</sub>), 1.17 (m, 1H, *H*<sub>Cyhex</sub>), 1.10 (m, 1H, *H*<sub>Cyhex</sub>), 1.02 (m, 1H, *H*<sub>Cyhex</sub>), 0.78 (s, 3H, *H*<sub>CH3</sub>), 0.71 (m, 1H, *H*<sub>Cyhex</sub>). <sup>13</sup>C{<sup>1</sup>H} NMR (DCM-*d*<sub>2</sub>, 100 MHz, 295 K) δ[ppm]: 183.4 (C<sub>q</sub> C4, identified by <sup>1</sup>H/<sup>13</sup>C{<sup>1</sup>H} HMBC NMR), 160.3 (CH, C2), 150.2 (C<sub>q</sub>, C<sub>pyrrole</sub>), 148.7 (C<sub>q</sub>, C<sub>pyrrole</sub>), 147.4 (C<sub>q</sub>, C<sub>pyrrole</sub>), 147.0 (C<sub>q</sub>, C6), 141.7 (C<sub>q</sub>, C<sub>pyrrole</sub>), 136.2 (d, <sup>4</sup>J<sub>CP</sub> = 3.1 Hz, CH, *PPh*<sub>4</sub><sup>+</sup>), 134.8 (d, <sup>2</sup>J<sub>CP</sub> = 10.3 Hz, CH, *PPh*<sub>4</sub><sup>+</sup>), 131.0 (d, <sup>3</sup>J<sub>CP</sub> = 12.9 Hz, CH, *PPh*<sub>4</sub><sup>+</sup>), 126.9 (CH, C3), 117.9 (d, <sup>1</sup>J<sub>CP</sub> = 89.8 Hz, C<sub>q</sub>, *PPh*<sub>4</sub><sup>+</sup>), 103.0 (CH, C<sub>pyrrole</sub>), 101.0 (CH, C<sub>pyrrole</sub>), 100.8 (CH, C<sub>pyrrole</sub>), 100.7 (CH, C<sub>pyrrole</sub>), 100.4 (CH, C<sub>pyrrole</sub>), 98.9 (CH, C<sub>pyrrole</sub>), 96.8 (C<sub>q</sub>, C1), 81.3 (CH, C5), 46.8 (C<sub>CH3</sub>), 44.8 (C<sub>q</sub>), 41.5 (C<sub>CH3</sub>), 38.7 (C<sub>q</sub>), 36.6 (C<sub>q</sub>), 36.5 (C<sub>CH3</sub>), 36.5 (C<sub>q</sub>), 35.8 (C<sub>CH3</sub>), 34.5 (C<sub>q</sub>), 32.5 (C<sub>CH2</sub>), 28.2 (C<sub>CH3</sub>), 27.8 (C<sub>CH3</sub>), 27.4 (C<sub>CH2</sub>), 27.3 (C<sub>CH3</sub>), 27.2 (C<sub>CH2</sub>), 26.9 (C<sub>CH2</sub>), 26.7 (C<sub>CH3</sub>), 26.1 (C<sub>CH2</sub>), 24.3 (C<sub>CH3</sub>). <sup>31</sup>P NMR (DCM-*d*<sub>2</sub>, 243 MHz, 295 K) δ[ppm]: 23.24.

#### Synthesis of [PPh<sub>4</sub>][1\*-*p*-nitrobenzaldehyde]:

To a solution of [PPh<sub>4</sub>][1] (100 mg, 126 μmol, 1.00 eq.) in 3 ml dichloromethane *p*-nitrobenzaldehyde (22.8 mg, 151 μmol, 1.20 eq.) was added and stirred for 5 min. Full conversion was detected *via* <sup>1</sup>H NMR spectroscopy. 4 ml *n*-pentane were added to the solution and the reddish solid was separated by filtration from the solution. The solid was again dissolved in 2 ml dichloromethane and precipitated again with 4 ml *n*-pentane, separated by filtration and dried *in vacuo* to obtain [PPh<sub>4</sub>][1\*-*p*-nitrobenzaldehyde] as red solid. Suitable crystals for SCXRD were obtained from dichloromethane at room temperature. <sup>1</sup>H NMR (DCM-*d*<sub>2</sub>, 600 MHz, 295 K) δ[ppm]: 7.90-7.86 (m, 4H, *PPh*<sub>4</sub><sup>+</sup>), 7.75 (d, <sup>3</sup>J<sub>HH</sub> = 8.6 Hz, 2H, *H*<sub>8</sub>), 7.73-7.68 (m, 8H, *PPh*<sub>4</sub><sup>+</sup>), 7.60-7.54 (m, 8H, *PPh*<sub>4</sub><sup>+</sup>), 6.91 (d, <sup>3</sup>J<sub>HH</sub> = 5.2 Hz, 1H, *H*<sub>2</sub>), 6.74 (d, <sup>3</sup>J<sub>HH</sub> = 8.6 Hz, 2H, *H*<sub>7</sub>), 6.06 (d, <sup>3</sup>J<sub>HH</sub> = 5.1 Hz, 1H, *H*<sub>3</sub>), 6.01 (d, <sup>3</sup>J<sub>HH</sub> = 2.9 Hz, 1H, *H*<sub>pyrrole</sub>), 5.92 (d, <sup>3</sup>J<sub>HH</sub> = 2.9 Hz, 1H, *H*<sub>pyrrole</sub>), 5.85 (d, <sup>3</sup>J<sub>HH</sub> = 3.1 Hz, 1H, *H*<sub>pyrrole</sub>), 5.84 (d, <sup>3</sup>J<sub>HH</sub> = 3.1 Hz, 1H, *H*<sub>pyrrole</sub>), 5.73 (d, <sup>3</sup>J<sub>HH</sub> = 2.8 Hz, 1H, *H*<sub>pyrrole</sub>), 5.70 (d, <sup>3</sup>J<sub>HH</sub> = 2.8 Hz, 1H, *H*<sub>pyrrole</sub>), 5.62 (s, 1H, *H*<sub>5</sub>), 1.87 (s, 3H, *H*<sub>CH3</sub>), 1.68 (s, 3H, *H*<sub>CH3</sub>), 1.67 (s, 3H, *H*<sub>CH3</sub>), 1.62 (s, 3H, *H*<sub>CH3</sub>), 1.62 (s, 3H, *H*<sub>CH3</sub>), 1.54 (s, 3H, *H*<sub>CH3</sub>), 1.40 (s, 3H, *H*<sub>CH3</sub>), 0.87 (s, 3H, *H*<sub>CH3</sub>). <sup>13</sup>C{<sup>1</sup>H} NMR (DCM-*d*<sub>2</sub>, 150 MHz, 295 K) δ[ppm]: 187.6 (C<sub>q</sub> C4, identified by <sup>1</sup>H/<sup>13</sup>C{<sup>1</sup>H} HMBC NMR), 160.7 (CH, C2), 150.8 (C<sub>q</sub>, C<sub>pyrrole</sub>), 148.9 (C<sub>q</sub>, C<sub>pyrrole</sub>), 147.1 (C<sub>q</sub>, C<sub>pyrrole</sub>), 146.8 (C<sub>q</sub>, C<sub>pyrrole</sub>), 146.47 (C<sub>q</sub>, C6), 146.4 (C<sub>q</sub>, C<sub>pyrrole</sub>), 141.6 (C<sub>q</sub>, C<sub>pyrrole</sub>), 136.2 (d, <sup>4</sup>J<sub>CP</sub> = 3.1 Hz, CH, *PPh*<sub>4</sub><sup>+</sup>), 134.8 (d, <sup>2</sup>J<sub>CP</sub> = 10.3 Hz, CH, *PPh*<sub>4</sub><sup>+</sup>), 131.0 (d, <sup>3</sup>J<sub>CP</sub> = 12.9 Hz, CH, *PPh*<sub>4</sub><sup>+</sup>), 127.2 (CH, C7), 124.9 (CH, C3), 123.1 (CH, C8), 117.9 (d, <sup>1</sup>J<sub>CP</sub> = 89.8 Hz, C<sub>q</sub>, *PPh*<sub>4</sub><sup>+</sup>), 103.3 (CH, C<sub>pyrrole</sub>), 102.6 (CH, C<sub>pyrrole</sub>), 101.3 (CH, C<sub>pyrrole</sub>), 101.1 (CH, C<sub>pyrrole</sub>), 100.9 (CH, C<sub>pyrrole</sub>), 99.1 (CH, C<sub>pyrrole</sub>), 96.2 (C<sub>q</sub>, C1), 77.9 (CH, C5), 42.9 (C<sub>q</sub>), 41.0 (C<sub>q</sub>), 38.8 (C<sub>q</sub>), 36.7 (C<sub>q</sub>), 36.6 (C<sub>CH3</sub>), 36.1 (C<sub>CH3</sub>), 35.8 (C<sub>CH3</sub>), 29.5 (C<sub>CH3</sub>), 28.5 (C<sub>CH3</sub>), 27.1 (C<sub>CH3</sub>), 26.6 (C<sub>CH3</sub>), 24.1 (C<sub>CH3</sub>). <sup>31</sup>P NMR (DCM-*d*<sub>2</sub>, 243 MHz, 295 K) δ[ppm]: 23.25.

#### Synthesis of [PPh<sub>4</sub>][1\*-*p*-methylbenzaldehyde]:

To a solution of [PPh<sub>4</sub>][1] (100 mg, 122 μmol, 1.00 eq.) in 3 ml dichloromethane *p*-methylbenzaldehyde (18.1 mg, 151 μmol, 1.20 eq.) was added and stirred for 5 min. Full conversion was proved by <sup>1</sup>H NMR spectroscopy. Crystallization started immediately at rt and after 24 h at rt the crystals were separated by filtration to obtain [PPh<sub>4</sub>][1\*-*p*-methylbenzaldehyde] as yellow crystals. These were also suitable for SCXRD. For obtaining the product, the reaction mixture can be immediately treated after mixing with 6 ml *n*-pentane. The solid was separated by filtration and washed three times with 6 ml *n*-pentane. <sup>1</sup>H NMR (DCM-*d*<sub>2</sub>, 600 MHz, 295 K) δ[ppm]: 7.85 (m, 4H, *PPh*<sub>4</sub><sup>+</sup>), 7.67 (m, 8H, *PPh*<sub>4</sub><sup>+</sup>), 7.56-7.54 (m, 8H, *PPh*<sub>4</sub><sup>+</sup>), 6.94 (d, <sup>3</sup>J<sub>HH</sub> = 5.2 Hz, 1H, *H*<sub>2</sub>), 6.72 (d, <sup>3</sup>J<sub>HH</sub> = 7.7 Hz, 2H, *H*<sub>7</sub>), 6.06 (d, <sup>3</sup>J<sub>HH</sub> = 7.7 Hz, 1H, *H*<sub>3</sub>), 6.08 (d, <sup>3</sup>J<sub>HH</sub> = 5.2 Hz, 1H, *H*<sub>pyrrole</sub>), 5.98 (d, <sup>3</sup>J<sub>HH</sub> = 2.9 Hz, 1H, *H*<sub>pyrrole</sub>), 5.87 (d, <sup>3</sup>J<sub>HH</sub> = 3.1 Hz, 1H, *H*<sub>pyrrole</sub>), 5.82 (d, <sup>3</sup>J<sub>HH</sub> = 3.1 Hz, 1H, *H*<sub>pyrrole</sub>), 5.79 (d, <sup>3</sup>J<sub>HH</sub> = 2.8 Hz, 1H, *H*<sub>pyrrole</sub>), 5.69 (d, <sup>3</sup>J<sub>HH</sub> = 2.8 Hz, 1H, *H*<sub>pyrrole</sub>), 5.66 (d, <sup>3</sup>J<sub>HH</sub> = 2.8 Hz, 1H, *H*<sub>pyrrole</sub>), 5.44 (s, 1H, *H*<sub>Aldehyde</sub>), 2.14 (s, 3H, *H*<sub>AldehydeCH3</sub>), 1.84 (s, 3H, *H*<sub>CH3</sub>), 1.66 (s, 3H, *H*<sub>CH3</sub>), 1.64 (s, 3H, *H*<sub>CH3</sub>), 1.63 (s, 3H, *H*<sub>CH3</sub>), 1.59 (s, 3H, *H*<sub>CH3</sub>), 1.54 (s, 3H, *H*<sub>CH3</sub>), 1.37 (s, 3H, *H*<sub>CH3</sub>),

0.86 (s, 3H,  $H_{CH_3}$ ).  $^{13}C\{^1H\}$  NMR (DCM- $d_2$ , 150 MHz, 295 K)  $\delta$ [ppm]: 186.6 ( $C_q$  C4, identified by  $^1H/^{13}C\{^1H\}$  HMBC NMR), 161.6 (CH, C2), 150.6 ( $C_q$ ,  $C_{pyrrole}$ ), 148.7 ( $C_q$ ,  $C_{pyrrole}$ ), 147.6 ( $C_q$ ,  $C_{pyrrole}$ ), 147.5 ( $C_q$ ,  $C_{pyrrole}$ ), 146.9 ( $C_q$ ,  $C_{pyrrole}$ ), 145.5 ( $C_q$ , C6), 141.8 ( $C_q$ ,  $C_{pyrrole}$ ), 136.2 (d,  $^4J_{CP}$  = 3.1 Hz, CH,  $PPh_4^+$ ), 135.1 ( $C_q$ , C9), 134.8 (d,  $^2J_{CP}$  = 10.3 Hz, CH,  $PPh_4^+$ ), 131.0 (d,  $^3J_{CP}$  = 12.9 Hz, CH,  $PPh_4^+$ ), 128.2 (CH, C7), 126.1 (CH, C3), 124.1 (CH, C8), 117.9 (d,  $^1J_{CP}$  = 89.8 Hz,  $C_q$ ,  $PPh_4^+$ ), 103.0 (CH,  $C_{pyrrole}$ ), 101.8 (CH,  $C_{pyrrole}$ ), 101.1 (CH,  $C_{pyrrole}$ ), 100.9 (CH,  $C_{pyrrole}$ ), 100.5 (CH,  $C_{pyrrole}$ ), 98.9 (CH,  $C_{pyrrole}$ ), 96.9 ( $C_q$ , C1), 78.1 (CH, C5), 42.9 ( $C_q$ ), 41.2 ( $C_q$ ), 38.7 ( $C_q$ ), 36.6 ( $C_q$ ), 36.6 ( $C_{CH_3}$ ), 36.1 ( $C_{CH_3}$ ), 36.0 ( $C_{CH_3}$ ), 29.4 ( $C_{CH_3}$ ), 28.4 ( $C_{CH_3}$ ), 27.2 ( $C_{CH_3}$ ), 26.7 ( $C_{CH_3}$ ), 24.2 ( $C_{CH_3}$ ), 21.0 ( $C_{PhenylCH_3}$ ).  $^{31}P$  NMR (DCM- $d_2$ , 243 MHz, 295 K)  $\delta$ [ppm]: 23.23.

#### Synthesis of $[PPh_4][1^*/1\text{-}p\text{-dimethylaminobenzaldehyde}]$ :

To a solution of  $[PPh_4][1]$  (100 mg, 122  $\mu$ mol, 1.00 eq.) in 3 ml dichloromethane *p*-dimethylaminobenzaldehyde (18.2 mg, 122  $\mu$ mol, 1.00 eq.) was added and stirred for 5 min. Full conversion was monitored *via*  $^1H$  NMR spectroscopy. 4 ml *n*-pentane were added to the solution and the brownish solid was separated by filtration from the solution and dried *in vacuo*.  $[PPh_4][1^*/1\text{-}p\text{-dimethylaminobenzaldehyde}]$  was isolated as a light brownish solid. Suitable crystals for SCXRD were obtained from dichloromethane at -40 °C.  $^1H$  NMR spectroscopy revealed a highly dynamic mixture, which will be discussed in detail in section 5.

#### Synthesis of $[1^*\text{-}p\text{-dimethylaminobenzaldehyde}][Li(thf)_4]$ :

To a solution of  $[Li(thf)_4][1\text{-}thf]$  (100 mg, 122  $\mu$ mol, 1.00 eq.) in 3 ml dichloromethane *p*-dimethylaminobenzaldehyde (18.2 mg, 122  $\mu$ mol, 1.00 eq.) was added and stirred for 5 min. 4 ml *n*-pentane was added to the solution and the yellow solid was separated by filtration from the solution. The solid was dried after reduced pressure to obtain  $[Li(thf)_4][1^*\text{-}p\text{-dimethylaminobenzaldehyde}]$  as light yellow solid.  $^1H$  NMR (DCM- $d_2$ , 600 MHz, 295 K)  $\delta$ [ppm]: 7.07 (d,  $^3J_{HH}$  = 5.2 Hz, 1H,  $H_2$ ), 6.33 (d,  $^3J_{HH}$  = 8.5 Hz, 2H,  $H_7$ ), 6.32 (d,  $^3J_{HH}$  = 5.2 Hz, 1H,  $H_3$ ), 6.27 (d,  $^3J_{HH}$  = 8.5 Hz, 1H,  $H_3$ ), 6.26 (d,  $^3J_{HH}$  = 2.9 Hz, 1H,  $H_{pyrrole}$ ), 6.03 (d,  $^3J_{HH}$  = 2.9 Hz, 1H,  $H_{pyrrole}$ ), 6.01 (d,  $^3J_{HH}$  = 3.1 Hz, 1H,  $H_{pyrrole}$ ), 5.90 (d,  $^3J_{HH}$  = 3.1 Hz, 1H,  $H_{pyrrole}$ ), 5.83 (d,  $^3J_{HH}$  = 2.8 Hz, 1H,  $H_{pyrrole}$ ), 5.80 (d,  $^3J_{HH}$  = 2.8 Hz, 1H,  $H_{pyrrole}$ ), 5.17 (s, 1H,  $H_{aldehyde}$ ), 3.57 (m, 16H,  $H_{thf}$ ), 2.79 (s, 6H,  $H_{aldehydeCH_3}$ ), 1.84 (s, 3H,  $H_{CH_3}$ ), 1.77 (m, 16H,  $H_{thf}$ ), 1.76 (s, 3H,  $H_{CH_3}$ ), 1.71 (s, 3H,  $H_{CH_3}$ ), 1.70 (s, 3H,  $H_{CH_3}$ ), 1.65 (s, 3H,  $H_{CH_3}$ ), 1.47 (s, 3H,  $H_{CH_3}$ ), 1.43 (s, 3H,  $H_{CH_3}$ ), 0.91 (s, 3H,  $H_{CH_3}$ ).  $^{13}C\{^1H\}$  NMR (DCM- $d_2$ , 150 MHz, 295 K)  $\delta$ [ppm]: 190.1 ( $C_q$  C4, identified by  $^1H/^{13}C\{^1H\}$  HMBC NMR), 160.4 (CH, C2), 153.0 ( $C_q$ ,  $C_{pyrrole}$ ), 150.4 ( $C_q$ ,  $C_{pyrrole}$ ), 149.9 ( $C_q$ ,  $C_{pyrrole}$ ), 147.5 ( $C_q$ ,  $C_{pyrrole}$ ), 147.3 ( $C_q$ ,  $C_{pyrrole}$ ), 147.1 ( $C_q$ ,  $C_{pyrrole}$ ), 141.1 ( $C_q$ ,  $C_{pyrrole}$ ), 131.4 ( $C_q$ ,  $C_{pyrrole}$ ), 126.7 (CH, C7), 111.9 (CH, C8), 104.4 (CH, C3), 104.3 (CH,  $C_{pyrrole}$ ), 103.2 (CH,  $C_{pyrrole}$ ), 101.8 (CH,  $C_{pyrrole}$ ), 100.8 (CH,  $C_{pyrrole}$ ), 100.1 (CH,  $C_{pyrrole}$ ), 95.6 ( $C_q$ , C1), 77.5 (CH, C5), 68.2 (CH<sub>2</sub>,  $C_{thf}$ ), 42.6 ( $C_q$ ), 40.7 ( $C_{NCH_3}$ ), 39.1 ( $C_q$ ), 38.9 ( $C_{CH_3}$ ), 36.5 ( $C_q$ ), 36.5 ( $C_{CH_3}$ ), 36.4 ( $C_{CH_3}$ ), 36.2 ( $C_{CH_3}$ ), 28.1 ( $C_{CH_3}$ ), 27.1 ( $C_{CH_3}$ ), 26.4 ( $C_{CH_3}$ ), 26.1 ( $C_{CH_3}$ ), 25.9 ( $C_{thf}$ ), 23.9 ( $C_{CH_3}$ ).  $^7Li$  NMR (DCM- $d_2$ , 233 MHz, 295 K)  $\delta$ [ppm]: -4.1.

#### Synthesis of $[Li(thf)_4][1^*\text{-acetone}]$ :

To a solution of  $[Li(thf)_4][1\text{-}thf]$  (100 mg, 122  $\mu$ mol, 1.00 eq.) in 3 ml tetrahydrofuran, acetone (11.0  $\mu$ l, 8.7 mg, 151  $\mu$ mol, 1.20 eq.) was added and stirred for 5 min. Full conversion was detected by  $^1H$  NMR spectroscopy. All volatiles were removed under reduced pressure.  $[Li(thf)_4][1^*\text{-acetone}]$  was obtained as light yellow solid. Suitable crystals for SCXRD were obtained from dichloromethane, dimethoxyethane and *n*-pentane solution at -40 °C.  $^1H$  NMR (DCM- $d_2$ , 600 MHz, 295 K)  $\delta$ [ppm]: 7.51 (d,  $^3J_{HH}$  = 5.0 Hz, 1H,  $H_2$ ), 6.84 (d,  $^3J_{HH}$  = 5.0 Hz, 1H,  $H_3$ ), 6.19 (d,  $^3J_{HH}$  = 3.1 Hz, 1H,  $H_{pyrrole}$ ), 6.01 (d,  $^3J_{HH}$  = 3.1 Hz, 1H,  $H_{pyrrole}$ ), 5.93 (d,  $^3J_{HH}$  = 3.1 Hz, 1H,  $H_{pyrrole}$ ), 5.81 (d,  $^3J_{HH}$  = 3.1 Hz, 1H,  $H_{pyrrole}$ ), 5.79 (m, 2H,  $H_{pyrrole}$ ), 3.58 (m, 16H,  $H_{THF1}$ ), 1.81 (s, 3H,  $H_{CH_3}$ ), 1.79 (s, 3H,  $H_{CH_3}$ ), 1.77 (m, 16H,  $H_{THF1}$ ), 1.76 (s, 3H,  $H_{CH_3}$ ), 1.69 (s, 3H,  $H_{CH_3}$ ), 1.60 (s, 3H,  $H_{CH_3}$ ), 1.44 (s, 3H,  $H_{CH_3}$ ), 1.42 (s, 3H,  $H_{acetoneCH_3}$ ), 1.40 (s, 3H,  $H_{CH_3}$ ), 0.91 (s, 3H,  $H_{CH_3}$ ), 0.38 (s, 3H,  $H_{acetoneCH_3}$ ).  $^{13}C\{^1H\}$  NMR (DCM- $d_2$ , 150 MHz, 295 K)  $\delta$ [ppm]: 187.8 (C4), 159.7 (C2), 153.1 ( $C_{q,pyrrole}$ ), 150.4 ( $C_{q,pyrrole}$ ), 148.3 ( $C_{q,pyrrole}$ ), 147.3 ( $C_{q,pyrrole}$ ), 146.5 ( $C_{q,pyrrole}$ ), 141.2 ( $C_{q,pyrrole}$ ), 129.0 (C3), 103.5 ( $C_{CH,pyrrole}$ ), 103.4 ( $C_{CH,pyrrole}$ ), 103.0 ( $C_{CH,pyrrole}$ ), 100.7 ( $C_{CH,pyrrole}$ ), 100.7 ( $C_{CH,pyrrole}$ ), 100.3 ( $C_{CH,pyrrole}$ ), 96.6 (C1), 77.6 (C5), 68.2 ( $C_{THF}$ ), 42.2 ( $C_q$ ), 38.8 ( $C_q$ ), 38.4 ( $C_{CH_3}$ ), 36.5 ( $C_q$ ), 36.5 ( $C_{CH_3}$ ), 36.4 ( $C_q$ ), 35.6 ( $C_{CH_3}$ ), 30.0

(*C*<sub>acetoneCH3</sub>), 29.9 (*C*<sub>CH3</sub>), 29.0 (*C*<sub>acetoneCH3</sub>), 27.7 (*C*<sub>CH3</sub>), 27.1 (*C*<sub>CH3</sub>), 26.1 (*C*<sub>CH3</sub>), 25.8 (*C*<sub>THF</sub>), 24.9 (*C*<sub>CH3</sub>). <sup>7</sup>Li NMR (DCM-*d*<sub>2</sub>, 233 MHz, 295 K) δ[ppm]: -4.6.

#### Synthesis of [PPh<sub>4</sub>][1-acetone]:

To a solution of [PPh<sub>4</sub>][1] (100 mg, 122 μmol, 1.00 eq.) in 3 ml dichloromethane acetone (11.0 μl, 8.7 mg, 151 μmol, 1.20 eq.) was added and stirred for 5 min. Full conversion was detected by <sup>1</sup>H NMR spectroscopy. All volatiles were removed under reduced pressure. [1-acetone][PPh<sub>4</sub>] was obtained as yellow solid. Due to strong line broadening no appropriate <sup>13</sup>C{<sup>1</sup>H} NMR spectra was obtained. For further discussion of the dynamic behavior, see section 4. <sup>1</sup>H NMR (DCM-*d*<sub>2</sub>, 600 MHz, 295 K) δ[ppm]: 7.855 (m, 4H, *PPh*<sub>4</sub><sup>+</sup>), 7.68 (m, 8H, *PPh*<sub>4</sub><sup>+</sup>), 7.57 (m, 8H, *PPh*<sub>4</sub><sup>+</sup>), 5.76 (s, 8H, *H*<sub>pyrrole</sub>), 1.62 (s, 12H, *H*<sub>CH3</sub>), 1.62 (s, 3H, *H*<sub>acetoneCH3</sub>), 1.41 (s, 12H, *H*<sub>CH3</sub>), 1.26 (s, 3H, *H*<sub>acetoneCH3</sub>). <sup>31</sup>P NMRP NMR (DCM-*d*<sub>2</sub>, 243 MHz, 295 K) δ[ppm]: 23.20.

#### Synthesis of [Li(thf)<sub>4</sub>][1\*-cyclopentanone]:

To a solution of [Li(thf)<sub>4</sub>][1-thf] (100 mg, 122 μmol, 1.00 eq.) in 3 ml tetrahydrofuran, cyclopentanone (12.7 mg, 151 μmol, 1.20 eq.) was added and stirred for 5 min. Full conversion was monitored by <sup>1</sup>H NMR spectroscopy. 4 ml *n*-pentane were added to the solution and the yellow solid was separated by filtration from the solution. [Li(thf)<sub>4</sub>][1\*-cyclopentanone] was obtained as yellow solid. <sup>1</sup>H NMR (DCM-*d*<sub>2</sub>, 600 MHz, 295 K) δ[ppm]: 7.55 (d, <sup>3</sup>J<sub>HH</sub> = 5.0 Hz, 1H, *H*<sub>2</sub>), 6.85 (d, <sup>3</sup>J<sub>HH</sub> = 5.0 Hz, 1H, *H*<sub>3</sub>), 6.18 (d, <sup>3</sup>J<sub>HH</sub> = 3.1 Hz, 1H, *H*<sub>pyrrole</sub>), 6.00 (d, <sup>3</sup>J<sub>HH</sub> = 3.1 Hz, 1H, *H*<sub>pyrrole</sub>), 5.93 (d, <sup>3</sup>J<sub>HH</sub> = 3.1 Hz, 1H, *H*<sub>pyrrole</sub>), 5.81 (d, <sup>3</sup>J<sub>HH</sub> = 3.1 Hz, 1H, *H*<sub>pyrrole</sub>), 5.80 (d, <sup>3</sup>J<sub>HH</sub> = 3.1 Hz, 1H, *H*<sub>pyrrole</sub>), 5.79 (d, <sup>3</sup>J<sub>HH</sub> = 3.1 Hz, 1H, *H*<sub>pyrrole</sub>), 3.58 (m, 16H, *H*<sub>THF1</sub>), 1.86 (m, 1H, *H*<sub>CH2</sub>), 1.80 (s, 3H, *H*<sub>CH3</sub>), 1.77 (m, 16H, *H*<sub>THF1</sub>), 1.77 (s, 3H, *H*<sub>CH3</sub>), 1.75 (s, 3H, *H*<sub>CH3</sub>), 1.68 (s, 3H, *H*<sub>CH3</sub>), 1.60 (s, 3H, *H*<sub>CH3</sub>), 1.56 (m, 3H, *H*<sub>CH2</sub>), 1.44 (s, 3H, *H*<sub>CH3</sub>), 1.42 (s, 3H, *H*<sub>CH3</sub>), 1.40 (s, 1H, *H*<sub>CH2</sub>), 1.21 (m, 1H, *H*<sub>CH2</sub>), 0.91 (s, 3H, *H*<sub>CH3</sub>), 0.91 (s, 1H, *H*<sub>CH2</sub>), 0.76 (s, 1H, *H*<sub>CH2</sub>). <sup>13</sup>C{<sup>1</sup>H} NMR (DCM-*d*<sub>2</sub>, 150 MHz, 295 K) δ[ppm]: 186.8 (*C*<sub>4</sub>), 159.9 (*C*<sub>2</sub>), 153.1 (*C*<sub>q,pyrrole</sub>), 150.3 (*C*<sub>q,pyrrole</sub>), 148.7 (*C*<sub>q,pyrrole</sub>), 147.3 (*C*<sub>q,pyrrole</sub>), 146.7 (*C*<sub>q,pyrrole</sub>), 141.4 (*C*<sub>q,pyrrole</sub>), 128.6 (*C*<sub>3</sub>), 103.4 (*C*<sub>CH,pyrrole</sub>), 103.1 (*C*<sub>CH,pyrrole</sub>), 103.0 (*C*<sub>CH,pyrrole</sub>), 100.8 (*C*<sub>CH,pyrrole</sub>), 100.7 (*C*<sub>CH,pyrrole</sub>), 100.3 (*C*<sub>CH,pyrrole</sub>), 96.3 (*C*<sub>1</sub>), 88.4 (*C*<sub>5</sub>), 68.2 (*C*<sub>THF</sub>), 42.2 (*C*<sub>q</sub>), 39.3 (*C*<sub>CH2</sub>), 38.8 (*C*<sub>q</sub>), 38.5 (*C*<sub>CH3</sub>), 37.6 (*C*<sub>CH2</sub>), 36.5 (*C*<sub>CH3</sub>), 36.4 (*C*<sub>q</sub>), 36.3 (*C*<sub>q</sub>), 36.2 (*C*<sub>CH3</sub>), 29.1 (*C*<sub>CH3</sub>), 27.5 (*C*<sub>CH3</sub>), 27.1 (*C*<sub>CH3</sub>), 26.2 (*C*<sub>CH3</sub>), 25.8 (*C*<sub>THF</sub>), 24.1 (*C*<sub>CH3</sub>), 23.5 (*C*<sub>CH2</sub>), 21.0 (*C*<sub>CH2</sub>). <sup>7</sup>Li NMR (DCM-*d*<sub>2</sub>, 243 MHz, 295 K) δ[ppm]: -4.7.

#### Synthesis of [PPh<sub>4</sub>][1-cyclopentanone]:

To a solution of [PPh<sub>4</sub>][1] (100 mg, 122 μmol, 1.00 eq.) in 3 ml dichloromethane, cyclopentanone (12.7 mg, 151 μmol, 1.20 eq.) was added and stirred for 5 min. Full conversion was monitored by <sup>1</sup>H NMR spectroscopy. [PPh<sub>4</sub>][1-cyclopentanone] was obtained as light yellow solid.

<sup>1</sup>H NMR (DCM-*d*<sub>2</sub>, 600 MHz, 295 K) δ[ppm]: 7.83-7.80 (m, 4H, *PPh*<sub>4</sub><sup>+</sup>), 7.67-7.65 (m, 8H, *PPh*<sub>4</sub><sup>+</sup>), 7.56-7.52 (m, 8H, *PPh*<sub>4</sub><sup>+</sup>), 5.78 (s, 4H, *H*<sub>pyrrole</sub>), 5.74 (s, 4H, *H*<sub>pyrrole</sub>), 1.61 (s, 6H, *H*<sub>CH3</sub>), 1.59 (s, 6H, *H*<sub>CH3</sub>), 1.52 (s, 4H, *H*<sub>CH2</sub>), 1.42 (s, 4H, *H*<sub>CH2</sub>), 1.39 (s, 3H, *H*<sub>CH3</sub>), 1.24 (s, 3H, *H*<sub>CH3</sub>). <sup>13</sup>C{<sup>1</sup>H} NMR (DCM-*d*<sub>2</sub>, 150 MHz, 295 K) δ[ppm]: 148.0 (*C*<sub>q,pyrrole</sub>), 147.1 (*C*<sub>q,pyrrole</sub>), 136.2 (d, <sup>4</sup>J<sub>CP</sub> = 3.1 Hz, CH, *PPh*<sub>4</sub><sup>+</sup>), 134.8 (d, <sup>2</sup>J<sub>CP</sub> = 10.3 Hz, CH, *PPh*<sub>4</sub><sup>+</sup>), 131.0 (d, <sup>3</sup>J<sub>CP</sub> = 12.9 Hz, CH, *PPh*<sub>4</sub><sup>+</sup>), 117.9 (d, <sup>1</sup>J<sub>CP</sub> = 89.8 Hz, *C*<sub>q</sub>, *PPh*<sub>4</sub><sup>+</sup>), 101.8 (*C*<sub>CH,pyrrole</sub>), 99.7 (*C*<sub>CH,pyrrole</sub>), 41.3 (*C*<sub>CH3</sub>), 39.8 (*C*<sub>CH2</sub>), 37.4 (*C*<sub>CH3</sub>), 36.0 (*C*<sub>q</sub>), 35.8 (*C*<sub>q</sub>), 34.2 (*C*<sub>CH3</sub>), 26.0 (*C*<sub>CH3</sub>), 23.3 (*C*<sub>CH2</sub>). <sup>31</sup>P NMR (DCM-*d*<sub>2</sub>, 243 MHz, 295 K) δ[ppm]: 23.2.

#### Synthesis of [PPh<sub>4</sub>][1-formamide]:

To a solution of [PPh<sub>4</sub>][1] (100 mg, 122 μmol, 1.00 eq.) in 3 ml dichloromethane, formamide (5.5 mg, 122 μmol, 1.00 eq.) was added and stirred for 5 min. Full conversion was monitored by <sup>1</sup>H NMR spectroscopy. Crystallization started immediately at rt and produced suitable material for SCXRD measurements. <sup>1</sup>H NMR (DCM-*d*<sub>2</sub>, 200 MHz, 295 K) δ[ppm]: 7.86-7.84 (m, 4H, *PPh*<sub>4</sub><sup>+</sup>), 7.69-7.66 (m, 8H, *PPh*<sub>4</sub><sup>+</sup>), 7.54-7.53 (m, 8H, *PPh*<sub>4</sub><sup>+</sup>), 5.77 (s, 8H, *H*<sub>pyrrole</sub>), 1.58 (s, 12H, *H*<sub>CH3</sub>), 1.33 (s, 12H, *H*<sub>CH3</sub>). <sup>13</sup>C{<sup>1</sup>H} NMR (DCM-*d*<sub>2</sub>, 150 MHz, 295 K) δ[ppm]: 163.9 (*C*<sub>Aldehyde</sub>), 147.6 (*C*<sub>q,pyrrole</sub>), 136.1 (d, <sup>4</sup>J<sub>CP</sub> = 3.1 Hz, CH, *PPh*<sub>4</sub><sup>+</sup>), 134.8

(d,  $^2J_{CP} = 10.3$  Hz, CH,  $PPh_4^+$ ), 131.0 (d,  $^3J_{CP} = 12.9$  Hz, CH,  $PPh_4^+$ ), 117.9 (d,  $^1J_{CP} = 89.8$  Hz, C<sub>q</sub>,  $PPh_4^+$ ), 101.1 ( $C_{CH,pyrrole}$ ), 36.0 ( $C_{CH3}$ ).  $^{31}P$  NMR (DCM- $d_2$ , 243 MHz, 295 K)  $\delta$ [ppm]: 23.2.

Synthesis of  $[PPh_4][1\text{-dimethylformamide}]$ :

To a solution of  $[PPh_4][1]$  (100 mg, 122  $\mu$ mol, 1.00 eq.) in 3 ml dichloromethane, dimethylformamide (8.9 mg, 122  $\mu$ mol, 1.00 eq.) was added and stirred for 5 min. All volatiles were removed under reduced pressure.  $[PPh_4][1\text{-dimethylformamide}]$  was obtained as light yellow solid. Suitable crystals for SCXRD were obtained from a dichloromethane solution at rt. Due to strong line broadening no appropriate  $^{13}C\{^1H\}$  NMR could be obtained.  $^1H$  NMR (DCM- $d_2$ , 600 MHz, 295 K)  $\delta$ [ppm]: 7.83 (m, 4H,  $PPh_4^+$ ), 7.67 (m, 8H,  $PPh_4^+$ ), 7.56-7.52 (m, 8H,  $PPh_4^+$ ), 5.75 (s, 8H,  $H_{pyrrole}$ ), 5.03 (s, 1H,  $H_{CH,dimethylformamide}$ ), 2.71 (s, 3H,  $H_{CH3,dimethylformamide}$ ), 2.64 (s, 3H,  $H_{CH3,dimethylformamide}$ ), 1.60 (s, 12H,  $H_{CH3}$ ), 1.33 (s, 12H,  $H_{CH3}$ ).  $^{31}P$  NMR (DCM- $d_2$ , 243 MHz, 295 K)  $\delta$ [ppm]: 23.2.

### 3. $^{13}\text{CO}_2$ labeling experiments

$[\text{Li}(\text{thf})_4][\mathbf{1}\text{-thf}]$  was dissolved in  $\text{THF-}d_8$ , the solution degassed by 3 freeze-pump-thaw cycles and 1 bar  $^{13}\text{CO}_2$  was added. After completion of the reaction, monitored by  $^1\text{H}$  and  $^{13}\text{C}\{^1\text{H}\}$  NMR spectroscopy, the solution was degassed 3 times and 1 bar  $^{12}\text{CO}_2$  was added. The exchange was studied at room temperature over 24 h. Characteristic regions are shown in figures S 1 and S 2.

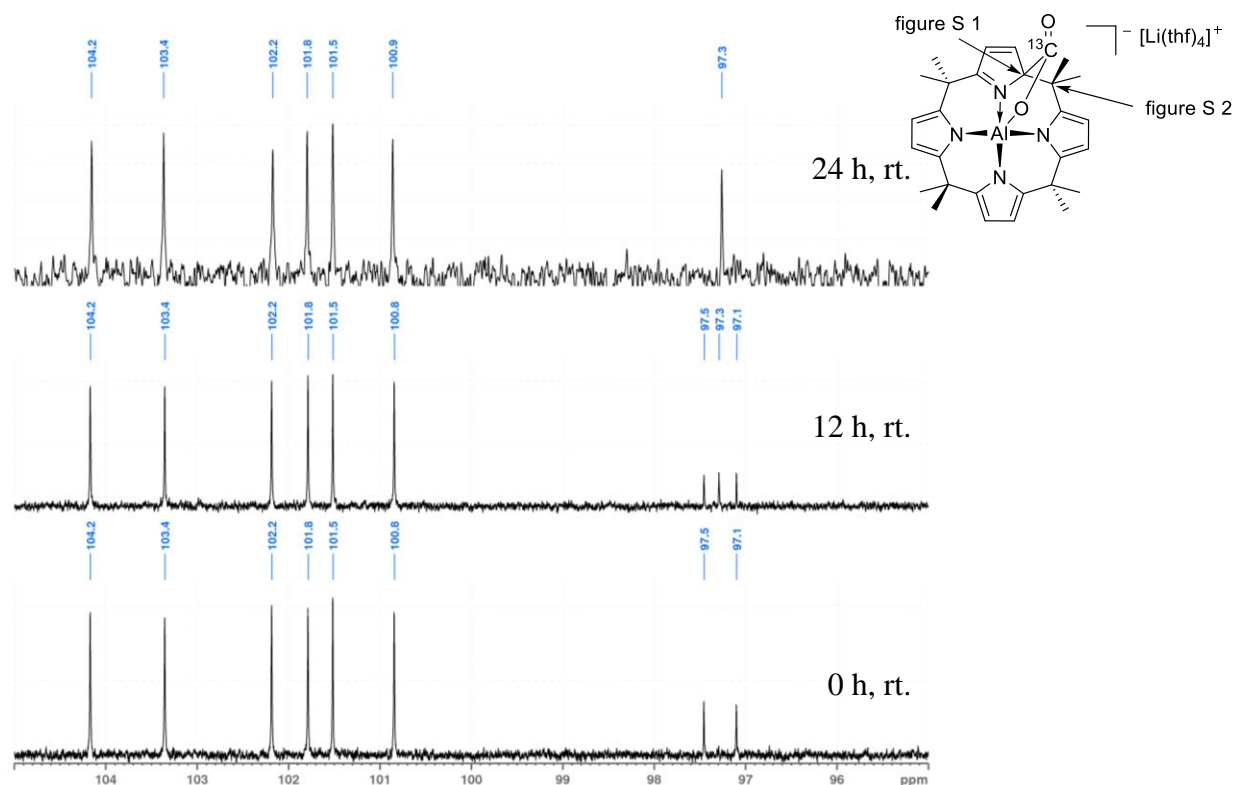

**Figure S 1:** Stacked  $^{13}\text{C}\{^1\text{H}\}$  NMR (150 MHz,  $\text{THF-}d_8$ , 295 K) spectra showing an exchange of isotope-labeled  $^{13}\text{CO}_2$  against non-labeled  $^{12}\text{CO}_2$  at room temperature. It is monitored by the doublet ( $\delta[\text{ppm}]$ : 97.5 and 97.1,  $J_{^{13}\text{C},^{12}\text{C}} = 53.5$  Hz) at 0 h at room temperature of  $[\text{Li}(\text{thf})_4][\mathbf{1}^{\text{-}^{13}\text{CO}_2}]$ , considered carbon atom can be found in the sketch above, in between after 12 h at room temperature the singlet ( $\delta[\text{ppm}]$ : 97.3) of the  $[\text{Li}(\text{thf})_4][\mathbf{1}^{\text{-}\text{CO}_2}]$  is arising, showing full conversion after 24h at room temperature.

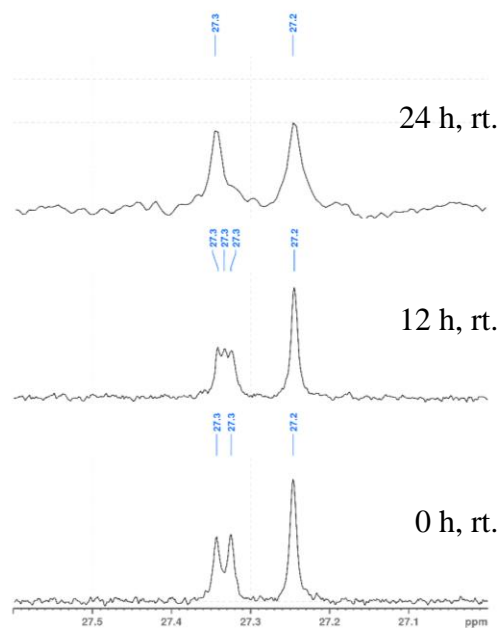

**Figure S 2:** Stacked  $^{13}\text{C}\{^1\text{H}\}$  NMR (150 MHz,  $\text{THF}-d_8$ , 295 K) spectra showing an exchange of isotope-labeled  $^{13}\text{CO}_2$  against non-labeled  $^{12}\text{CO}_2$  at room temperature. It is monitored by the doublet ( $\delta[\text{ppm}]$ : 27.3  $J_{^{13}\text{C},^{12}\text{C}} = 2.8$  Hz) at 0 h at room temperature of  $[\text{Li}(\text{thf})_4][1^{*-13}\text{CO}_2]$ , considered carbon atom can be found in the sketch above, in between after 12 h at room temperature the singlet of the  $[\text{Li}(\text{thf})_4][1^{*}\text{-CO}_2]$  is arising, showing full conversion after 24h at room temperature.

#### 4. Variable temperature $^1\text{H}$ NMR measurements of $[\text{PPh}_4][1\text{-acetone}]$

Low temperature  $^1\text{H}$  NMR measurements of a sample of  $[\text{PPh}_4][1\text{-acetone}]$  in  $\text{DCM-}d_2$  revealed a shift in the chemical equilibrium between  $[\text{PPh}_4][1\text{-acetone}]$  and  $[\text{PPh}_4][1^*\text{-acetone}]$  toward the latter at low temperatures. However, the equilibrium is still lying clearly on the side of  $[\text{PPh}_4][1\text{-acetone}]$ .

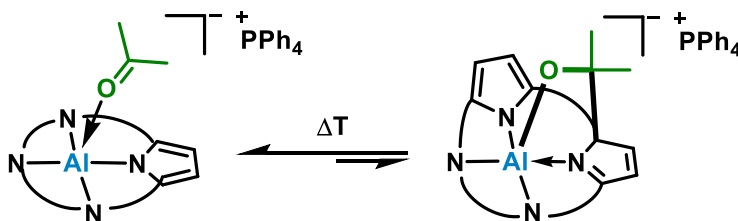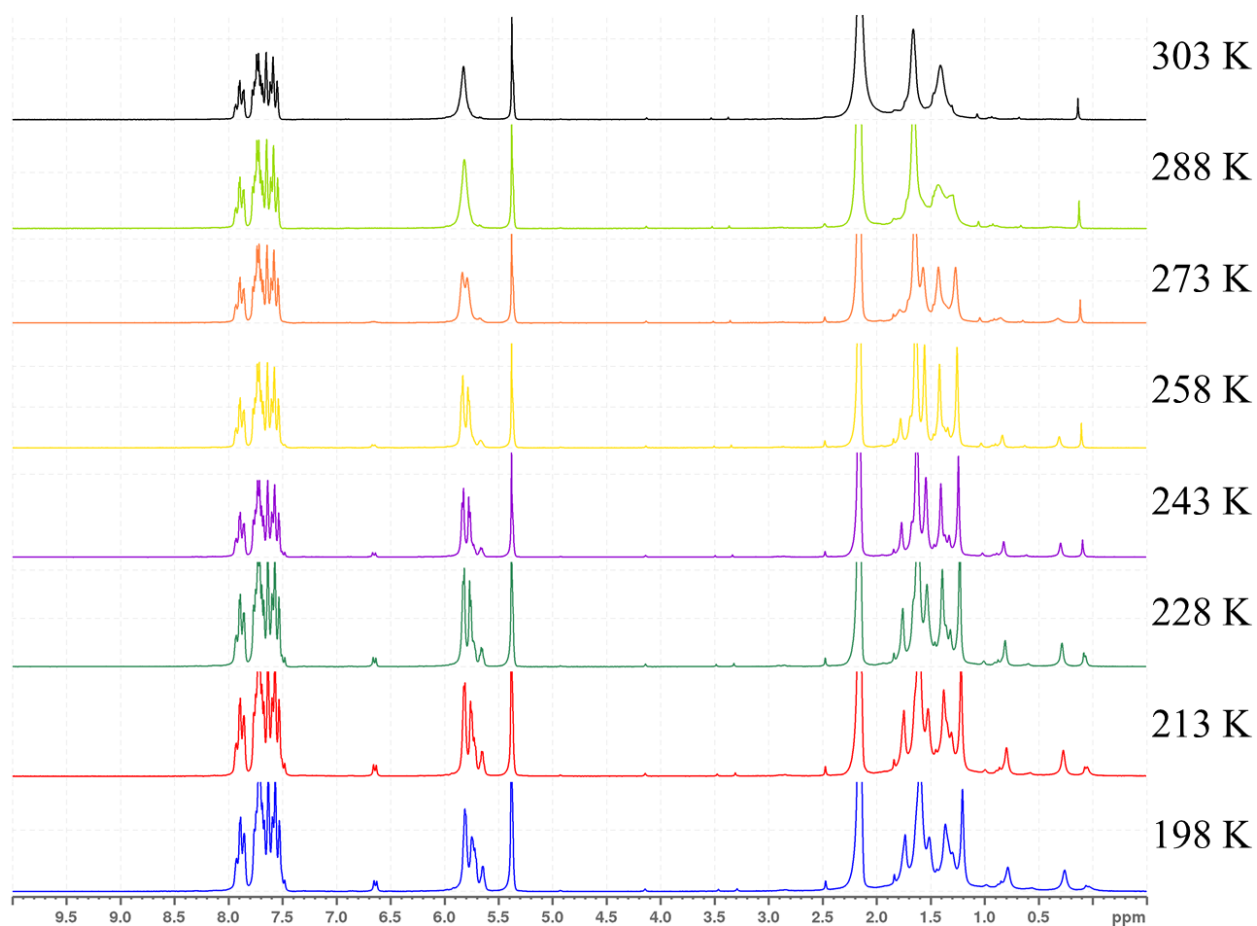

**Figure S 3:** VT  $^1\text{H}$  NMR spectrum (200 MHz,  $\text{DCM-}d_2$ , 303-198 K) of  $[\text{PPh}_4][1\text{-acetone}]$  revealed  $[\text{PPh}_4][1^*\text{-acetone}]$  at low temperatures. The rising doublet at around 6.6 ppm indicates  $[\text{PPh}_4][1^*\text{-acetone}]$ .

## 5. Dynamics and different Isomers of [1-*p*DMA-BA][PPh<sub>4</sub>]

Mixing *p*-dimethylaminobenzaldehyde 1:1 with [PPh<sub>4</sub>][1] in dichloromethane-*d*<sub>2</sub> at room temperature yields a <sup>1</sup>H NMR spectrum (see fig. S 4) that shows broad peaks of the substrate and the aluminate anion. Due to the dynamics at room temperature, the sample was cooled to -25 °C and full characterization utilizing multinuclear NMR measurements was conducted. A discrete <sup>1</sup>H NMR spectrum (see fig. S 5) was obtained, showing four different species. These were identified by the aromatic signal sets of the *p*-dimethylaminobenzaldehyde considering <sup>1</sup>H <sup>1</sup>H COSY cross peak analysis (see fig. S 7). The corresponding signal sets are marked with green connecting arrows in figure S 5. Manifesting the dynamic exchange of the species, various <sup>1</sup>H <sup>1</sup>H NOESY- exchange cross peaks (see fig. S 8) are obtained (marked with dashed orange arrows in fig. S 5), none of them within the same signal set. Moreover, the exchange from sigma to 1,2-adducts is highlighted by the methyl signal sets of *p*-dimethylaminobenzaldehyde at  $\delta$  = 2.7 and 3.0 ppm. The four isomers were calculated by DFT calculations and are shown in figure S 6 (for the comparison of the energies of the isomers see section 12.2). Because of the four isomers and the dynamics, no meaningful <sup>13</sup>C{<sup>1</sup>H} NMR spectrum could be obtained.

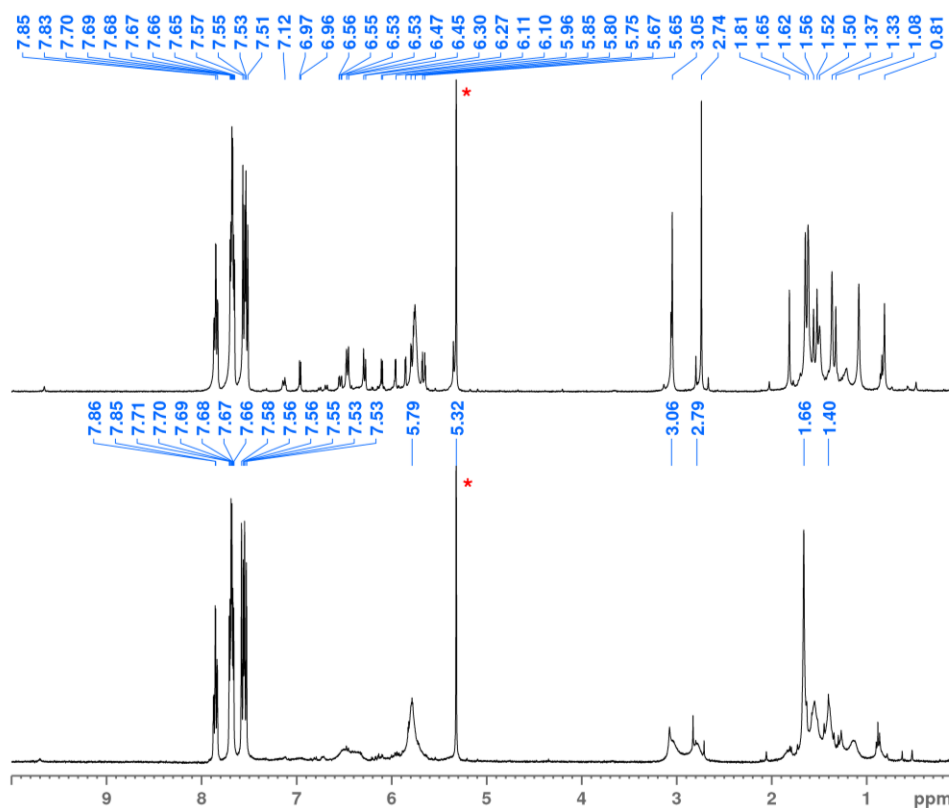

**Figure S 4:** <sup>1</sup>H NMR (400 MHz, DCM-*d*<sub>2</sub>, 295 K / 270 K) spectra of [PPh<sub>4</sub>][1] with *p*DMA-BA at room temperature (bottom) and 270 K showing four isomers.

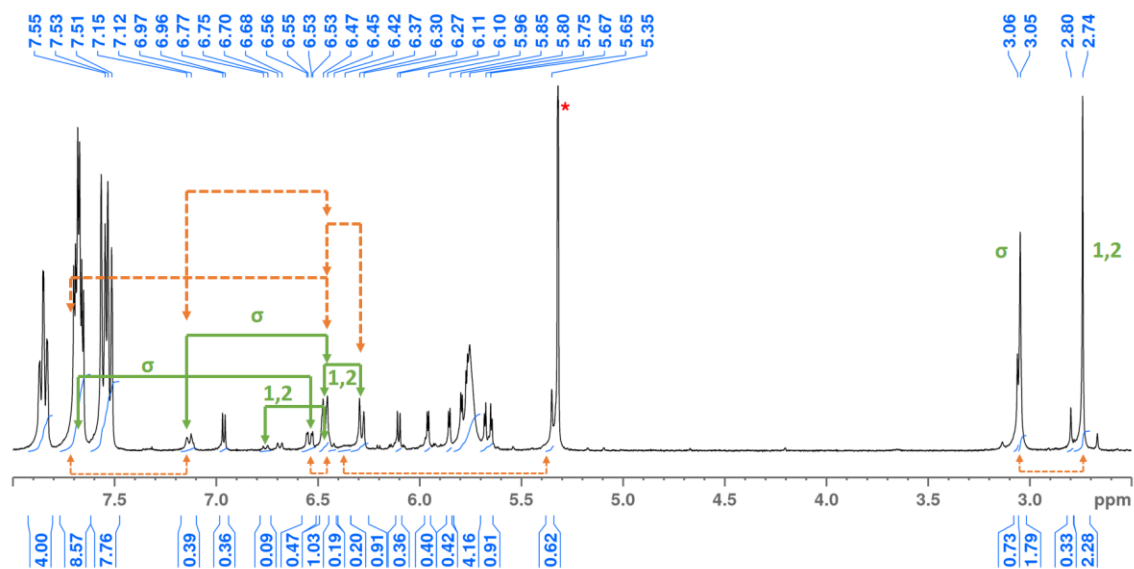

**Figure S 5:**  $^1\text{H}$  NMR (400 MHz,  $\text{DCM}-d_2$ , 270 K) spectrum of  $[\text{PPh}_4][1]$  with  $p\text{DMA-BA}$  at 270 K showing four different isomers (see. fig. S 6). Orange-dashed arrows dynamic exchange pathways found by  $^1\text{H}$   $^1\text{H}$  NOESY NMR, green arrows indicate connections found by  $^1\text{H}$   $^1\text{H}$  COSY NMR of different coordination of  $p\text{DMA-BA}$ .

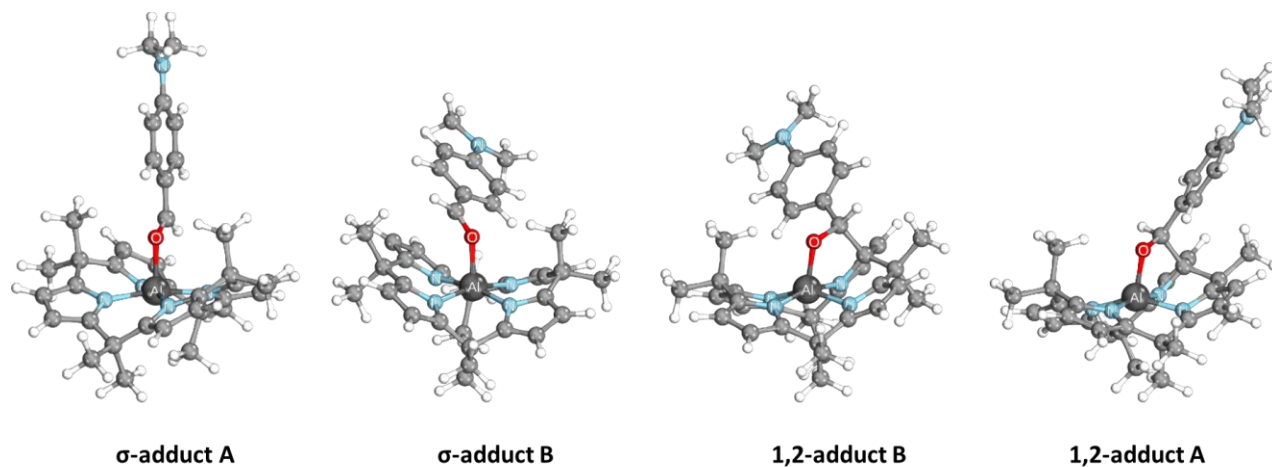

**Figure S 6** Visualization of different Isomers of  $[1-p\text{DMA-BA}]$  and  $[1^*-p\text{DMA-BA}]$ .

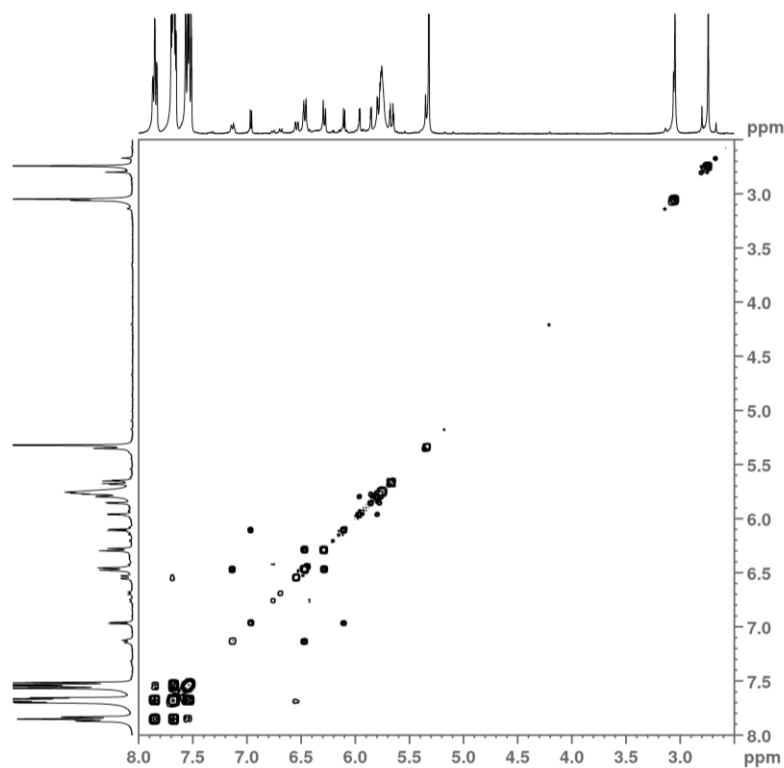

**Figure S 7:**  $^1\text{H}$   $^1\text{H}$  COSY NMR (400 MHz,  $\text{DCM-d}_2$ , 270 K) spectrum of a mixture of isomers of  $[\text{PPh}_4][1]$  with *p*DMA-BA.

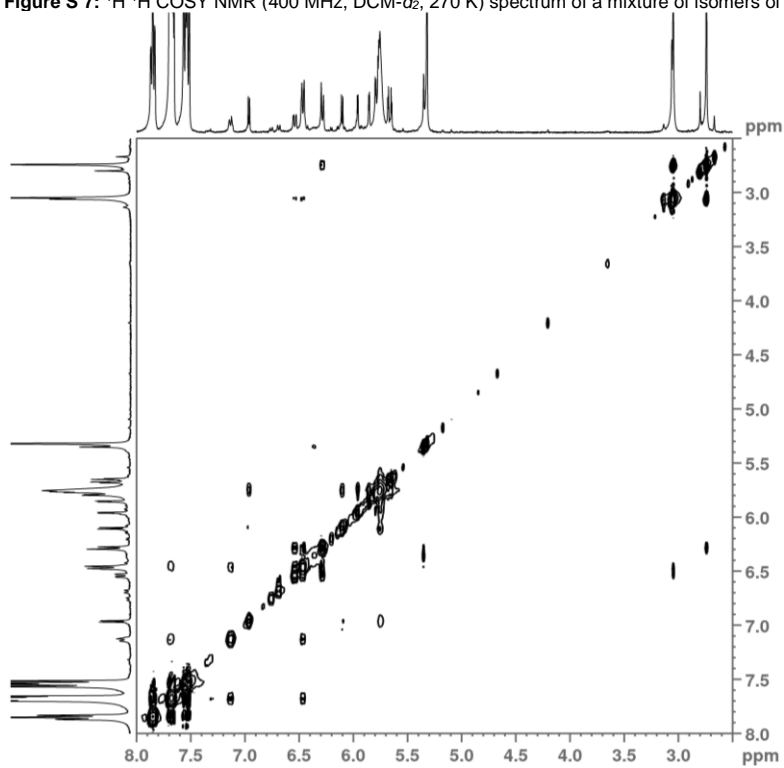

**Figure S 8:**  $^1\text{H}$   $^1\text{H}$  NOESY NMR (400 MHz,  $\text{DCM-d}_2$ , 270 K) spectrum of a mixture of isomers of  $[\text{PPh}_4][1]$  with *p*DMA-BA.

6. Exchange of  $[\text{PPh}_4][1^*\text{-CyA}]$  monitored by 2D EXSY NMR spectroscopy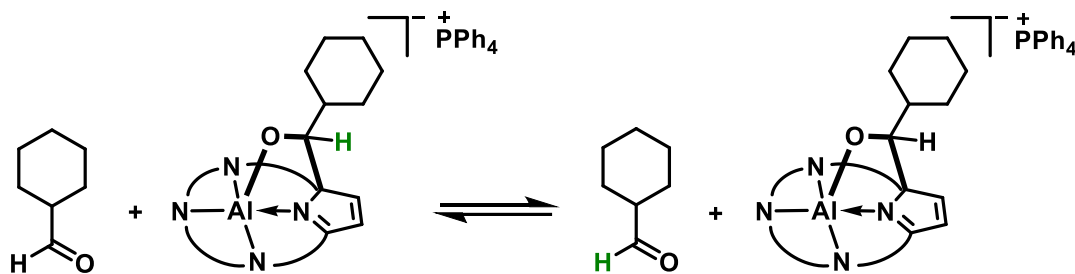

The shown reaction was studied via EXSY NMR spectroscopy using cross-peak integration with three different concentrations (22 mM, 34 mM, 64 mM, see fig S 9) of additional cyclohexanecarboxaldehyde at rt in  $\text{DCM-d}_2$ . The aldehyde-hydrogen atom was found appropriate for quantitative evaluation in both the free ( $\delta = 9.58$ , d) and the bound substrate ( $\delta = 4.14$ , d) as no signal overlapping occurred. Concentration independence is shown in figure S 10 – S 12.

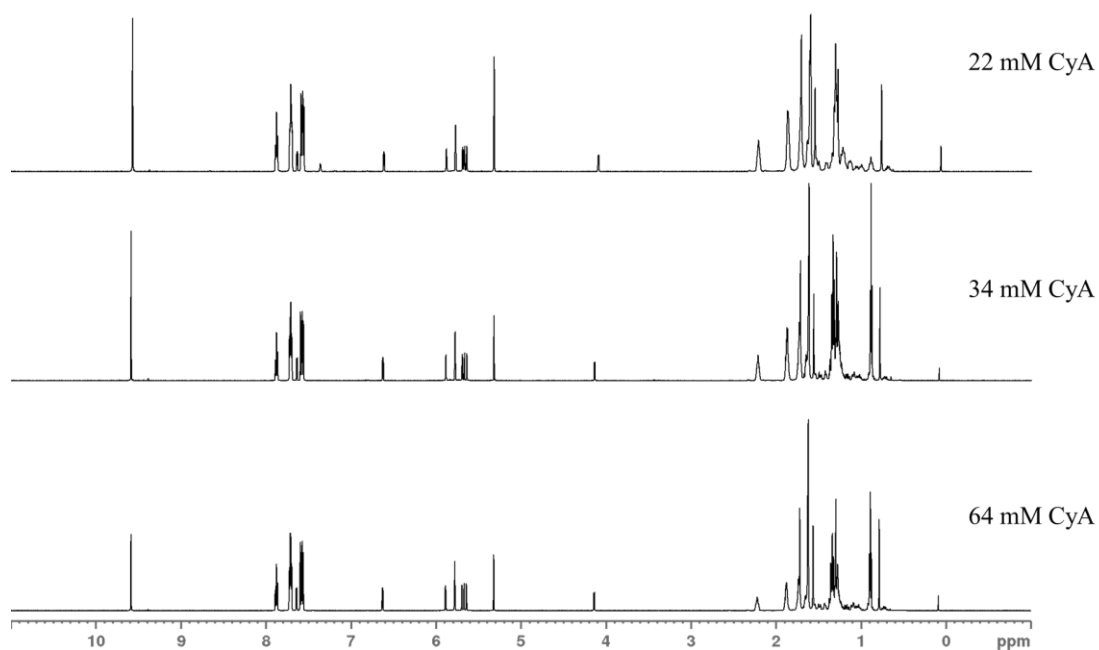

**Figure S 9:**  $^1\text{H}$  NMR (600 MHz,  $\text{DCM-d}_2$ , 295 K) of  $[\text{PPh}_4][1^*\text{-cyclohexanecarboxaldehyde}]$  with three different concentrations of free CyA (22 mM, 34 mM, 64 mM).

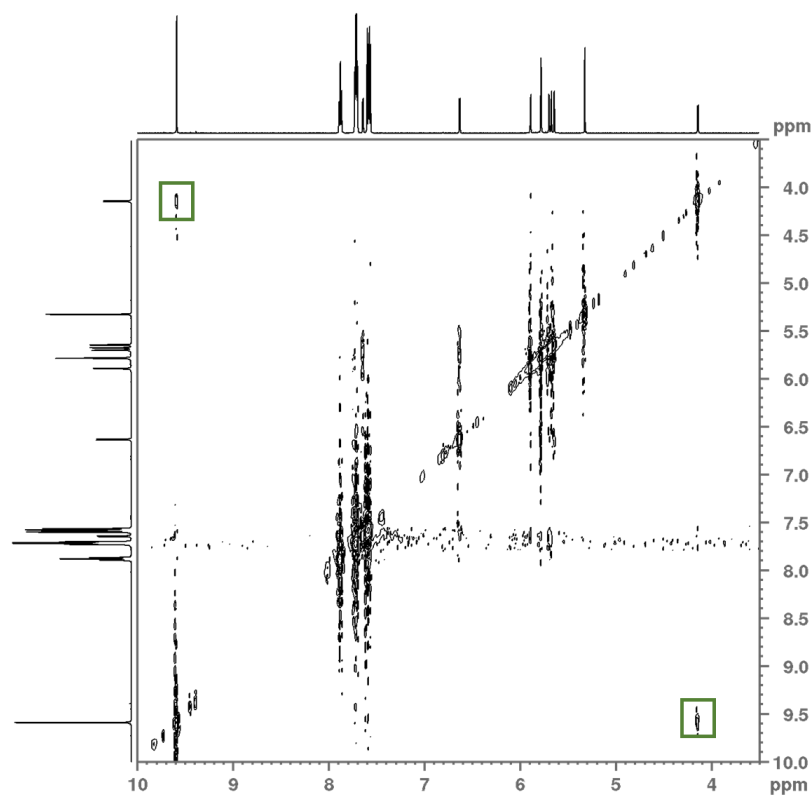

**Figure S 10:** <sup>1</sup>H <sup>1</sup>H NOESY NMR (600 MHz, DCM-*d*<sub>2</sub>, 295 K) of [PPh<sub>4</sub>][1\*-cyclohexanecarboxaldehyde]. Parameters: d1 = 40 s, d8 = 0.4 s, conc. CyA: 22 mMol.

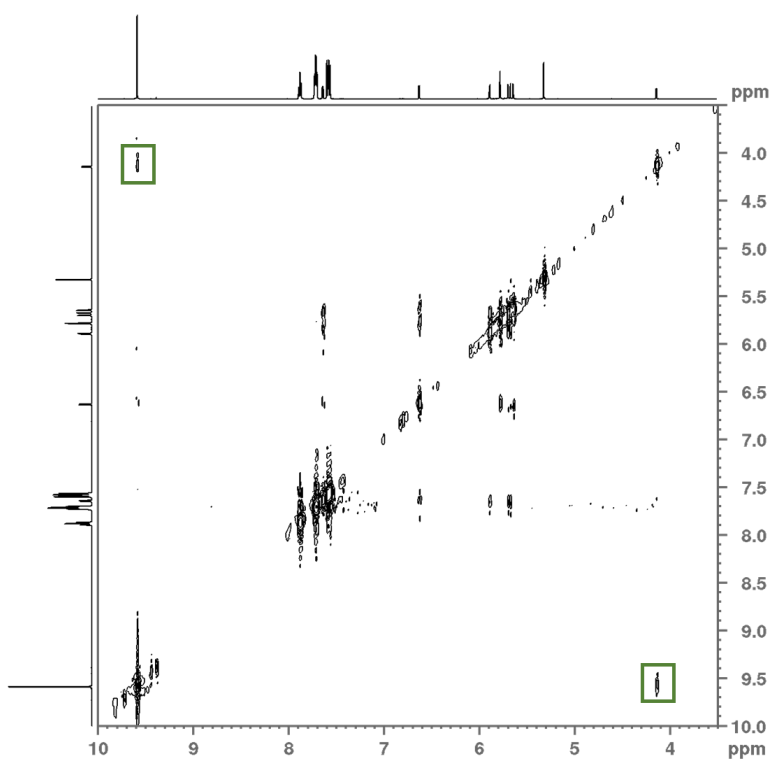

**Figure S 11:** <sup>1</sup>H <sup>1</sup>H NOESY NMR (600 MHz, DCM-*d*<sub>2</sub>, 295 K) of [PPh<sub>4</sub>][1\*-cyclohexanecarboxaldehyde]. Parameters: d1 = 40 s, d8 = 0.4 s, conc. CyA: 34 mMol.

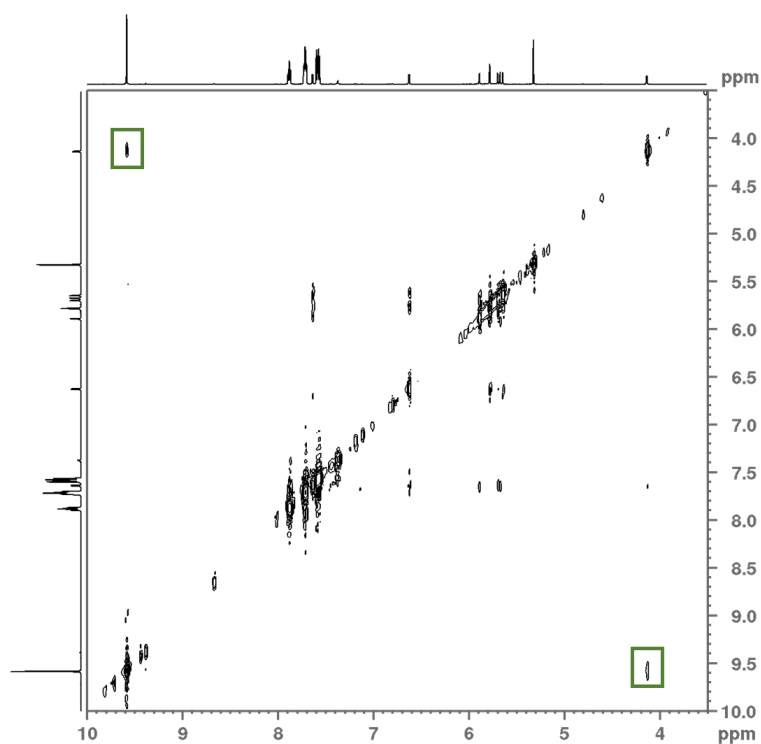

**Figure S 12:**  $^1\text{H}$   $^1\text{H}$  NOESY NMR (600 MHz,  $\text{DCM}-d_2$ , 295 K) of  $[\text{PPh}_4][1^*\text{-cyclohexanecarboxaldehyde}]$ . Parameters:  $d_1 = 40$  s,  $d_8 = 0.4$  s, conc. CyA: 64 mMol.

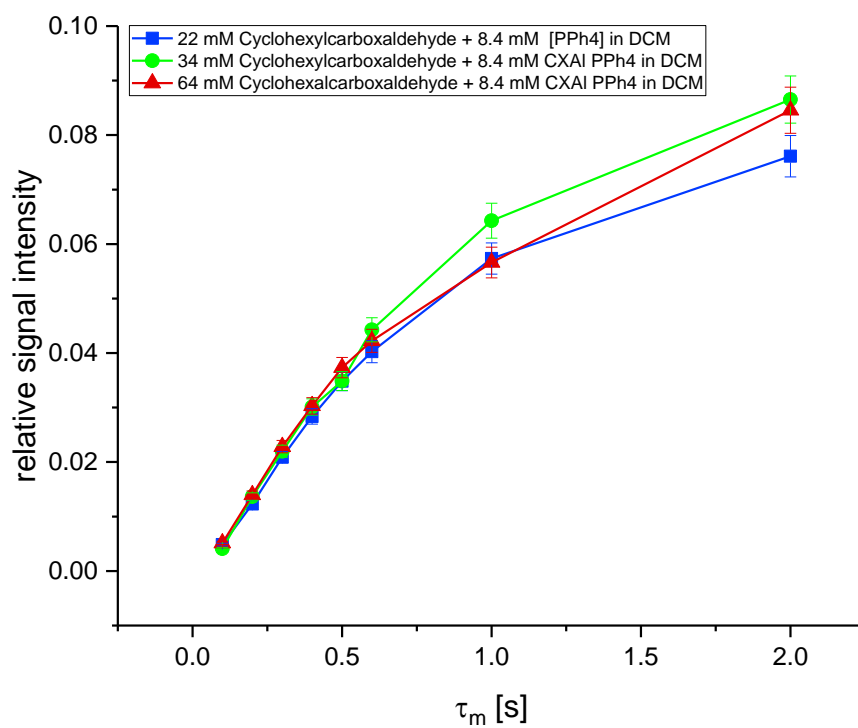

**Figure S 13:** EXSY plot of relative signal intensities vs. mixing time of the considered integrals marked in figure S 10 – S 12.

**Table S 1:** Integrals obtained from EXSY spectroscopy over different mixing times, following the exchange from free CyA to bound CyA with [1][PPh<sub>4</sub>].

|          | 22 mM CyA + 8.4 mM [PPh <sub>4</sub> ][1] in DCM |          |           | 34 mM CyA + 8.4 mM [PPh <sub>4</sub> ][1] in DCM |          |           | 64 mM CyA + 8.4 mM [PPh <sub>4</sub> ][1] in DCM |          |           |
|----------|--------------------------------------------------|----------|-----------|--------------------------------------------------|----------|-----------|--------------------------------------------------|----------|-----------|
| $\tau_m$ | Exchange                                         | free CyA | Bound CyA | Exchange                                         | free CyA | Bound CyA | Exchange                                         | free CyA | Bound CyA |
| 0.1      | 0.005                                            | 1.610    | 1.000     | 0.004                                            | 2.585    | 1.000     | 0.005                                            | 4.495    | 1.000     |
| 0.2      | 0.012                                            | 1.586    | 0.939     | 0.014                                            | 2.499    | 0.941     | 0.014                                            | 4.497    | 0.935     |
| 0.3      | 0.021                                            | 1.531    | 0.832     | 0.022                                            | 2.489    | 0.839     | 0.023                                            | 4.438    | 0.863     |
| 0.4      | 0.028                                            | 1.563    | 0.760     | 0.030                                            | 2.460    | 0.758     | 0.030                                            | 4.457    | 0.745     |
| 0.5      | 0.035                                            | 1.524    | 0.687     | 0.035                                            | 2.421    | 0.691     | 0.037                                            | 4.416    | 0.684     |
| 0.6      | 0.040                                            | 1.525    | 0.613     | 0.044                                            | 2.280    | 0.651     | 0.042                                            | 4.432    | 0.632     |
| 1        | 0.057                                            | 1.454    | 0.372     | 0.064                                            | 2.301    | 0.366     | 0.057                                            | 4.287    | 0.382     |
| 2        | 0.076                                            | 1.286    | 0.147     | 0.087                                            | 1.992    | 0.134     | 0.085                                            | 3.961    | 0.146     |

$k_{\text{forward}}$  determined with EXSY Calc for all three concentrations from cross peak exchange:

| c(CyA) | $k_{\text{forward}}$ |
|--------|----------------------|
| 22 mM  | 0.08016667           |
| 34 mM  | 0.08183333           |
| 64 mM  | 0.08316667           |

Based on this median rate constant  $k_{\text{forward}} = 0.08 \text{ s}^{-1}$  and the Eyring-Polanyi equation

$$k = \frac{k_B T}{h} \exp\left(-\frac{\Delta G^\ddagger}{RT}\right)$$

the energy barrier of the exchange could be determined to 79.4 kJ/mol.

## 7. Influence of Li<sup>+</sup> on the addition mode

### 7.1. Influence on the coordination mode

As discussed in the manuscript, the binding mode of substrates toward the calix[4]pyrrolato-aluminate can be controlled by the influence of the counter cation. The following spectra unfold this feature. In any case, full conversion of  $\sigma$ -adducts to 1,2 adducts proceeded by adding any soluble Li<sup>+</sup> source. Exemplarily, the different coordination of cyclopentanone with [PPh<sub>4</sub>][1] and [Li(thf)<sub>4</sub>][1] is shown in figure S 14 and S 15. Taking a sample of [PPh<sub>4</sub>][1-*p*DMA-BA], showing strong dynamics at room temperature (see. section 5) and adding LiI led directly to the 1,2 adduct shown in figure S 16. Moreover, adding LiI to a sample of [PPh<sub>4</sub>][1-acetone], which presented high exchange between bound and free acetone, detected by <sup>1</sup>H <sup>1</sup>H NOESY NMR spectroscopy at rt (see fig. S 17), led to [Li(L)<sub>n</sub>][1\*-acetone], showing just negligible exchange between free and bound acetone, detected by <sup>1</sup>H <sup>1</sup>H NOESY NMR (see fig. S 18 and S 19). The limits of this concept are defined by formamide as a substrate. The addition of Li<sup>+</sup> to [PPh<sub>4</sub>][1-formamide] in DCM-d<sub>2</sub> did not induce MLC-type binding and [1\*-formamide] was not obtained (see fig. S 20).

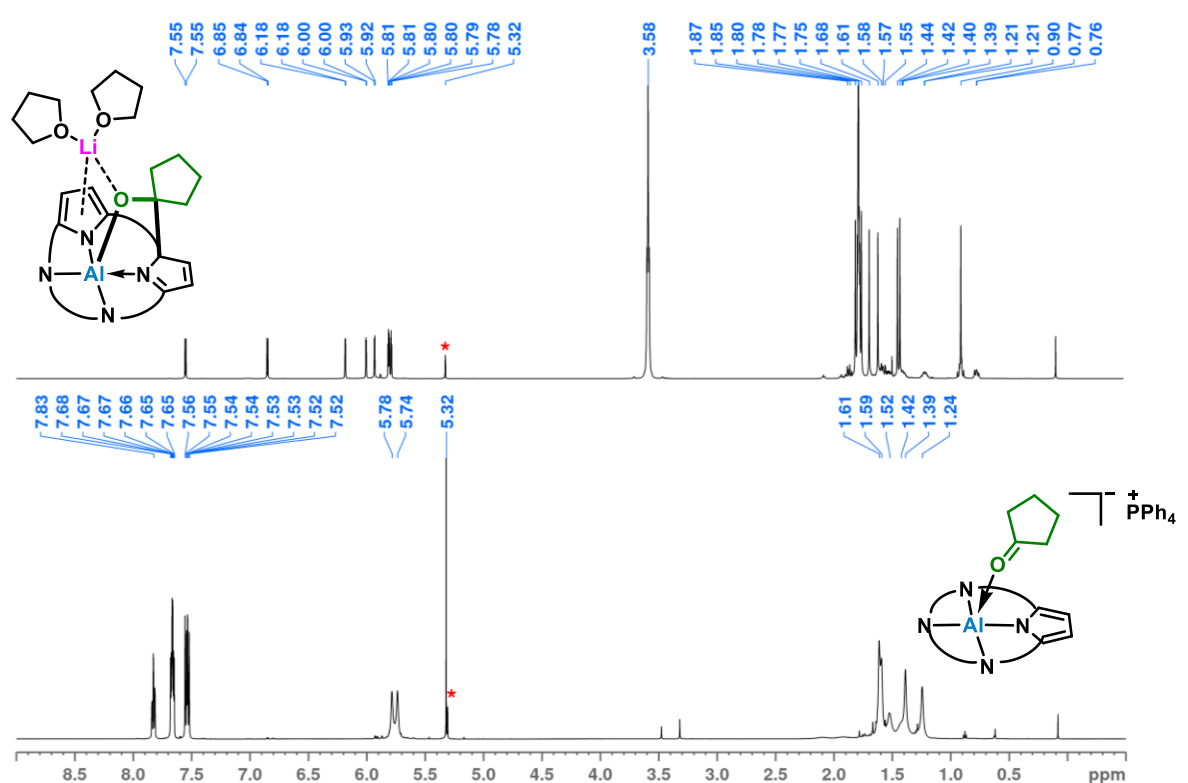

**Figure S 14:** <sup>1</sup>H NMR (600 MHz, DCM-d<sub>2</sub>, 295 K) spectra of  $\sigma$ -coordinated [PPh<sub>4</sub>][1-cyclopentanone] and 1,2 bound [Li(thf)<sub>2</sub>][1\*-cyclopentanone], demonstrating the “click” due to coordination of Li<sup>+</sup>.

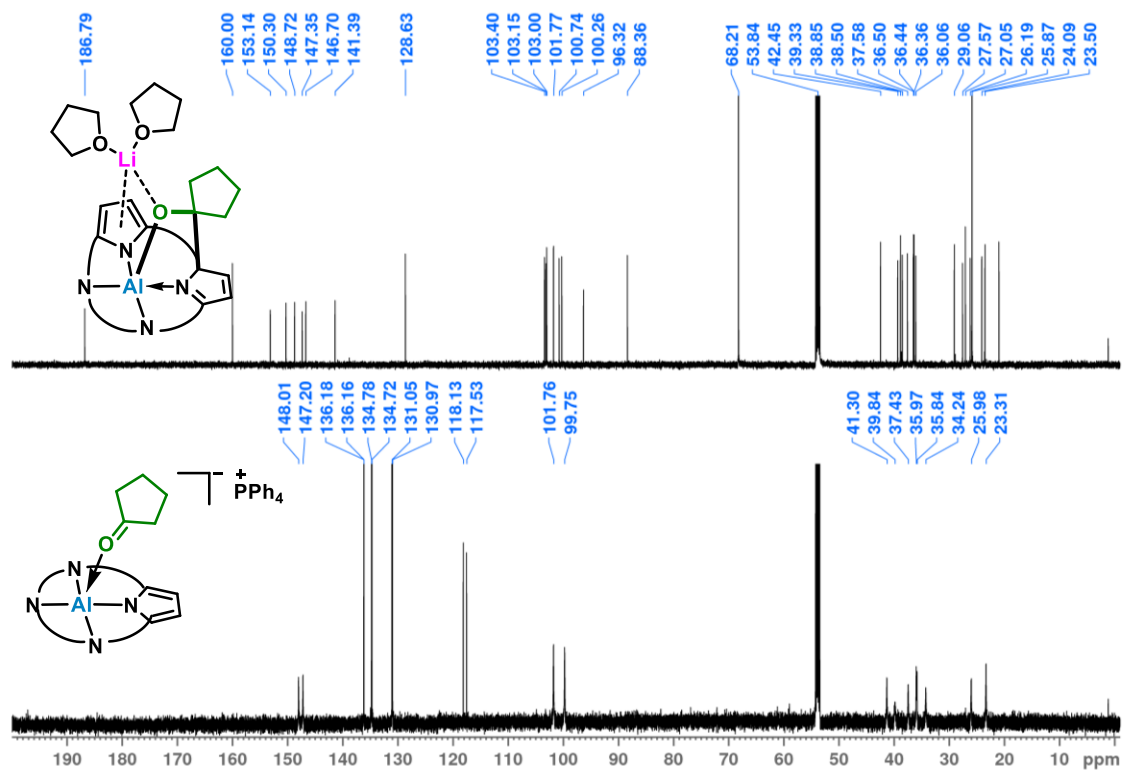

**Figure S 15:**  $^{13}\text{C}\{^1\text{H}\}$  NMR (150 MHz,  $\text{DCM}-d_2$ , 295 K) spectra of  $\sigma$ -coordinated  $[\text{PPh}_4][1\text{-cyclopentanone}]$  and 1,2 bound  $[\text{Li}(\text{thf})_2][1^*\text{-cyclopentanone}]$ , demonstrating the “click” due to coordination of  $\text{Li}^+$ .

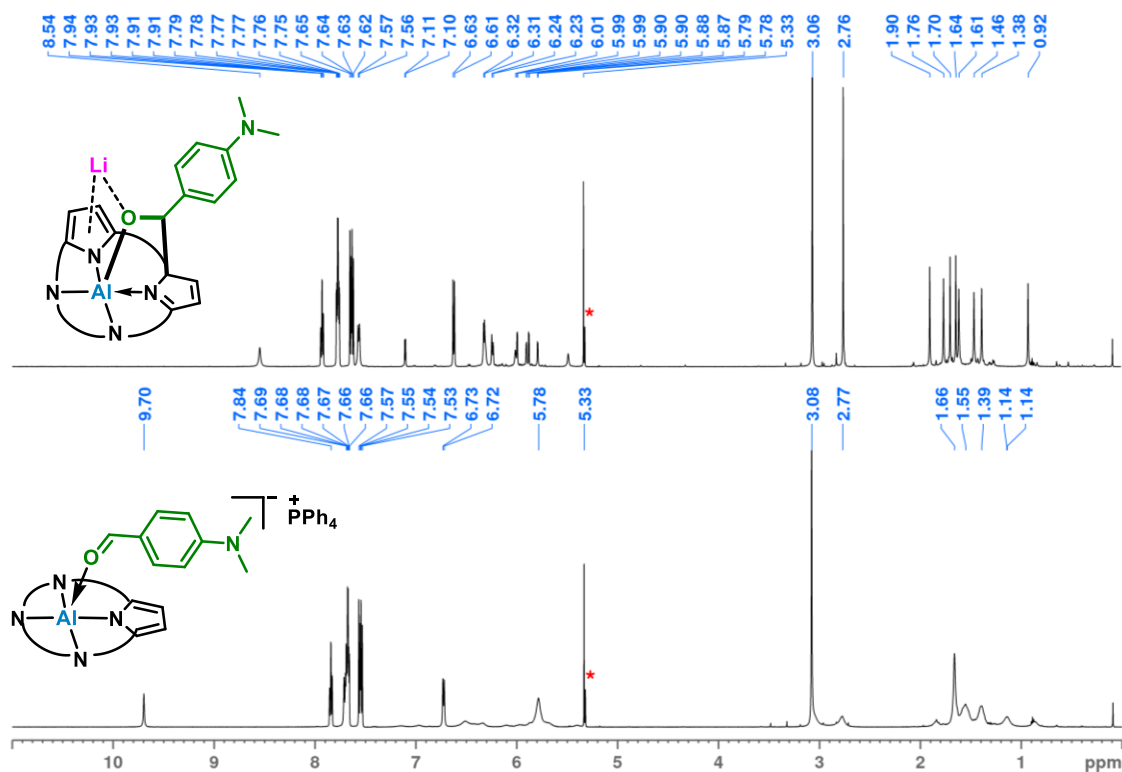

**Figure S 16:**  $^1\text{H}$  NMR (600 MHz,  $\text{DCM}-d_2$ , 295 K) spectra of  $\sigma$ -coordinated  $[\text{PPh}_4][1\text{-pDMA-BA}]$  and 1,2 bound  $[\text{Li}][1^*\text{-pDMA-BA}]$ , demonstrating the “click” due to coordination of  $\text{Li}^+$ .

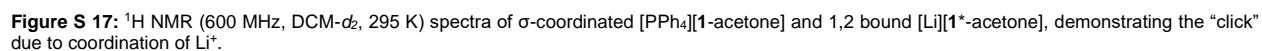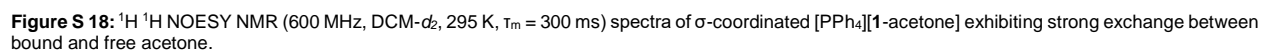

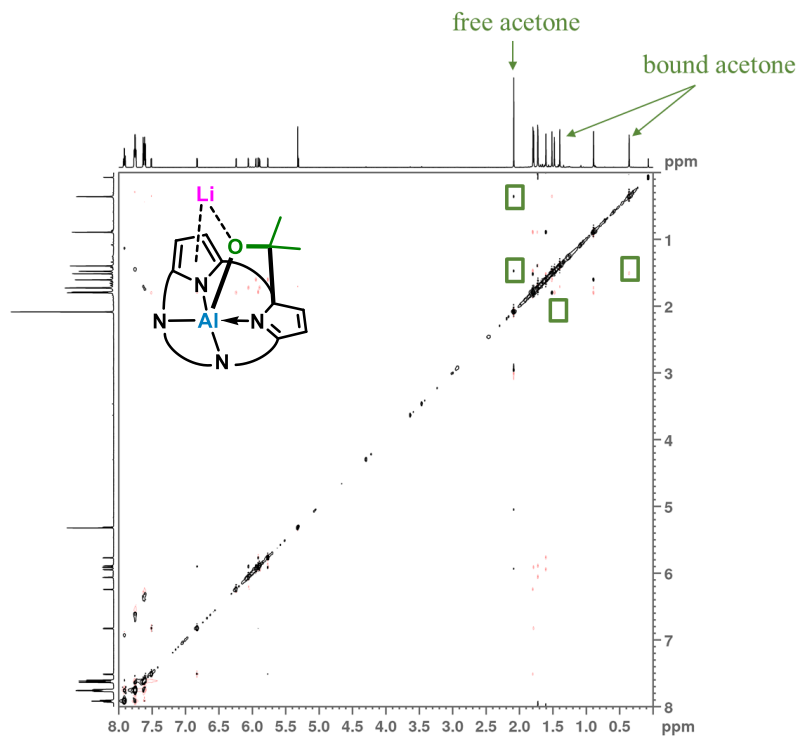

**Figure S 19:**  $^1\text{H}$   $^1\text{H}$  NOESY NMR (600 MHz,  $\text{DCM}-d_2$ , 295 K,  $\tau_m = 300$  ms) spectra of 1,2 bound  $[\text{Li}][1^*\text{-acetone}]$  exhibiting negligible exchange between bound and free acetone.

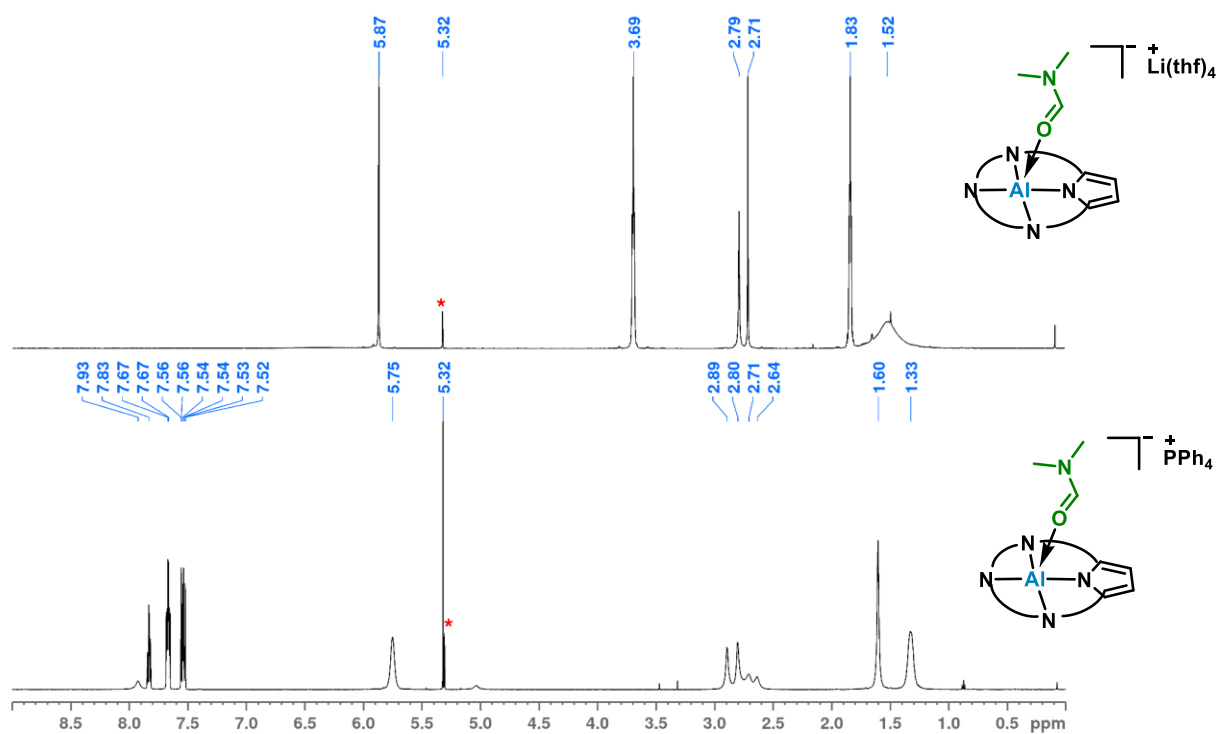

**Figure S 20:**  $^1\text{H}$  NMR (600 MHz,  $\text{DCM}-d_2$ , 295 K) spectra of  $\sigma$ -coordinated  $[\text{PPh}_4][1\text{-dimethylformamide}]$  and  $\sigma$ -coordinated  $[\text{Li}(\text{thf})_4][1\text{-dimethylformamide}]$ , demonstrating the limitation of the controlling of the coordination mode.

## 7.2. Reversibility of coordination mode

The reversibility of the coordination of  $[\text{Li}]^+$  to control the binding mode of the substrates were investigated and are exemplarily shown for cyclopentanone changing from  $[\text{Li}(\text{thf})_2][1^*\text{-cyclopentanone}]$  to  $[\text{Li}(\text{12crown4})(\text{thf})_2][1\text{-cyclopentanone}]$  and back to  $[\text{Li}(\text{thf})_2][1^*\text{-cyclopentanone}]$  by subsequently conducted additions of excesses of  $[\text{12}]\text{crown-4}$  or  $\text{LiI}$  (see fig. S 20).

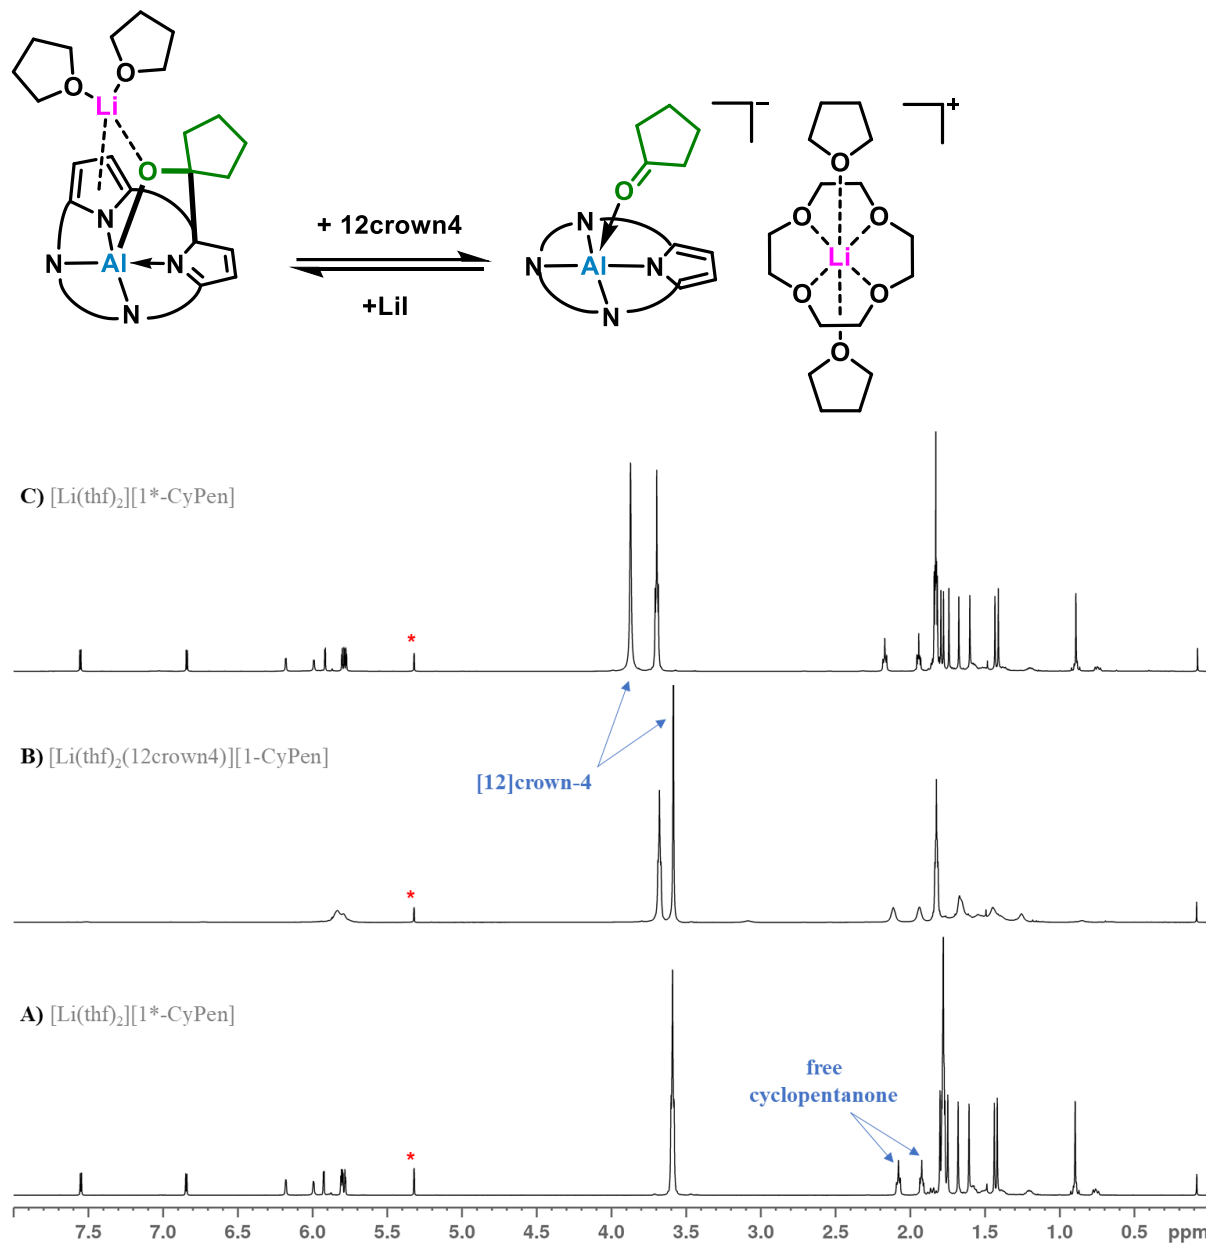

**Figure S 21:**  $^1\text{H}$  NMR (600 MHz,  $\text{DCM}-d_2$ , 295 K) spectra of A)  $[\text{Li}(\text{thf})_2][1^*\text{-cyclopentanone}]$ , B) after addition of  $[\text{12}]\text{crown-4}$  giving rise of  $[\text{Li}(\text{12crown-4})(\text{thf})_2][1\text{-cyclopentanone}]$  and C) after further addition of  $\text{LiI}$  obtaining  $[\text{Li}(\text{thf})_2][1^*\text{-cyclopentanone}]$  again.

## 8. Substrate exchange experiments

This section sketches the conducted exchange experiments between various adducts and various substrates listed in table S 2. All starting adducts were freshly prepared and subjected to the substrate of interest at rt. If no exchange occurred at rt the solution was heated up to 70 °C for the stated time to study the behavior at elevated temperature.

**Table S 2:** Scope of the exchange experiments performed in the given solvent at room temperature. Observed coordination mode of each substrate is given and the occurrence of the exchange marked with yes (y) or no (n).

|                        | solvent | adduct sub-<br>strate | coordination<br>before<br>exchange | exchange<br>substrate        | exchange<br>proceed | coordination af-<br>ter exchange | figure  |
|------------------------|---------|-----------------------|------------------------------------|------------------------------|---------------------|----------------------------------|---------|
| [Li][1]                | thf     | <i>p</i> Me-BA        | 1,2                                | <i>p</i> NO <sub>2</sub> -BA | y                   | 1,2                              | S 22    |
| [Li][1]                | thf     | CO <sub>2</sub>       | 1,2                                | <i>p</i> NO <sub>2</sub> -BA | y                   | 1,2                              | S 23/24 |
| [Li][1]                | thf     | CO <sub>2</sub>       | 1,2                                | <i>p</i> DMA-BA              | y <sup>a</sup>      | -                                | S 25/26 |
| [Li][1]                | thf     | CO <sub>2</sub>       | 1,2                                | CyA                          | y <sup>a</sup>      | -                                | S27/28  |
| [Li][1]                | thf     | CO <sub>2</sub>       | 1,2                                | CyPen                        | n                   | -                                | S 29/30 |
| [Li][1]                | thf     | CO <sub>2</sub>       | 1,2                                | <i>p</i> Me-BA               | y <sup>a</sup>      | -                                | S 31/32 |
| [Li][1]                | thf     | CO <sub>2</sub>       | 1,2                                | acetone                      | n                   | -                                | S 33/34 |
| [Li][1]                | dcm     | acetone               | 1,2                                | <i>p</i> DMA-BA              | y                   | 1,2                              | S 35    |
| [Li][1]                | dcm     | <i>p</i> DMA-BA       | 1,2                                | CyA                          | y                   | 1,2                              | S 36    |
| [PPh <sub>4</sub> ][1] | dcm     | acetone               | σ                                  | <i>p</i> DMA-BA              | y                   | σ                                | S 37    |
| [PPh <sub>4</sub> ][1] | dcm     | <i>p</i> DMA-BA       | σ                                  | CyA                          | y                   | 1,2                              | S 38    |
| [PPh <sub>4</sub> ][1] | dcm     | <i>p</i> Me-BA        | 1,2                                | CyA                          | y <sup>b</sup>      | 1,2                              | S 39    |
| [Li][1]                | dcm     | <i>p</i> DMA-BA       | 1,2                                | <i>p</i> M-BA                | y                   | 1,2                              | S 40    |

<sup>a</sup>exchange proceed at a higher temperature

<sup>b</sup>equilibrium occurred

The green asterisk marks free substrate or substrate in excess. The red asterisk marks the solvent residual signal. Characteristic peaks indicating the exchange are marked and followed with blue arrows.

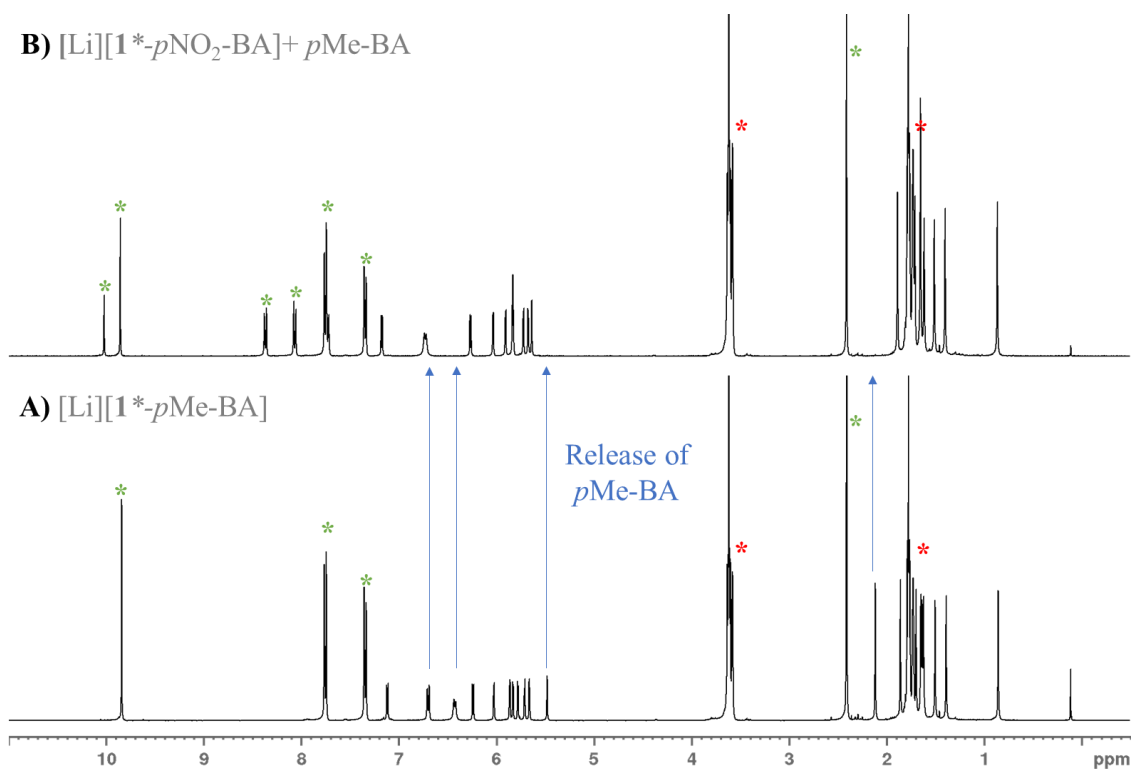

**Figure S 22:** Exchange of  $p\text{Me-BA}$  against  $p\text{NO}_2\text{-BA}$  in  $\text{THF-d}_8$  at room temperature at  $[\text{Li}][1]$  followed by  $^1\text{H}$  NMR spectroscopy (200 MHz,  $\text{THF-d}_8$ , 295 K) from A) to B). The spectra were measured directly after the addition of the substrates.

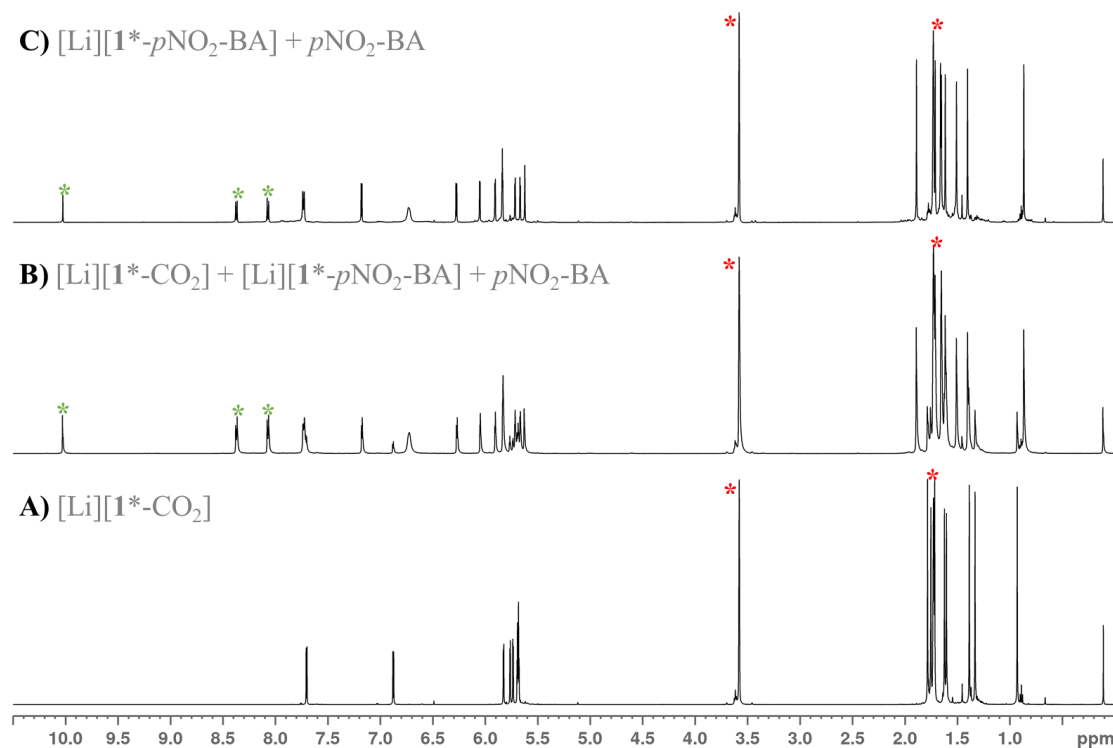

**Figure S 23:** Exchange of  $\text{CO}_2$  against  $p\text{NO}_2\text{-BA}$  in  $\text{THF-d}_8$  at room temperature at  $[\text{Li}][1]$  followed by  $^1\text{H}$  NMR spectroscopy (600 MHz,  $\text{THF-d}_8$ , 295 K) from A) showing the pure  $\text{CO}_2$  adduct, to B) after three hours at rt showing both adducts, to C) after two days showing full conversion to the  $p\text{NO}_2\text{-BA}$  adduct.

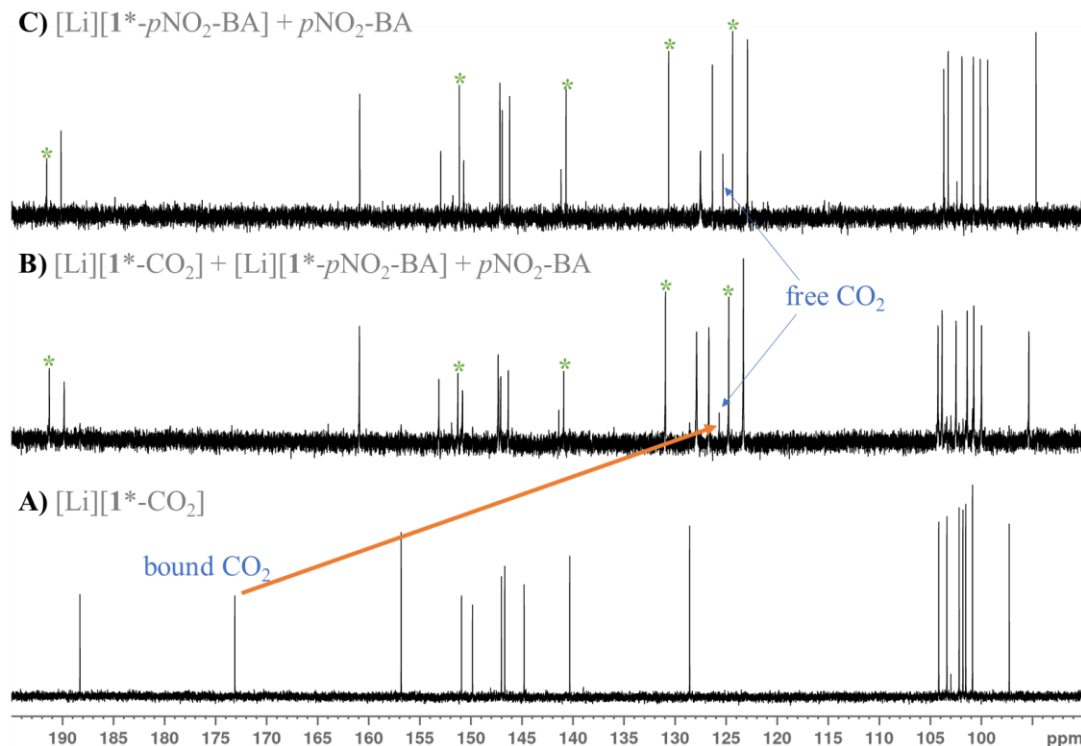

**Figure S 24:** Exchange of  $\text{CO}_2$  against  $p\text{NO}_2\text{-BA}$  in  $\text{THF-}d_8$  at room temperature at  $[\text{Li}][1]$  followed by  $^{13}\text{C}\{^1\text{H}\}$  NMR spectroscopy (150 MHz,  $\text{THF-}d_8$ , 295 K) from A) showing the pure  $\text{CO}_2$  adduct, to B) after three hours at rt showing both adducts, to C) after two days showing full conversion to the  $p\text{NO}_2\text{-BA}$  adduct

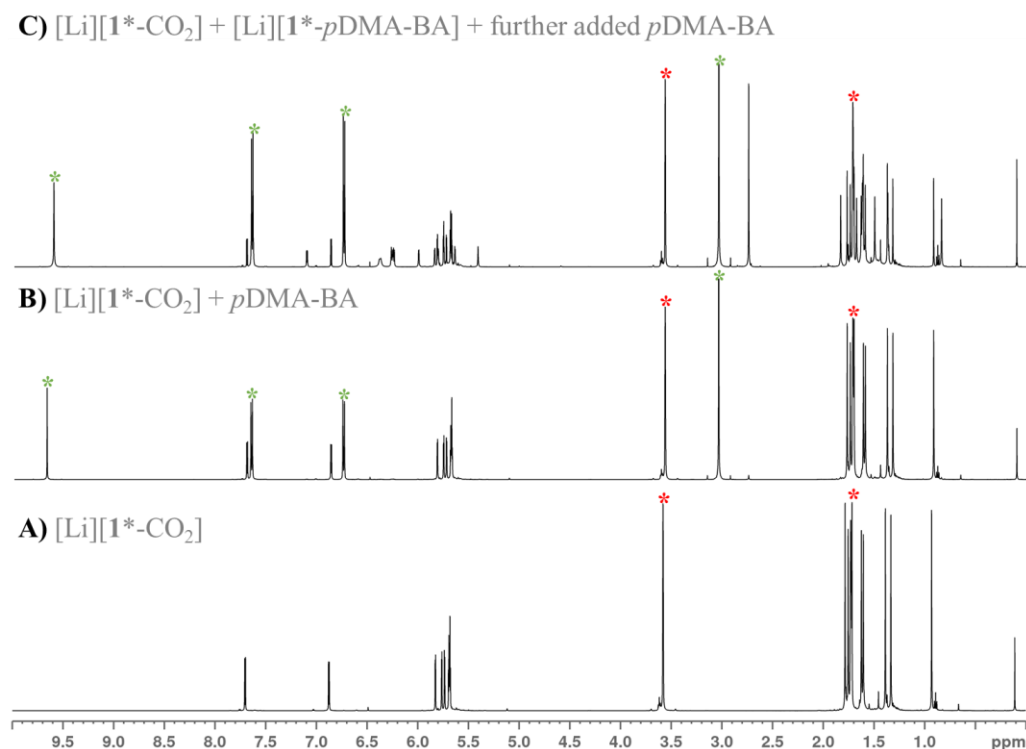

**Figure S 25:** Exchange of  $\text{CO}_2$  against  $p\text{DMA-BA}$  in  $\text{THF-}d_8$  at room temperature at  $[\text{Li}][1]$  followed by  $^1\text{H}$  NMR spectroscopy (600 MHz,  $\text{THF-}d_8$ , 295 K) from A) showing the pure  $\text{CO}_2$  adduct, to B) after three hours at rt after  $p\text{DMA-BA}$  addition showing no exchange, to C) after 42 h at 70 °C with further addition of  $p\text{DMA-BA}$  showing conversion to a ratio of 1:0.82 of  $p\text{DMA-BA}:\text{CO}_2$ .

C)  $[\text{Li}][1^*-\text{CO}_2] + [\text{Li}][1^*-\text{pDMA-BA}] + \text{further added pDMA-BA}$

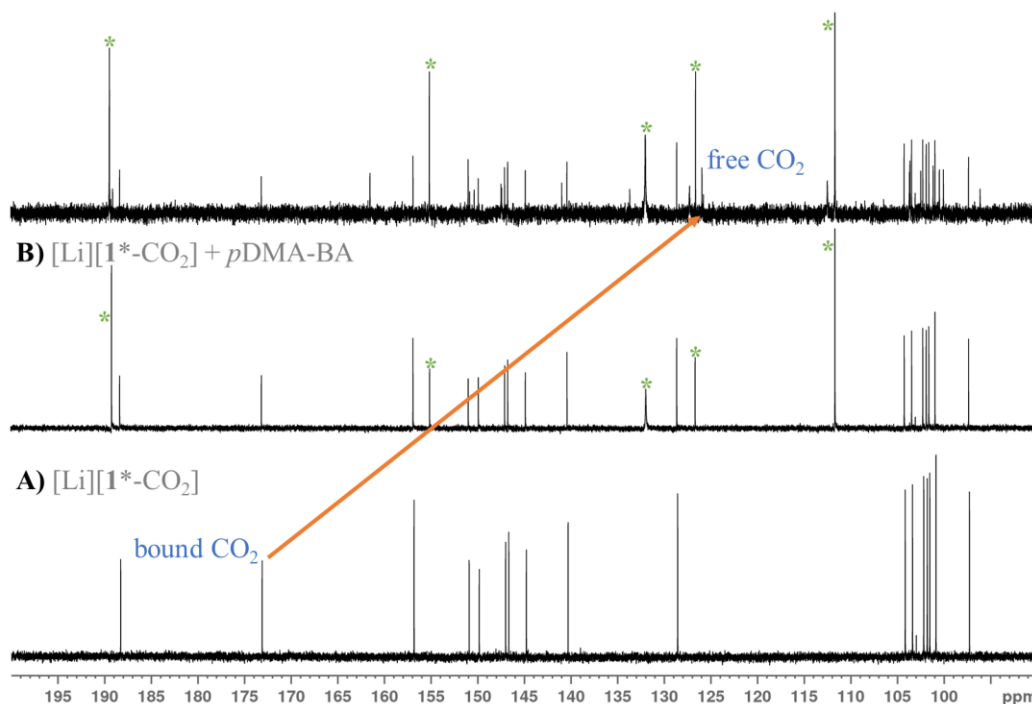

**Figure S 26:** Exchange of  $\text{CO}_2$  against  $\text{pDMA-BA}$  in  $\text{THF-d}_8$  at room temperature at  $[\text{Li}][1]$  followed by  $^{13}\text{C}\{^1\text{H}\}$  NMR spectroscopy (150 MHz,  $\text{THF-d}_8$ , 295 K) from A) showing the pure  $\text{CO}_2$  adduct, to B) after three hours at rt after  $\text{pDMA-BA}$  addition showing no exchange, to C) after 42 h at  $70^\circ\text{C}$  with further addition of  $\text{pDMA-BA}$  showing conversion to a ratio of 1:0.82 of  $\text{pDMA-BA}:\text{CO}_2$ .

C)  $[\text{Li}][1^*-\text{CO}_2] + [\text{Li}][1^*-\text{CyA}] + \text{CyA}$

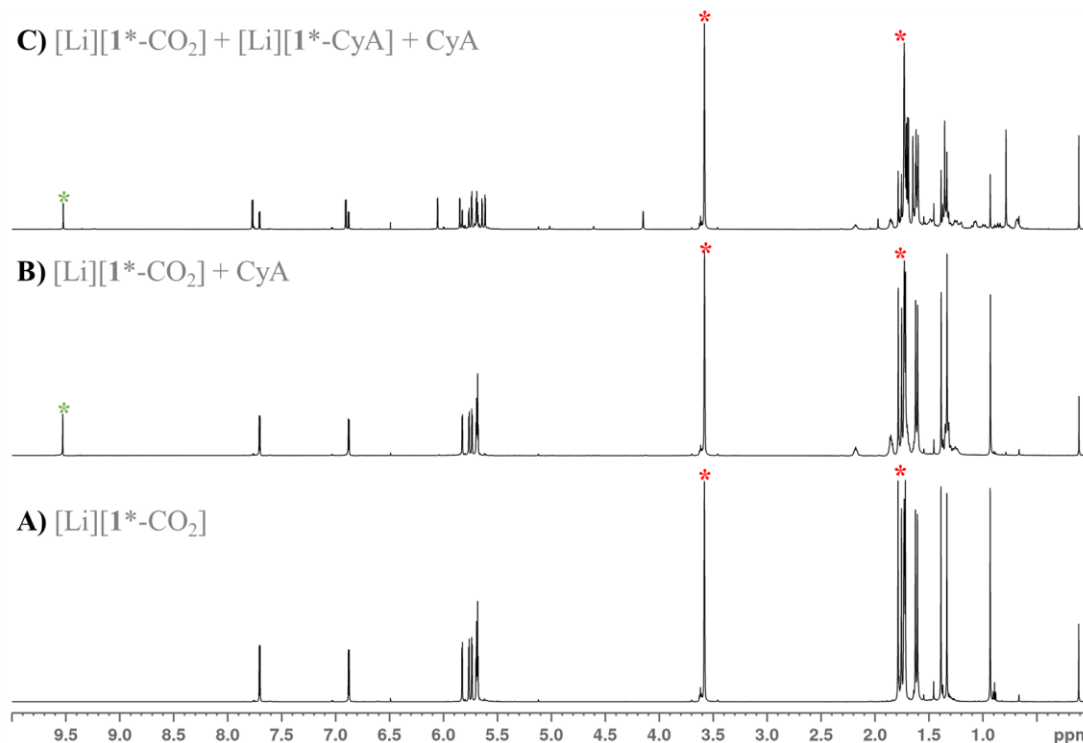

**Figure S 27:** Exchange of  $\text{CO}_2$  against  $\text{CyA}$  in  $\text{THF-d}_8$  at room temperature at  $[\text{Li}][1]$  followed by  $^1\text{H}$  NMR spectroscopy (600 MHz,  $\text{THF-d}_8$ , 295 K) from A) showing the pure  $\text{CO}_2$  adduct, to B) after three hours at rt after  $\text{CyA}$  addition showing no exchange, to C) after 42 h at  $70^\circ\text{C}$  showing conversion to a ratio of 1:0.56 of  $\text{CyA}:\text{CO}_2$ .

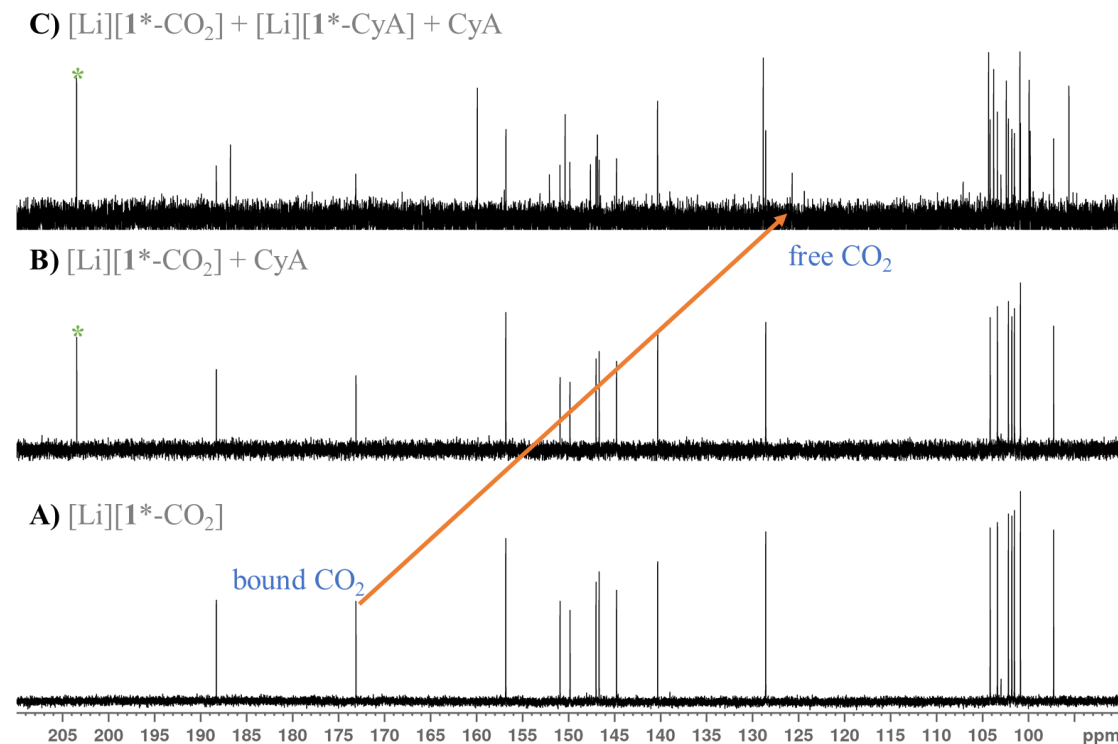

**Figure S 28:** Exchange of  $\text{CO}_2$  against CyA in  $\text{THF-}d_8$  at room temperature at  $[\text{Li}][1]$  followed by  $^{13}\text{C}\{^1\text{H}\}$  NMR spectroscopy (150 MHz,  $\text{THF-}d_8$ , 295 K) from A) showing the pure  $\text{CO}_2$  adduct, to B) after three hours at rt after CyA addition showing no exchange, to C) after 42 h at 70 °C showing conversion to a ratio of 1:0.56 of CyA: $\text{CO}_2$ .

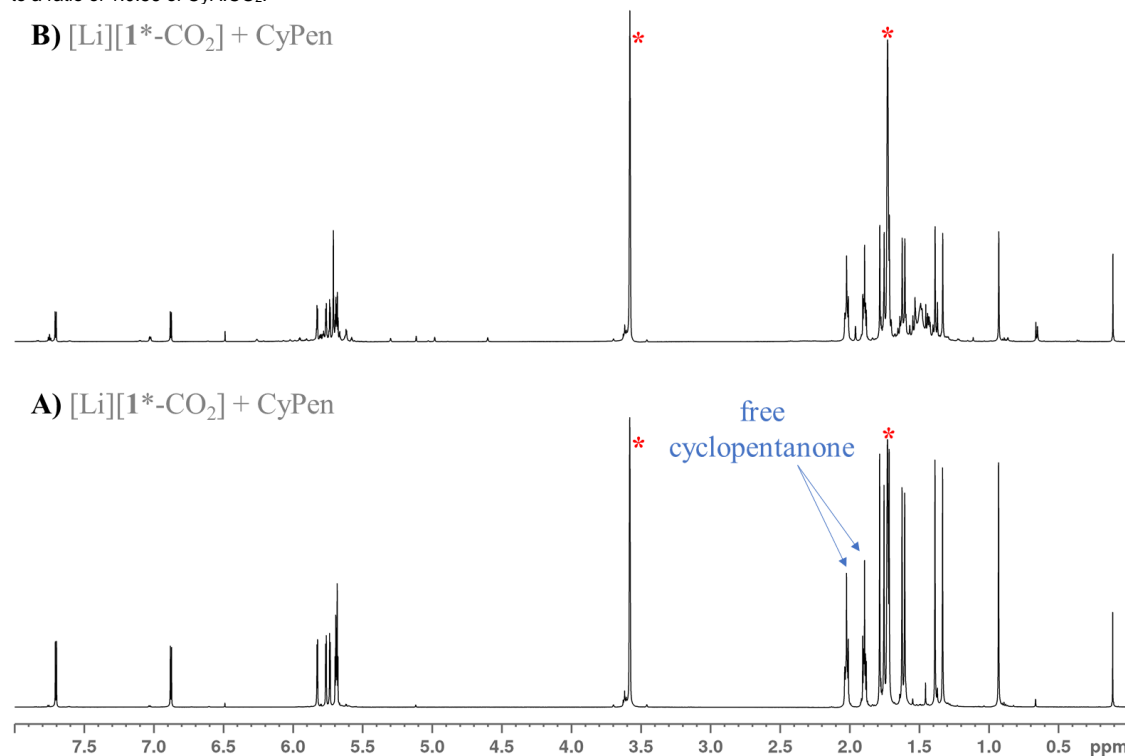

**Figure S 29:** Exchange of  $\text{CO}_2$  against CyPen in  $\text{THF-}d_8$  at room temperature at  $[\text{Li}][1]$  followed by  $^1\text{H}$  NMR spectroscopy (600 MHz,  $\text{THF-}d_8$ , 295 K) from A) showing the  $\text{CO}_2$  adduct at rt in presence of CyPen, to B) after 42 h at 70 °C showing no conversion.

**B) [Li][1\*-CO<sub>2</sub>] + CyPen**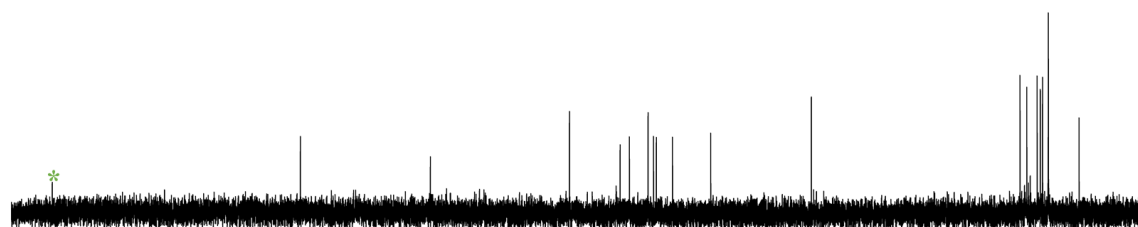**A) [Li][1\*-CO<sub>2</sub>] + CyPen**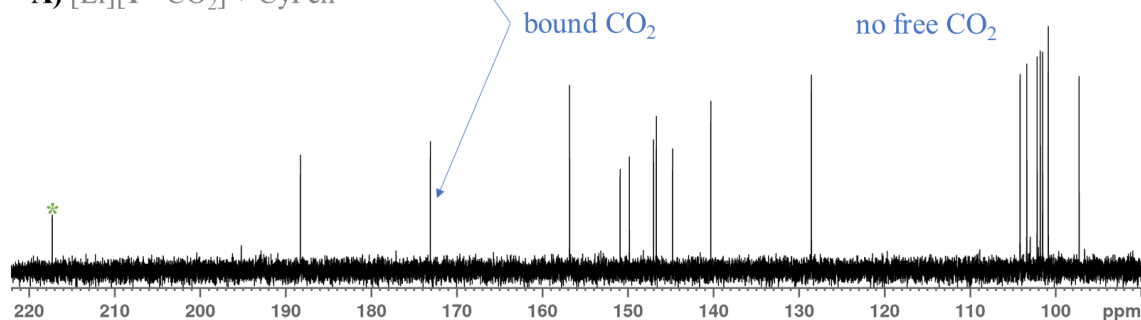

**Figure S 30:** Exchange of CO<sub>2</sub> against CyPen in THF-*d*<sub>8</sub> at room temperature at [Li][1] followed by <sup>13</sup>C{<sup>1</sup>H} NMR spectroscopy (150 MHz, THF-*d*<sub>8</sub>, 295 K) from A) showing the CO<sub>2</sub> adduct at rt in presence of CyPen, to B) after 42 h at 70 °C showing no conversion.

**C) [Li][1\*-CO<sub>2</sub>] + [Li][1\*-*p*Me-BA] + *p*Me-BA**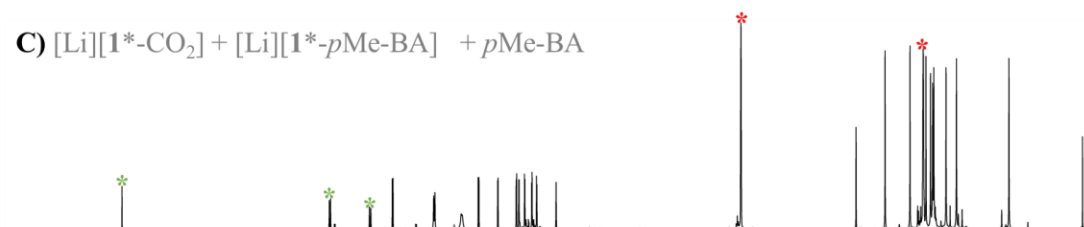**B) [Li][1\*-CO<sub>2</sub>] + *p*Me-BA**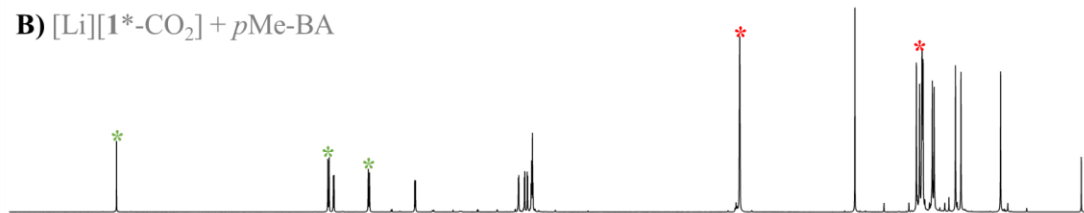**A) [Li][1\*-CO<sub>2</sub>]**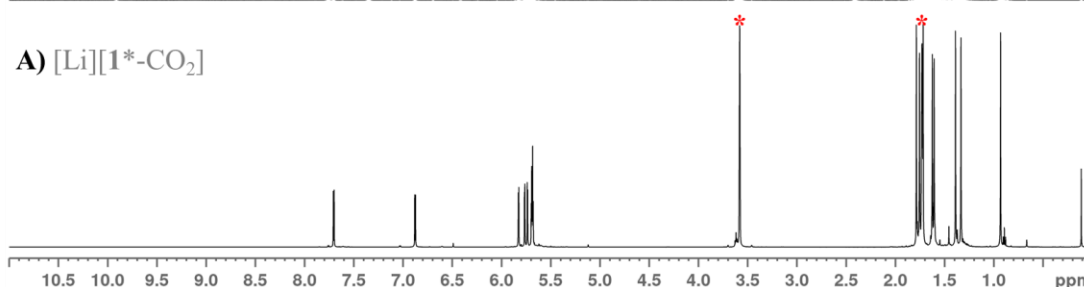

**Figure S 31:** Exchange of CO<sub>2</sub> against *p*Me-BA in THF-*d*<sub>8</sub> at room temperature at [Li][1] followed by <sup>1</sup>H NMR spectroscopy (600 MHz, THF-*d*<sub>8</sub>, 295 K) from A) showing the pure CO<sub>2</sub> adduct, to B) after three hours at rt after *p*Me-BA addition showing traces of exchange to C) after 29 h at 70 °C showing conversion to a ratio of 1:0.11 of *p*Me-BA:CO<sub>2</sub>.

C)  $[\text{Li}][\mathbf{1}^*-\text{CO}_2] + [\text{Li}][\mathbf{1}^*-\text{pMe-BA}] + \text{pMe-BA}$

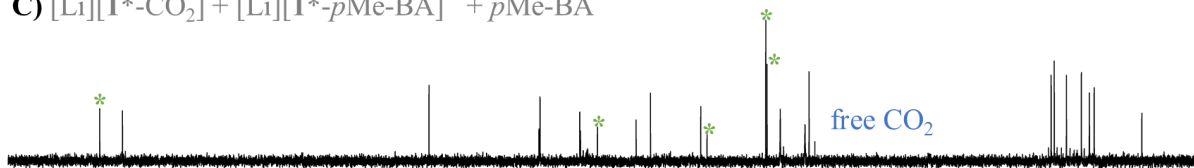

B)  $[\text{Li}][\mathbf{1}^*-\text{CO}_2] + \text{pMe-BA}$

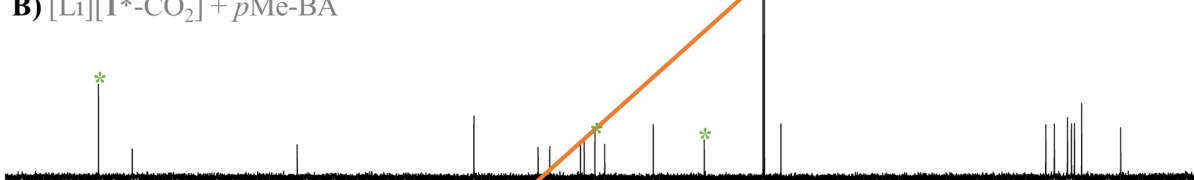

A)  $[\text{Li}][\mathbf{1}^*-\text{CO}_2]$

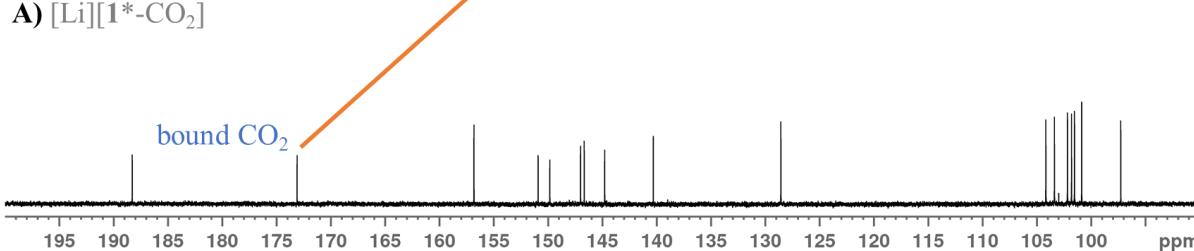

**Figure S 32:** Exchange of  $\text{CO}_2$  against *p*Me-BA in  $\text{THF-}d_8$  at room temperature at  $[\text{Li}][\mathbf{1}]$  followed by  $^{13}\text{C}\{^1\text{H}\}$  NMR spectroscopy (150 MHz,  $\text{THF-}d_8$ , 295 K) from A) showing the pure  $\text{CO}_2$  adduct, to B) after three hours at rt after *p*Me-BA addition showing traces of exchange, to C) after 29 h at 70 °C showing conversion to a ratio of 1:0.11 of *p*Me-BA: $\text{CO}_2$ .

B)  $[\text{Li}][\mathbf{1}^*-\text{CO}_2] + \text{acetone}$

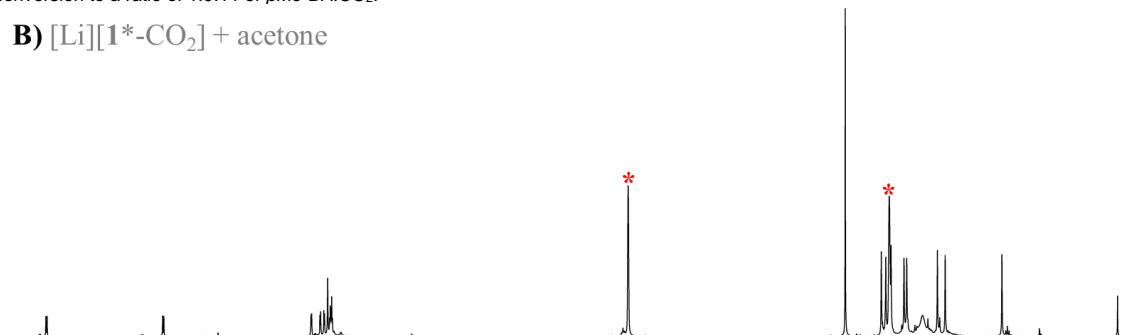

A)  $[\text{Li}][\mathbf{1}^*-\text{CO}_2] + \text{acetone}$

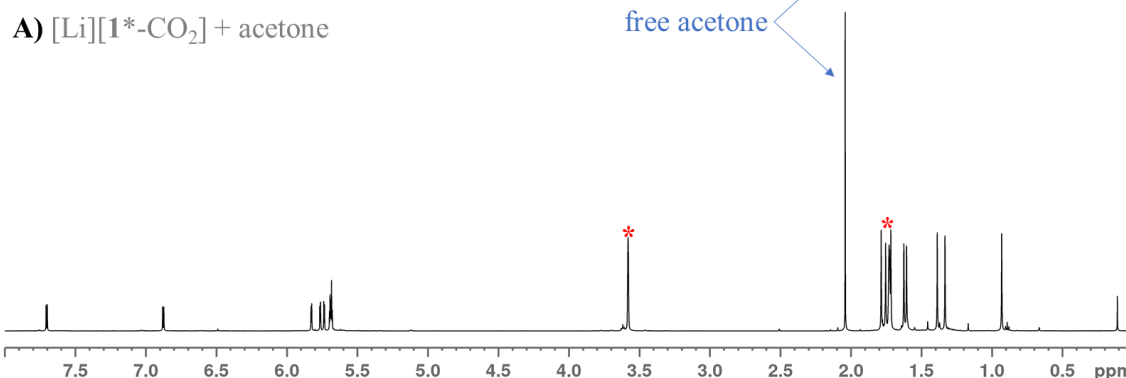

**Figure S 33:** Exchange of  $\text{CO}_2$  against acetone in  $\text{THF-}d_8$  at room temperature at  $[\text{Li}][\mathbf{1}]$  followed by  $^1\text{H}$  NMR spectroscopy (600 MHz,  $\text{THF-}d_8$ , 295 K) from A) showing the  $\text{CO}_2$  adduct in presence of acetone at rt to B) after 34 h at 70 °C showing no replacement of  $\text{CO}_2$ .

**B)** [Li][1\*-CO<sub>2</sub>] + acetone

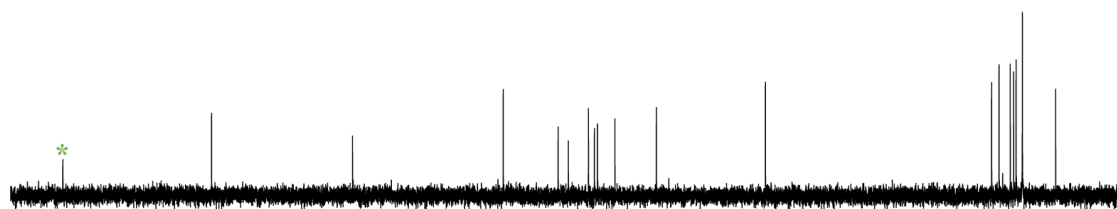

**A)** [Li][1\*-CO<sub>2</sub>] + acetone

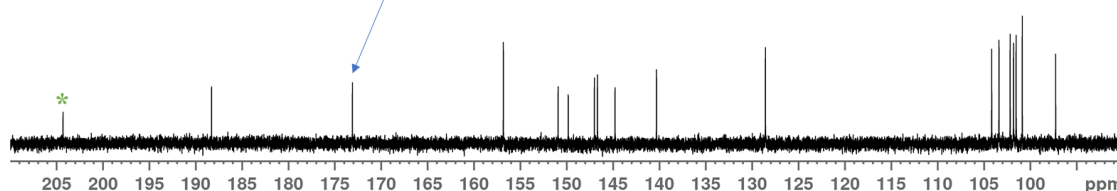

**Figure S 34:** Exchange of CO<sub>2</sub> against acetone in THF-*d*<sub>8</sub> at room temperature at [Li][1] followed by <sup>13</sup>C{<sup>1</sup>H} NMR spectroscopy (150 MHz, THF-*d*<sub>8</sub>, 295 K) from A) showing the CO<sub>2</sub> adduct in presence of acetone at rt, to B) after 34 h at 70 °C showing no replacement of CO<sub>2</sub>.

**B)** [Li][1\*-*p*DMA-BA] + acetone

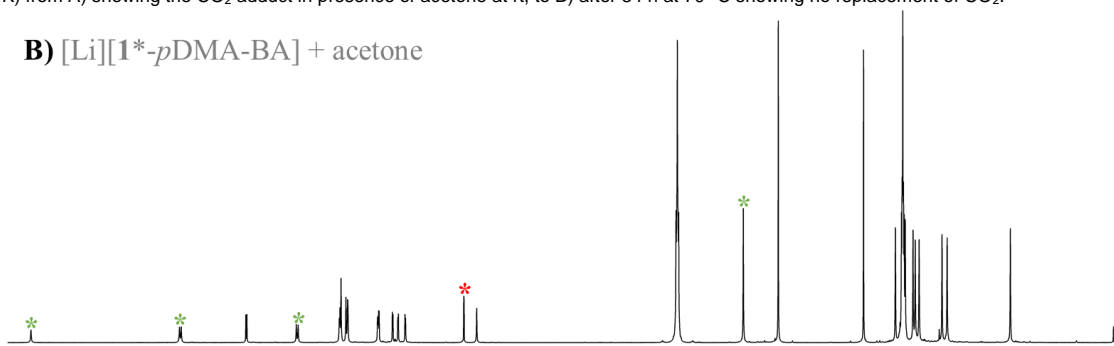

**A)** [Li][1\*-acetone]

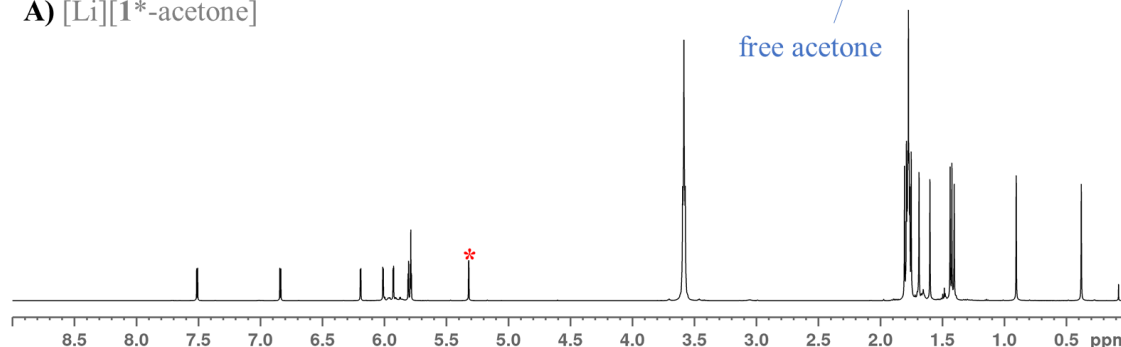

**Figure S 35:** Exchange of acetone against *p*DMA-BA in DCM-*d*<sub>2</sub> at room temperature at [Li][1] followed by <sup>1</sup>H NMR spectroscopy (600 MHz, DCM-*d*<sub>2</sub>, 295 K) from A) showing the acetone adduct, to B) after addition of *p*DMA-BA at rt showing full conversion to the *p*DMA-BA adduct.

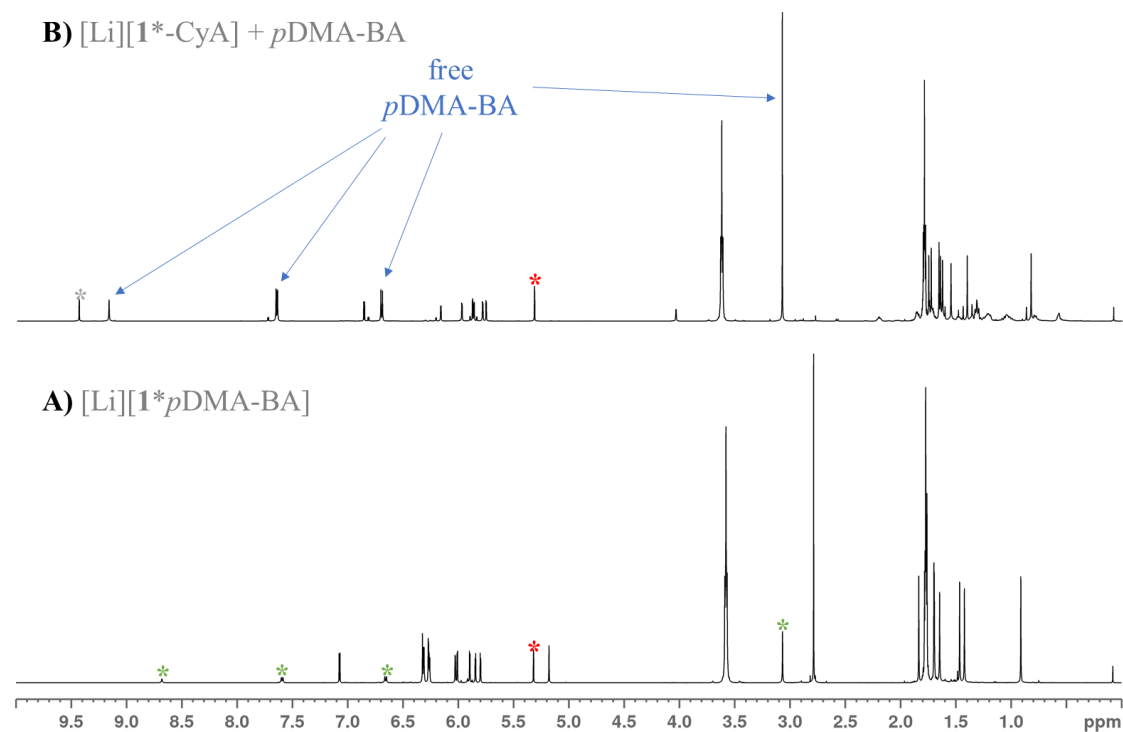

**Figure S 36:** Exchange of *p*DMA-BA against CyA in DCM-*d*<sub>2</sub> at room temperature at [Li][1] followed by <sup>1</sup>H NMR spectroscopy (600 MHz, DCM-*d*<sub>2</sub>, 295 K) from A) showing the *p*DMA-BA adduct, to B) after addition of CyA at rt showing full conversion to the CyA adduct. The grey asterisks mark a small excess of CyA, which is irrelevant for the studied reaction.

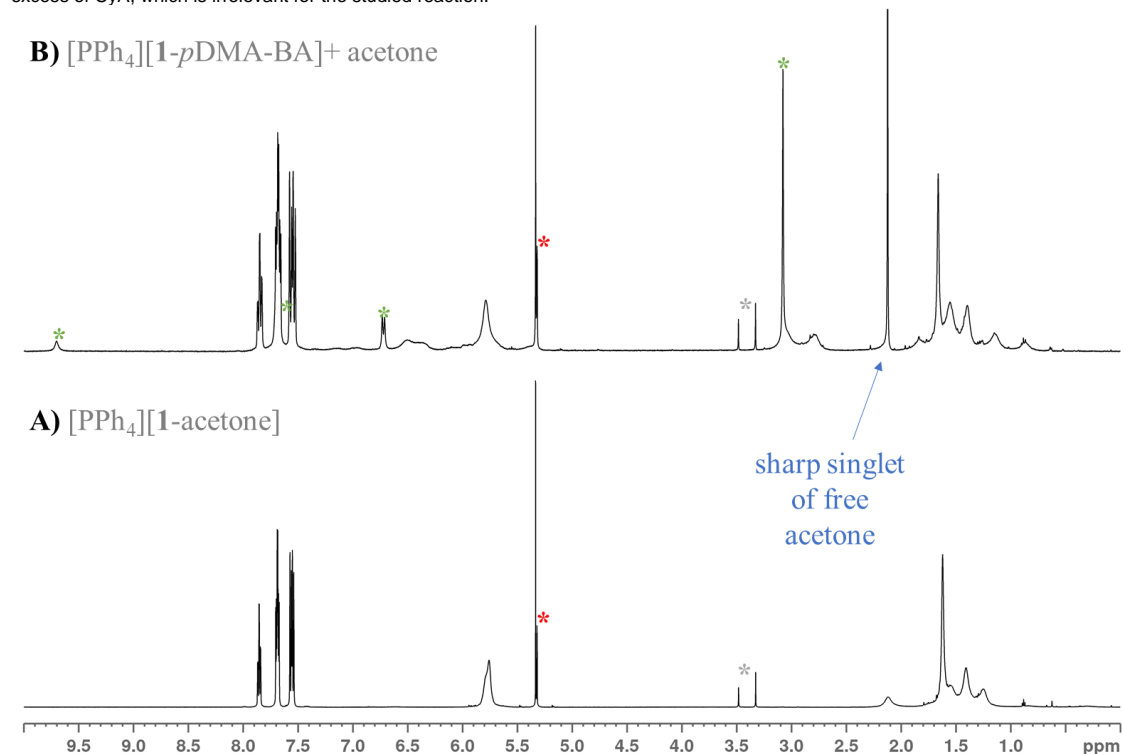

**Figure S 37:** Exchange of acetone against *p*DMA-BA in DCM-*d*<sub>2</sub> at room temperature at [PPh<sub>4</sub>][1] followed by <sup>1</sup>H NMR spectroscopy (600 MHz, DCM-*d*<sub>2</sub>, 295 K) from A), showing the acetone adduct, to B), after addition of *p*DMA-BA at rt showing full conversion to the *p*DMA-BA adduct. The grey asterisk indicates present dimethoxyethane, which is irrelevant for the studied reaction.

**B)**  $[\text{PPh}_4][1^*-\text{CyA}] + p\text{DMA-BA}$

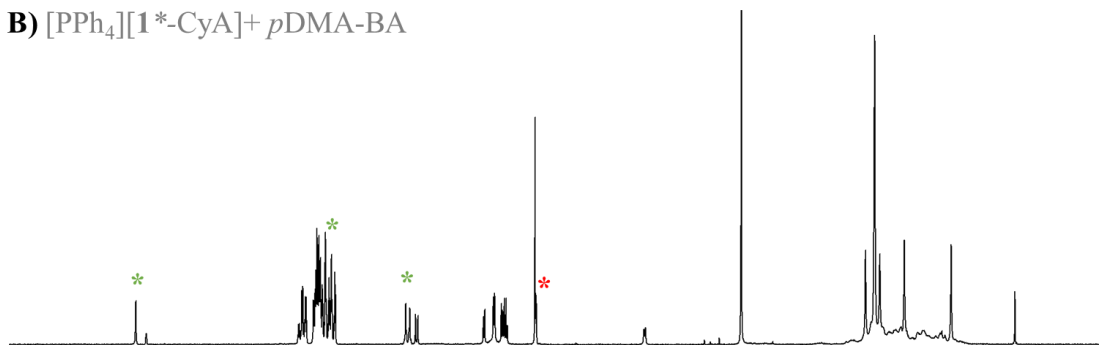

**A)**  $[\text{PPh}_4][1-p\text{DMA-BA}]$

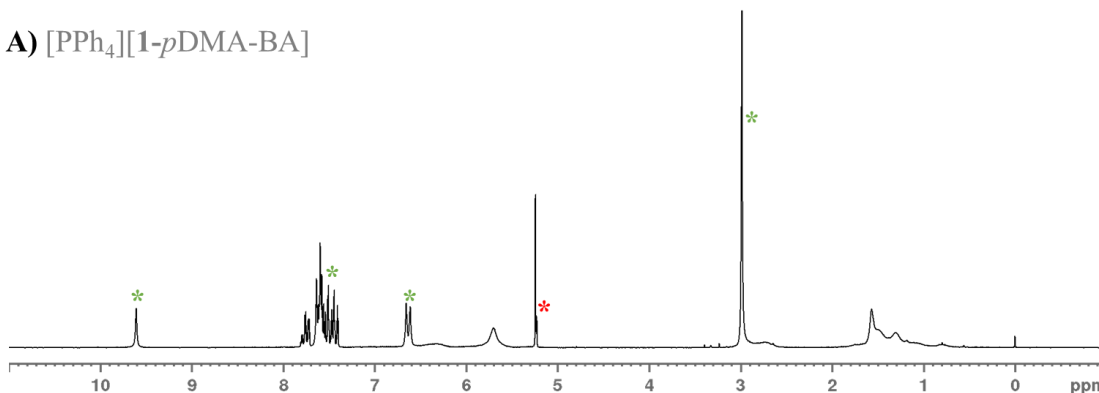

**Figure S 38:** Exchange of *p*DMA-BA against CyA in  $\text{DCM-}d_2$  at room temperature at  $[\text{PPh}_4][1]$  followed by  $^1\text{H}$  NMR spectroscopy (200 MHz,  $\text{DCM-}d_2$ , 295 K) from A) showing the *p*DMA-BA adduct, to B) after addition of CyA at rt showing full conversion to the CyA adduct.

**B)**  $[\text{PPh}_4][1^*-\text{CyA}] + [\text{PPh}_4][1^*-\text{pMe-BA}]$

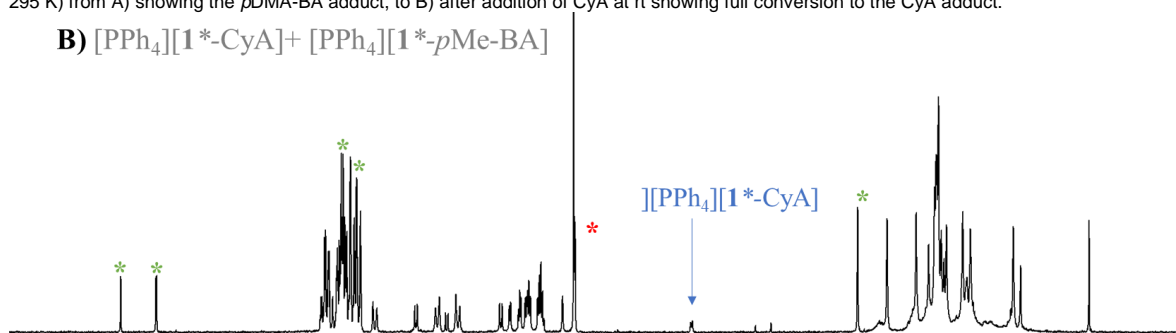

**A)**  $[\text{PPh}_4][1-p\text{Me-BA}]$

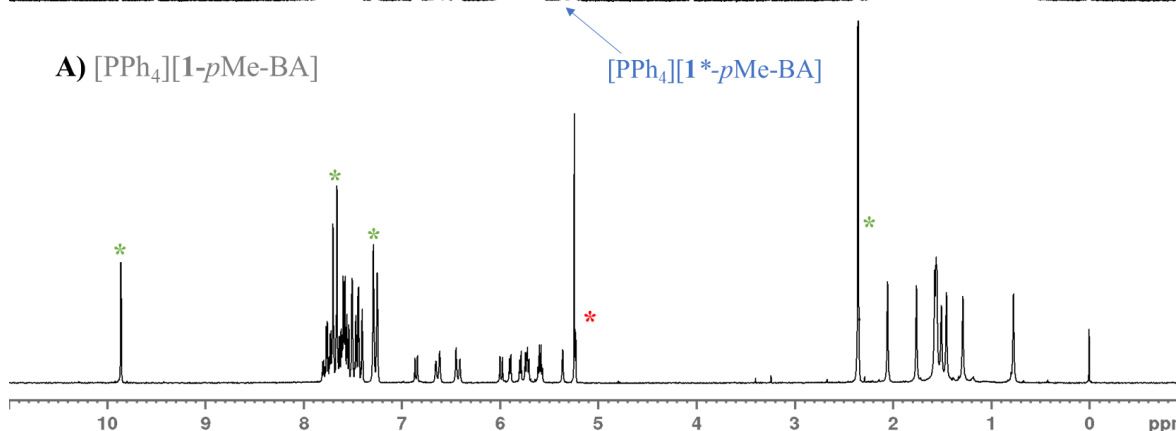

**Figure S 39:** Exchange of *p*Me-BA against CyA in  $\text{DCM-}d_2$  at room temperature at  $[\text{PPh}_4][1]$  recorded by  $^1\text{H}$  NMR spectroscopy (200 MHz,  $\text{DCM-}d_2$ , 295 K). A) is showing the *p*Me-BA adduct as a reference spectrum, B) is after the addition of CyA at rt showing an equilibrium of both adducts in ratio 1:0.25 *p*Me-BA: CyA.

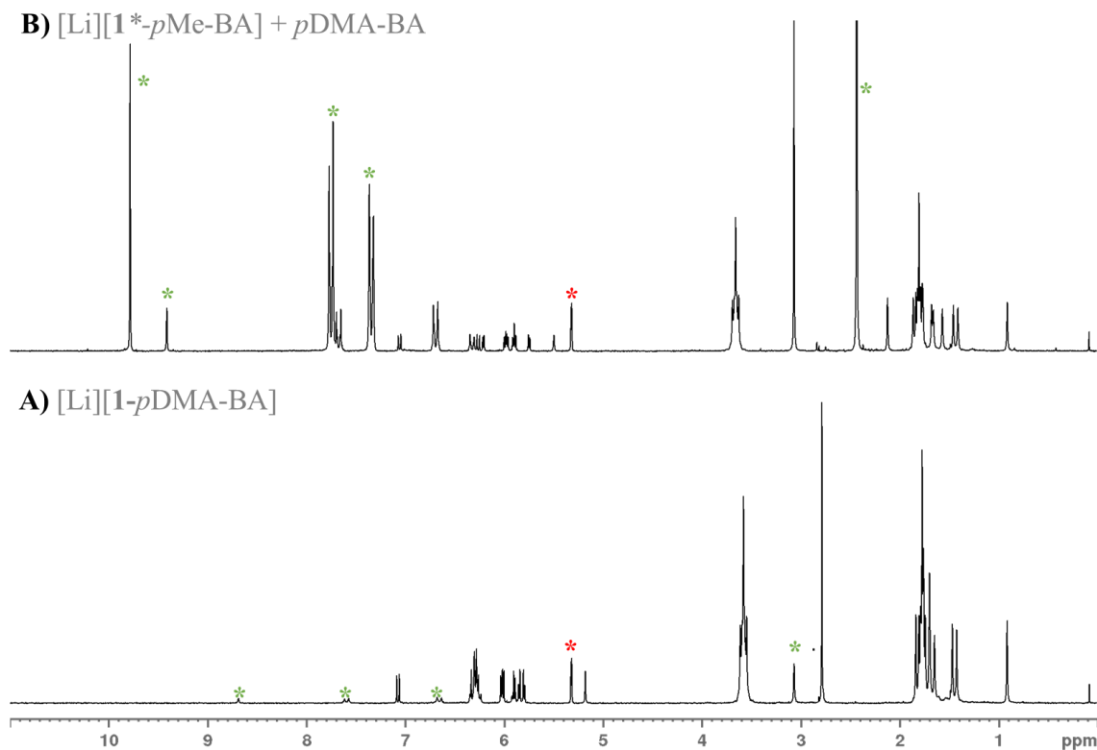

**Figure S 40:** Exchange of *p*DMA-BA against *p*Me-BA in DCM-*d*<sub>2</sub> at room temperature at [Li][1] studied by <sup>1</sup>H NMR spectroscopy (200 MHz, DCM-*d*<sub>2</sub>, 295 K). A) is showing the *p*DMA-BA adduct as a reference spectrum, B) is after the addition of *p*Me-BA at rt showing full exchange to the *p*Me-BA adduct.

## 9. Hydroboration kinetics

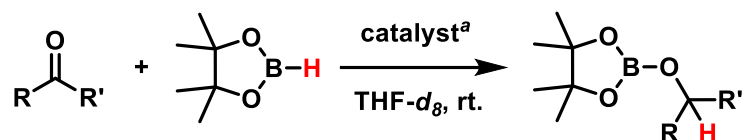**Table S 3:** Overview of determined reaction indicators, conditions and reactions.

| entry | R                            | R'              | cation           | catalyst 1 [mol%] | time [h] <sup>b</sup> | TOF [h <sup>-1</sup> ] |
|-------|------------------------------|-----------------|------------------|-------------------|-----------------------|------------------------|
| 1     | <i>p</i> NMe <sub>2</sub> Ph | H               | Li               | 0.05              | 0.43                  | > 4500                 |
| 2     | <i>p</i> NO <sub>2</sub> Ph  | H               | Li               | 0.05              | 19.9                  | 100                    |
| 3     | CH <sub>3</sub>              | CH <sub>3</sub> | Li               | 0.05              | 1.01                  | 2000                   |
| 4     | O (CO <sub>2</sub> )         | -               | PPh <sub>4</sub> | 0.05              | 24 <sup>c</sup>       | 0.12                   |
| 5     | <i>p</i> NMe <sub>2</sub> Ph | H               | PPh <sub>4</sub> | 0.05              | 7.8 <sup>d</sup>      | 90                     |
| 6     | <i>p</i> NO <sub>2</sub> Ph  | H               | PPh <sub>4</sub> | 0.05              | 38                    | 52                     |
| 7     | CH <sub>3</sub>              | CH <sub>3</sub> | PPh <sub>4</sub> | 0.05              | 6.1 <sup>e</sup>      | 45                     |

<sup>a</sup>Hbpin = 0.30 mmol, substrate = 0.10 mmol, 0.6 mL of solvent<sup>b</sup>time for complete substrate consumption, detected by <sup>1</sup>H NMR<sup>c</sup>time for 3 TON<sup>d</sup>completeness of reaction 35 %<sup>e</sup>completeness of reaction 25 %

All reactions were performed under inert gas atmosphere in J.-Young NMR tubes. Due to poor solubility of [PPh<sub>4</sub>][1] in THF, the stock solution was set up in DCM and added to the reaction mixture in THF. Analysis of the spectra was performed with Dynamics center v.2.5.5 BRUKER software.

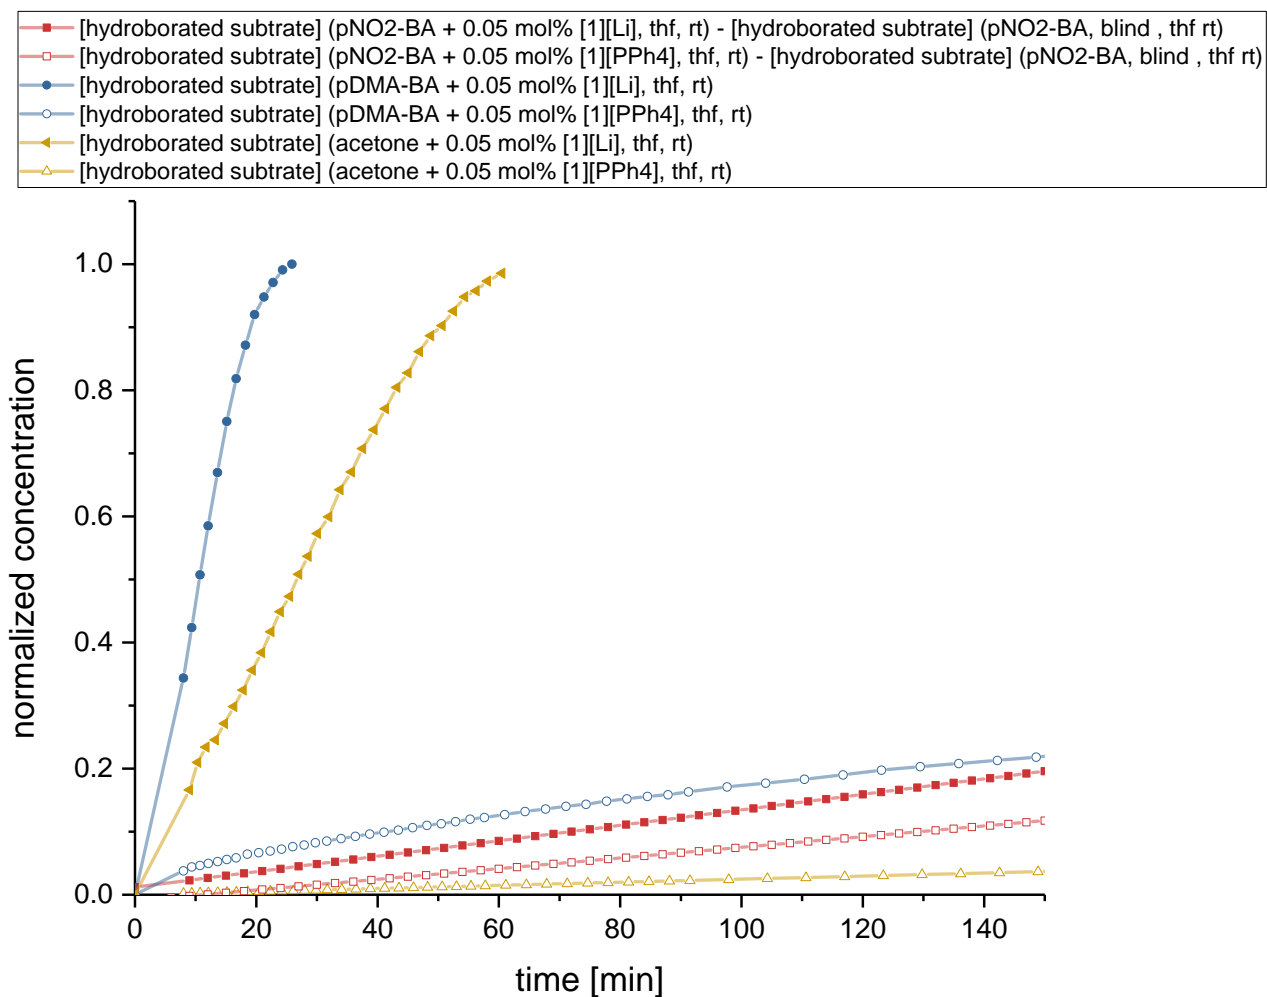

**Figure S 41:** Concentration profile of hydroboration reactions products with 0.05 mol% [1] as [Li<sup>+</sup>] or [PPh<sub>4</sub><sup>+</sup>] salt in thf. Profiles are determined *via* <sup>1</sup>H NMR spectroscopy (200 MHz, THF-*d*<sub>6</sub>, 295 K).

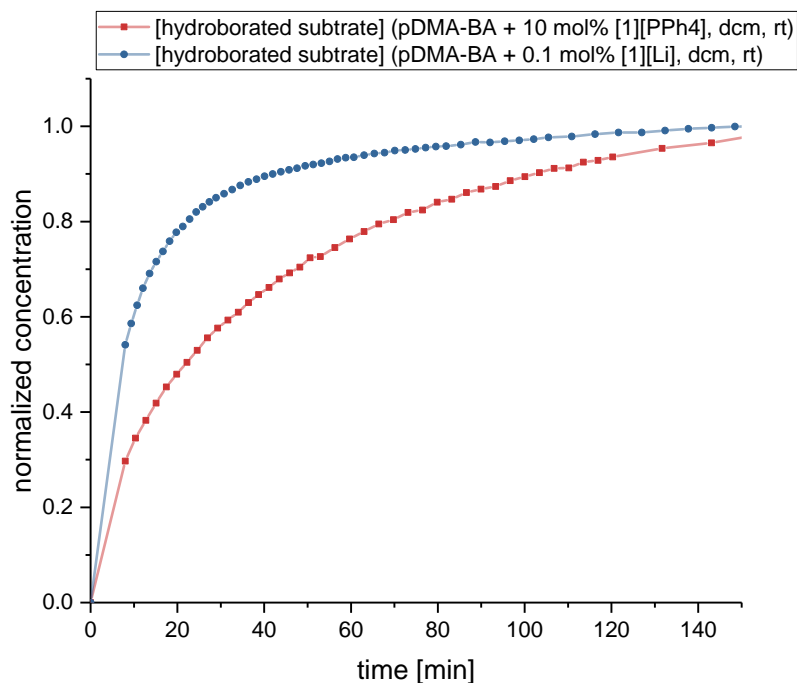

**Figure S 42:** Concentration profile of hydroboration reaction products of *p*DMA-BA with different concentrations of [1] as [Li<sup>+</sup>] or [PPh<sub>4</sub><sup>+</sup>] salt in thf. Profiles are determined via <sup>1</sup>H NMR spectroscopy (200 MHz, THF-*d*<sub>8</sub>, 295 K).

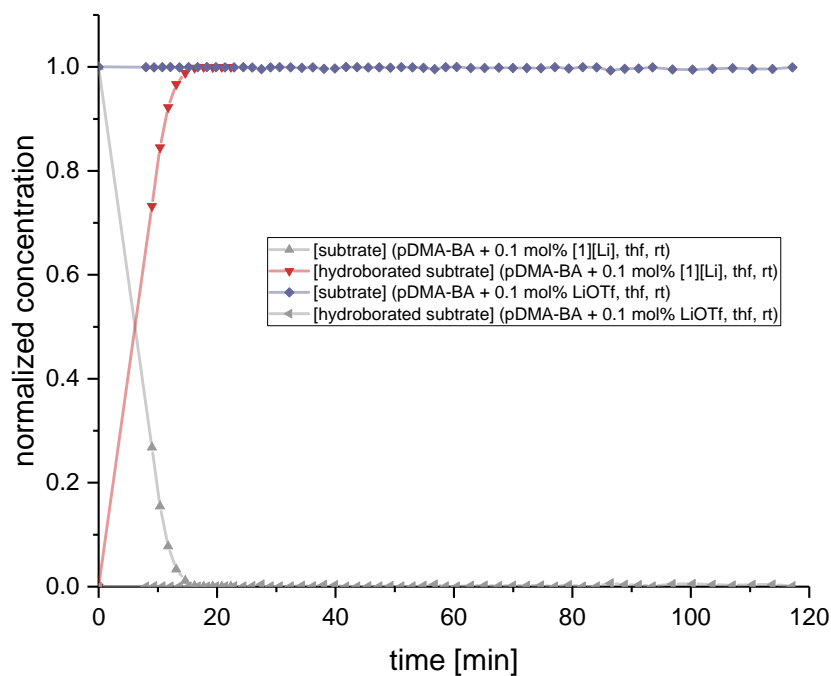

**Figure S 43:** Concentration profile of hydroboration reaction products of *p*DMA-BA with 0.1 mol% [Li][1] and 0.1 mol% [Li][OTf] in thf. Profiles are determined via <sup>1</sup>H NMR spectroscopy (200 MHz, THF-*d*<sub>8</sub>, 295 K).

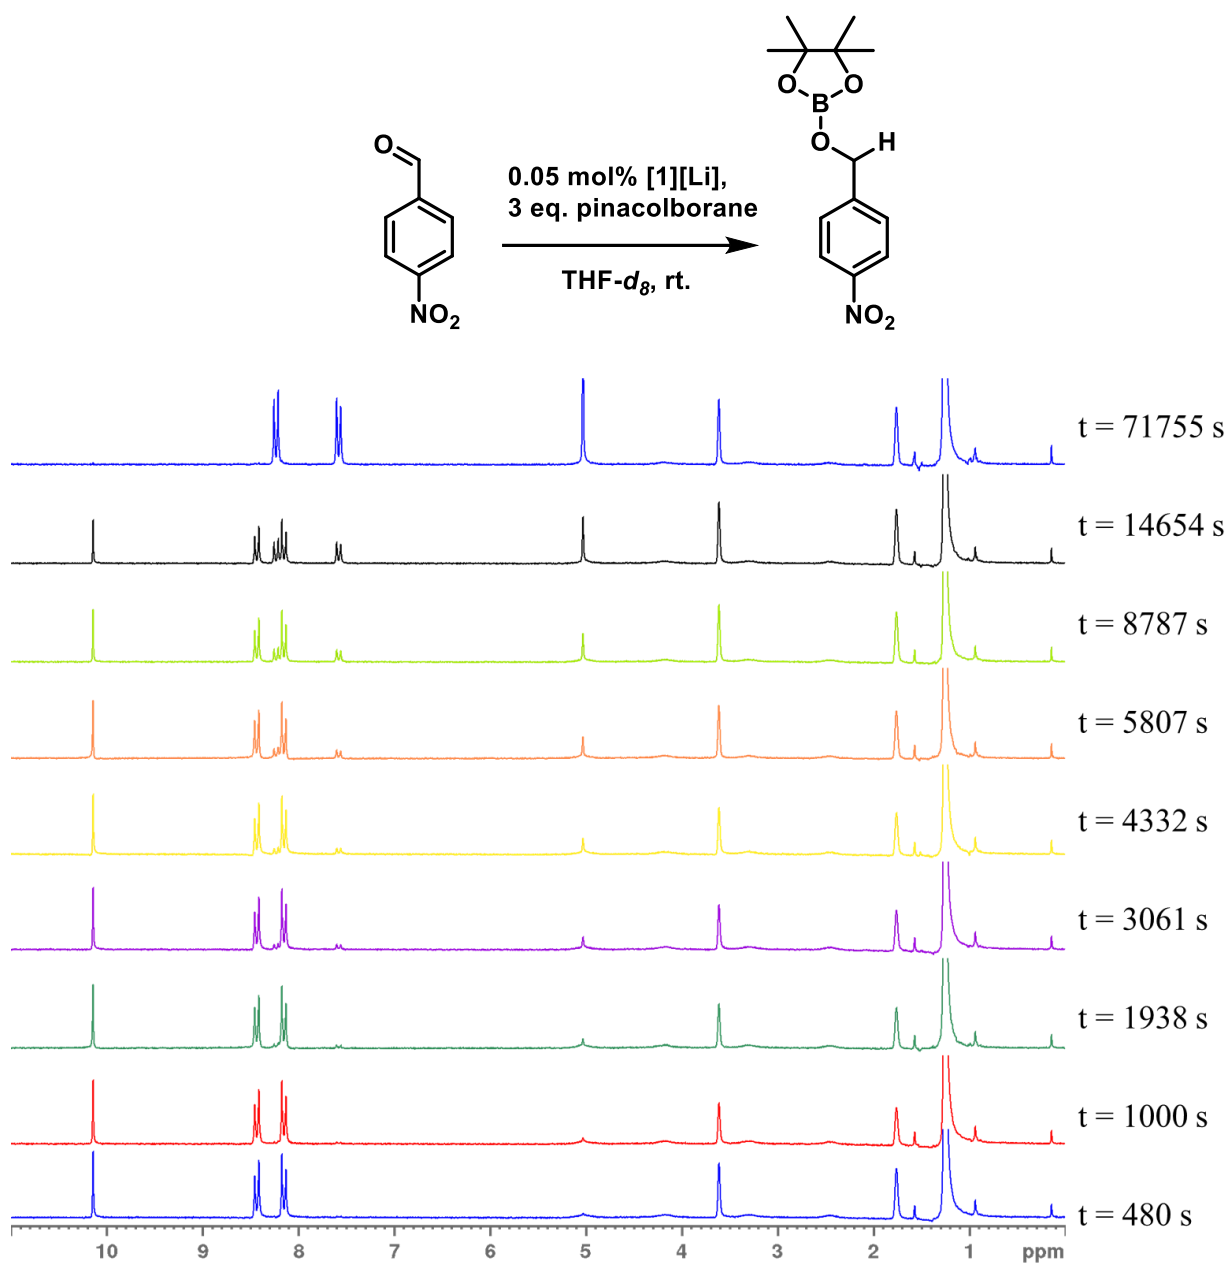

**Figure S 44:** Hydroboration of *p*NO<sub>2</sub>-BA with 0.05 mol% [Li][1] followed over time by <sup>1</sup>H NMR spectroscopy (200 MHz, THF-*d*<sub>8</sub>, 295 K).

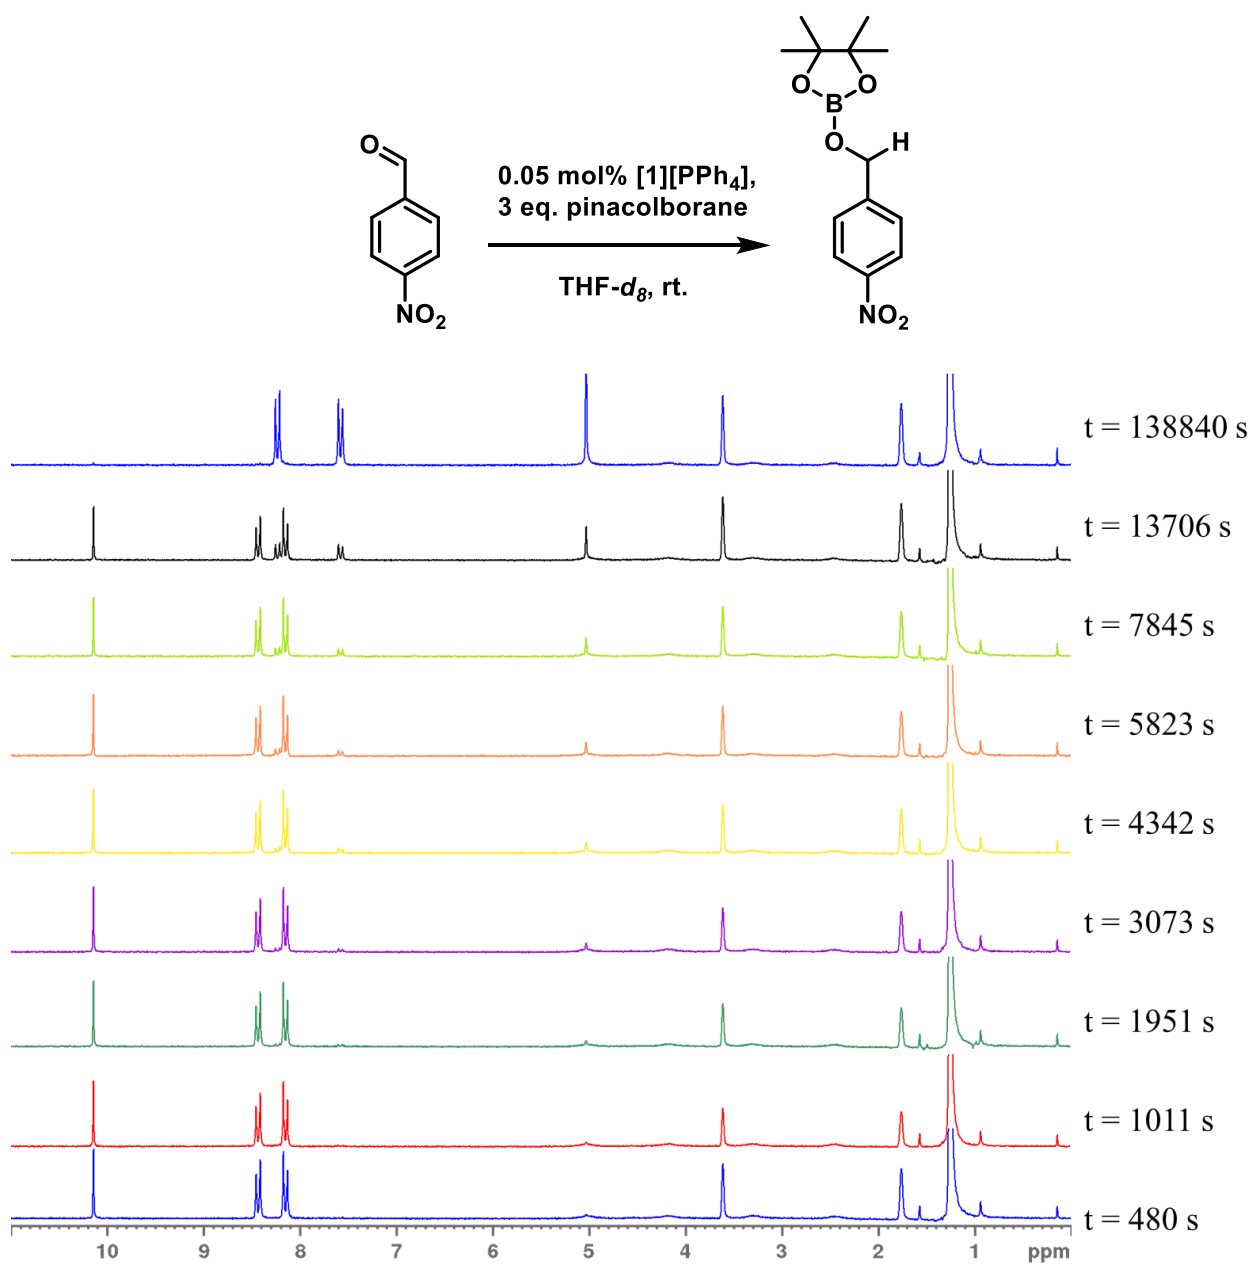

**Figure S 45:** Hydroboration of *p*NO<sub>2</sub>-BA with 0.05 mol% [PPh<sub>4</sub>][1] followed over time by <sup>1</sup>H NMR spectroscopy (200 MHz, THF-*d*<sub>8</sub>, 295 K).

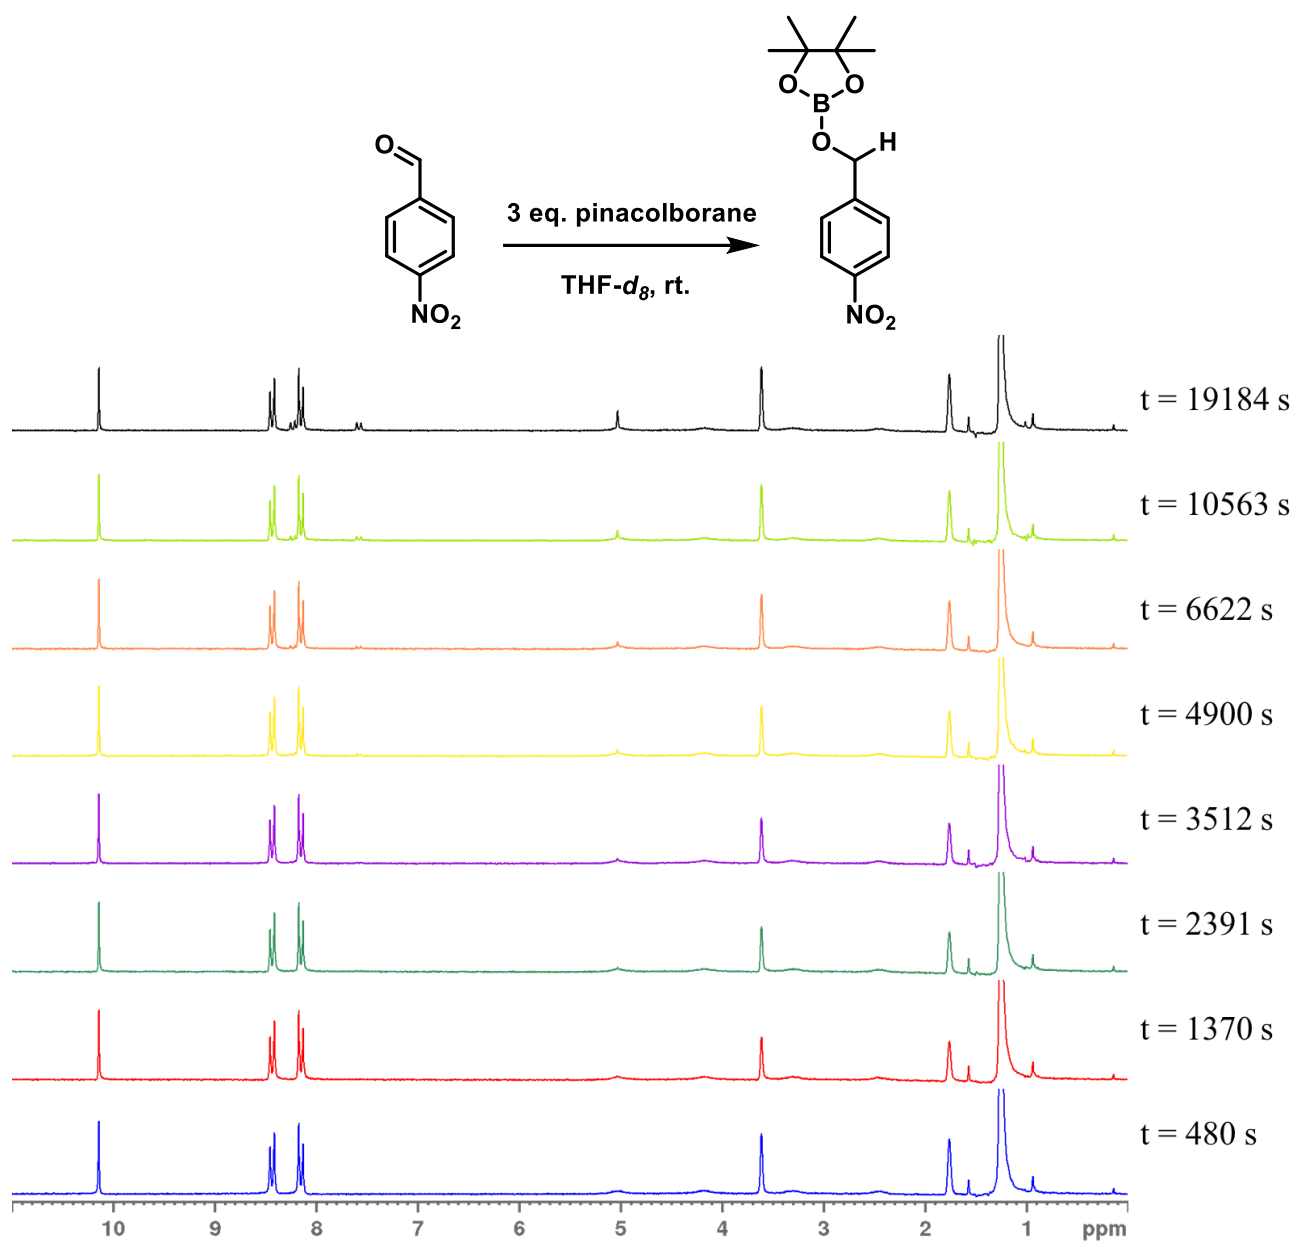

**Figure S 46:** Self hydroboration of *p*NO<sub>2</sub>-BA followed over time by <sup>1</sup>H NMR spectroscopy (200 MHz, THF-*d*<sub>8</sub>, 295 K).

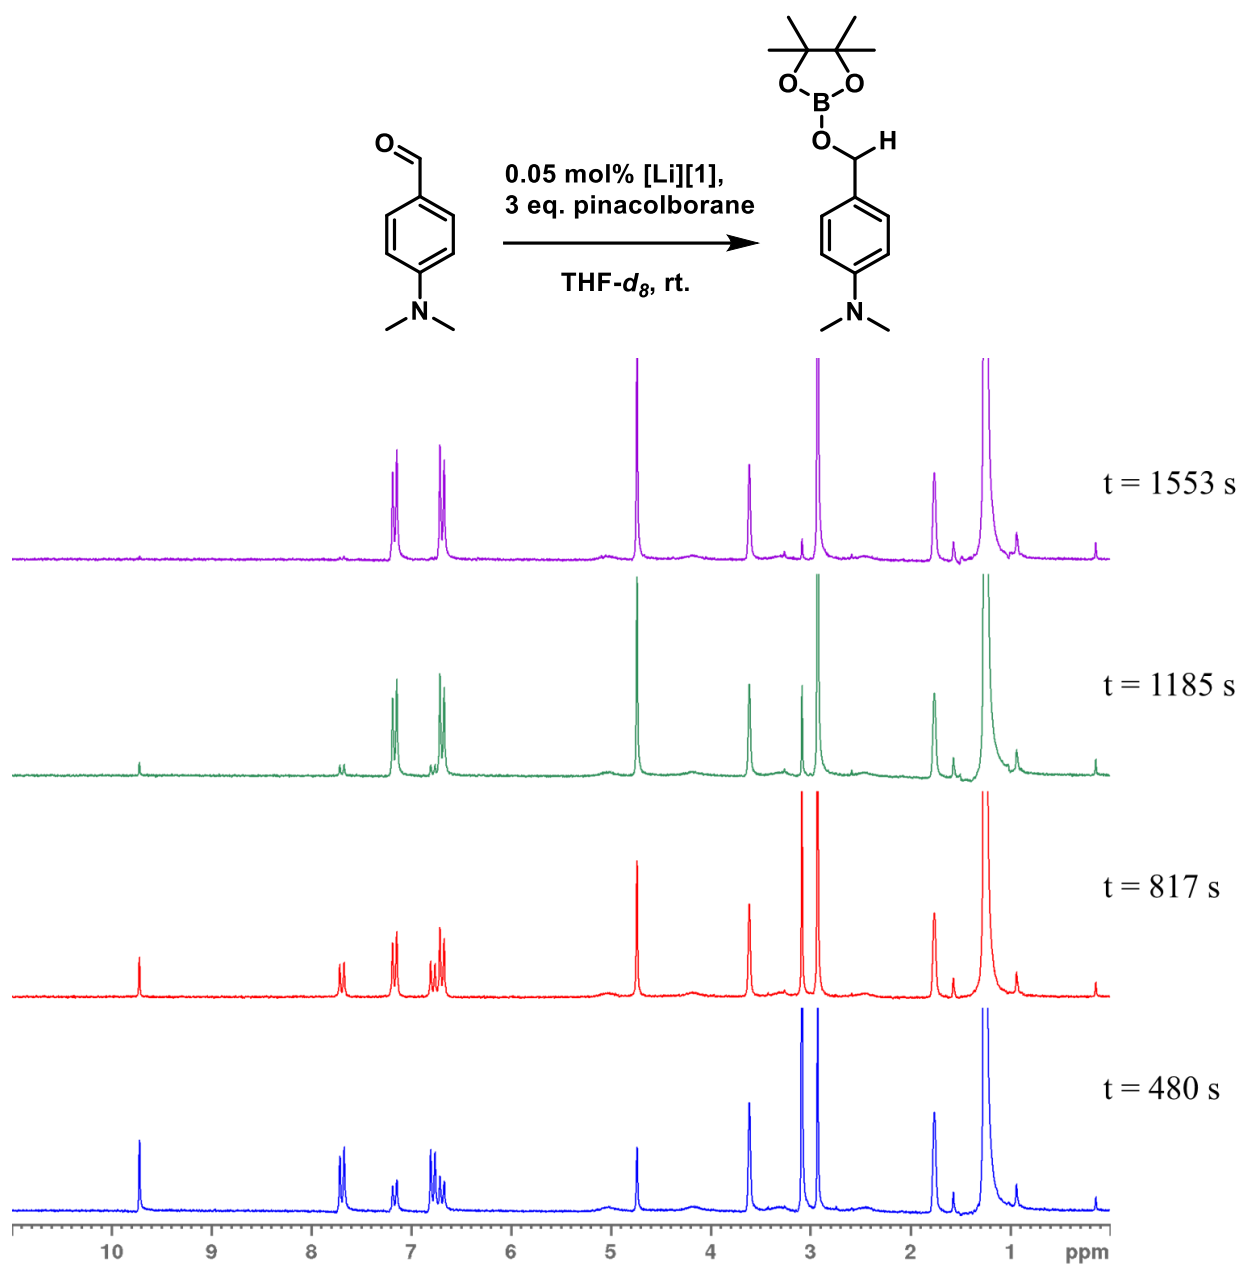

**Figure S 47:** Hydroboration of *p*DMA-BA with 0.05 mol% [Li][1] followed over time by <sup>1</sup>H NMR spectroscopy (200 MHz, THF-*d*<sub>8</sub>, 295 K).

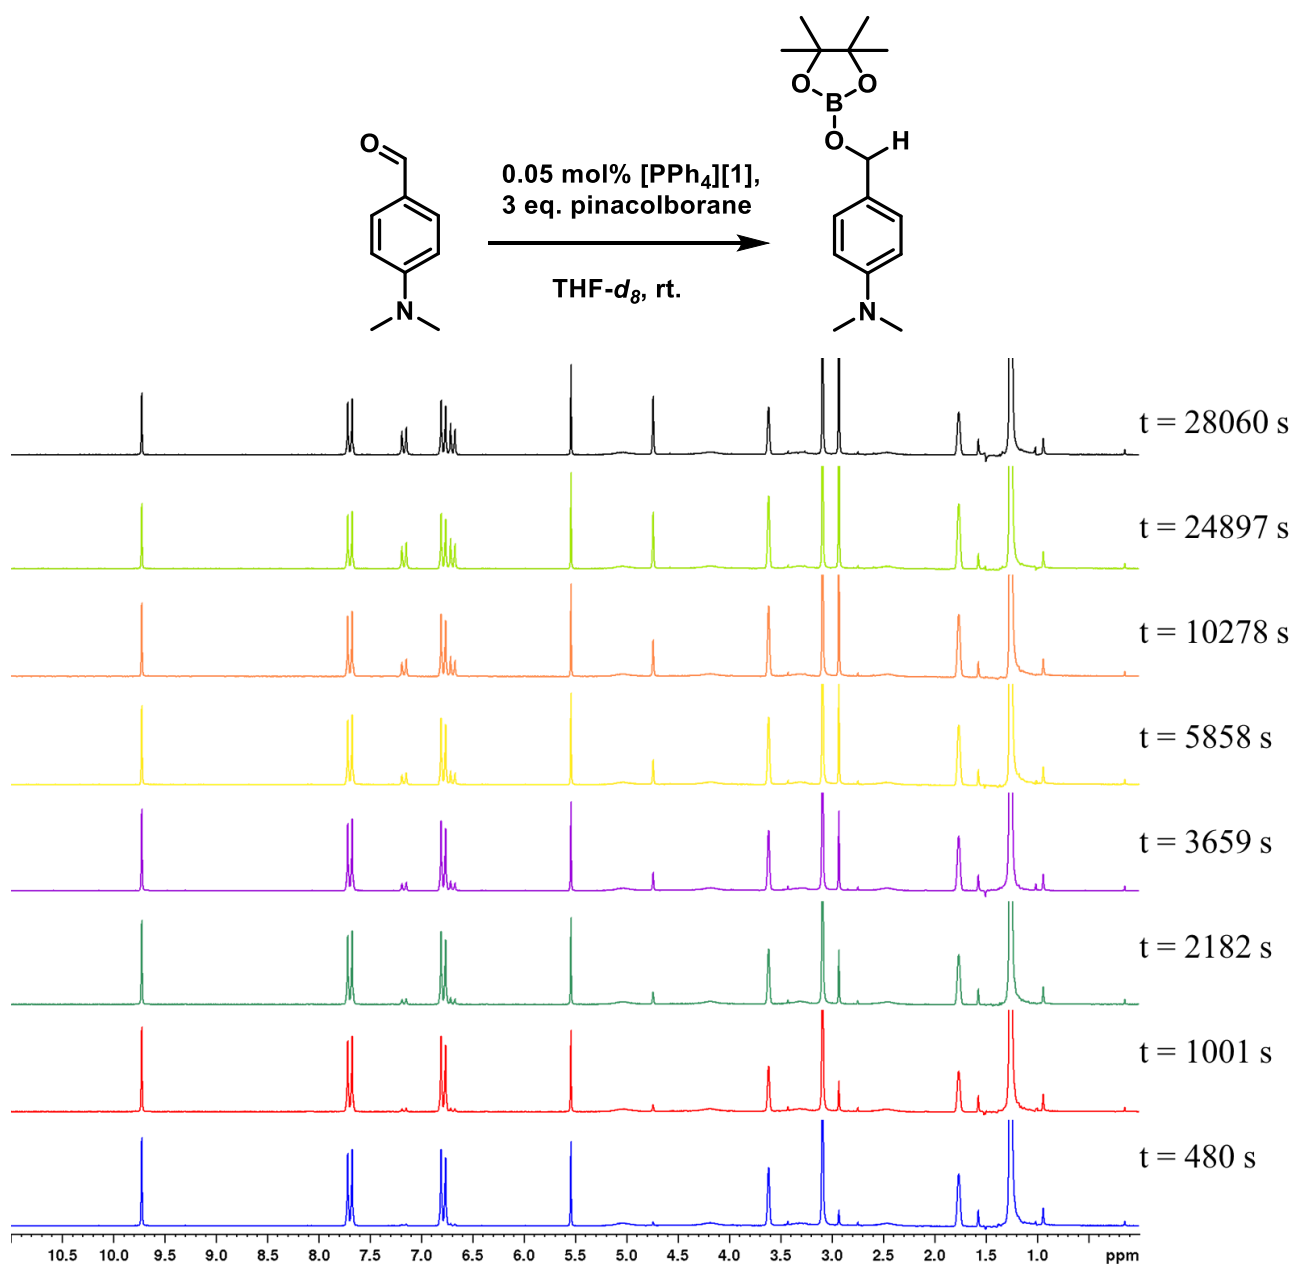

**Figure S 48:** Hydroboration of *p*DMA-BA with 0.05 mol% [PPh<sub>4</sub>][1] followed over time by <sup>1</sup>H NMR spectroscopy (200 MHz, THF-*d*<sub>8</sub>, 295 K).

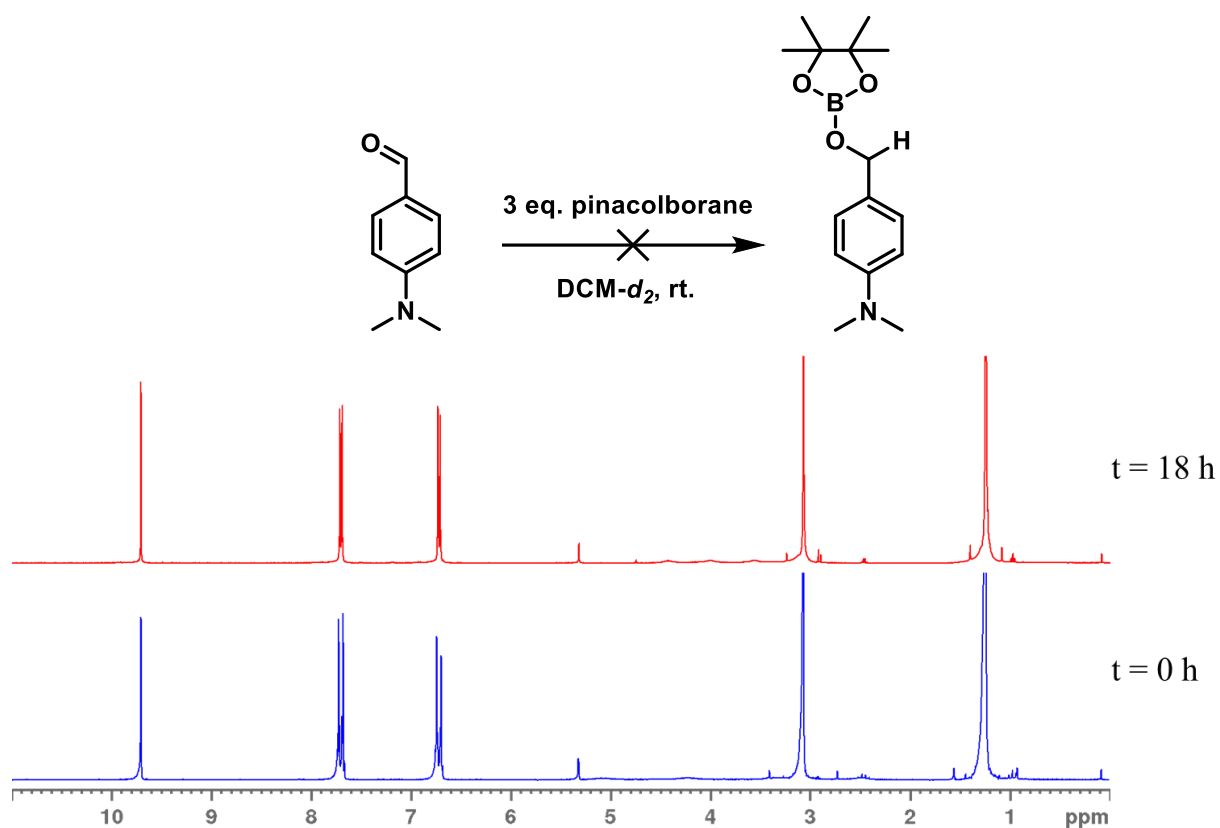

**Figure S 49:** No reaction between pinacolborane and pDMA-BA was detected by  $^1\text{H}$  NMR spectroscopy (200 MHz,  $\text{THF-}d_8$ , 295 K).

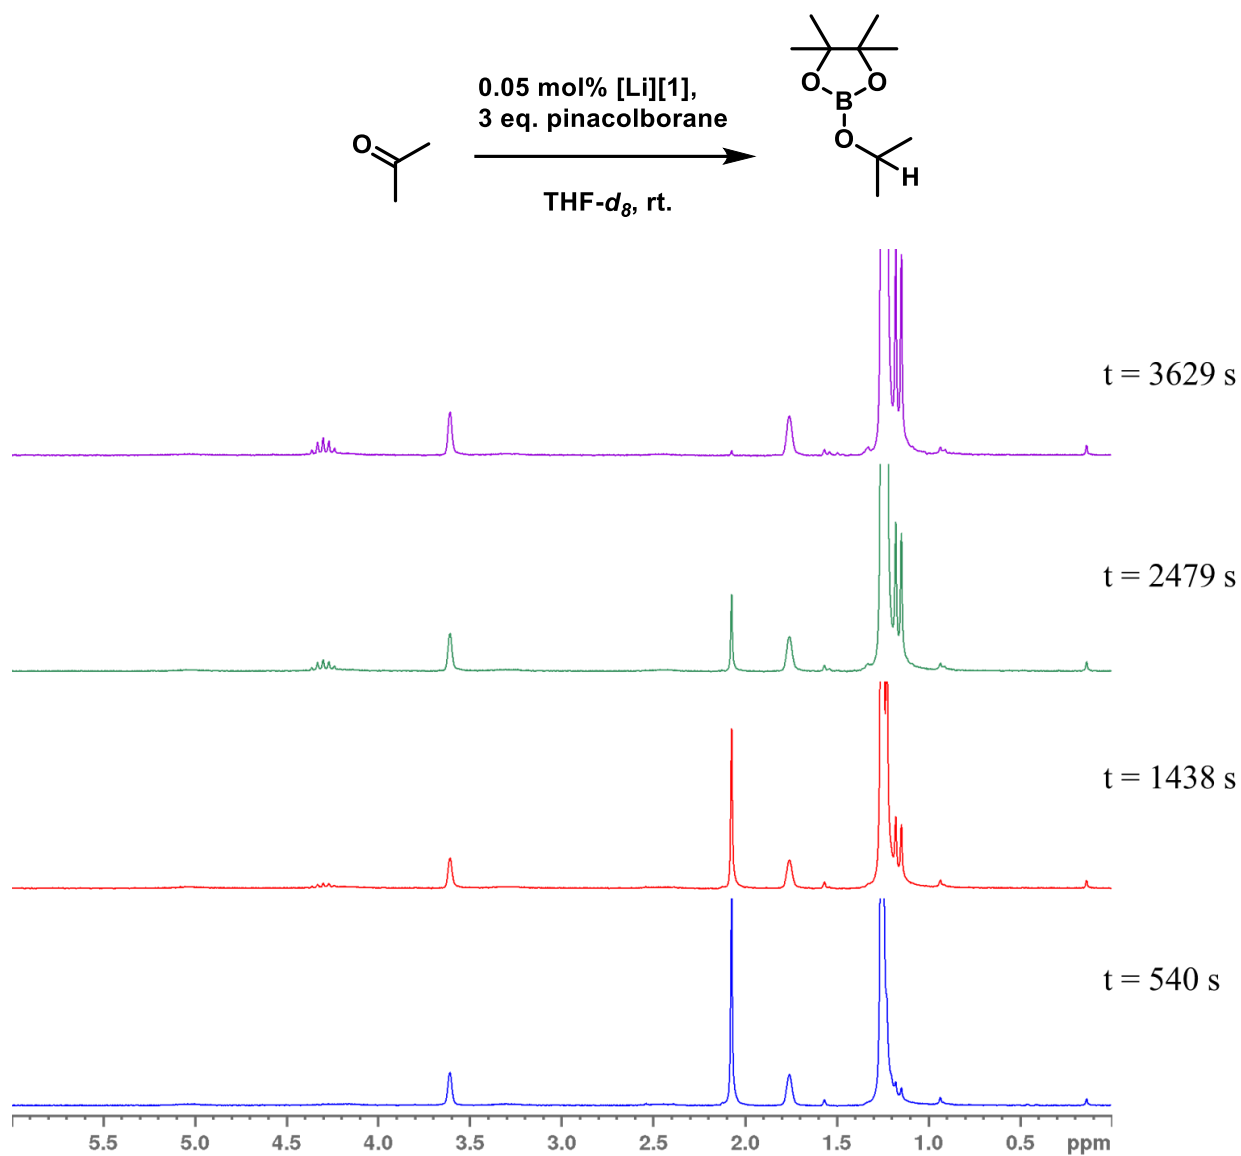

**Figure S 50:** Hydroboration of acetone with 0.05 mol% [Li][1] followed over time by  $^1\text{H}$  NMR spectroscopy (200 MHz, THF- $d_8$ , 295 K).

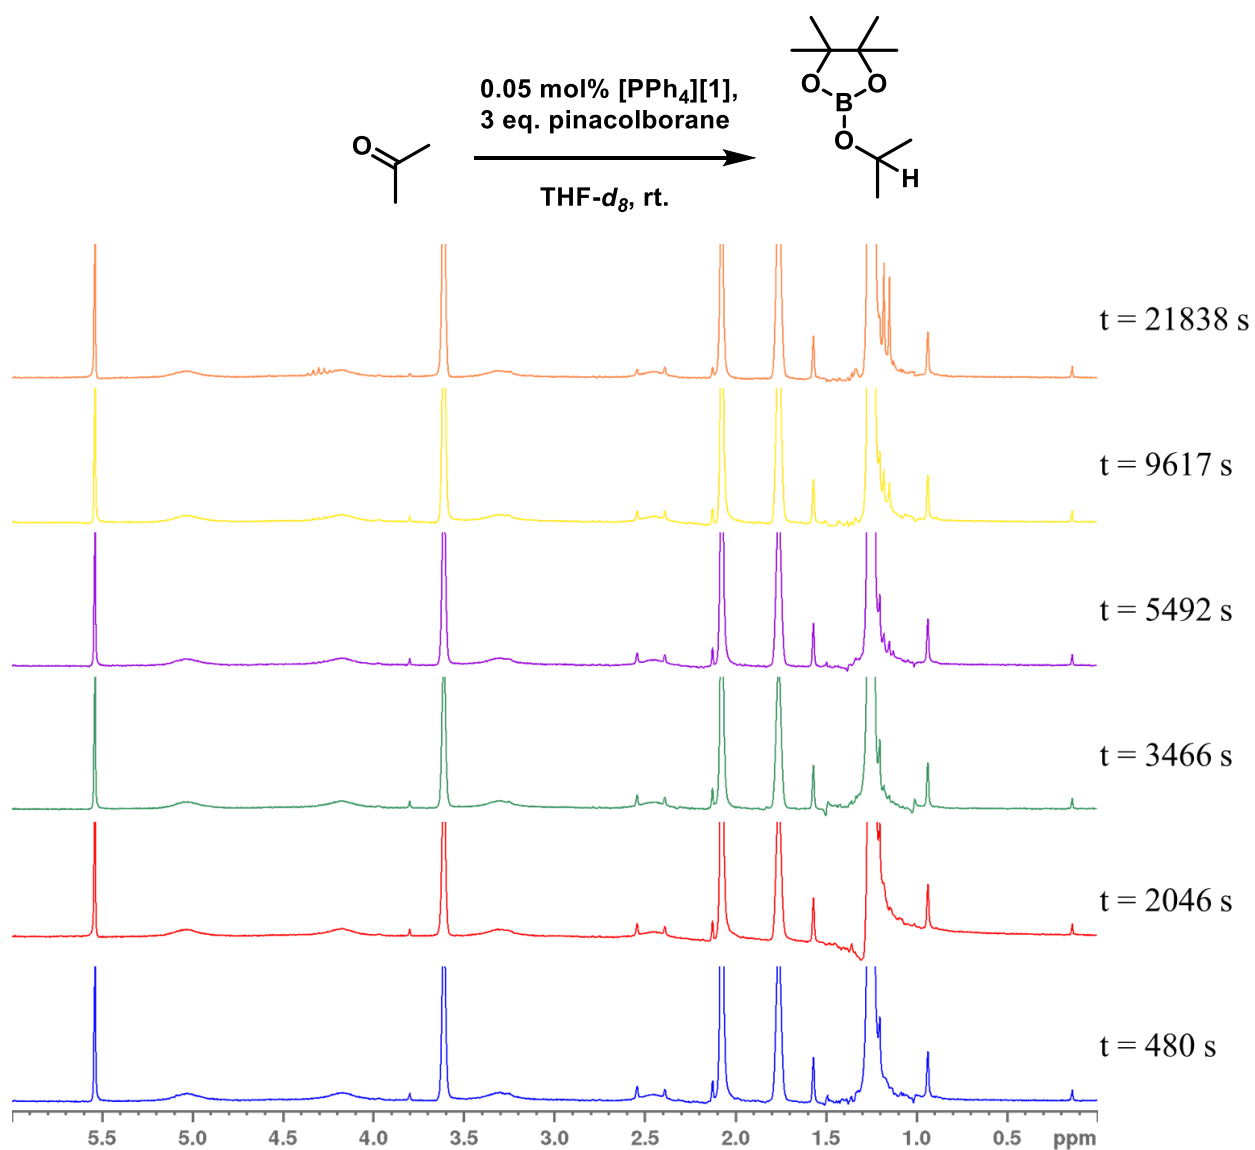

**Figure S 51:** Hydroboration of acetone with 0.05 mol% [PPh<sub>4</sub>][1] followed over time by <sup>1</sup>H NMR spectroscopy (200 MHz, THF-*d*<sub>8</sub>, 295 K).

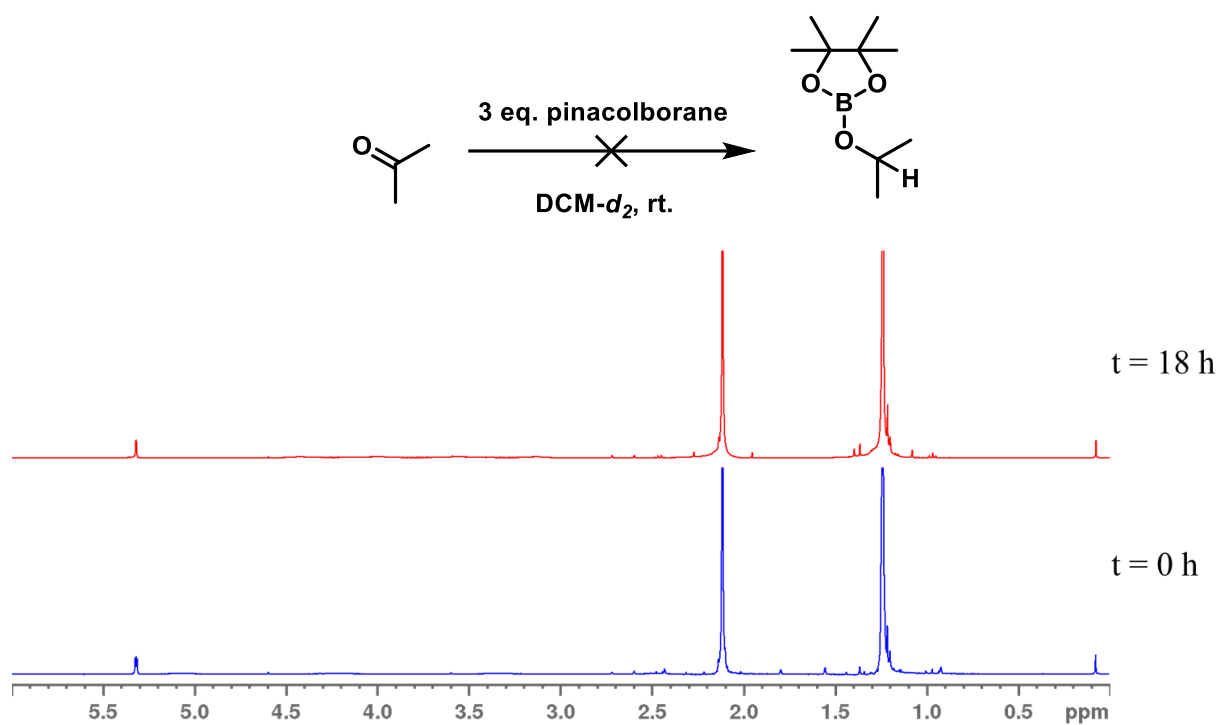

**Figure S 52:** No reaction between pinacolborane and acetone was detected by  $^1\text{H}$  NMR spectroscopy (200 MHz,  $\text{THF}-d_8$ , 295 K).

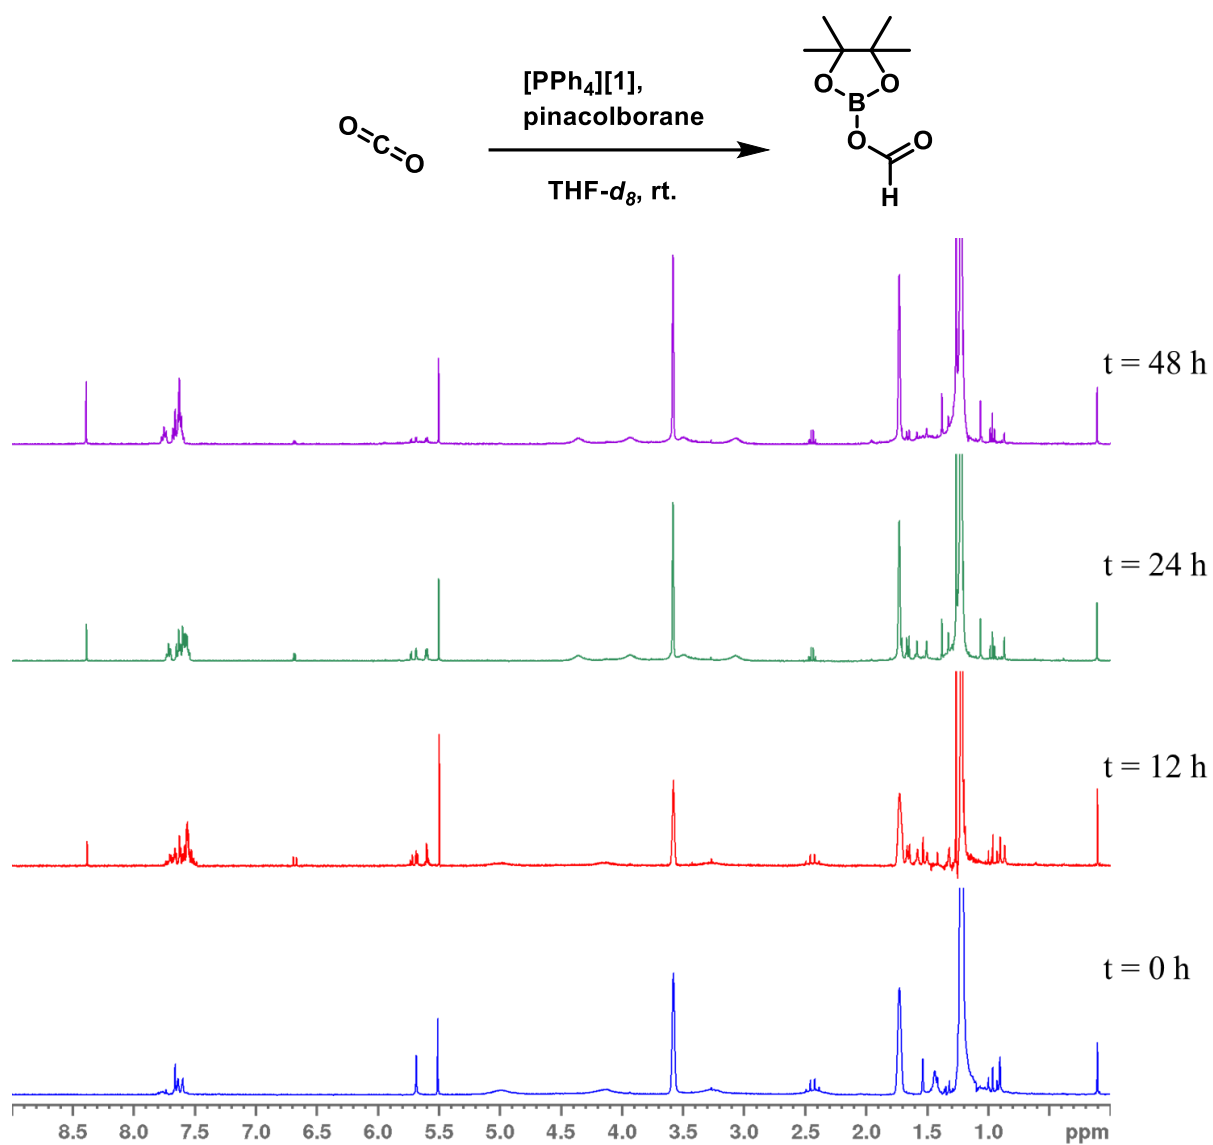

**Figure S 53:** Hydroboration of  $\text{CO}_2$  with  $[\text{PPh}_4][1]$  followed over time by  $^1\text{H}$  NMR spectroscopy (200/400 MHz,  $\text{THF-}d_8$ , 295 K).

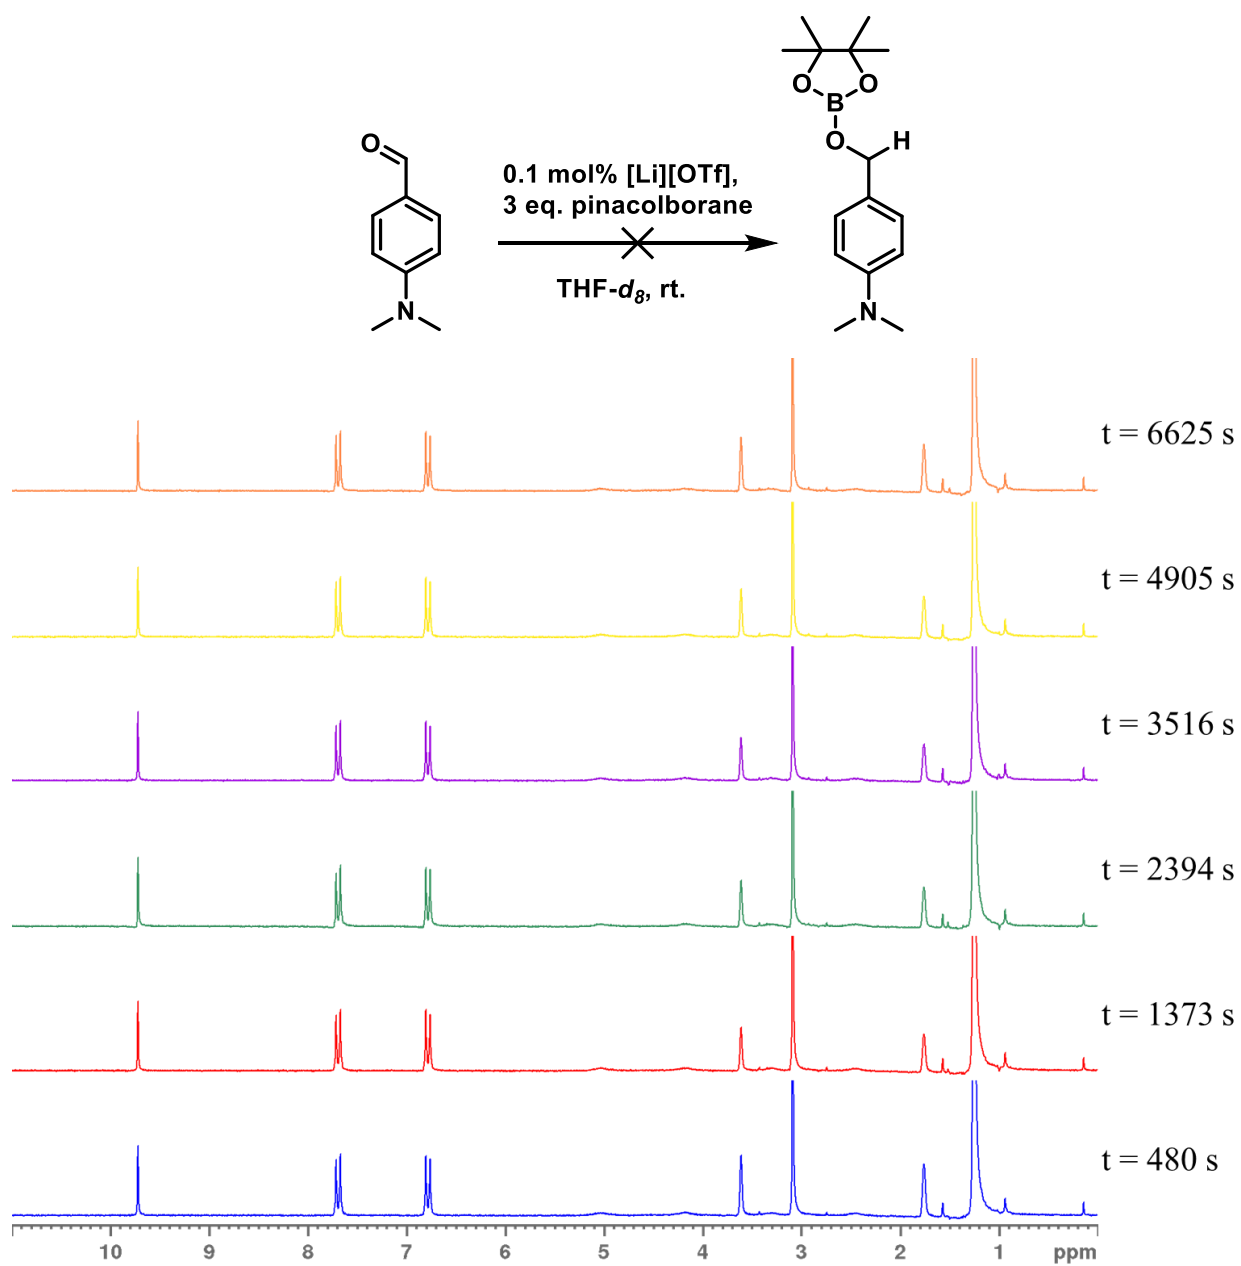

**Figure S 54:** No reaction between *p*DMA-BA and pinacolborane was detected with 0.1mol% [Li][OTf] by <sup>1</sup>H NMR spectroscopy(200 MHz, THF-*d*<sub>8</sub>, 295 K).

## 10. X-ray diffraction structures

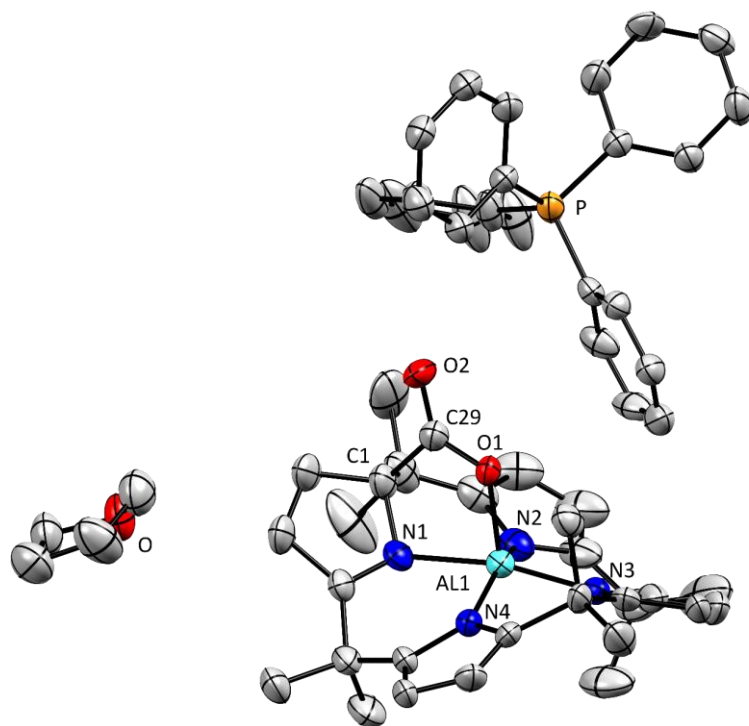

**Figure S55.** Molecular structure of [PPh<sub>4</sub>][1<sup>-</sup>-CO<sub>2</sub>]. Hydrogen atoms are omitted for clarity. Displacement ellipsoids are drawn with a probability of 50 %. Selected bond distances (pm): Al-O(1) 185.0(3), Al-N(1) 197.0(3), N(2)-Al-N(3) 192.1(4), Al-N(3) 189.6(3), Al-N(4) 192.9(3), O(1)-C(29) 129.9(4), O(2)-C(29) 121.7(4), C(1)-C(29) 156.0(5). Selected bond angles (deg): N(1)-Al-N(3) 168.56(14), N(2)-Al-N(4) 152.83(15), O(2)-C(29)-O(1) 126.3(4).

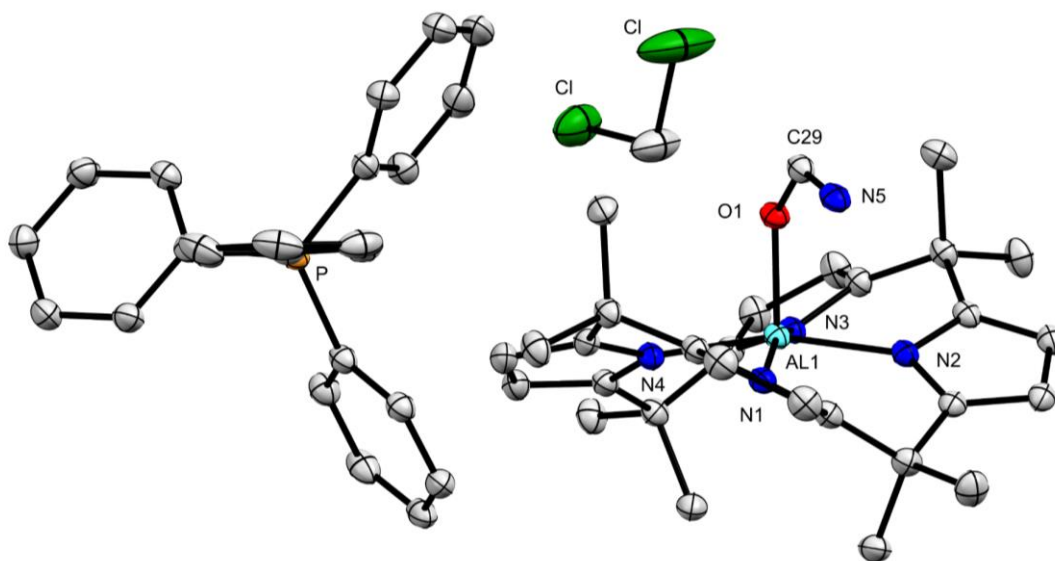

**Figure S56.** Molecular structure of [PPh<sub>4</sub>][1-formanide]. Hydrogen atoms are omitted for clarity. Displacement ellipsoids are drawn with a probability of 50 %. Selected bond distances (pm): Al(1)-O(1) 185.6(3), Al(1)-N(1) 193.8(3), Al(1)-N(2) 195.7(3), Al(1)-N(3) 194.1(3), Al(1)-N(4) 194.9(3), O(1)-C(29) 126.1(3), C(29)-N(5) 129.5(3). Selected bond angles (deg): N(1)-Al(1)-N(3) 162.52(7), N(4)-Al(1)-N(2) 163.08(7), O(1)-C(29)-N(5) 126.68(18).

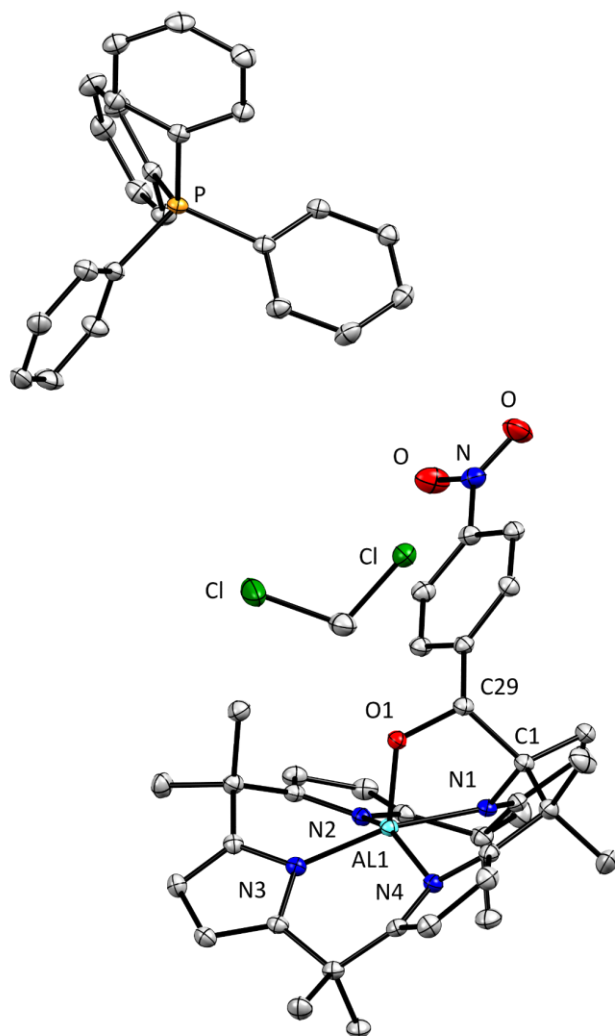

**Figure S57.** Molecular structure of [PPh<sub>4</sub>][1\*-p-nitrobenzaldehyde]. Hydrogen atoms are omitted for clarity. Displacement ellipsoids are drawn with a probability of 50 %. Selected bond distances (pm): Al(1)-O(1) 179.96(11), Al(1)-N(1) 199.08(13), Al(1)-N(2) 195.24(13), Al(1)-N(3) 191.79(13), Al(1)-N(4) 193.50(13), O(1)-C(29) 139.62(17), C(1)-C(29) 160.1(2). Selected bond angles (deg): N(1)-Al(1)-N(3) 149.42(6), N(2)-Al(1)-N(4) 165.51(6).

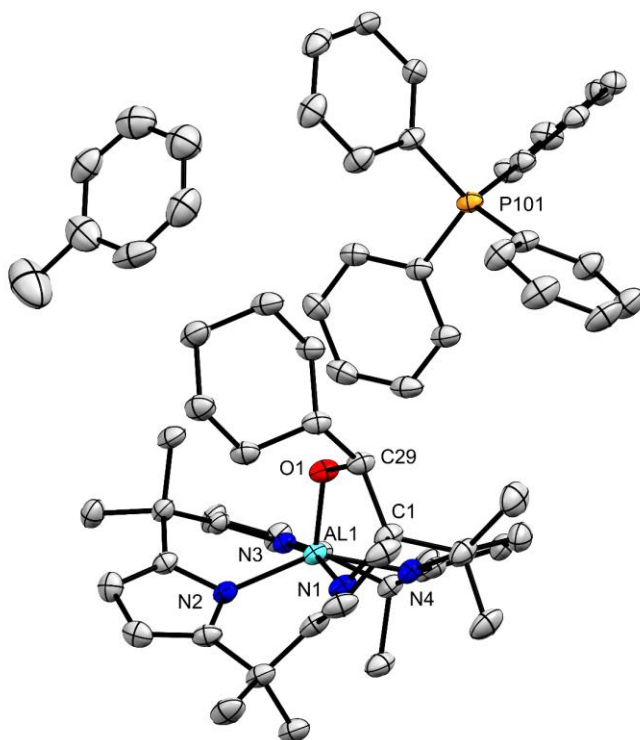

**Figure S58.** Molecular structure of [PPh<sub>4</sub>][1\*-cyclohexanecarboxaldehyde]. Hydrogen atoms are omitted for clarity. Displacement ellipsoids are drawn with a probability of 50 %. Selected bond distances (pm): Al(1)-O(1) 176.73(17), Al(1)-N(1) 191.03(19), Al(1)-N(2) 194.7(2), Al(1)-N(3) 195.4(2), Al(1)-N(4) 198.4(2), O(1)-C(29) 139.8(3), C(1)-C(29) 159.9(3). Selected bond angles (deg): N(1)-Al(1)-N(3) 167.67(8), N(4)-Al(1)-N(2) 147.34(8).

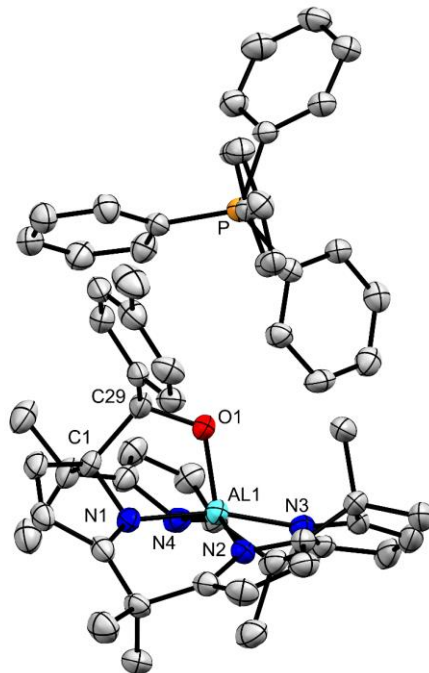

**Figure S59.** Molecular structure of [PPh<sub>4</sub>][1\*-p-methylbenzaldehyde]. Hydrogen atoms are omitted for clarity. Displacement ellipsoids are drawn with a probability of 50 %. Selected bond distances (pm): Al(1)-O(1) 179.0(2), Al(1)-N(1) 197.2(3), Al(1)-N(2) 196.1(2), Al(1)-N(3) 191.5(3), Al(1)-N(4) 195.5(2), O(1)-C(29) 141.0(3), C(1)-C(29) 159.6(4). Selected bond angles (deg): N(1)-Al(1)-N(3) 166.05(11), N(4)-Al(1)-N(2) 149.89(11).

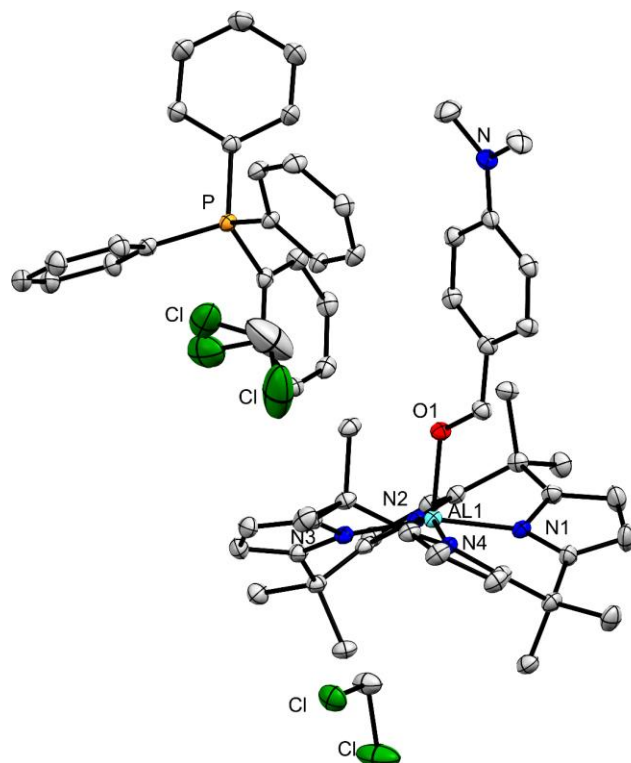

**Figure S60.** Molecular structure of [PPh<sub>4</sub>][1-*p*-dimethylaminobenzaldehyde]. Hydrogen atoms are omitted for clarity. Displacement ellipsoids are drawn with a probability of 50 %. Selected bond distances (pm): Al(1)–O(1) 189.8(2), Al(1)–N(1) 194.1(2), Al(1)–N(2) 194.4(2), Al(1)–N(3) 194.7(2), Al(1)–N(4) 194.4(2), O(1)–C(29) 125.8(3). Selected bond angles (deg): N(1)–Al(1)–N(3) 163.29(10), N(4)–Al(1)–N(2) 162.84(10).

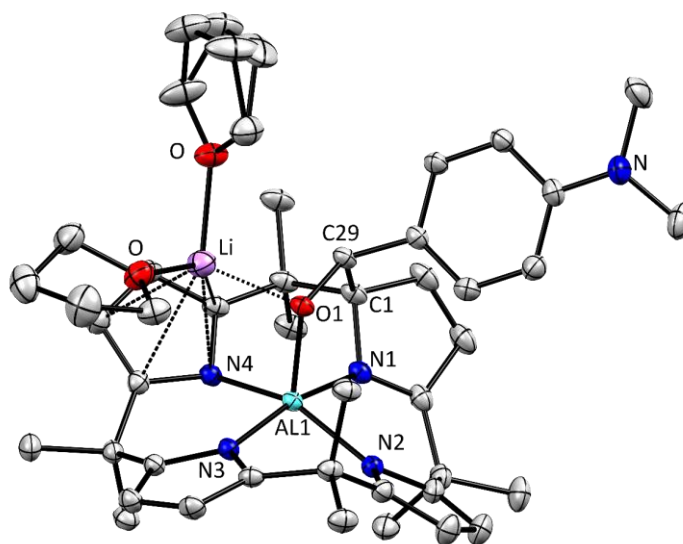

**Figure S61.** Molecular structure of [Li(thf)<sub>2</sub>][1\*-*p*-dimethylaminobenzaldehyde]. Hydrogen atoms are omitted for clarity. Displacement ellipsoids are drawn with a probability of 50 %. Selected bond distances (pm): Al(1)–O(1) 189.8(2), Al(1)–N(1) 194.1(2), Al(1)–N(2) 194.4(2), Al(1)–N(3) 194.7(2), Al(1)–N(4) 194.4(2), O(1)–C(29) 125.8(3). Selected bond angles (deg): N(1)–Al(1)–N(3) 163.29(10), N(4)–Al(1)–N(2) 162.84(10).

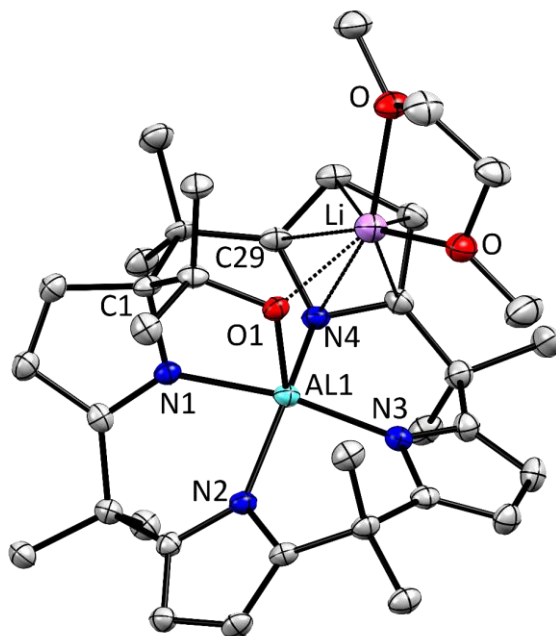[illegible]

52

## 11. NMR spectra of all new compounds

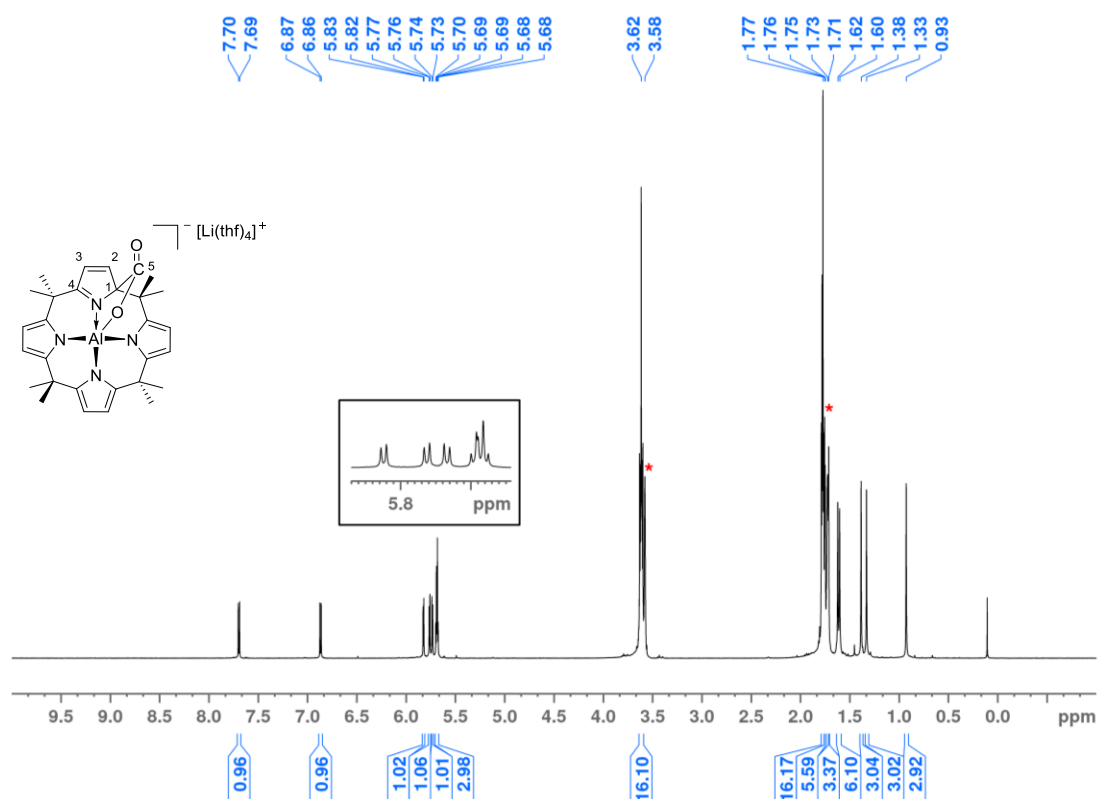Figure S64. <sup>1</sup>H NMR (400 MHz, THF-*d*<sub>6</sub>, 295 K) spectrum of [Li(thf)<sub>4</sub>][1<sup>+</sup>-CO<sub>2</sub>].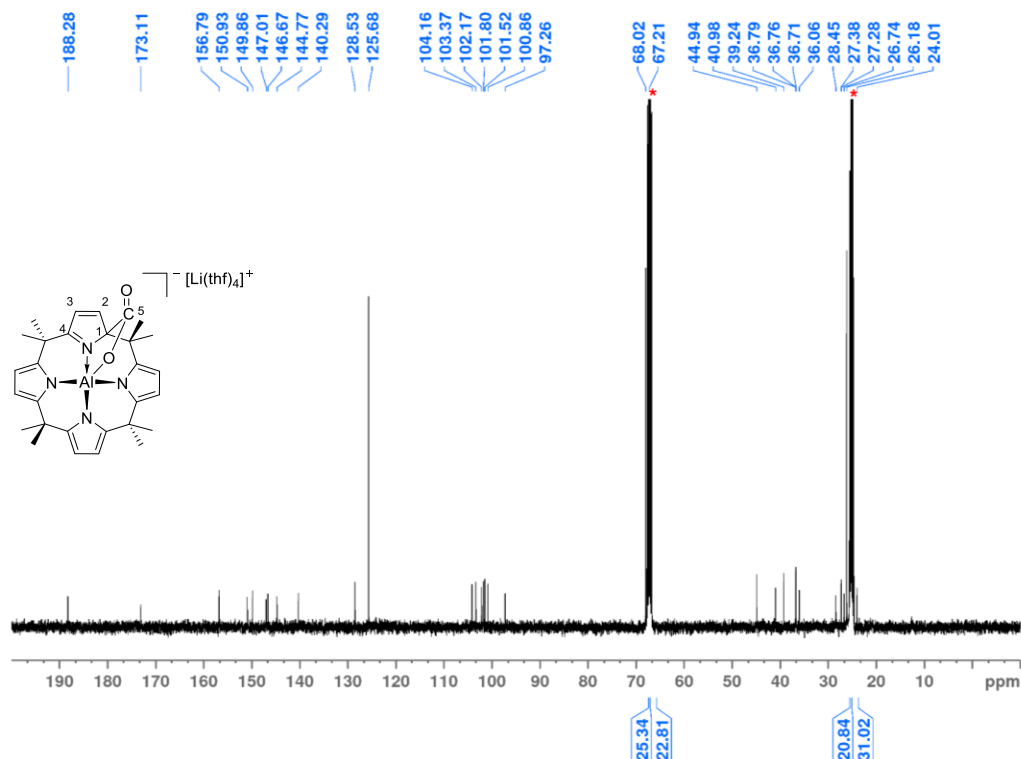Figure S65. <sup>13</sup>C{<sup>1</sup>H} NMR (100 MHz, DCM-*d*<sub>2</sub>, 295 K) spectrum of [Li(thf)<sub>4</sub>][1<sup>+</sup>-CO<sub>2</sub>].

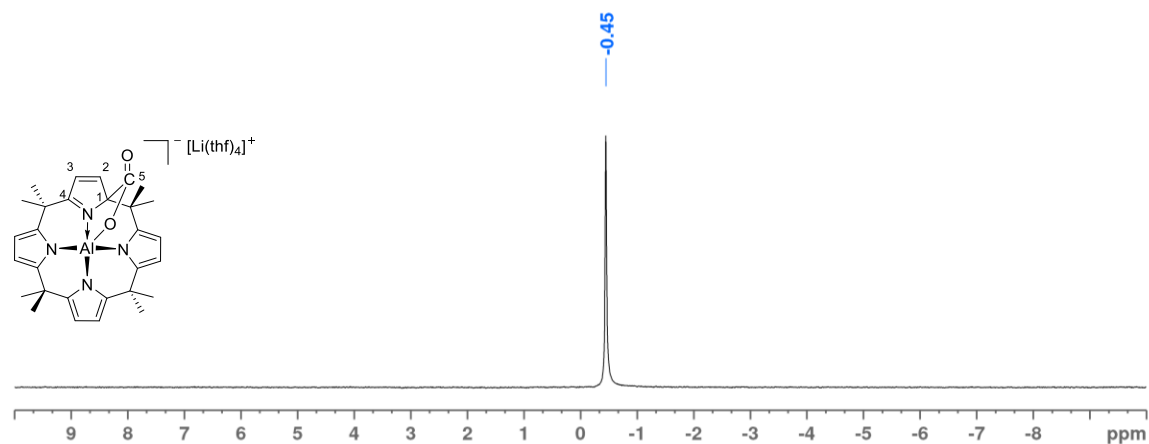

Figure S66.  $^7\text{Li}$  NMR (155 MHz,  $\text{THF}-d_6$ , 295 K) spectrum of  $[\text{Li}(\text{thf})_4][1^*-\text{CO}_2]$ .

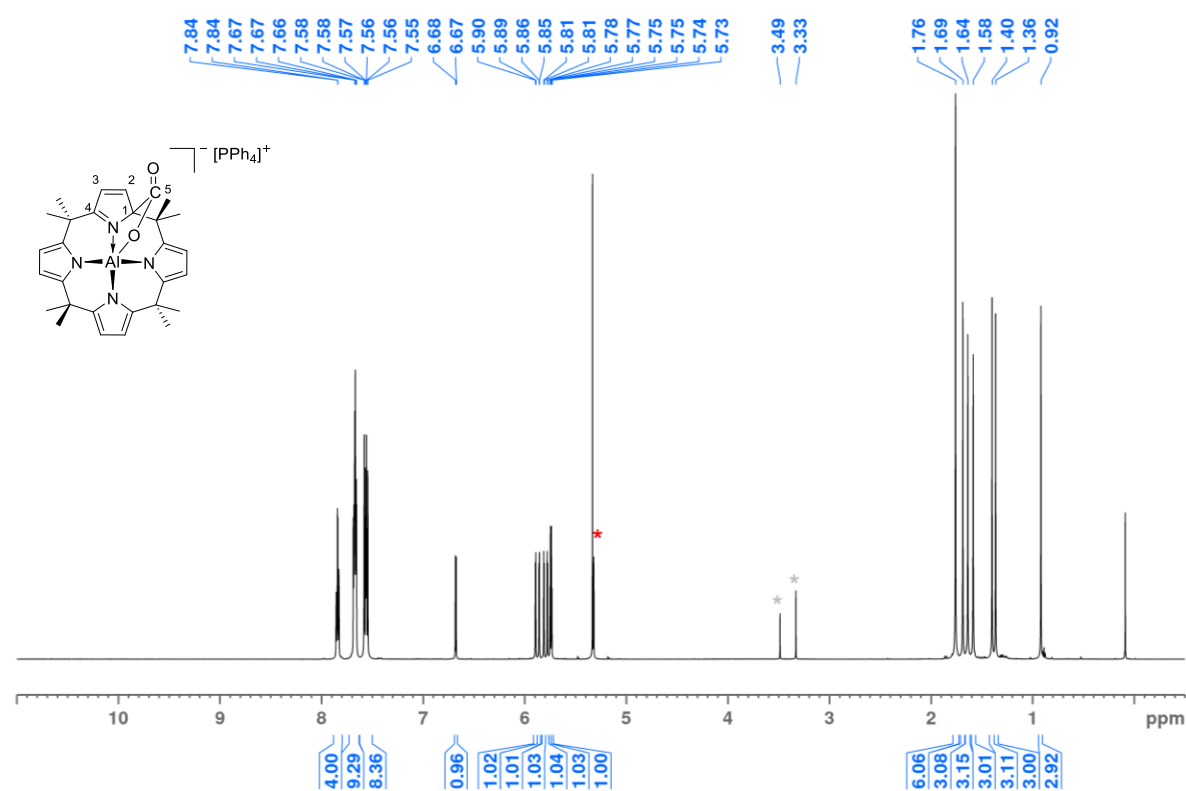

Figure S 67:  $^1\text{H}$  NMR (600 MHz,  $\text{DCM}-d_2$ , 295 K) spectrum of  $[\text{PPh}_4][1^*-\text{CO}_2]$ . The gray asterisk marks residual dimethoxyethane.

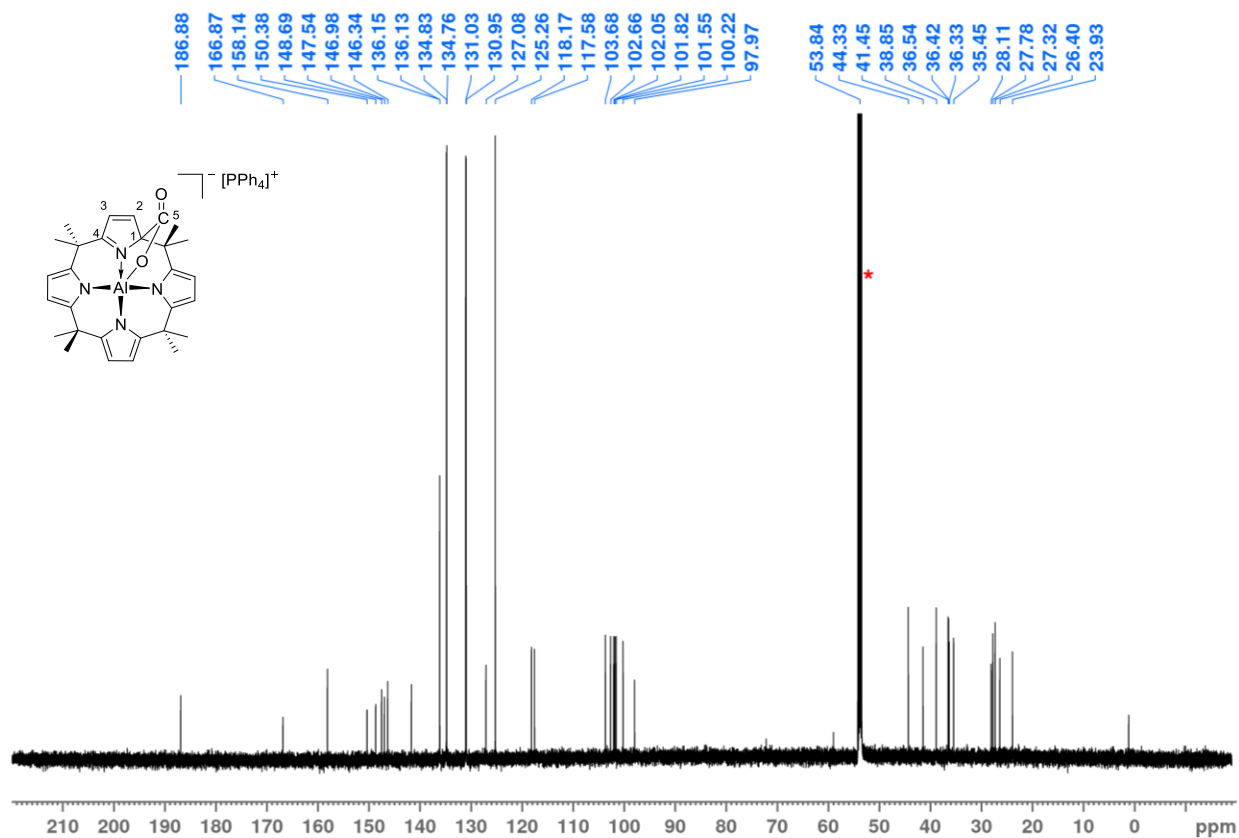

Figure S 68: <sup>13</sup>C{<sup>1</sup>H} NMR (150 MHz, DCM-*d*<sub>2</sub>, 295 K) spectrum of [PPh<sub>4</sub>][1<sup>\*</sup>-CO<sub>2</sub>].

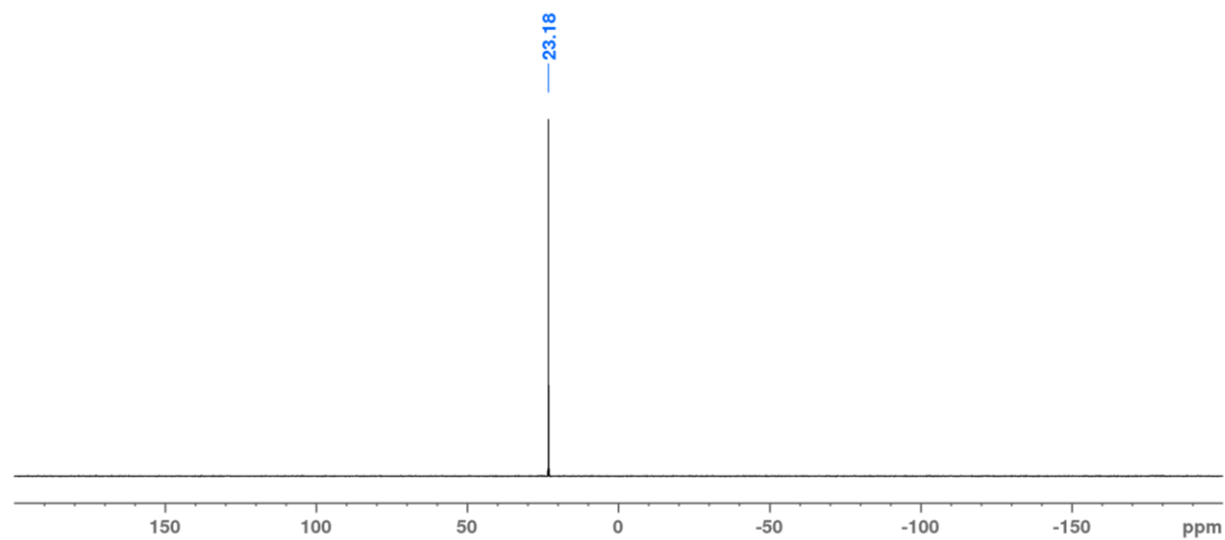

Figure S 69: <sup>31</sup>P NMR (243 MHz, DCM-*d*<sub>2</sub>, 295 K) spectrum of [PPh<sub>4</sub>][1<sup>\*</sup>-CO<sub>2</sub>].

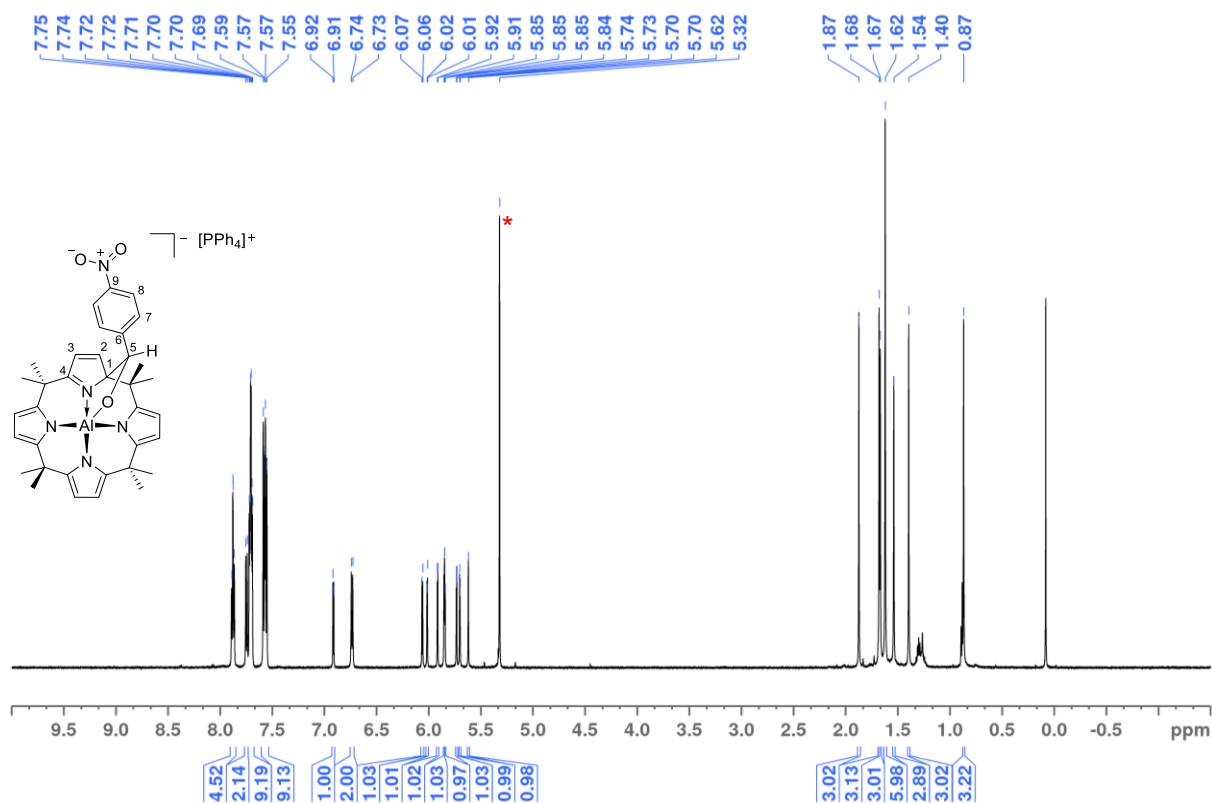

Figure S 70: <sup>1</sup>H NMR (600 MHz, DCM-*d*<sub>2</sub>, 295 K) spectrum of [PPh<sub>4</sub>][1\*-*p*-nitrobenzaldehyde].

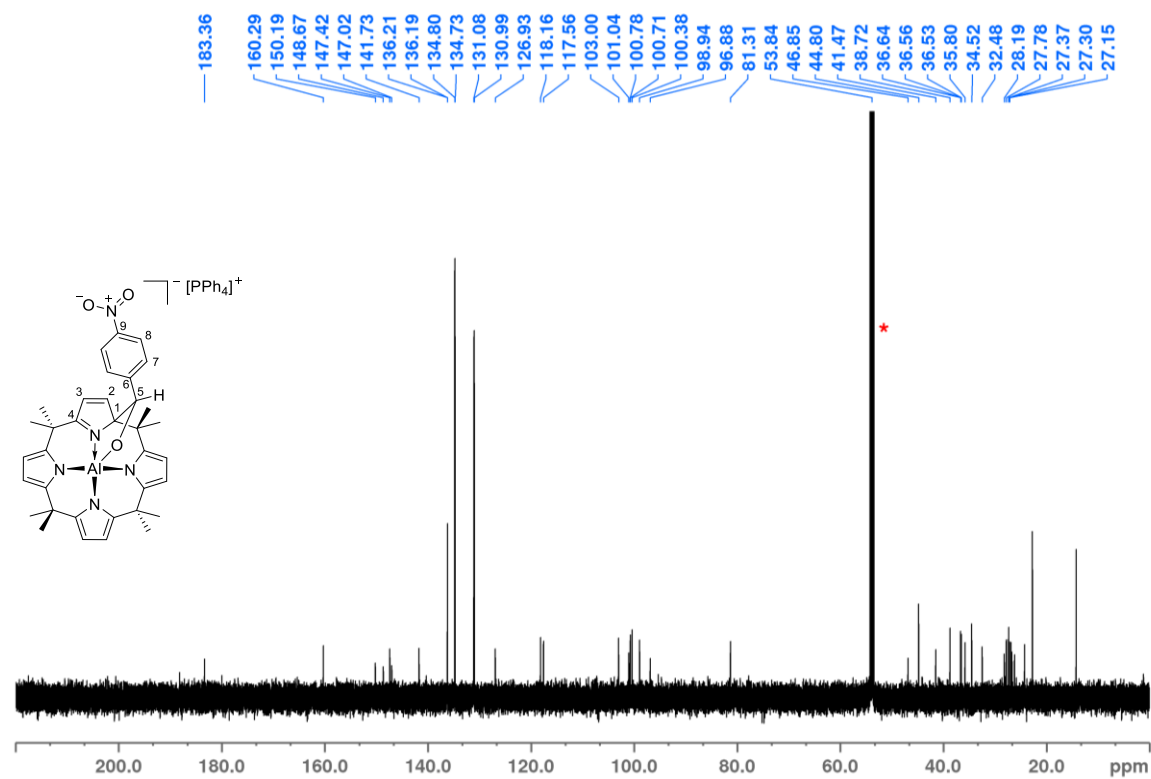

Figure S 71: <sup>13</sup>C{<sup>1</sup>H} NMR (150 MHz, DCM-*d*<sub>2</sub>, 295 K) spectrum of [PPh<sub>4</sub>][1\*-*p*-nitrobenzaldehyde].

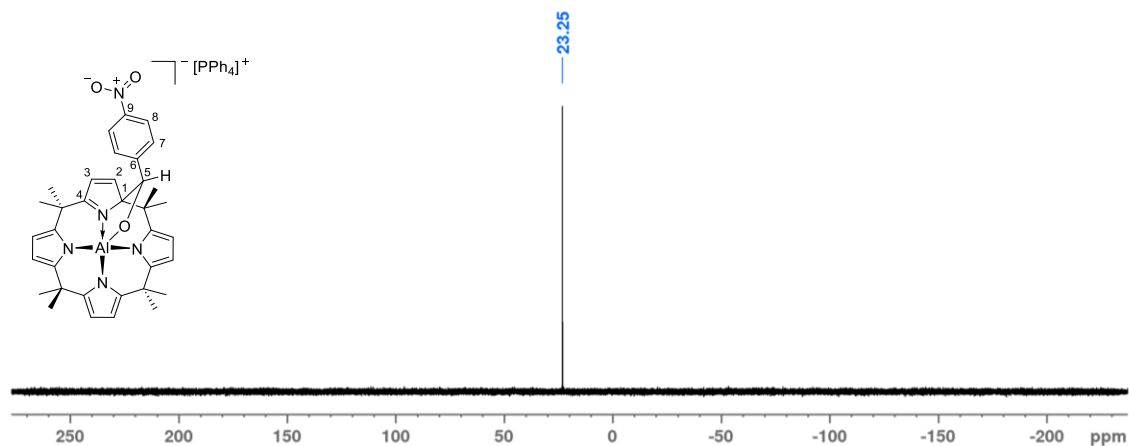

Figure S 72:  $^{31}\text{P}$  NMR (243 MHz,  $\text{DCM}-d_2$ , 295 K) spectrum of  $[\text{PPh}_4][1^*-\text{p-nitrobenzaldehyde}]$ .

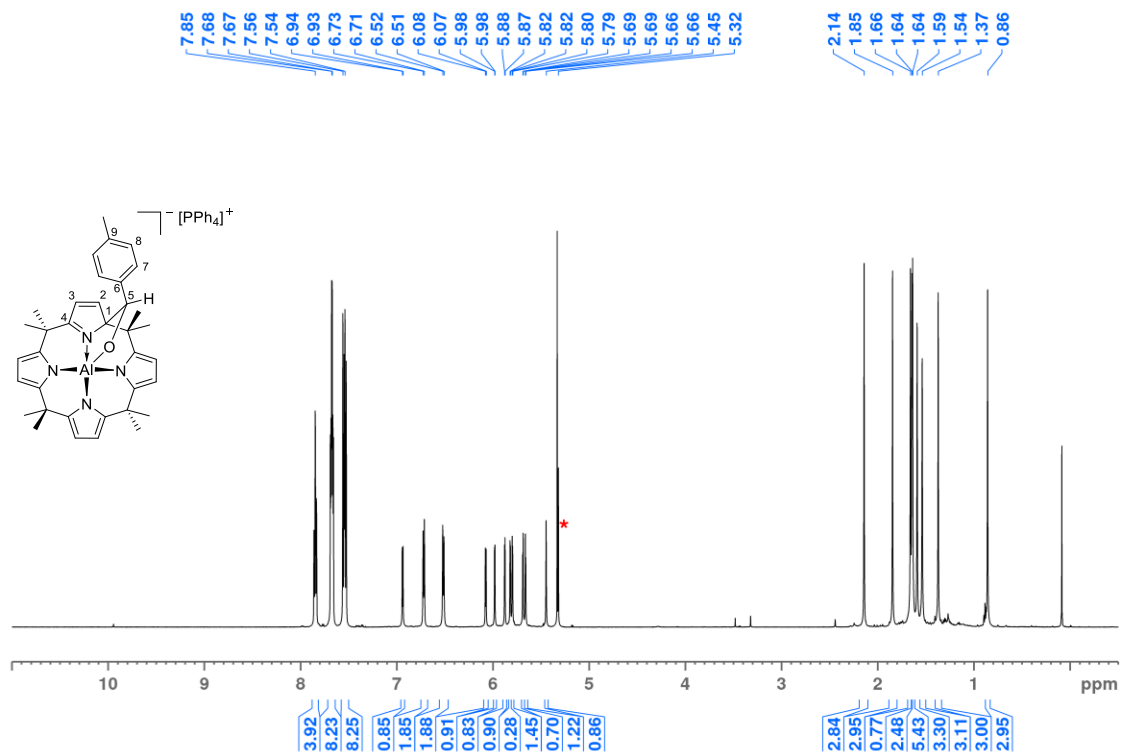

Figure S 73:  $^1\text{H}$  NMR (600 MHz,  $\text{DCM}-d_2$ , 295 K) spectrum of  $[\text{PPh}_4][1^*-\text{p-methylbenzaldehyde}]$ .

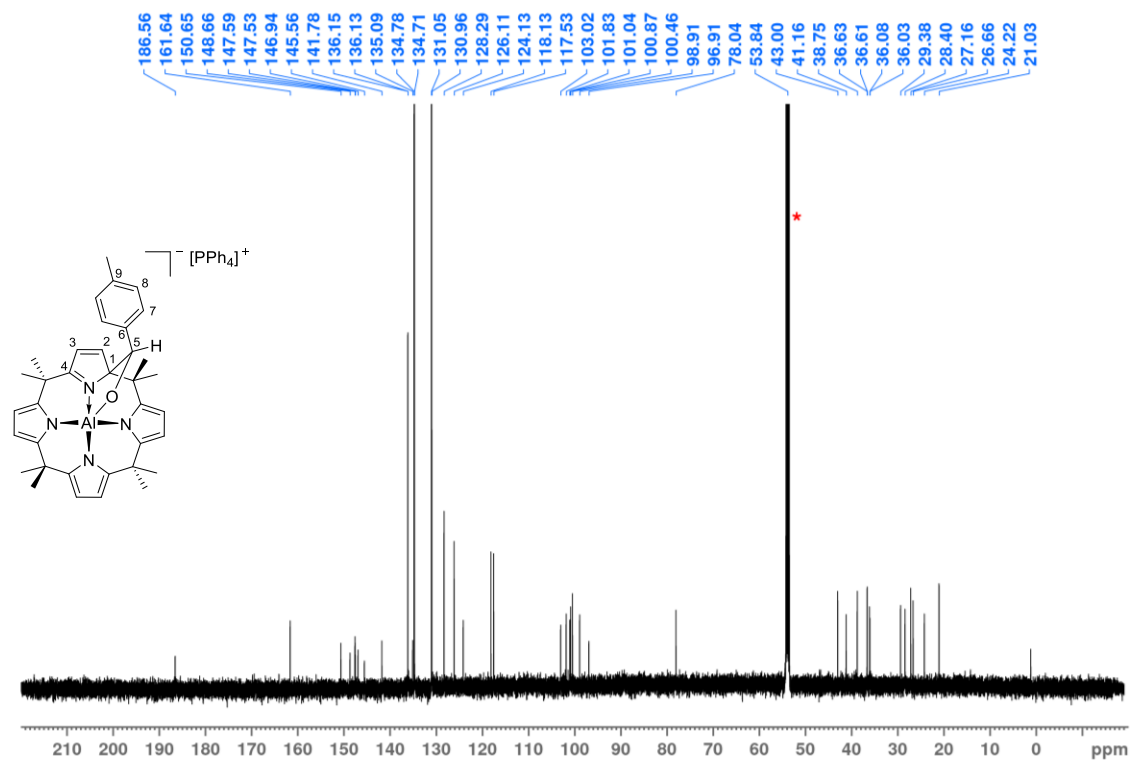

Figure S 74:  $^{13}\text{C}\{^1\text{H}\}$  NMR (150 MHz,  $\text{DCM}-d_2$ , 295 K) spectrum of  $[\text{PPh}_4][1^*-p\text{-methylbenzaldehyde}]$ .

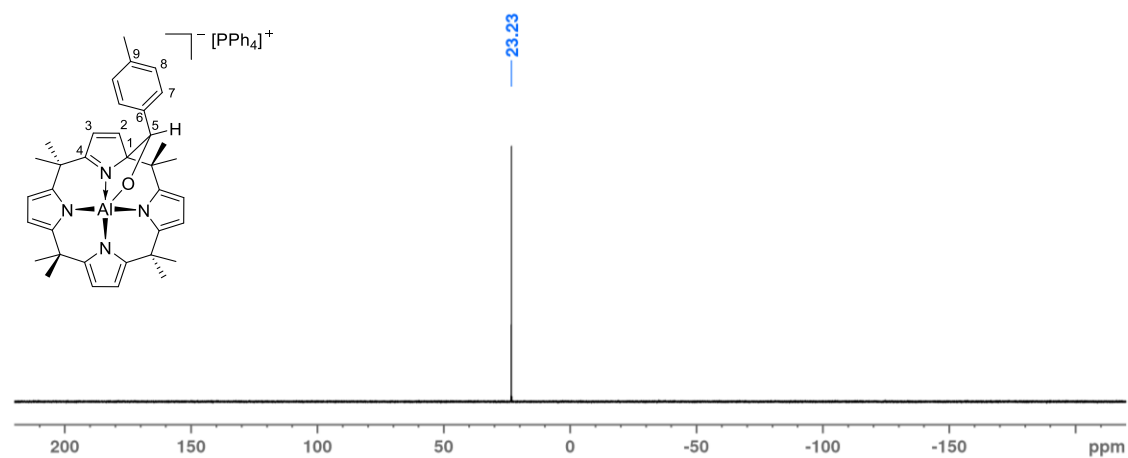

Figure S 75:  $^{31}\text{P}$  NMR (162 MHz,  $\text{DCM}-d_2$ , 295 K) spectrum of  $[\text{PPh}_4][1^*-p\text{-methylbenzaldehyde}]$ .

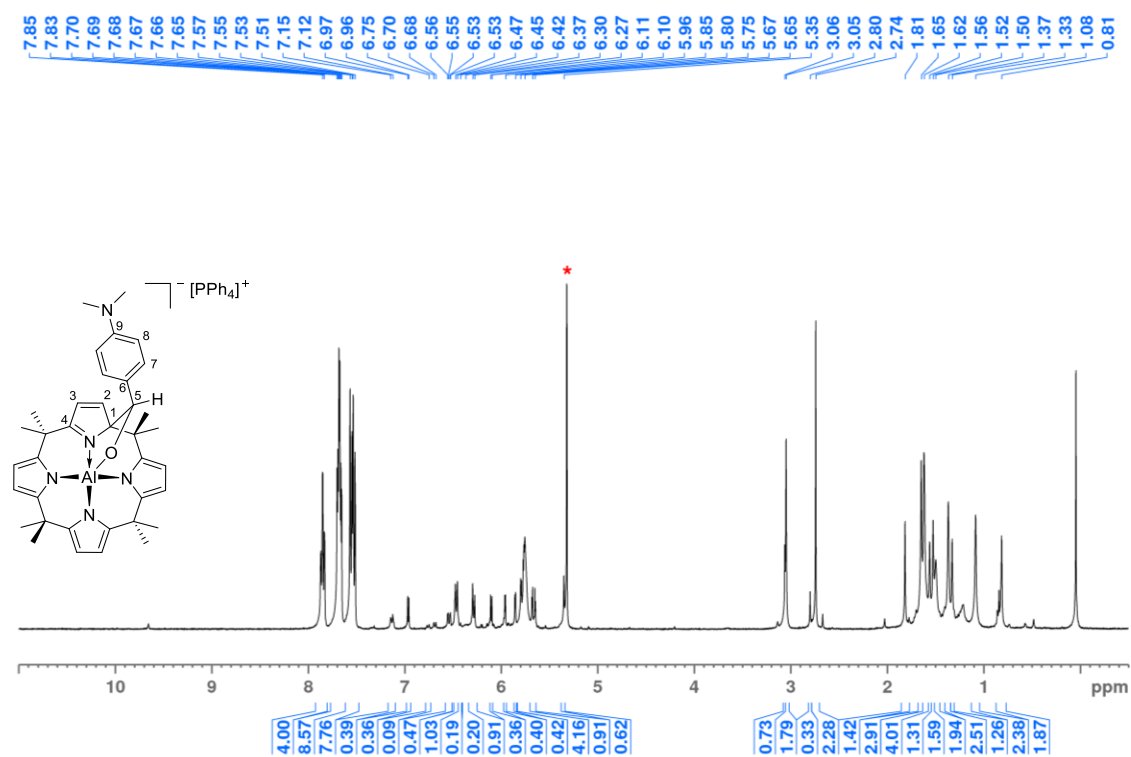

Figure S 76:  $^1\text{H}$  NMR (400 MHz,  $\text{DCM-d}_2$ , 270 K) spectrum of  $[\text{PPh}_4][1^*-p\text{-dimethylaminobenzaldehyde}]$ .

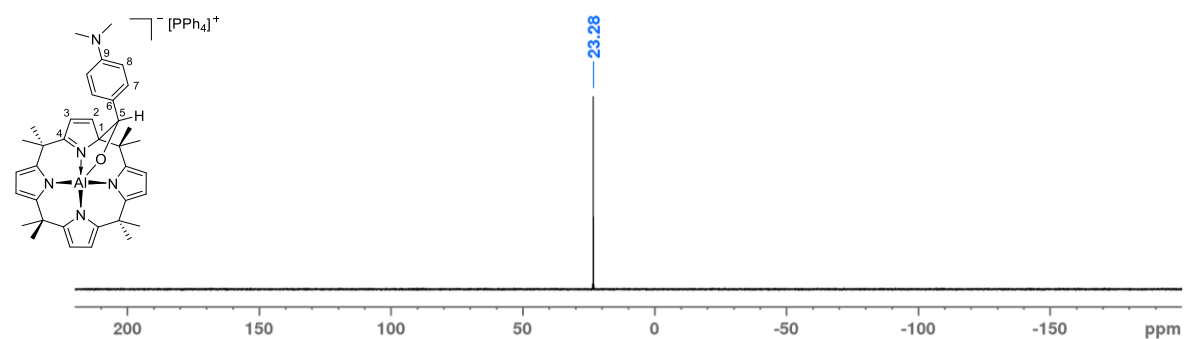

Figure S 77:  $^{31}\text{P}$  NMR (162 MHz,  $\text{DCM-d}_2$ , 270 K) spectrum of  $[\text{PPh}_4][1^*-p\text{-dimethylaminobenzaldehyde}]$ .

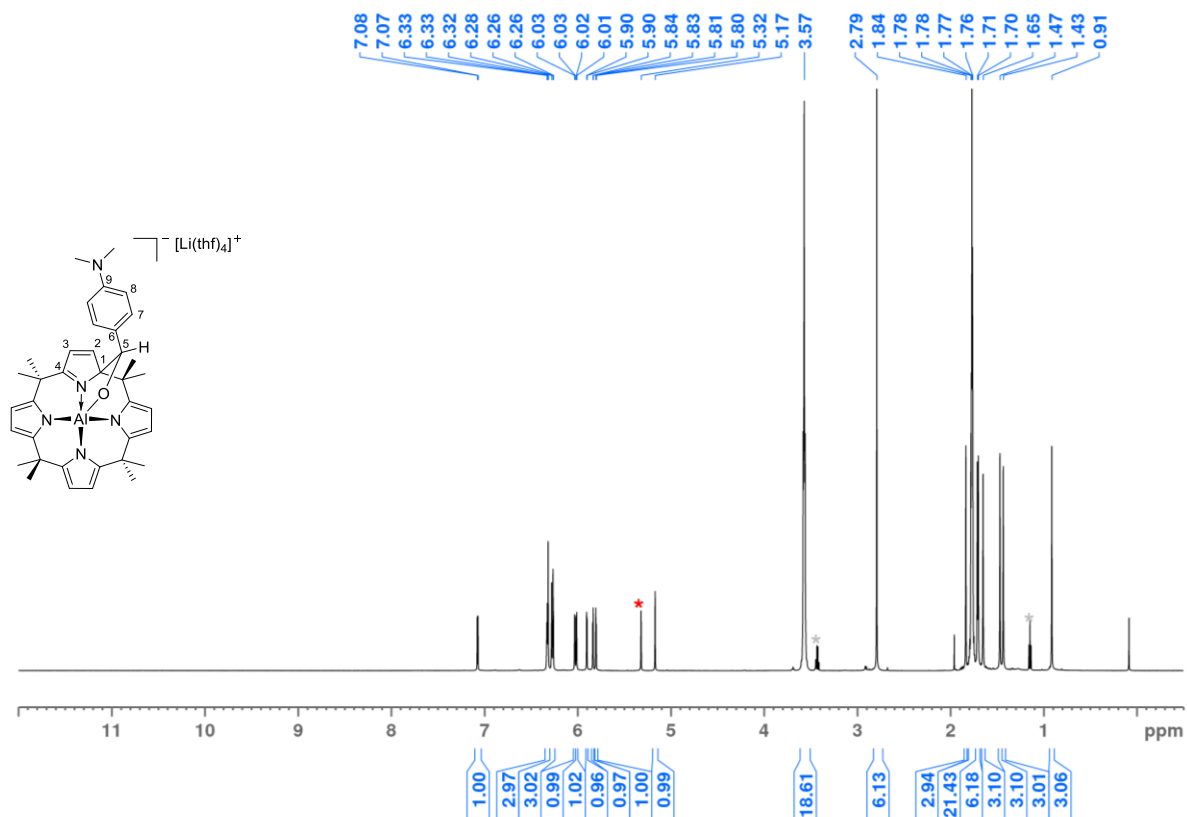

Fig-

ure S 78:  $^1\text{H}$  NMR (600 MHz,  $\text{DCM}-d_2$ , 295 K) spectrum of  $[\text{Li}(\text{thf})_4][1^*-p\text{-dimethylaminobenzaldehyde}]$ . Gray asterisk marks residue of diethyl ether.

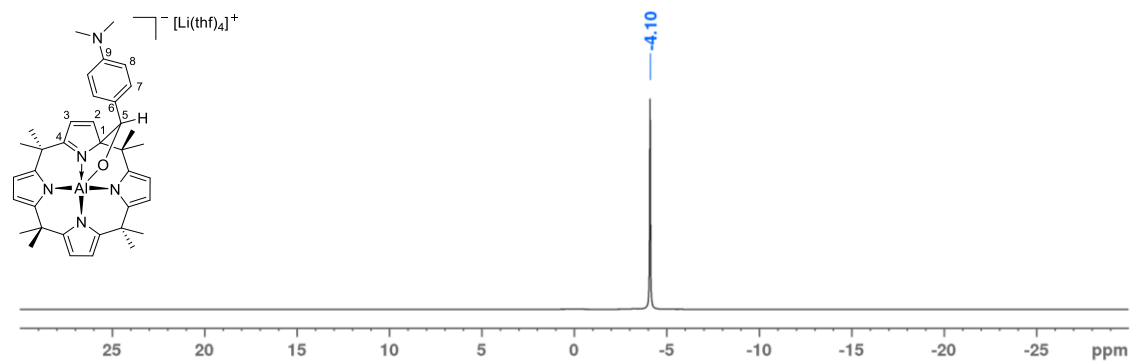

Figure S 79:  $^7\text{Li}$  NMR (233 MHz,  $\text{DCM}-d_2$ , 295 K) spectrum of  $[\text{Li}(\text{thf})_4][1^*-p\text{-dimethylaminobenzaldehyde}]$ .

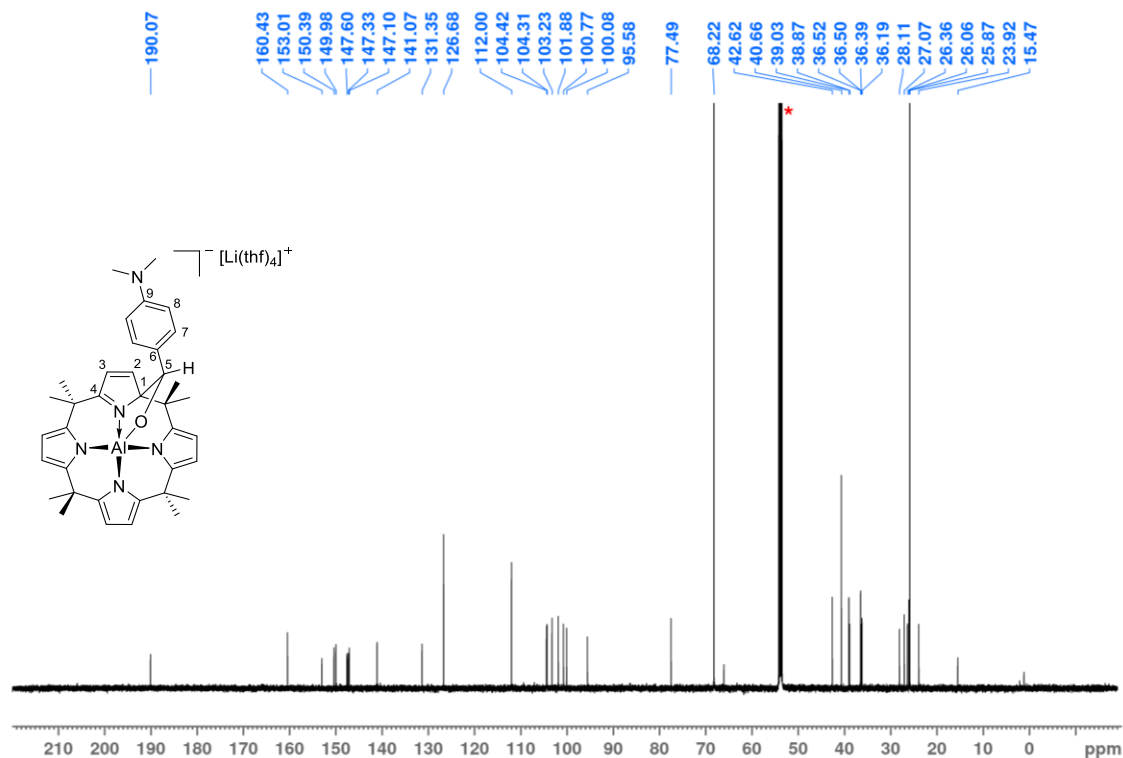

Figure S 80: <sup>13</sup>C{<sup>1</sup>H} NMR (150 MHz, DCM-d<sub>2</sub>, 295 K) spectrum of [Li(thf)<sub>4</sub>][1\*-p-dimethylaminobenzaldehyde].

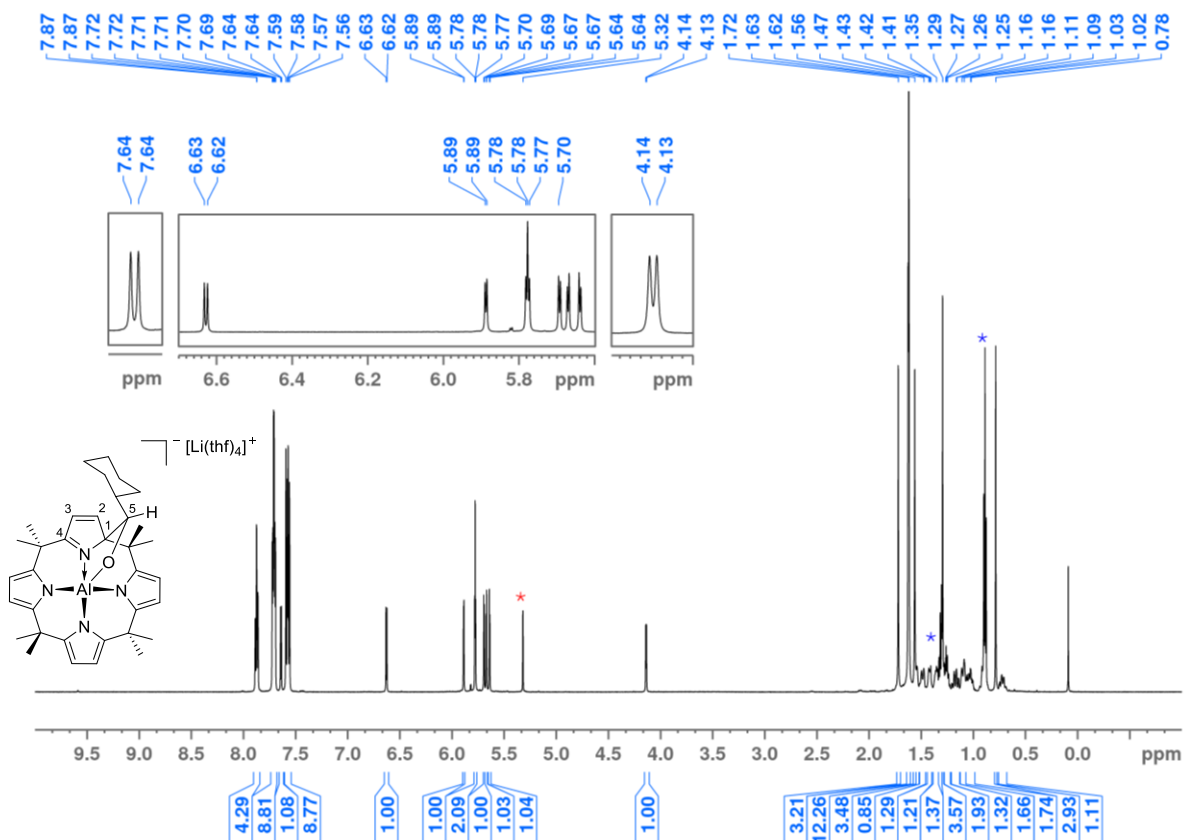

Figure S 81: <sup>1</sup>H NMR (600 MHz, DCM-d<sub>2</sub>, 295 K) spectrum of [PPh<sub>4</sub>][1\*-cyclohexanecarboxaldehyde]. Purple asterisks mark residues of n-pentane.

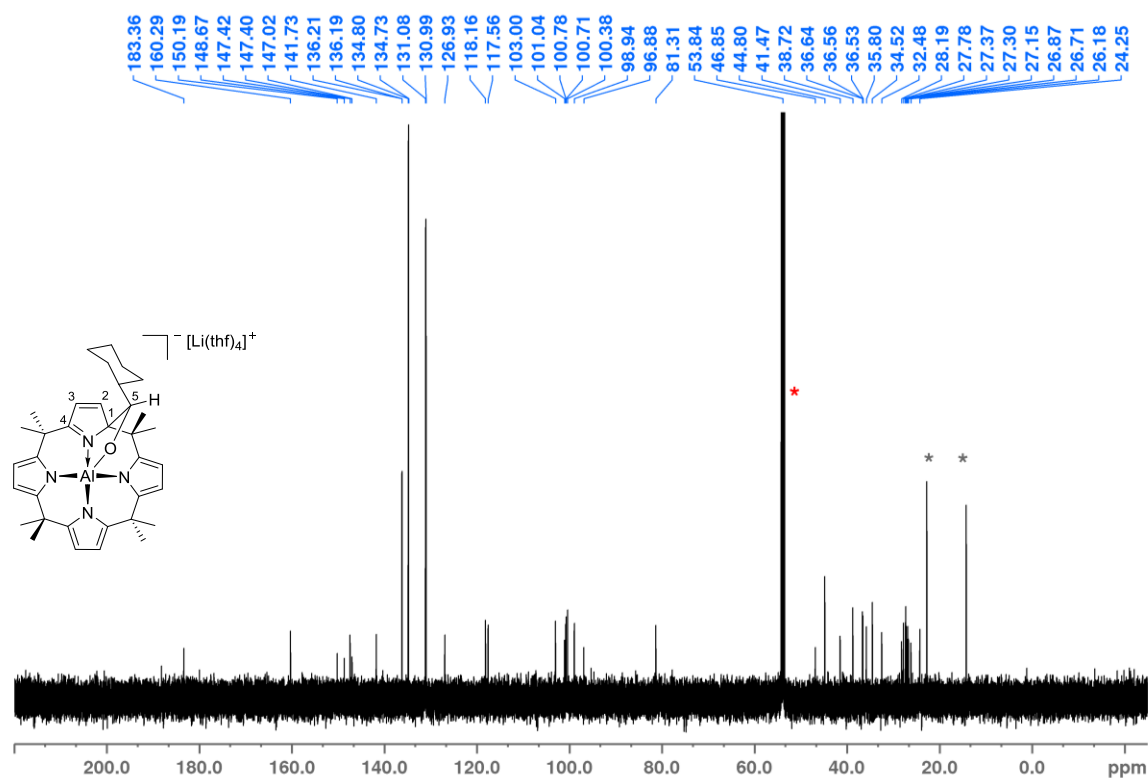

Figure S 82:  $^{13}\text{C}\{^1\text{H}\}$  NMR (150 MHz,  $\text{DCM}-d_2$ , 295 K) spectrum of  $[\text{PPh}_4][1^*\text{-cyclohexanecarboxaldehyde}]$ . Gray asterisks mark residues of *n*-pentane.

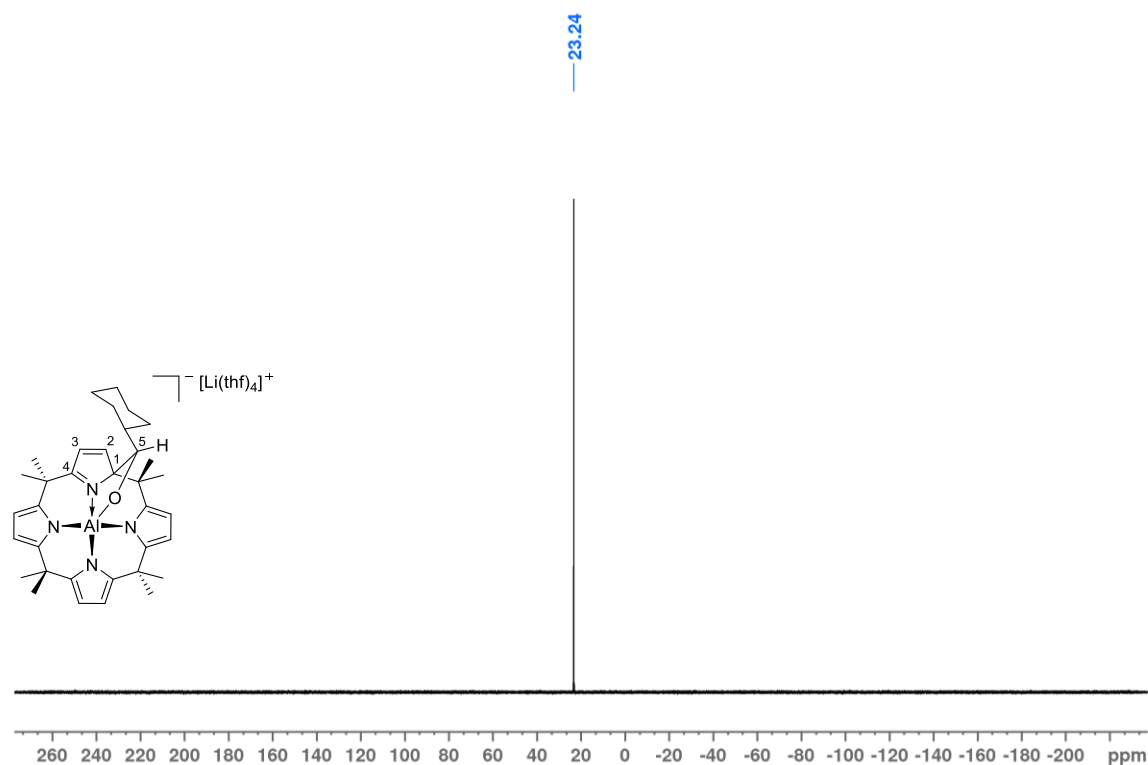

Figure S 83:  $^{31}\text{P}$  NMR (243 MHz,  $\text{DCM}-d_2$ , 295 K) spectrum of  $[\text{PPh}_4][1^*\text{-cyclohexanecarboxaldehyde}]$ .

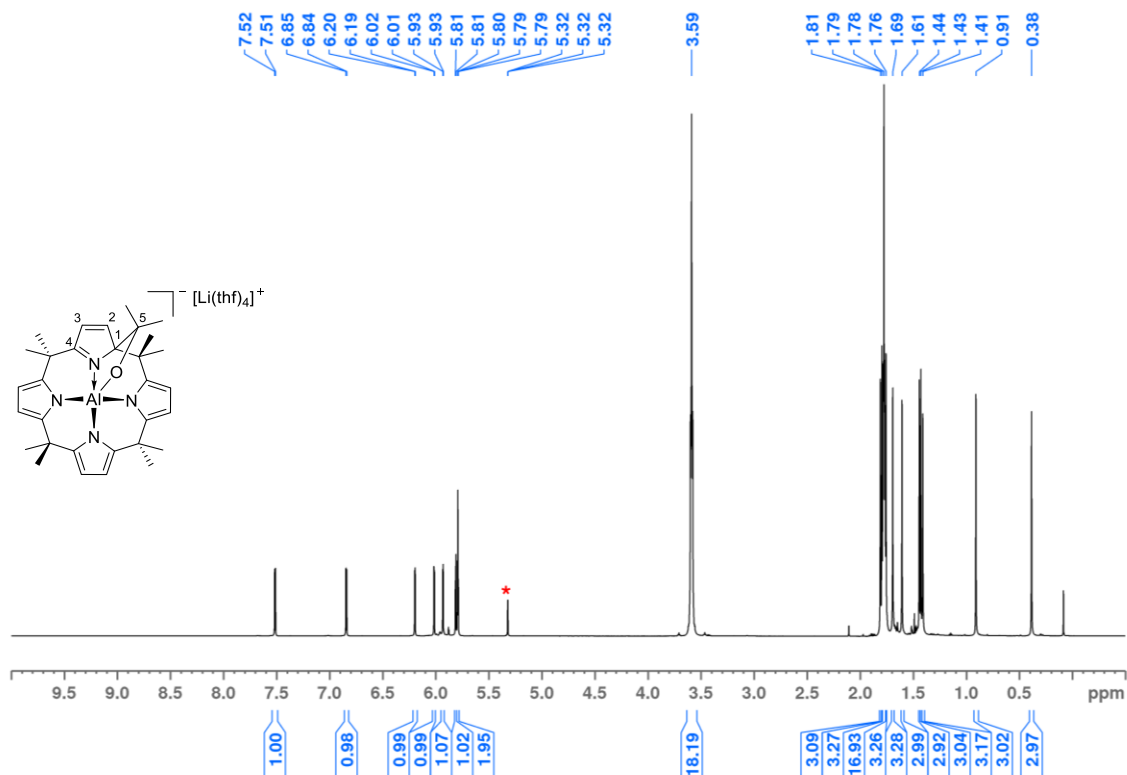

Figure S 84: <sup>1</sup>H NMR (600 MHz, DCM-*d*<sub>2</sub>, 295 K) spectrum of [Li(thf)<sub>4</sub>][1\*-acetone].

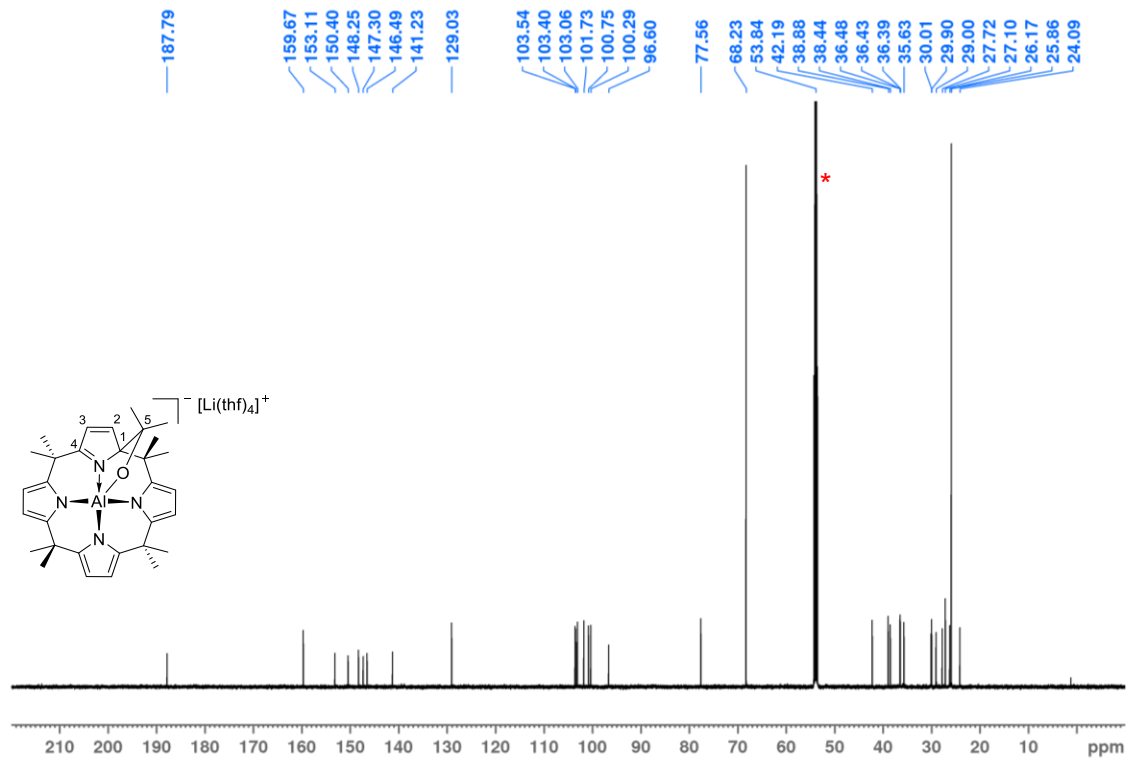

Figure S 85: <sup>13</sup>C{<sup>1</sup>H} NMR (150 MHz, DCM-*d*<sub>2</sub>, 295 K) spectrum of [Li(thf)<sub>4</sub>][1\*-acetone].

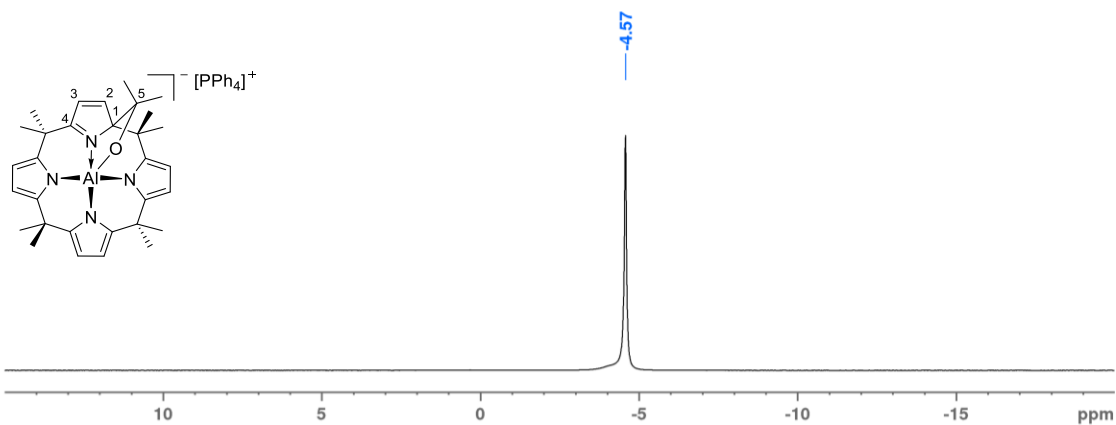

Figure S 86:  $^7\text{Li}$  NMR (233 MHz,  $\text{DCM-d}_2$ , 295 K) spectrum of  $[\text{Li}(\text{thf})_4][1^*\text{-acetone}]$ .

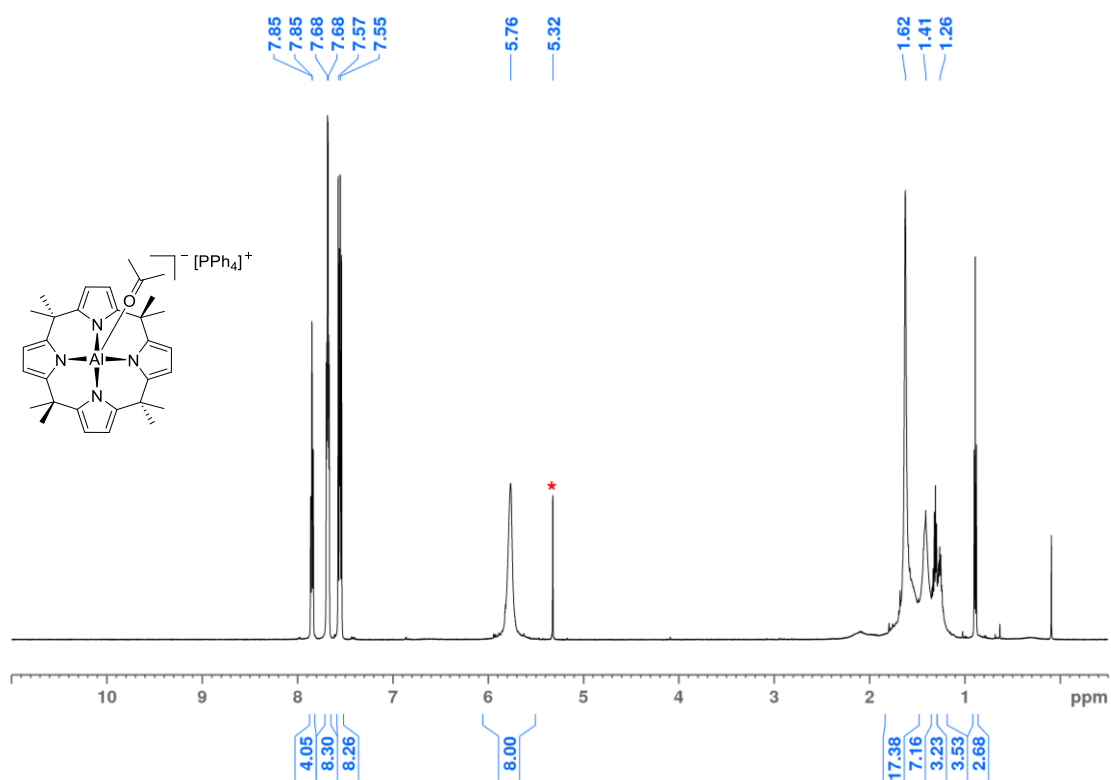

Figure S 87:  $^1\text{H}$  NMR (600 MHz,  $\text{DCM-d}_2$ , 295 K) spectrum of  $[\text{PPh}_4][1^*\text{-acetone}]$ .

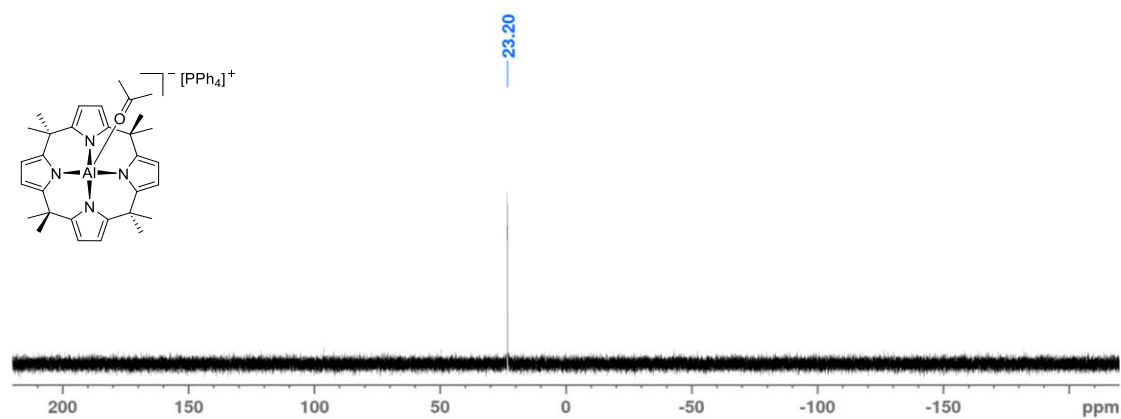

Figure S 88:  $^{31}\text{P}$  NMR (243 MHz,  $\text{DCM}-d_2$ , 295 K) spectrum of  $[\text{PPh}_4][1\text{-acetone}]$ .

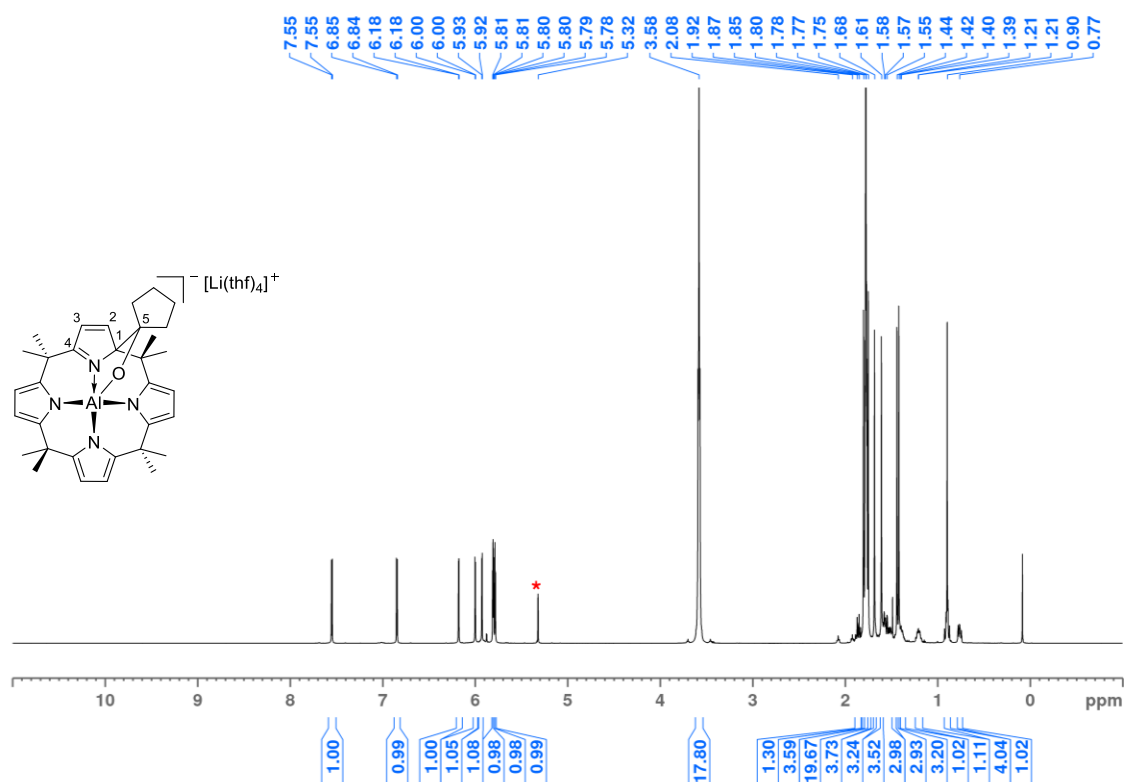

Figure S 89:  $^1\text{H}$  NMR (600 MHz,  $\text{DCM}-d_2$ , 295 K) spectrum of  $[\text{Li}(\text{thf})_4][1^*\text{-cyclopentanone}]$ .

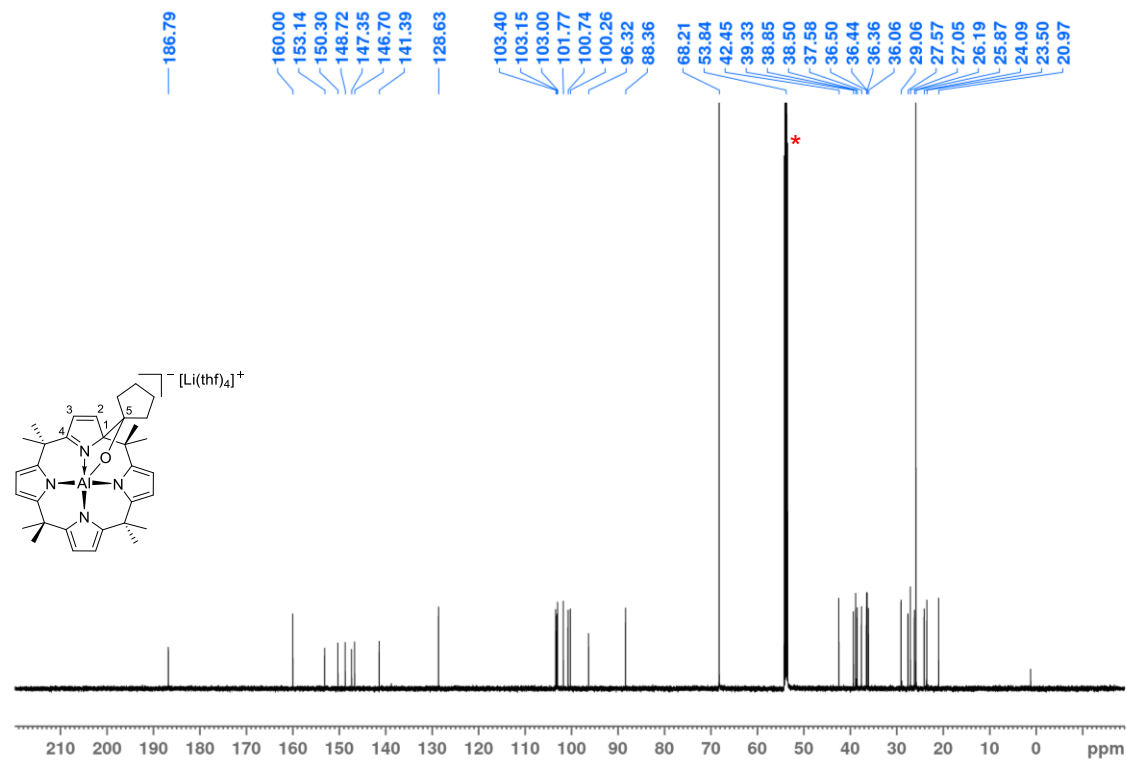

**Figure S 90:** <sup>13</sup>C{<sup>1</sup>H} NMR (150 MHz, DCM-*d*<sub>2</sub>, 295 K) spectrum of [Li(thf)<sub>4</sub>][1\*-cyclopentanone].

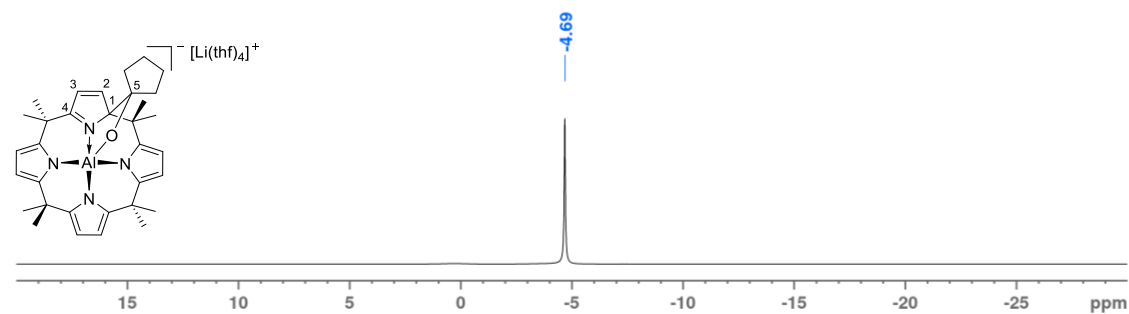

**Figure S 91:** <sup>7</sup>Li NMR (233 MHz, DCM-*d*<sub>2</sub>, 295 K) spectrum of [Li(thf)<sub>4</sub>][1\*-cyclopentanone].

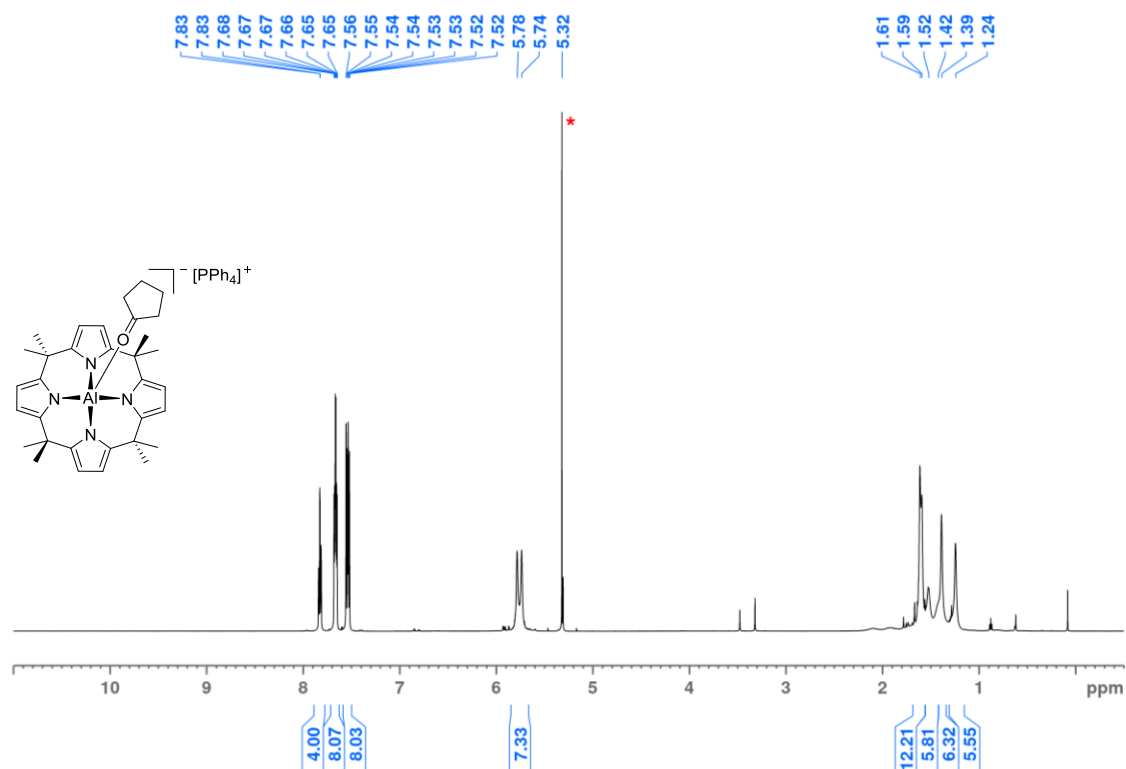

Figure S 92: <sup>1</sup>H NMR (600 MHz, DCM-d<sub>2</sub>, 295 K) spectrum of [PPh<sub>4</sub>][1-cyclopentanone].

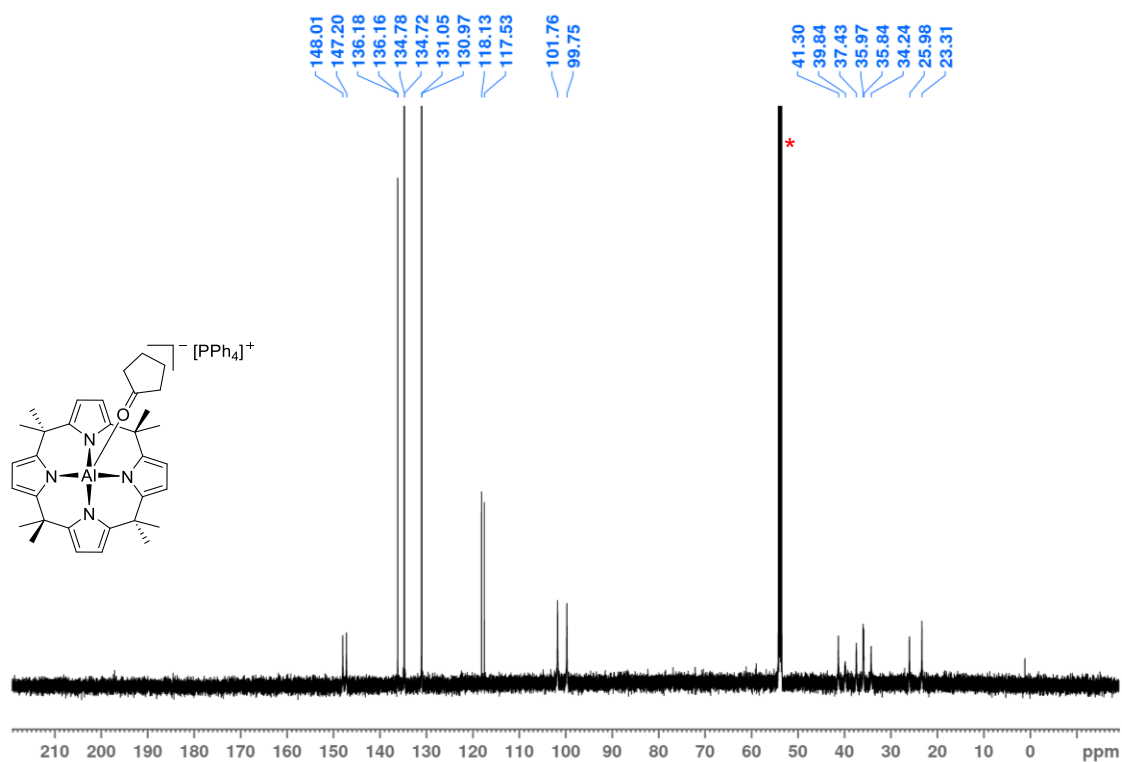

Figure S 93: <sup>13</sup>C NMR (150 MHz, DCM-d<sub>2</sub>, 295 K) spectrum of [PPh<sub>4</sub>][1-cyclopentanone].

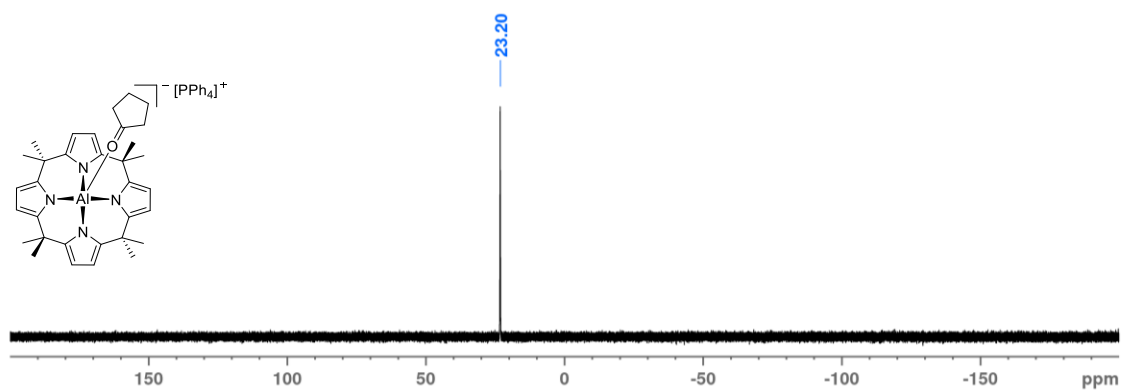

Figure S 94: <sup>31</sup>P NMR (243 MHz, DCM-d<sub>2</sub>, 295 K) spectrum of [PPh<sub>4</sub>][1-cyclopentanone].

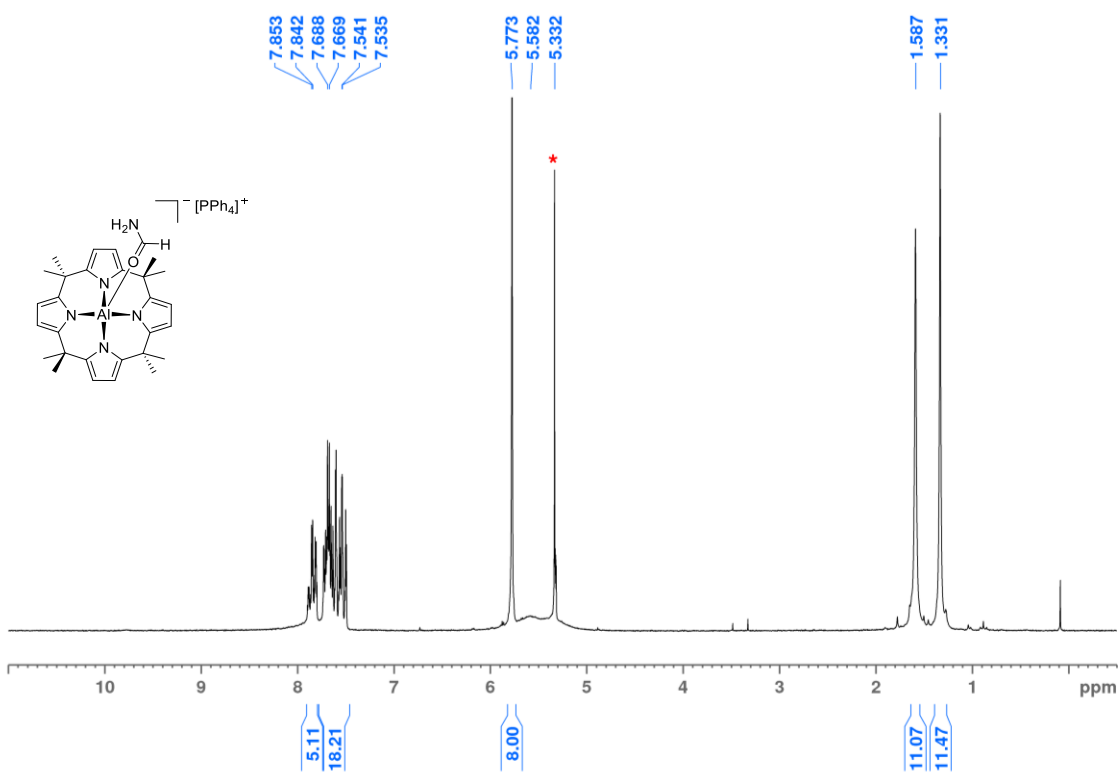

Figure S 95: <sup>1</sup>H NMR (200 MHz, DCM-d<sub>2</sub>, 295 K) spectrum of [PPh<sub>4</sub>][1-formamide].

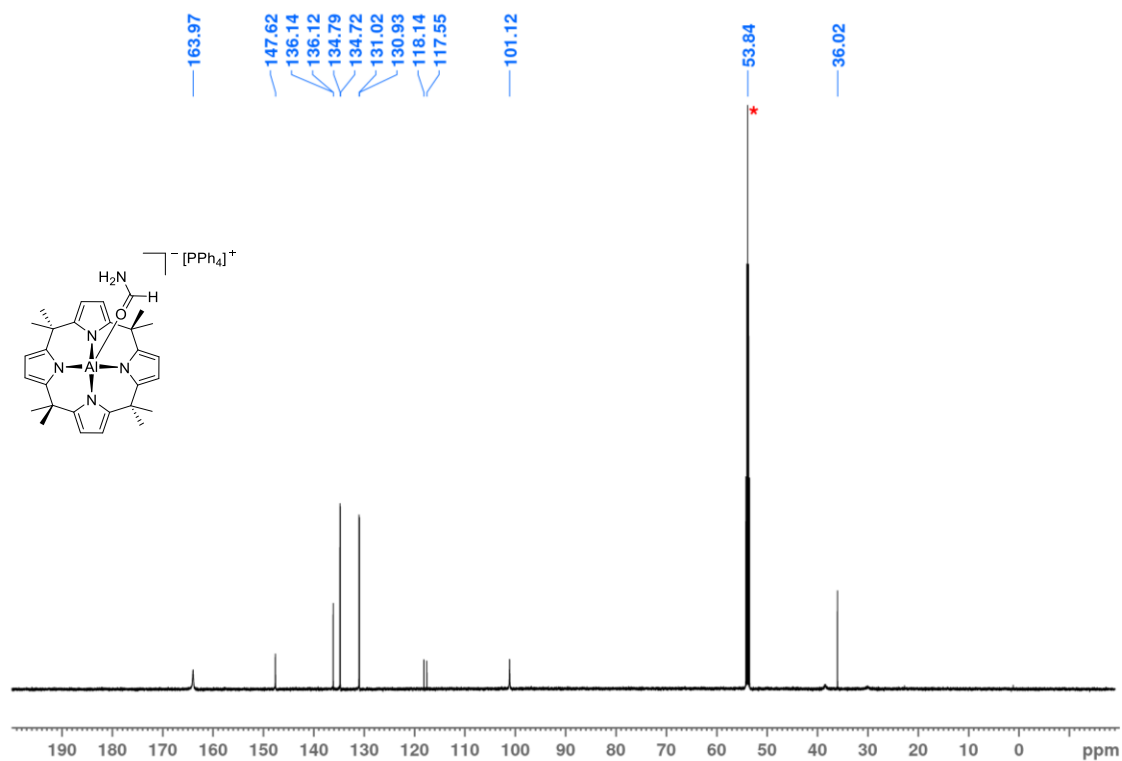

Figure S 96: <sup>13</sup>C{<sup>1</sup>H} NMR (150 MHz, DCM-*d*<sub>2</sub>, 295 K) spectrum of [PPh<sub>4</sub>][1-formamide].

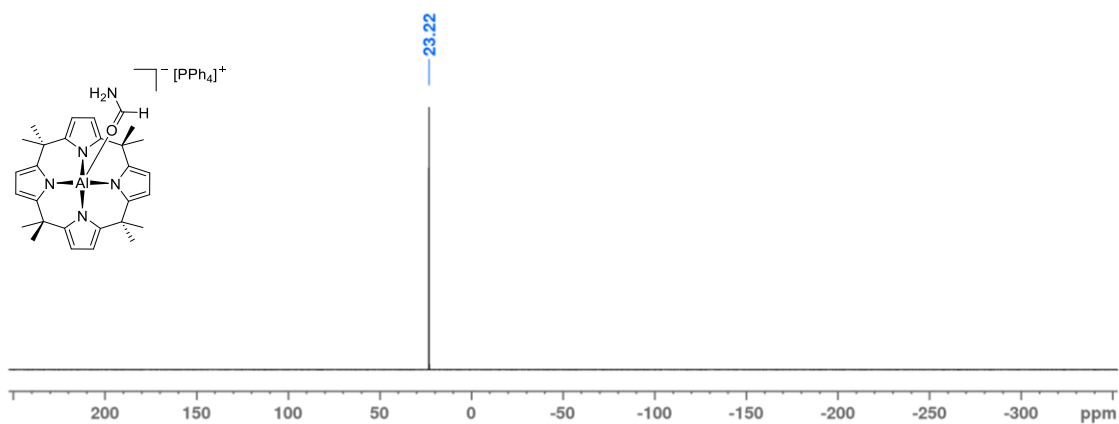

Figure S 97: <sup>31</sup>P NMR (243 MHz, DCM-*d*<sub>2</sub>, 295 K) spectrum of [PPh<sub>4</sub>][1-formamide].

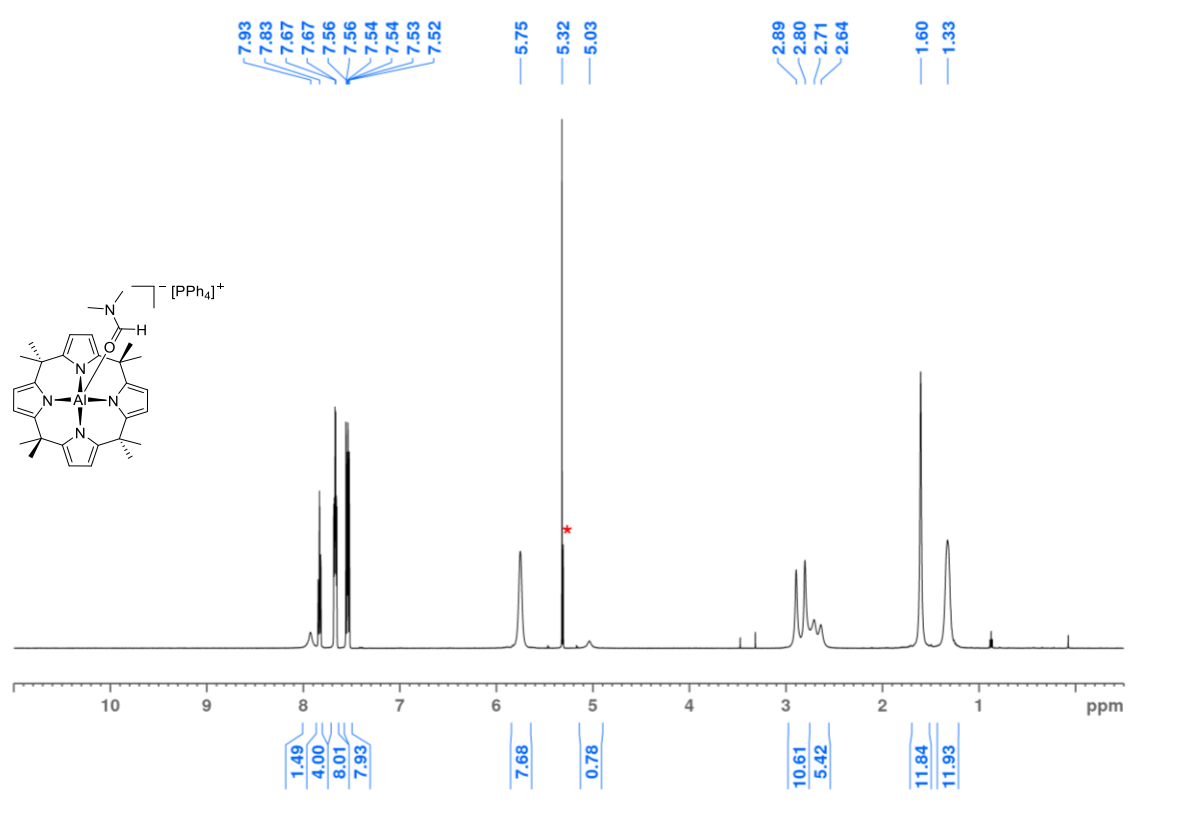

**Figure S 98:**  $^1\text{H}$  NMR (600 MHz,  $\text{DCM-d}_2$ , 295 K) spectrum of  $[\text{PPh}_4][1\text{-dimethylformamide}]$ . Small excess of DMF was unavoidable (peaks  $\delta$  [ppm] = 2.80, 2.89, 7.93).

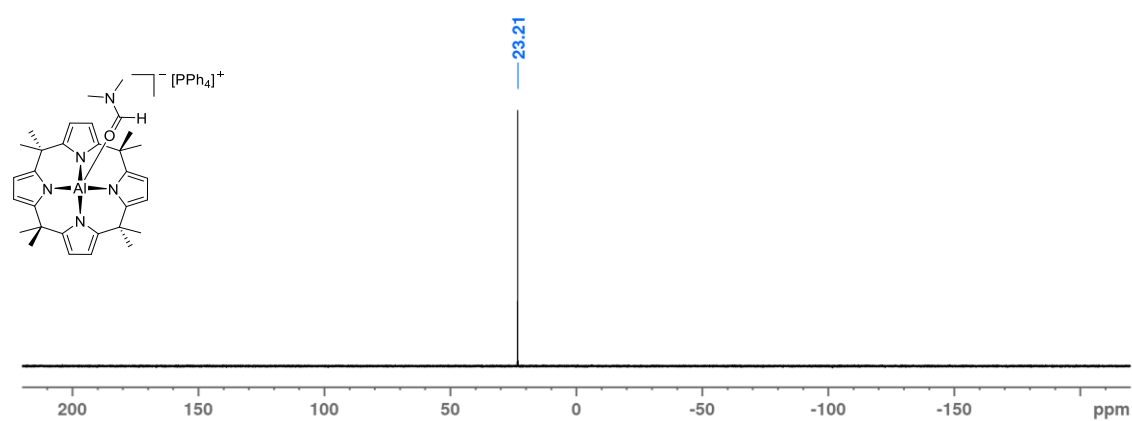

**Figure S 99:**  $^{31}\text{P}$  NMR (243 MHz,  $\text{DCM-d}_2$ , 295 K) spectrum of  $[\text{PPh}_4][1\text{-dimethylformamide}]$ .

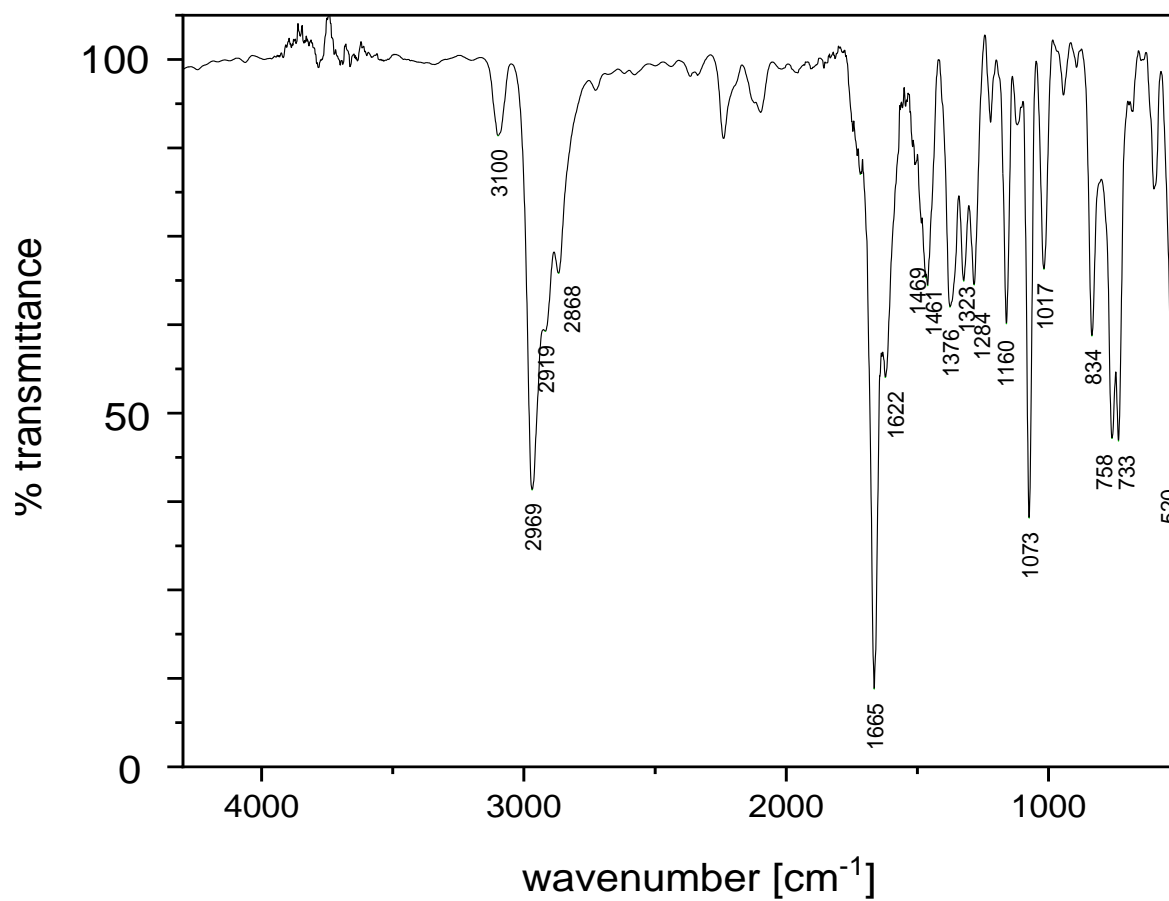

**Figure S100.** IR spectrum in KBr of  $[\text{Li}(\text{thf})_4][\mathbf{1}\text{-CO}_2]$ . C=O band at  $\tilde{\nu} = 1665 \text{ cm}^{-1}$ .

## 12. Computational details

### 12.1. Geometry optimization and single point calculations

Geometry optimizations and single point energy calculations have been performed with ORCA 4.1.2.<sup>2</sup> The RI approximation<sup>3</sup> for the Coulomb integrals was used in all cases (RIJCOSX), with application of corresponding auxiliary basis sets.<sup>4</sup> The single point energies were obtained in two steps. The first geometry optimization was performed on Grimme's PBEh-3c composite method.<sup>5</sup> The obtained geometry was taken and single point energies were obtained on PW6B95-D3(BJ)/def2-QZVPP<sup>6</sup>, including Grimme's semi-empirical dispersion correction<sup>7</sup> with Becke-Johnson damping function<sup>8-10</sup> (D3(BJ) def2-QZVPP<sup>11</sup> basis set).

All calculated geometries have been confirmed as energetic minima on the potential energy surface by analytical calculation of harmonic frequencies at the PBEh-3c level, revealing only positive Hessian eigenvalues. Enthalpies at 298.15 K have been calculated at the same level of theory by using the rigid-rotor harmonic oscillator (RRHO) approximation,<sup>12</sup> as implemented in ORCA. IRC calculations were performed on PBEh-3c level, confirming the transition states, as implemented in ORCA. Solvation free energies were obtained by COSMO-RS in dichloromethane as implemented in ADF<sup>13</sup>.

## 12.2. Overview of different coordination modes and isomers: computation and spectroscopy

Different isomers of the adducts were found and taken into account during the calculations of the thermodynamics of the reactions and the transition states. These were also proofed by several analytical measurements. A rough overview and the connection between calculation and experiments are given now, followed by all computational details. The definition was done as followed and exemplarily shown for *p*DMA-BA (see figure S101): the  $\sigma$ -adduct-A is the one, in which the aldehyde proton points in the direction of the ligand and the opposite arrangement is called  $\sigma$ -adduct-B. The  $\sigma$ -adducts-A are generally computed more stable by roughly 20-30 kJ mol<sup>-1</sup> in comparison to the  $\sigma$ -adducts-B (see figure S105), supporting the SCXRD result of  $\sigma$ -adduct-A for *p*DMA-BA (see figure 5B). However, the  $\sigma$ -adducts-A lead to the roughly 20 kJ mol<sup>-1</sup> more unfavorable 1,2-adducts-A, due to the collision of the aldehyde residues with the methyl groups in the calix[4]pyrrolato backbone (see figure S101). In turn, the  $\sigma$ -adducts-B lead to more favorable 1,2-adducts-B, as has been observed in all cases by SCXRD (see figure. 3B). Nevertheless, the formation of all four isomers was detected for *p*DMA-BA by <sup>1</sup>H NMR spectroscopy (see section 5). Interestingly, in this case, the difference in computed free energies for the 1,2-adducts-A and B are closest in comparison with the other aldehydes (see figure S105).

For the calculation of the [Li]<sup>+</sup> salts, a single dimethoxyethane molecule was added to the structure for saturation of the Li cation. This motif was also found in various SCXDR structures. For obtaining correct solvent correction values [Li]<sup>+</sup> was calculated as [Li(dme)<sub>3</sub>]<sup>+</sup>. Furthermore, it was found by IRC that the  $\sigma$ -adduct A leads to the 1,2-adduct A and vice versa.

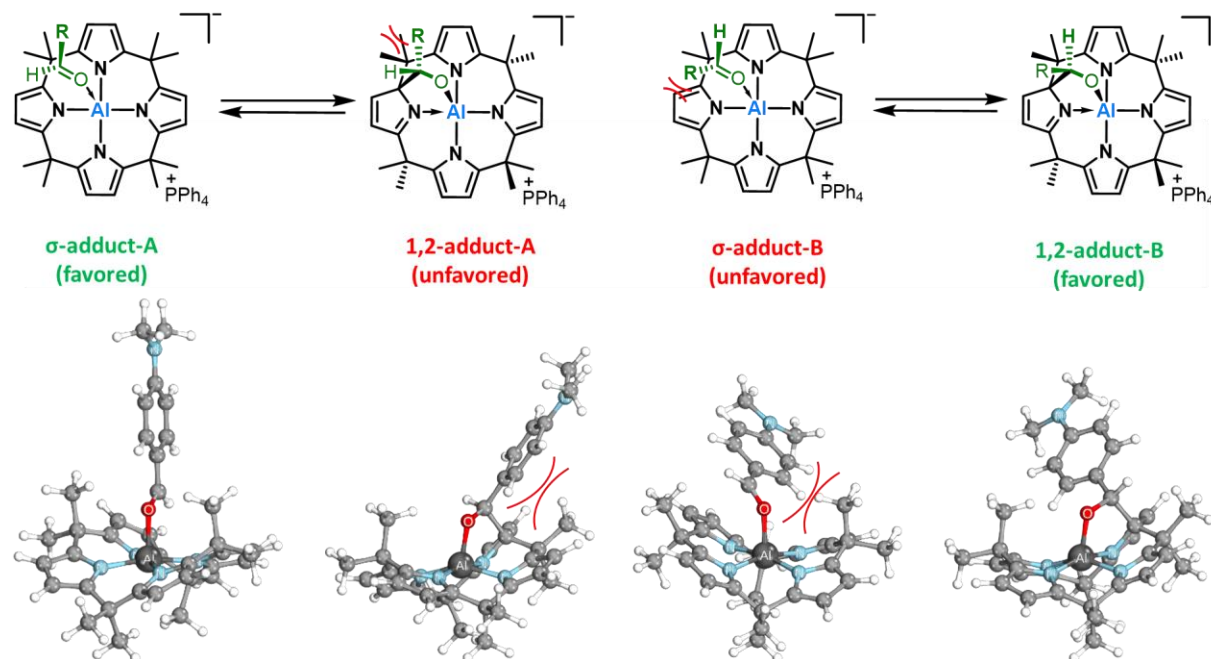

**Figure S 101:** Overview of the different possible adducts of [PPh<sub>4</sub>][1] and *p*-dimethylaminobenzaldehyde and nomenclature of the isomers.

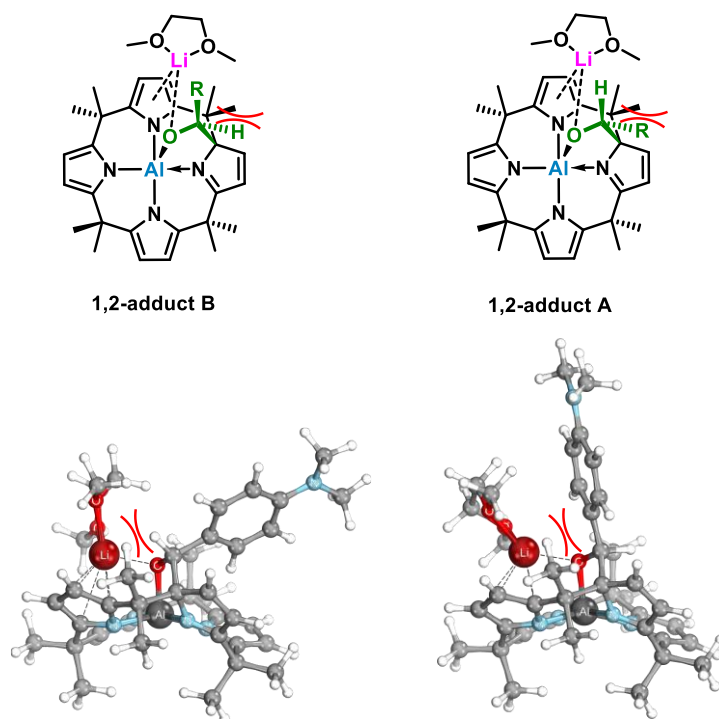

**Figure S 102:** Overview of the different adducts formed between [Li(dme)][1] and *p*-dimethylaminobenzaldehyde.

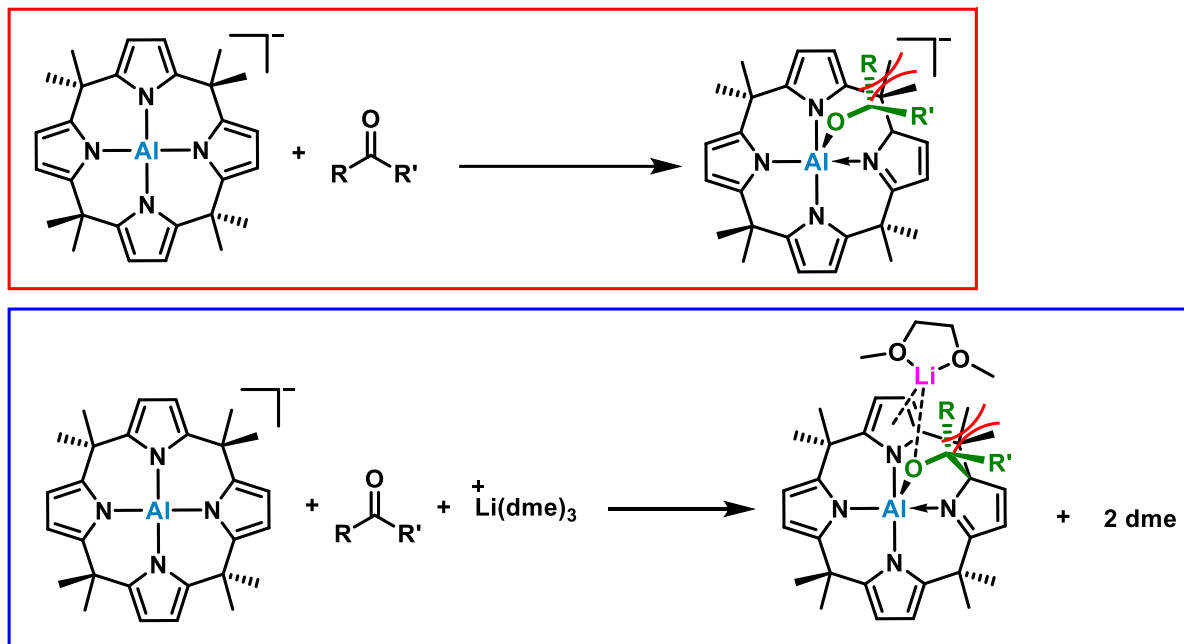

**Figure S 103:** Reactions, that led to  $\Delta_r G$  in Figure S 104. All calculations are minimum structures on PBEh-3c and SP energies are calculated on PW6B95/QZVPP level of theory. Solvent correction was performed with COSMO-RS for dichloromethane in ADF. Colors merge with those in figure S 104.

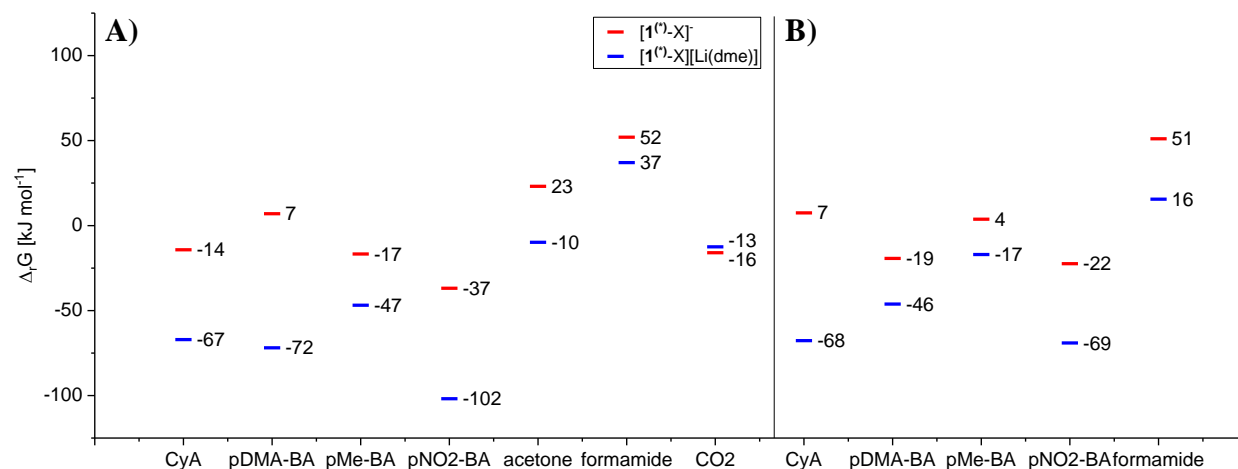

**Figure S 104:** Overview of the free reaction enthalpies for the reactions shown in figure S 103. Red lines:  $\sigma$ -adducts / Blue lines 1,2-adducts +  $Li(dme)_3$   
**A)** shows isomer B, **B)** isomer A.

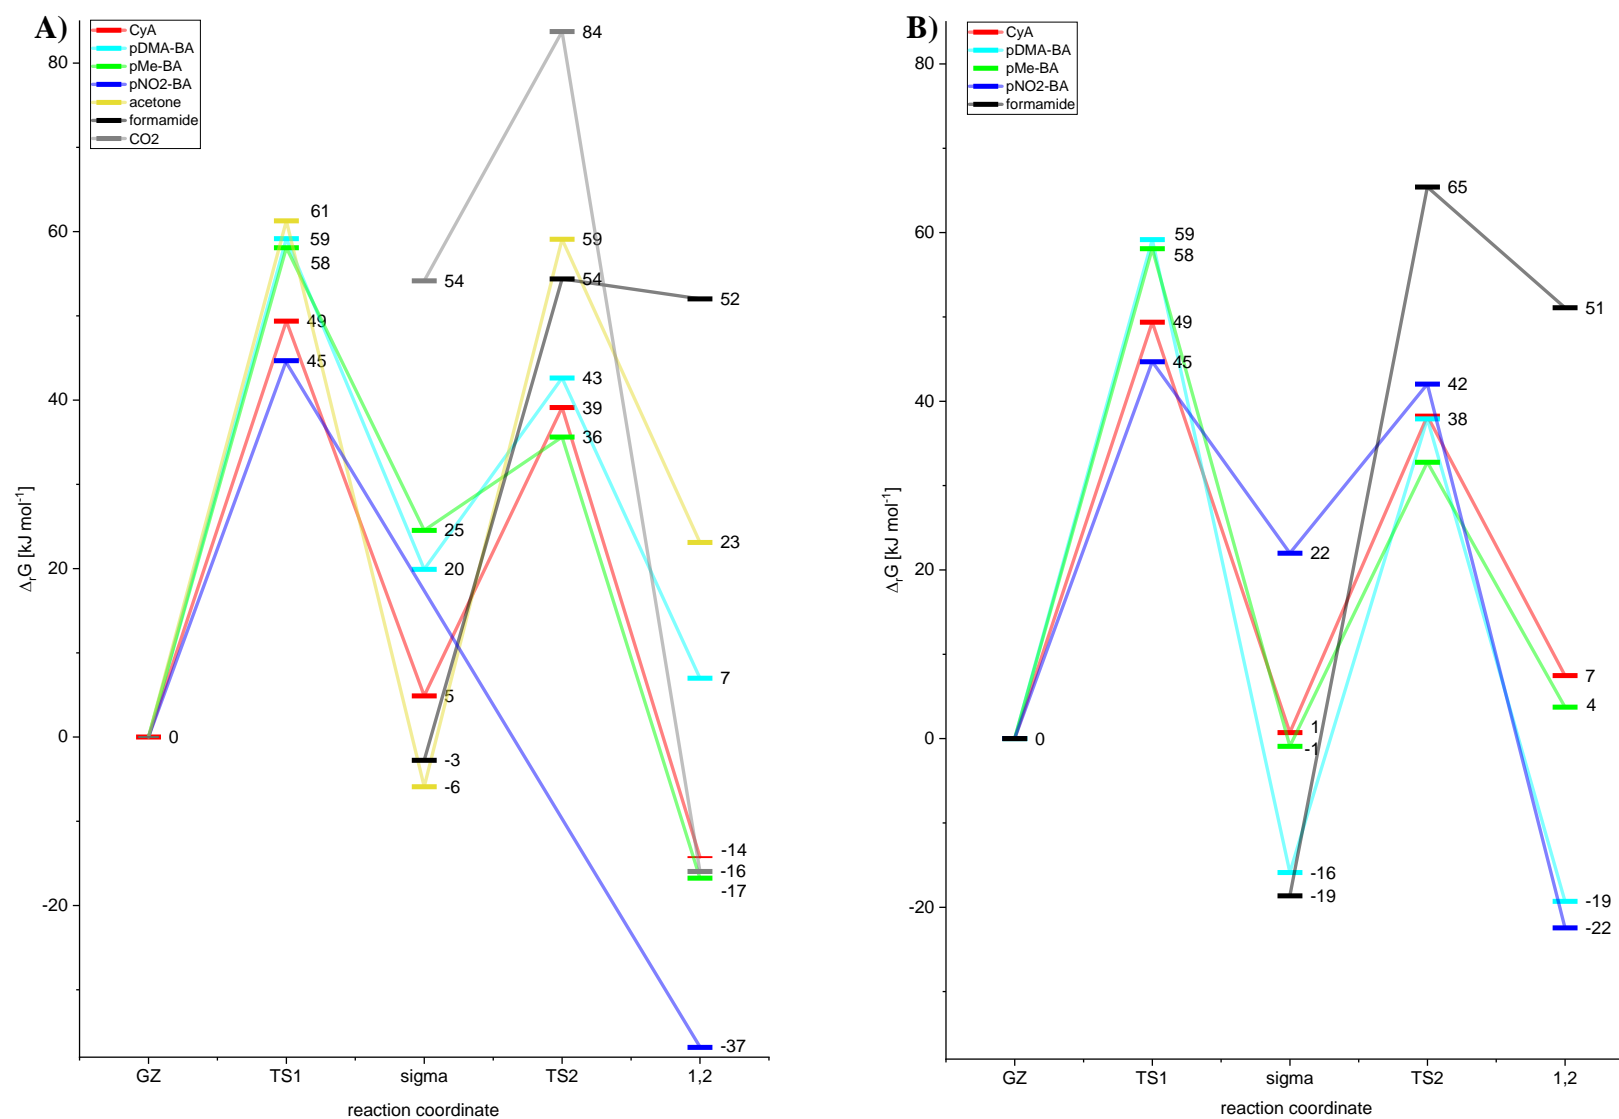

**Figure S 105:** Reaction coordinate for the formation of the □-adduct and the subsequent 1,2-addition product generation calculated on the PW6B95-D3(BJ), COSMO-RS(CH<sub>2</sub>Cl<sub>2</sub>)/def2-QZVP//PBEh-3c level of theory. Energies were calculated for both isomers **A)** isomer B and **B)** isomer A.

### 13. X-ray Crystal Structure Determinations

Crystal data and details of the structure determinations are compiled in the following tables. Intensity data were collected at low temperature with an Enraf Nonius Kappa CCD diffractometer (Mo-K $\alpha$  radiation, sealed X-ray tube, graphite monochromator), or a Bruker AXS D8 Venture diffractometer (Mo-K $\alpha$  radiation, microfocus X-ray tube, multilayer mirror optics). Data were processed with the standard Nonius and Bruker (SAINT, APEX3) software package.<sup>14</sup> Multiscan absorption correction was applied using the SADABS program.<sup>15</sup> The structures were solved by intrinsic phasing<sup>16</sup> and refined using the SHELXTL software package (Version 2018/3).<sup>17</sup> Graphical handling of the structural data during solution and refinement were performed with OLEX2.<sup>18</sup> All non-hydrogen atoms were given anisotropic displacement parameters. Hydrogen atoms were generally input at calculated positions and refined with a riding model. When justified by the quality of the data the positions (and sometimes isotropic temperature factors) of some hydrogen atoms were refined. Split atom models were used to refine disordered groups and/or solvent molecules. The dataset collected for [Li(thf)<sub>2</sub>][1\*-acetone] was not of sufficient quality to warrant detailed publication. However, these structures could be solved and the molecular connectivity unambiguously established. Due to severe disorder and fractional occupancy, electron density attributed to solvent of crystallization was removed from the structures of [1\*-CO<sub>2</sub>][PPh<sub>4</sub>] (dichloromethane), [1\*-dimethylformamide][PPh<sub>4</sub>] (dichloromethane and pentane), [1\*-formamide][PPh<sub>4</sub>] (dichloromethane) and [1\*-*p*-Dimethylaminobenzaldehyde][Li(thf)<sub>2</sub>] (dichloromethane) with the BYPASS procedure,<sup>19</sup> as implemented in PLATON (squeeze/hybrid).<sup>20</sup> Partial structure factors from the solvent masks were included in the refinement as separate contributions to  $F_{\text{calc}}$ . CCDC 1989029-1989036 contains the supplementary crystallographic data for this paper. These data can be obtained free of charge from the Cambridge Crystallographic Data Centre's and FIZ Karlsruhe's joint Access Service via <https://www.ccdc.cam.ac.uk/structures/>.

|                                             |                                                                |                                                                     |                                                                                   |
|---------------------------------------------|----------------------------------------------------------------|---------------------------------------------------------------------|-----------------------------------------------------------------------------------|
| Identification code                         | [1*-Cyclohexanecarboxaldehyde][PPh <sub>4</sub> ]              | [1- <i>p</i> -Dimethylaminobenzaldehyde][PPh <sub>4</sub> ]         | [1*- <i>p</i> -Nitrobenzaldehyde][PPh <sub>4</sub> ]                              |
| Empirical formula                           | C <sub>66</sub> H <sub>72</sub> AlN <sub>4</sub> OP            | C <sub>63</sub> H <sub>67</sub> AlCl <sub>4</sub> N <sub>5</sub> OP | C <sub>60</sub> H <sub>59</sub> AlCl <sub>2</sub> N <sub>5</sub> O <sub>3</sub> P |
| Formula weight                              | 995.22                                                         | 1109.96                                                             | 1026.97                                                                           |
| Temperature/K                               | 121.0                                                          | 100.0                                                               | 100.0                                                                             |
| Crystal system                              | monoclinic                                                     | monoclinic                                                          | monoclinic                                                                        |
| Space group                                 | P2 <sub>1</sub>                                                | P2 <sub>1</sub> /n                                                  | P2 <sub>1</sub> /c                                                                |
| a/Å                                         | 11.5021(5)                                                     | 20.180(6)                                                           | 15.1362(10)                                                                       |
| b/Å                                         | 17.7007(7)                                                     | 13.614(3)                                                           | 16.5731(10)                                                                       |
| c/Å                                         | 14.3727(7)                                                     | 22.998(8)                                                           | 21.0581(13)                                                                       |
| α/°                                         | 90                                                             | 90                                                                  | 90                                                                                |
| β/°                                         | 113.240(2)                                                     | 113.063(14)                                                         | 104.851(3)                                                                        |
| γ/°                                         | 90                                                             | 90                                                                  | 90                                                                                |
| Volume/Å <sup>3</sup>                       | 2688.8(2)                                                      | 5813(3)                                                             | 5106.0(6)                                                                         |
| Z                                           | 2                                                              | 4                                                                   | 4                                                                                 |
| ρ <sub>calc</sub> /g/cm <sup>3</sup>        | 1.229                                                          | 1.268                                                               | 1.336                                                                             |
| μ/mm <sup>-1</sup>                          | 0.116                                                          | 0.292                                                               | 0.229                                                                             |
| F(000)                                      | 1064.0                                                         | 2336.0                                                              | 2160.0                                                                            |
| Crystal size/mm <sup>3</sup>                | 0.35 × 0.2 × 0.2                                               | 0.145 × 0.105 × 0.069                                               | 0.26 × 0.13 × 0.1                                                                 |
| Radiation                                   | MoKα (λ = 0.71073)                                             | MoKα (λ = 0.71073)                                                  | MoKα (λ = 0.71073)                                                                |
| 2θ range for data collection/°              | 3.848 to 60.156                                                | 4.388 to 58                                                         | 3.714 to 58.284                                                                   |
| Index ranges                                | -16 ≤ h ≤ 16, -24 ≤ k ≤ 24, -20 ≤ l ≤ 20                       | -27 ≤ h ≤ 27, -18 ≤ k ≤ 18, -31 ≤ l ≤ 31                            | -20 ≤ h ≤ 20, -22 ≤ k ≤ 22, -28 ≤ l ≤ 28                                          |
| Reflections collected                       | 122966                                                         | 164437                                                              | 227435                                                                            |
| Independent reflections                     | 15758 [R <sub>int</sub> = 0.0702, R <sub>sigma</sub> = 0.0523] | 15455 [R <sub>int</sub> = 0.1530, R <sub>sigma</sub> = 0.0708]      | 13720 [R <sub>int</sub> = 0.0933, R <sub>sigma</sub> = 0.0319]                    |
| Data/restraints/parameters                  | 15758/1/667                                                    | 15455/3/699                                                         | 13720/0/657                                                                       |
| Goodness-of-fit on F <sup>2</sup>           | 1.059                                                          | 1.022                                                               | 1.032                                                                             |
| Final R indexes [I ≥ 2σ (I)]                | R <sub>1</sub> = 0.0408, wR <sub>2</sub> = 0.1001              | R <sub>1</sub> = 0.0607, wR <sub>2</sub> = 0.1254                   | R <sub>1</sub> = 0.0398, wR <sub>2</sub> = 0.0874                                 |
| Final R indexes [all data]                  | R <sub>1</sub> = 0.0607, wR <sub>2</sub> = 0.1058              | R <sub>1</sub> = 0.1134, wR <sub>2</sub> = 0.1591                   | R <sub>1</sub> = 0.0604, wR <sub>2</sub> = 0.0990                                 |
| Largest diff. peak/hole / e Å <sup>-3</sup> | 0.43/-0.34                                                     | 0.95/-1.07                                                          | 0.56/-0.65                                                                        |
| Flack parameter                             | 0.01(3)                                                        |                                                                     |                                                                                   |
| CCDC deposition number                      | 1989032                                                        | 1989036                                                             | 1989033                                                                           |

| Identification code                         | [1*- <i>p</i> -Dimethylaminobenzaldehyde][Li(thf) <sub>2</sub> ]  | [1*-dimethylformamide][PPh <sub>4</sub> ]                      | [1-formanide][PPh <sub>4</sub> ]                                    | [1*-CO <sub>2</sub> ][PPh <sub>4</sub> ]                          |
|---------------------------------------------|-------------------------------------------------------------------|----------------------------------------------------------------|---------------------------------------------------------------------|-------------------------------------------------------------------|
| Empirical formula                           | C <sub>45</sub> H <sub>59</sub> AlLiN <sub>5</sub> O <sub>3</sub> | C <sub>55</sub> H <sub>59</sub> AlN <sub>5</sub> OP            | C <sub>54</sub> H <sub>57</sub> AlCl <sub>2</sub> N <sub>5</sub> OP | C <sub>57</sub> H <sub>60</sub> N <sub>4</sub> O <sub>3</sub> AlP |
| Formula weight                              | 751.89                                                            | 864.02                                                         | 920.89                                                              | 907.04                                                            |
| Temperature/K                               | 100.0                                                             | 100.0                                                          | 293.15                                                              | 120                                                               |
| Crystal system                              | orthorhombic                                                      | triclinic                                                      | triclinic                                                           | triclinic                                                         |
| Space group                                 | P2 <sub>1</sub> 2 <sub>1</sub> 2 <sub>1</sub>                     | P-1                                                            | P-1                                                                 | P-1                                                               |
| a/Å                                         | 8.6388(3)                                                         | 12.1492(6)                                                     | 11.527(16)                                                          | 10.923(2)                                                         |
| b/Å                                         | 20.8824(7)                                                        | 14.4072(7)                                                     | 12.360(17)                                                          | 14.476(3)                                                         |
| c/Å                                         | 24.1541(8)                                                        | 16.3459(9)                                                     | 19.11(3)                                                            | 18.472(4)                                                         |
| α/°                                         | 90                                                                | 80.033(2)                                                      | 90.58(6)                                                            | 87.06(3)                                                          |
| β/°                                         | 90                                                                | 88.754(2)                                                      | 92.72(6)                                                            | 80.80(3)                                                          |
| γ/°                                         | 90                                                                | 65.193(2)                                                      | 106.31(4)                                                           | 68.01(3)                                                          |
| Volume/Å <sup>3</sup>                       | 4357.4(3)                                                         | 2553.8(2)                                                      | 2609(7)                                                             | 2673.5(11)                                                        |
| Z                                           | 4                                                                 | 2                                                              | 2                                                                   | 2                                                                 |
| ρ <sub>calc</sub> /cm <sup>3</sup>          | 1.146                                                             | 1.124                                                          | 1.172                                                               | 1.127                                                             |
| μ/mm <sup>-1</sup>                          | 0.090                                                             | 0.113                                                          | 0.213                                                               | 0.113                                                             |
| F(000)                                      | 1616.0                                                            | 920.0                                                          | 972.0                                                               | 964.0                                                             |
| Crystal size/mm <sup>3</sup>                | 0.199 × 0.192 × 0.148                                             | 0.23 × 0.13 × 0.12                                             | 0.212 × 0.2 × 0.135                                                 | 0.35 × 0.2 × 0.15                                                 |
| Radiation                                   | MoKα (λ = 0.71073)                                                | MoKα (λ = 0.71073)                                             | MoKα (λ = 0.71073)                                                  | MoKα (λ = 0.71073)                                                |
| 2θ range for data collection/°              | 3.896 to 61.094                                                   | 3.7 to 55.098                                                  | 4.088 to 55.038                                                     | 4.068 to 49.998                                                   |
| Index ranges                                | -12 ≤ h ≤ 12, -28 ≤ k ≤ 29, -34 ≤ l ≤ 34                          | -15 ≤ h ≤ 15, -18 ≤ k ≤ 18, -21 ≤ l ≤ 21                       | -14 ≤ h ≤ 14, -16 ≤ k ≤ 16, -24 ≤ l ≤ 24                            | -12 ≤ h ≤ 12, -17 ≤ k ≤ 17, -21 ≤ l ≤ 21                          |
| Reflections collected                       | 185155                                                            | 90418                                                          | 117792                                                              | 16040                                                             |
| Independent reflections                     | 13335 [R <sub>int</sub> = 0.0572, R <sub>sigma</sub> = 0.0244]    | 11733 [R <sub>int</sub> = 0.0844, R <sub>sigma</sub> = 0.0441] | 11945 [R <sub>int</sub> = 0.0598, R <sub>sigma</sub> = 0.0271]      | 9230 [R <sub>int</sub> = 0.0934, R <sub>sigma</sub> = 0.1816]     |
| Data/restraints/parameters                  | 13335/5/529                                                       | 11733/0/578                                                    | 11945/0/593                                                         | 9230/0/603                                                        |
| Goodness-of-fit on F <sup>2</sup>           | 1.034                                                             | 1.029                                                          | 1.069                                                               | 0.953                                                             |
| Final R indexes [I >= 2σ (I)]               | R <sub>1</sub> = 0.0335, wR <sub>2</sub> = 0.0842                 | R <sub>1</sub> = 0.0487, wR <sub>2</sub> = 0.1223              | R <sub>1</sub> = 0.0431, wR <sub>2</sub> = 0.1011                   | R <sub>1</sub> = 0.0689, wR <sub>2</sub> = 0.1499                 |
| Final R indexes [all data]                  | R <sub>1</sub> = 0.0386, wR <sub>2</sub> = 0.0875                 | R <sub>1</sub> = 0.0665, wR <sub>2</sub> = 0.1353              | R <sub>1</sub> = 0.0537, wR <sub>2</sub> = 0.1069                   | R <sub>1</sub> = 0.1859, wR <sub>2</sub> = 0.1926                 |
| Largest diff. peak/hole / e Å <sup>-3</sup> | 0.23/-0.18                                                        | 0.51/-0.46                                                     | 0.62/-0.99                                                          | 0.24/-0.25                                                        |
| Flack parameter                             | 0.13(3)                                                           |                                                                |                                                                     |                                                                   |
| CCDC deposition number                      | 1989030                                                           | 1989031                                                        | 1989034                                                             | 1989029                                                           |

|                                             |                                                                |
|---------------------------------------------|----------------------------------------------------------------|
| Identification code                         | [1*- <i>p</i> -Methylbenzaldehyde][PPh <sub>4</sub> ]          |
| Empirical formula                           | C <sub>60</sub> H <sub>60</sub> AlN <sub>4</sub> OP            |
| Formula weight                              | 911.07                                                         |
| Temperature/K                               | 120                                                            |
| Crystal system                              | monoclinic                                                     |
| Space group                                 | P2 <sub>1</sub> /n                                             |
| a/Å                                         | 11.516(2)                                                      |
| b/Å                                         | 26.230(5)                                                      |
| c/Å                                         | 18.872(4)                                                      |
| α/°                                         | 90                                                             |
| β/°                                         | 97.34(3)                                                       |
| γ/°                                         | 90                                                             |
| Volume/Å <sup>3</sup>                       | 5654(2)                                                        |
| Z                                           | 4                                                              |
| ρ <sub>calc</sub> /g/cm <sup>3</sup>        | 1.070                                                          |
| μ/mm <sup>-1</sup>                          | 0.105                                                          |
| F(000)                                      | 1936.0                                                         |
| Crystal size/mm <sup>3</sup>                | 0.2 × 0.18 × 0.15                                              |
| Radiation                                   | MoKα (λ = 0.71073)                                             |
| 2θ range for data collection/°              | 4.408 to 55                                                    |
| Index ranges                                | -14 ≤ h ≤ 14, -32 ≤ k ≤ 34, -24 ≤ l ≤ 24                       |
| Reflections collected                       | 25253                                                          |
| Independent reflections                     | 12950 [R <sub>int</sub> = 0.1301, R <sub>sigma</sub> = 0.1850] |
| Data/restraints/parameters                  | 12950/0/613                                                    |
| Goodness-of-fit on F <sup>2</sup>           | 0.919                                                          |
| Final R indexes [I >= 2σ (I)]               | R <sub>1</sub> = 0.0652, wR <sub>2</sub> = 0.1316              |
| Final R indexes [all data]                  | R <sub>1</sub> = 0.1747, wR <sub>2</sub> = 0.1650              |
| Largest diff. peak/hole / e Å <sup>-3</sup> | 0.26/-0.32                                                     |
| CCDC deposition number                      | 1989035                                                        |

## 14. Appendix

## Calculated molecular structures (PBEh-3c)

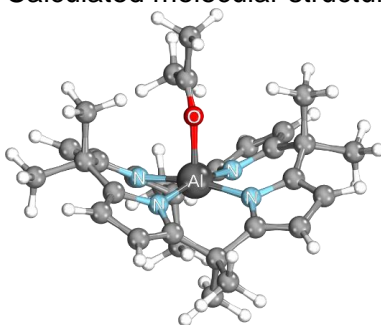[1]-acetone sigma adduct

|    |                    |                    |                   |
|----|--------------------|--------------------|-------------------|
| N  | -0.18339812152414  | -2.18398769078147  | 0.35021274112398  |
| C  | -0.85769550386692  | -3.20968480862822  | 0.96867825107548  |
| C  | 0.19304186043066   | -2.63274775512337  | -0.88471627609443 |
| C  | -0.94645804538349  | -4.27899722279143  | 0.10141736330744  |
| H  | -1.40134784653133  | -5.23655912948497  | 0.30528063270965  |
| C  | -0.26700556996119  | -3.91299729536645  | -1.08172816470665 |
| H  | -0.11567150405548  | -4.52751466952192  | -1.95569785808034 |
| N  | -0.12923566932552  | -0.97098785913065  | 2.74680536887963  |
| C  | 0.41620687581706   | -0.29904790110117  | 3.80826616580689  |
| C  | -0.64440744256709  | -2.14717935651228  | 3.23759595466179  |
| C  | 0.22713135415756   | -0.10604942500312  | 4.96395203696507  |
| C  | -0.45503888754747  | -2.19548213036022  | 4.59941283864308  |
| H  | -0.75724355072084  | -2.98880712282420  | 5.26563393911938  |
| N  | 0.02513427798074   | 1.50901835494243   | 1.49700775705913  |
| C  | -0.34007070281553  | 2.64753984118995   | 0.81862601679828  |
| C  | 0.56049576614872   | 1.90971266073609   | 2.69230850674634  |
| C  | -0.06749080780506  | 3.74949396205570   | 1.59578807142400  |
| H  | -0.25052349606728  | 4.78157563442733   | 1.33935730950275  |
| C  | 0.51245764043831   | 3.27835328760030   | 2.79202860571452  |
| H  | 0.87159981083114   | 3.8791088688103    | 3.61293662532356  |
| N  | -0.03349741314089  | 0.30991879354561   | -0.90596407509216 |
| C  | 0.31817894008490   | -0.45402193678509  | -1.98396618502259 |
| C  | -0.57701523261061  | 1.4749728630536    | -1.39205144719631 |
| C  | -0.03294763454782  | 0.18600220281376   | -3.14930369073520 |
| H  | 0.12931868424805   | -0.16826725200894  | -4.15558367256870 |
| C  | -0.61222397755321  | 1.41674669886370   | -2.76948432011146 |
| H  | -0.96769067629653  | 2.18690648675164   | -3.43710493965107 |
| H  | 0.25015827627525   | -2.65254567393069  | -3.63306859280886 |
| C  | 1.20543720037912   | -2.46007292099070  | -3.14352661708493 |
| C  | 2.41081948203209   | -1.54031047335983  | -1.16392113825583 |
| C  | 1.01542518131935   | -1.76942461872805  | -1.79590501392384 |
| H  | 2.92574165408716   | -2.49231467651135  | -1.03937479861779 |
| H  | 1.72028359849363   | -3.41334561854001  | -3.01578665023998 |
| H  | 2.35910770477631   | -1.04839596479638  | -0.21234120288760 |
| H  | 3.18589569139647   | -2.00978414099009  | 2.29380517380403  |
| C  | -2.86967700403463  | -3.02735231286688  | 2.50584976711206  |
| C  | -0.101659757845628 | -4.57751925911500  | 3.0045450621273   |
| H  | -1.33687419094278  | -3.19547076727712  | 2.40429658274306  |
| H  | 0.05183128094667   | -4.78137966724798  | 2.95978538279895  |
| H  | -3.38510367049425  | -3.70796626117960  | 1.82327827413946  |
| H  | -1.53945790942541  | -5.368526787659405 | 2.46537086650138  |
| H  | 3.23012361226457   | 1.42249186270032   | 2.85261470929073  |
| C  | 2.60348107758127   | 0.54041529374554   | 3.0080083703130   |
| C  | 1.51604432631271   | 1.60159111588659   | 4.95925234544583  |
| C  | 1.24128729045179   | 0.93833276923580   | 3.61083628845610  |
| H  | 2.04370505548981   | 0.91723804083485   | 5.62473726749396  |
| H  | 2.48792748930183   | 0.05666044517651   | 2.02961315908514  |
| H  | 0.58933894674905   | 1.90799371471184   | 5.44568141669098  |
| C  | -0.97768603624622  | 2.66490594067398   | -0.54720649388891 |
| C  | -2.51160840745938  | 2.79599661877169   | -0.41437807517476 |
| C  | -0.50163507798511  | 3.92948641612084   | -1.28671849248017 |
| H  | -2.99880659258099  | 2.69904543255347   | -1.38799303699327 |
| H  | -0.98005475373821  | 4.01407646273162   | -2.26330272113358 |
| H  | -2.92811844612822  | 2.05639638028130   | 0.26347401319196  |
| H  | 0.57672771560306   | 3.90972710403578   | -1.43446394223332 |
| H  | -2.76574142417614  | 3.77315501929571   | 0.00146575306841  |
| H  | -0.75685793526939  | 4.83021042364568   | -0.72774707515797 |
| H  | 3.01566806759939   | -0.90757433756851  | -1.83672466108571 |
| H  | 1.80997018425280   | -1.84169646399021  | -3.80856658065943 |
| H  | -1.33555353600478  | -4.63654809646048  | 4.04551704789932  |
| H  | -3.20033022976925  | -3.24610393584157  | 3.232544513146440 |
| H  | 2.14623073218300   | 2.48297986994449   | 4.8340506790824   |
| H  | 3.12603072107870   | -0.16172444891652  | 3.65398076509626  |
| H  | 0.55879199906081   | -0.74474971108330  | 5.95400414014981  |
| Al | -0.29630391888248  | -0.31630557193331  | 0.93029598468056  |
| O  | -2.24747616960241  | -0.23902838493298  | 0.84470570194310  |
| C  | -3.12474479608025  | -0.59196447176790  | 0.06547955251609  |
| C  | -2.87300970385342  | -1.30839317284306  | -1.21082113046896 |
| H  | -2.16206733461097  | -0.76161718798195  | -1.83457300565627 |
| H  | -3.79856057110134  | -1.45947580399365  | -1.76324601860975 |
| H  | -2.41785101270321  | -2.28254357030262  | -1.00505948909315 |
| H  | -4.54676984167800  | -0.29606639877109  | 0.41956018749832  |
| H  | -4.62904124992310  | 0.19665766021156   | 1.38461912736276  |
| H  | -5.11909583087815  | -1.22591826113296  | 0.42748923982866  |
| H  | -4.98264121081756  | 0.33828869150890   | -0.35543612243355 |

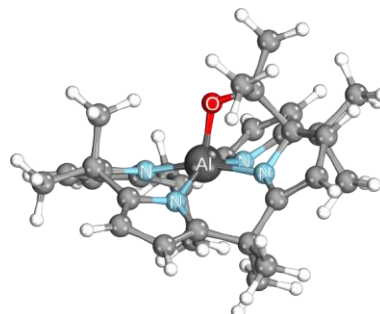[1]-acetone 1,2 adduct

|    |                    |                   |                   |
|----|--------------------|-------------------|-------------------|
| N  | -0.16832396684232  | -2.21960194672633 | 0.306602727283891 |
| C  | 0.26337131201928   | -3.17746872437028 | 1.18730727324562  |
| C  | -0.44256960273859  | -2.85448114463988 | -0.87347839523542 |
| C  | 0.26824108961520   | -4.40960168104196 | 0.57448171494810  |
| H  | 0.56680469260707   | -5.35083437308623 | 1.01087736518025  |
| C  | -0.18359699351348  | -4.20249225453221 | -0.74594028682017 |
| H  | -0.30757719102218  | -4.95920031711576 | -1.50457311684282 |
| N  | -0.58994990461377  | -0.84622921673499 | 2.53239253980423  |
| C  | -1.61136836597666  | -0.09554527059209 | 3.20839848527030  |
| C  | -0.2796741200311   | -1.90146216498892 | 3.18159692585941  |
| C  | -1.85784643126926  | -0.90774223767712 | 4.43445384223405  |
| C  | -1.05113807059456  | -1.97976517777730 | 4.41952515977326  |
| H  | -0.99337349928607  | -2.77123266016918 | 5.15128429198401  |
| N  | 0.07564470171648   | 1.44743147566800  | 1.23558374647937  |
| C  | 0.43752292254319   | 2.44895499395216  | 0.37928724954804  |
| C  | -0.57365059458595  | 2.04320002949520  | 2.29382070141179  |
| C  | 0.03297292586886   | 3.66626678209614  | 0.87699755877843  |
| H  | 0.18130480302831   | 4.63344907056335  | 0.42277664571509  |
| C  | -0.62012582814012  | 3.40405786317495  | 2.10268746469465  |
| H  | -1.04765809256396  | 4.13764032428411  | 2.76977182109498  |
| N  | -0.06939306073324  | 0.04076496717050  | -1.22634652851849 |
| C  | -0.35718270825898  | -0.80042294114182 | -2.26977350066233 |
| C  | 0.56583244867605   | 1.3666568264753   | -1.74270581023211 |
| C  | 0.06510991913280   | -0.22728940389030 | -3.46607119821063 |
| H  | -0.02385673644199  | -0.64525516175641 | -4.43689298028244 |
| C  | 0.65736954888232   | 1.01133670250218  | -3.10882415557941 |
| H  | 1.11840179410981   | 1.70845195893206  | -3.79174499918615 |
| H  | -2.79604894494279  | -1.33895435897271 | -1.01921219866577 |
| C  | -2.55237888175039  | -1.95641695337317 | -1.88057092138641 |
| C  | -0.82840315050595  | -2.99264337823544 | -3.31709543192736 |
| C  | -1.03035741279897  | -2.13420134443453 | -2.06599449906574 |
| H  | -1.33309117307721  | -3.95399511395398 | -3.21066484723249 |
| H  | -0.303190193879427 | -2.92934561214149 | -1.74565683500884 |
| H  | 0.22837312612879   | -3.17628670514472 | -3.51015921517572 |
| H  | -0.13479089261338  | -6.65218830397396 | 3.48183978880739  |
| C  | 0.817111543844836  | -4.12203083188005 | 3.43839690457023  |
| C  | 0.209619648668223  | -2.16470205507624 | 2.57510859378153  |
| C  | 0.71876907238174   | -2.85511379860075 | 2.59272364623358  |
| H  | 2.08238075682195   | -1.25665460553320 | 1.97319716234358  |
| H  | 1.56804551551119   | -4.80162153222333 | 3.01658403697556  |
| H  | 2.83235629893806   | -2.84054620550289 | 2.13914325421023  |
| H  | 1.09206399587160   | 0.52813117114900  | 3.78601645383548  |
| C  | 0.34374172072097   | 1.07696035173380  | 4.35321769513166  |
| H  | -1.85271621610671  | 2.15679714242067  | 4.44973386911981  |
| C  | -0.95727927714034  | 1.30040584312809  | 3.54771826373700  |
| H  | -2.12904798071628  | 1.61695061832555  | 5.35739680252177  |
| H  | 0.17143219953421   | 0.55958008681922  | 5.30018133758537  |
| H  | -2.76170570459354  | 2.49905699374987  | 3.96707095249298  |
| C  | 1.23484610950022   | 2.15958487146183  | -0.86090882833498 |
| C  | 1.45973291948239   | 3.45145784514264  | -1.6449589399876  |
| C  | 2.61601023926401   | 1.61237186622663  | -0.43993668687833 |
| H  | 2.08416081535227   | 3.26782087979846  | -2.51985743157427 |
| H  | 3.23284911011987   | 1.41805709925027  | -1.31963744810222 |
| H  | 0.51556209752392   | 3.87634903288067  | -1.98567760989261 |
| H  | 2.51825627622398   | 0.67469224785297  | 0.10749780372175  |
| H  | 1.97092277281238   | 4.19295434288236  | -1.02852965728248 |
| H  | 3.13500264971184   | 2.32477776651642  | 0.20623814418327  |
| H  | -1.25751162727126  | -2.50023094236254 | -4.19056114394683 |
| H  | -2.98001452970452  | -1.47757946098037 | -2.7645565103675  |
| H  | 2.42534271350102   | -1.89552195260077 | 3.58263931033182  |
| H  | 1.13377496581343   | -3.8890808346292  | 4.45743081686690  |
| H  | -1.30153699126389  | 3.04240822959208  | 4.76717810350540  |
| H  | 0.77334302846711   | 2.05341620516457  | 4.57766183164588  |
| H  | -2.57382407670481  | -0.65818251136888 | 5.20419286175034  |
| Al | -0.54538098159390  | -0.3008030718829  | 0.59259597295139  |
| O  | -2.28887963943307  | -0.02366026935219 | 0.86442322245672  |
| C  | -2.81764950310320  | -0.14351616881016 | 2.12732612171287  |
| C  | -3.85221292087846  | 0.95873188929335  | 2.33862385587553  |
| H  | -3.42481598279092  | 1.93658829246935  | 2.12357811306899  |
| H  | -4.27751560897898  | 0.95689325170465  | 3.344940080560707 |
| H  | -4.66903328931205  | 0.7986033498254   | 1.63246062338371  |
| C  | -3.52728480616209  | -1.50201776906272 | 2.24544128616744  |
| H  | -2.83742424740444  | -2.33944074341773 | 2.1331303263248   |
| H  | -4.24820391831238  | -1.57327062082559 | 1.42965851529403  |
| H  | -4.06968734853288  | -1.62277104731168 | 3.18636153493730  |

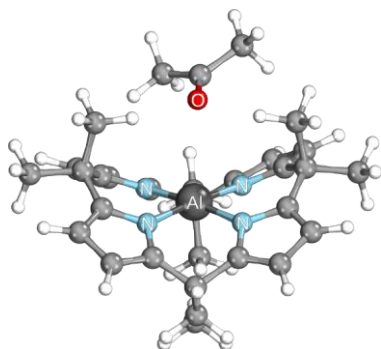**[1]-acetone TS 1**

|    |                   |                   |                    |
|----|-------------------|-------------------|--------------------|
| N  | 0.85649322594930  | -0.73191915520189 | 1.80569927400644   |
| C  | 2.18010499593805  | -0.36817430613194 | 1.72207148861235   |
| C  | 0.62642396887127  | -1.13247502976856 | 3.09697886177701   |
| C  | 2.77348426450377  | -0.53208043056816 | 2.95194034719401   |
| H  | 3.80425237726472  | -0.33282044101080 | 3.19959603019045   |
| C  | 1.78196245760496  | -1.02813872367731 | 3.82937020050401   |
| H  | 1.91100148455920  | -1.27970996936653 | 4.87059590836277   |
| N  | 0.99646105039064  | -1.00508405297581 | -0.86152845078705  |
| C  | 0.89278491888673  | -1.6803732265927  | -0.05499202473475  |
| C  | 2.31528028002147  | -0.63558788235089 | -0.72628621870179  |
| C  | 2.11376692277442  | -1.71575218233898 | -0.267609279012120 |
| C  | 3.02258808698888  | -1.04213587760254 | -1.82821536227185  |
| H  | 4.07416255553920  | -0.88638818156846 | -2.01099631956151  |
| N  | -1.74080697273895 | -0.86776992078116 | -1.01845538478178  |
| C  | -3.02634792798331 | -0.37440062149398 | -1.02882656408177  |
| C  | -1.57654440945499 | -1.57656731449245 | -2.18534351708206  |
| C  | -3.65083225833294 | -0.74785528806622 | -2.19189777988534  |
| H  | -4.65627497475086 | -0.49769890041335 | -2.49176486793328  |
| C  | -2.72606211213623 | -1.52025792095166 | -2.92903192434235  |
| C  | -2.90023578281523 | -1.99373095756209 | -3.88244739076473  |
| N  | -1.88683506562983 | -0.52397813987447 | 1.63369784260820   |
| C  | -1.81185812521470 | -0.79812952049381 | 2.97402668427328   |
| C  | -3.08361097905827 | 0.11339560042788  | 1.40946220840837   |
| C  | -2.92934204953474 | 0.31459245471569  | 3.60890784890107   |
| H  | -3.16741686338458 | -0.40912718981891 | 4.65722658760458   |
| C  | -3.74143477848542 | 0.26974047991543  | 2.60836555072028   |
| H  | -4.71117955809135 | 0.71955778299068  | 2.75614461943156   |
| H  | -0.67621326555603 | -0.72305682725269 | 5.48625079810483   |
| C  | -0.79539285904815 | -1.71331268257679 | 5.04529019502383   |
| C  | -0.88952150229786 | -3.10365561524839 | 2.99849552274931   |
| C  | -0.71205245785535 | -1.66231946128440 | 3.52144134660296   |
| H  | -0.10364666702382 | -0.75143208794638 | 3.39172531663016   |
| H  | -0.01805769379663 | -2.36096085817456 | 5.45225159863057   |
| H  | -0.83734009206355 | -3.15725739305915 | 1.90962939046918   |
| H  | 1.50127412678398  | 1.85527164464032  | 0.07027404236013   |
| C  | 2.55212945087562  | 1.64464670913045  | 0.24029647821484   |
| C  | 4.33780759798345  | -0.02799471926447 | 0.56459810619419   |
| C  | 2.81967395156235  | 0.1419535864039   | 0.45571015841595   |
| H  | 4.61314214231789  | -1.07159838627389 | 0.71283350516273   |
| H  | 2.87139190248748  | 2.22356138528210  | 1.110466727770451  |
| H  | 4.73128146923667  | 0.55562351428157  | 1.39811806390598   |
| H  | -1.35888115363098 | -4.26460214268472 | -1.84724853585801  |
| C  | -0.45646783500750 | -3.70648439555309 | -1.58988773106736  |
| C  | -0.29851109213785 | -2.62712143695483 | -3.90230207338505  |
| C  | -0.35943664982825 | -2.41488036748653 | -2.43248561497308  |
| H  | 0.56651411204328  | -3.46427029891782 | -4.08900874827047  |
| H  | -0.50143235645847 | -3.49492488641833 | -0.51949440181396  |
| H  | -0.23183107682658 | -1.95633144777391 | -4.55410061709596  |
| C  | -3.57744076049458 | 0.52437708278868  | 0.04290559604561   |
| C  | -3.22672020326729 | 1.98773786292837  | -0.29429980964772  |
| C  | -5.10913205775801 | 0.42460510494082  | 0.03755119691876   |
| H  | -3.61397849034802 | 2.66297653697317  | 0.47249251002193   |
| H  | -5.54331484523600 | 1.09359714516846  | 0.78142881326766   |
| H  | -2.15540413143074 | 2.14680277096806  | -0.36885311535213  |
| H  | -5.44080251935006 | -0.59029152667942 | 0.25253320361004   |
| H  | -3.67461058585583 | 2.25870565073747  | -1.25246654508137  |
| H  | -5.51341365822926 | 0.72417074275240  | -0.92986256741356  |
| H  | -1.86149979030664 | -3.50381648060065 | 3.29380637374310   |
| H  | -1.75746499283346 | -2.11645159371790 | 5.36419480820097   |
| H  | 4.83060679321987  | 0.33466633459423  | -0.33804505909605  |
| C  | 3.10647795489903  | 1.99490340510321  | -0.63304178450520  |
| H  | -1.18544049137026 | -3.39784043546170 | -4.17982413005555  |
| H  | 0.41610385504321  | -4.34142760266132 | -1.75585587344040  |
| H  | 2.34411955623967  | -2.19027583913600 | -3.61702922359909  |
| Al | -0.43669338668959 | -0.69298144584831 | 0.37999415979680   |
| O  | -0.46911169188521 | 2.10454718861067  | 1.31288875436419   |
| C  | -0.60405957580970 | 2.50070460754051  | 2.44739744792559   |
| C  | 0.37621913904238  | 2.20129873303307  | 3.54207595139223   |
| H  | -0.13197876379933 | 1.6485758938895   | 4.33429131006861   |
| H  | 0.73091352857541  | 3.13660225740246  | 3.98316576276408   |
| H  | 1.22159795471607  | 1.61327608248960  | 3.1946002822249    |
| H  | -1.81231790222293 | 3.31007074680934  | 2.84557769304612   |
| H  | -2.16781925042366 | 3.91831641158753  | 2.01626063366350   |
| H  | -1.62540847490730 | 3.93824988994724  | 3.71616968338601   |
| H  | -2.60326396474045 | 2.59861381124894  | 3.09874176744391   |

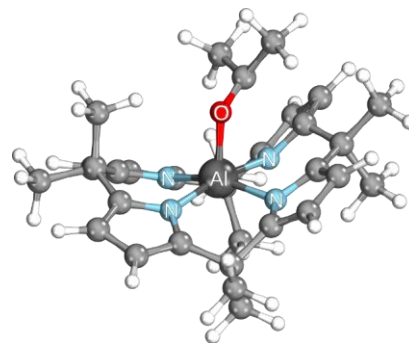**[1]-acetone TS 2**

|    |                   |                   |                   |
|----|-------------------|-------------------|-------------------|
| N  | -0.11368780618160 | -2.30337505064723 | 0.37503504439020  |
| C  | -0.44179937419357 | -3.44462352533623 | 1.06370964255491  |
| C  | 0.32258027363620  | -2.69988285120240 | -0.86304216428563 |
| C  | -0.22168416100918 | -4.54518191630543 | 0.26617567103851  |
| H  | -0.38732478462033 | -5.57742216665901 | 0.53131840801032  |
| C  | 0.26811905015285  | -4.06853197086637 | -0.9677232871316  |
| H  | 0.55742583587359  | -4.66394018106637 | -1.82011358001060 |
| N  | -0.07198290929627 | -1.11999375197481 | 2.83723116141212  |
| C  | 0.47817872566521  | -0.42043751247970 | 3.87896272622674  |
| C  | -0.37312542347270 | -2.37474666639851 | 3.30826770799254  |
| C  | 0.51463458960505  | -1.20968434592758 | 5.00187430416322  |
| C  | -0.03336033091762 | -2.45919089028221 | 4.63741605052935  |
| H  | -0.15364376111371 | -3.31648793321865 | 5.28115936123999  |
| N  | -0.0851089256179  | 1.38039156416244  | 1.52667535385265  |
| C  | -0.79437346333312 | 2.40240742944773  | 0.93207062327436  |
| C  | 0.2038986664495   | 1.7901502631469   | 2.79934160386282  |
| C  | -0.97110953573618 | 3.42583010369801  | 1.83259514136456  |
| H  | -1.46410862868918 | 4.36877767406867  | 1.64861977226044  |
| C  | -0.32433927688442 | 3.03684563382230  | 3.02867867622444  |
| H  | -0.25352144902581 | 3.61161703168034  | 3.93888947393699  |
| N  | -0.39602662387268 | 0.12731148435361  | -0.86933235031200 |
| C  | -0.12560186598644 | -0.56979764553186 | -1.95839954059184 |
| C  | -1.32355649124978 | 1.11631804676996  | -1.19015466799106 |
| C  | -0.86223536452332 | -0.07237788402801 | -3.05764390271087 |
| H  | -0.86796318637692 | -0.47512761128807 | -4.05847316008722 |
| C  | -1.60144910831608 | 0.98579397564764  | -2.57461767726171 |
| H  | -2.25132924872113 | 1.62977551750013  | -3.14959745571700 |
| H  | 0.01676106463329  | -2.81145454060079 | -3.58612985001088 |
| C  | 0.96484943657941  | -2.38943609538112 | -3.25150478181203 |
| C  | 2.21821632102983  | -1.18814327996338 | -1.47399333359923 |
| C  | 0.83175404062441  | -1.72107344765330 | -1.88585167443214 |
| H  | 2.92793320091474  | -2.01448600383710 | -1.41339582835617 |
| H  | 1.69542729350674  | -3.19746627174706 | -3.21131403830518 |
| H  | 2.19376755851871  | -0.7033662689283  | -0.49834614687249 |
| H  | -2.82850974127243 | -2.28541576545612 | 2.0074884349697   |
| C  | -2.54716968997913 | -3.25126480759117 | 2.41648256720669  |
| C  | -0.76198738467453 | -4.80813793277558 | 3.10242605958115  |
| C  | -1.01558164584352 | -3.44001189417656 | 2.45939757995941  |
| H  | 0.30332157493152  | -5.02726456075905 | 3.16546212197793  |
| H  | -3.00741610234282 | -4.02972739348874 | 1.80266335183583  |
| H  | -1.24514543958483 | -5.60071735106802 | 2.52961409072732  |
| H  | 2.91940365219213  | 1.79810818619321  | 2.90380750201624  |
| C  | 2.46675394086205  | 0.81515982065433  | 3.05465535177752  |
| C  | 1.23628360266908  | 1.6338867383906   | 5.04743868155192  |
| C  | 1.06764004831083  | 0.94945162448458  | 3.69236156854437  |
| H  | 1.90759986053049  | 1.06117181141311  | 5.68831366981643  |
| H  | 2.41954895028649  | 0.32126118852855  | 2.08376148955305  |
| H  | 0.28055756689045  | 1.73507656984516  | 5.56171997659887  |
| C  | -1.03837561093088 | 2.47361066205835  | -0.55153575504883 |
| C  | -2.10002071532910 | 3.51875628679128  | -0.89791559099635 |
| C  | 0.28437122762508  | 2.96969410181288  | -1.19209263374469 |
| H  | -2.26171116512305 | 3.56747704260060  | -1.97617232248408 |
| H  | 0.18675406540085  | 3.07418985290446  | -2.27590723406835 |
| H  | -3.05777958185736 | 3.3771426796246   | -0.41893422101894 |
| H  | 1.09869962534258  | 2.27704267849489  | -0.98631389803439 |
| H  | -1.76319081905439 | 4.50768059278944  | -0.58591205712904 |
| H  | 0.55770474135134  | 3.93825513551000  | -0.76971074493128 |
| H  | 2.59132220250000  | -0.45817484624150 | -2.19664686871929 |
| H  | 1.30779925004766  | -1.6727506119925  | -4.00015651569903 |
| H  | -1.18189397117180 | -4.84237616269735 | 4.10822213964020  |
| H  | -2.95909636799684 | -3.31414240181715 | 3.42621215461299  |
| H  | 1.66939829817141  | 2.62783818907022  | 4.92357118808638  |
| C  | 3.12039356526002  | 0.21972180131934  | 3.69529187802712  |
| H  | 0.90174364196066  | -0.93527867342806 | 5.97097521272885  |
| Al | -0.43545720648960 | -0.48686140894168 | 1.05474545673841  |
| O  | -2.27588131524254 | -0.28141839738215 | 0.99047044706220  |
| C  | -2.92495449765018 | -0.01923147593405 | -0.07599463897857 |
| C  | 3.18753909090065  | -1.13269834563966 | -1.04547142901939 |
| H  | -2.28606526052041 | -1.65877314078039 | -1.35686604669824 |
| H  | -3.72856035587475 | -0.79370038487857 | -1.92530429276727 |
| H  | -3.80130181249792 | -1.86833600008705 | -0.51533956285743 |
| C  | -0.02448965657091 | 0.99434865565697  | 0.06647544875376  |
| H  | -3.72750374820430 | 1.79189904431858  | 0.74310810672937  |
| H  | -4.88290258982795 | 0.48249744753992  | 0.51614917526648  |
| H  | -4.34121195362560 | 1.40100727648723  | -0.89111615310935 |

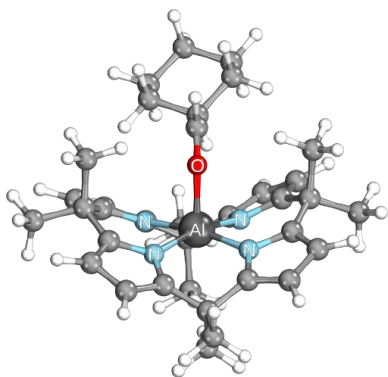

### [1]-cyclohexanecarboxaldehyde sigma adduct isomer B

|    |                   |                    |                   |
|----|-------------------|--------------------|-------------------|
| N  | -0.13220252731327 | -2.32569120776182  | 0.49436037293196  |
| C  | -0.58103857844963 | -3.39669099029257  | 1.23199182476694  |
| C  | 0.27630308626560  | -2.81539492959807  | -0.71740162547482 |
| C  | -0.49159708786713 | -4.54200112267720  | 0.46968868560545  |
| H  | -0.76086908225991 | -5.54145824271901  | 0.77373037041980  |
| C  | 0.05924055939670  | -4.17132236586352  | -0.77533654334609 |
| H  | 0.29638190630829  | -4.82955671036714  | -1.59679195067023 |
| N  | 0.00941792500835  | -1.00759302037004  | 2.84312095092041  |
| C  | 0.567113366040395 | -0.25445833062929  | 3.84401923641631  |
| C  | -0.38965390166023 | -2.19430648769178  | 3.41481672905845  |
| C  | 0.50035325446041  | -0.93107625354778  | 5.03576578908981  |
| C  | -0.11556671357983 | -2.16968349220785  | 4.76173339130921  |
| H  | -0.31843926640437 | -2.95212886957842  | 5.47623453584989  |
| N  | -0.06465865840847 | 1.42448095116466   | 1.48218998557858  |
| C  | -0.56607515012758 | 2.50276243067852   | 0.79312115494833  |
| C  | 0.46121642962665  | 1.90806527351793   | 2.65058656510316  |
| C  | -0.39702503684764 | 3.64356359001010   | 1.54344994568236  |
| H  | -0.69530454114101 | 4.64448463071191   | 1.27069417621510  |
| C  | 0.26556869814144  | 3.26454064962062   | 2.72876221001075  |
| H  | 0.58193796102572  | 3.91797975751844   | 3.52660039468203  |
| N  | -0.14241146050835 | 0.12203219753942   | -0.86277433683701 |
| C  | 0.1850388976828   | -0.67847416599788  | -1.92201470514500 |
| C  | -0.78649371960912 | 1.22468870536077   | -1.37156626053563 |
| C  | -0.27487772085581 | -0.12300353256903  | -3.09374484399187 |
| H  | -0.15105030671547 | -0.51916372178150  | -4.08991201720292 |
| C  | -0.90362805982061 | 1.08956710175400   | -2.73949336805597 |
| H  | -1.34343693418079 | 1.80403754364448   | -3.41972881592875 |
| H  | 0.16466435488030  | -2.96737990225362  | -3.45816262474406 |
| C  | 1.13083356504671  | -2.676056448481389 | -3.04348687387223 |
| C  | 2.38376237104958  | -1.58897951439080  | -1.20250152610360 |
| C  | 0.97267660348395  | -1.93714574511911  | -1.71715924413569 |
| H  | 2.96800704110345  | -2.49796485243772  | -1.04638590545594 |
| H  | 1.72883522713245  | -3.57856975596474  | -2.91204460164545 |
| H  | 2.35299353850096  | -1.05506613714531  | -0.25231716571199 |
| H  | -2.96116902399471 | -2.24363331638971  | 2.48175497083181  |
| C  | -2.58753996538635 | -3.21732436212858  | 2.78189485459914  |
| C  | -0.66940487290162 | -4.64782789110365  | 3.34995211778935  |
| C  | -1.05023892380207 | -3.32297031113426  | 2.66671816819819  |
| H  | 0.40559610107931  | -4.81503459798897  | 3.31021114573330  |
| H  | -3.07788480759538 | -3.98338357542250  | 2.17586743103186  |
| H  | -1.16865252264844 | -5.49154457926635  | 2.87159846948711  |
| C  | 3.16873207557047  | 1.65015914497072   | 2.65918865264140  |
| C  | 2.62772196869644  | 0.72633923446853   | 2.87506142049252  |
| C  | 1.57410367491428  | 1.77017760714116   | 4.86061994039869  |
| C  | 1.27615351601078  | 1.03457356776208   | 3.55573320698996  |
| H  | 2.19887995318768  | 1.15945420027170   | 5.51346525018525  |
| H  | 2.49581345862658  | 0.19814535429441   | 1.92951609279033  |
| H  | 0.65674963148363  | 2.01815217141646   | 5.39552836473011  |
| C  | -1.18865530730487 | 2.44880203007059   | -0.57873730682580 |
| C  | -2.72079324940048 | 2.59235891389035   | -0.47449813120007 |
| C  | -0.69274176763949 | 3.67750573612638   | -1.36992609687802 |
| H  | -3.18745900140136 | 2.54596848756274   | -1.46161145682659 |
| H  | -1.14453130452653 | 3.71393278298389   | -2.36210374607998 |
| H  | -3.16756742894035 | 1.82611616587470   | -0.15465164311876 |
| H  | 0.38895957009417  | 3.64631941417843   | -1.48868667126905 |
| H  | -2.97498349744318 | 3.55293958126119   | -0.02268280511931 |
| H  | -0.9546358217007  | 4.60578271248036   | -0.86130016961091 |
| H  | 2.90690533218572  | -0.95079025066316  | -1.91777529719174 |
| H  | 1.63964966669380  | -2.04639297104783  | -3.77470689783251 |
| H  | -0.98091585797919 | -4.64915728750119  | 4.39447362187416  |
| H  | -2.88904714701636 | -3.35661775322401  | 3.82207202941320  |
| H  | 2.11661755028590  | 2.69592463208284   | 4.66454850156858  |
| H  | 3.24515445910225  | 0.09508363973370   | 3.51759903673645  |
| H  | 0.86932041849870  | -0.59340974201315  | 5.99148772605807  |
| Al | -0.29745036682599 | -0.44194342465268  | 1.01071770868106  |
| O  | -2.27016537232453 | -0.44667902704954  | 1.02175040960291  |
| C  | -3.16651776534059 | -0.79013858736408  | 0.27031207217231  |
| C  | -4.19376503278775 | -0.68995619960293  | 0.66015476556431  |
| C  | -3.06978075576010 | -1.36095199530028  | -1.09080105815813 |
| C  | -3.34119560751886 | -3.48861878731676  | -2.38630817844539 |
| C  | -4.03305578203316 | -1.29781867631349  | -3.40633924621801 |
| C  | -4.29890159096756 | -2.79779888043111  | -3.35007198448676 |
| C  | -4.07317894532990 | -0.66694446271830  | -2.01992547295358 |
| C  | -3.38215473243495 | -2.86847982701167  | -0.99605077210563 |
| H  | -2.31552308753335 | -3.411886479263480 | -2.76032802153228 |
| H  | -3.04624465753990 | -1.11170906486167  | -3.84001100088687 |
| H  | -5.33152513988966 | -2.97290497996470  | -3.02570393695418 |
| H  | -5.08653316490349 | -0.74942911936622  | -1.60501027546681 |
| H  | -4.37408300662344 | -3.01901918808643  | -0.55048178860070 |
| H  | -2.06224134198453 | -1.24364264251433  | -1.48983826283442 |
| H  | -3.57081419512016 | -4.55415920945621  | -2.31260696088826 |
| H  | -4.76134018544011 | -0.80446758682448  | -0.05523242238431 |
| H  | -4.21149994609595 | -3.23378096556414  | -4.34878476393261 |
| H  | -3.83420705382601 | 0.39444920416834   | -2.09270077351804 |
| H  | -2.65229621867182 | -3.36410376173251  | -0.35499361232105 |

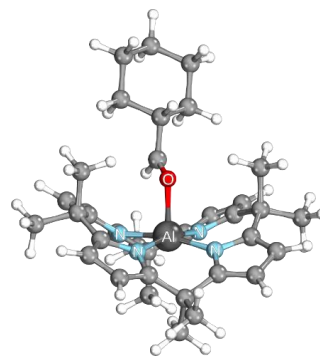

### [1]-cyclohexanecarboxaldehyde sigma adduct isomer A

|    |                   |                    |                   |
|----|-------------------|--------------------|-------------------|
| N  | -0.43734374459476 | -1.94571507797688  | 0.61258442125989  |
| C  | -1.24870756594720 | -2.80296845952259  | 1.31696665705878  |
| C  | -0.50283402425554 | -2.31677078796355  | -0.70220140106882 |
| C  | -1.85731500032318 | -3.67633937900593  | 0.43819290627645  |
| H  | -2.52839757369131 | -4.48199908651273  | 0.69694346485249  |
| C  | -1.37237673378620 | -3.37256070475956  | -0.85324415037648 |
| H  | -1.61320255068386 | -3.88527037571476  | -1.77171651865562 |
| N  | 0.28285307006557  | -0.90860877248786  | 2.98433638495962  |
| C  | 1.17048722863318  | -0.44174511116147  | 3.91841763276786  |
| C  | -0.30734404045321 | -2.02893257147993  | 3.51660038603144  |
| C  | 1.12688021489880  | -1.23174563799141  | 5.04035424054457  |
| C  | 0.17859514330545  | -2.24434936484631  | 4.78482931271769  |
| H  | -0.10465593846962 | -3.03839669412309  | 5.45843239379241  |
| N  | 0.63654874023533  | 1.57855503039302   | 1.82329781450790  |
| C  | 0.37060961989457  | 2.80799519234489   | 1.26964343641301  |
| C  | 1.48200724973466  | 1.79031694552305   | 2.88180526705091  |
| C  | 1.01424350339963  | 3.78410734701424   | 1.99306946727534  |
| H  | 0.98810048618614  | 4.84691698957313   | 1.80933260198738  |
| C  | 1.72842810035437  | 3.13321500335548   | 3.0209770173595   |
| H  | 2.36540351941249  | 3.59976774275002   | 3.75605839896265  |
| C  | -0.14535205160764 | -0.14099574383456  | -1.72595513471886 |
| C  | -0.51642120511203 | 1.86353192980299   | -0.87980568839710 |
| H  | -1.00327327176181 | -2.13443873677300  | -3.40026736863797 |
| C  | 0.04861482048732  | -2.18767974463976  | -3.11742129986820 |
| C  | 1.79559066031934  | -1.6828217544054   | -1.43360521190110 |
| C  | 0.29049371769868  | -1.57796023987017  | -1.73974553721125 |
| H  | 2.11534638766787  | -2.72695838816667  | -1.43263957352424 |
| H  | 0.35208993817929  | -3.23559460082165  | -3.13073400054602 |
| H  | 2.05029124161013  | -1.26473080786764  | -0.45976057705700 |
| H  | -2.93422877653632 | -1.33840742424867  | 3.14673928966654  |
| C  | -2.76321218556799 | -2.40074735923950  | 3.30583623875493  |
| C  | -1.20045089323669 | -4.31596493029431  | 3.25266656960298  |
| C  | -1.36588494267036 | -2.84531413650932  | 2.82499990577987  |
| C  | -0.22838639269609 | -4.69991408645093  | 2.94736128361109  |
| H  | -3.54864364196058 | -2.95248214048672  | 2.79294944218264  |
| H  | -1.97159018464579 | -4.94208927525211  | 2.80227257065714  |
| H  | 3.99286581838639  | 0.84862776699122   | 2.44923365320106  |
| C  | 3.26111651832874  | 0.07630991827227   | 2.69532605068061  |
| C  | 2.80476430921480  | 1.15503707029592   | 4.8804843750895   |
| C  | 2.14594770744924  | 0.65149673114050   | 3.5972193875401   |
| H  | 3.24852562727075  | 0.34361427192493   | 5.39094175169556  |
| H  | 2.86467461994469  | -0.30744280597823  | 1.75363628801074  |
| H  | 0.20675681955215  | 1.57498382328258   | 5.56459285834945  |
| C  | -0.53382208658657 | 3.02890833035898   | 0.08610709803307  |
| C  | -1.96162422871609 | 3.35991282468827   | 0.57243346125097  |
| C  | -0.03958554280270 | 4.27097523830970   | -0.67641107565272 |
| H  | -2.63198965883606 | 3.51889645338573   | -0.27672491770419 |
| H  | -0.68992032319067 | 4.49272527979602   | -1.52326739676757 |
| H  | -2.37752629084749 | 2.57669979315801   | 1.20092961175394  |
| H  | 0.97167595209234  | 4.12148723960096   | -1.05111157902432 |
| H  | -1.94572920079275 | 4.27405397084321   | 1.16927966676973  |
| H  | -0.04322551470592 | 5.15226339666363   | -0.03412813952595 |
| H  | 2.37446226803679  | -1.13865045873374  | -2.18238923975792 |
| H  | 0.62898852004062  | -1.66088334591199  | -3.87613081321233 |
| H  | -1.28919381237881 | -4.42437384173496  | 4.33429892354021  |
| H  | -2.85985202601838 | -2.58047674231447  | 4.37820017389121  |
| H  | 3.54531442439406  | 1.92421228684128   | 4.65803281803717  |
| H  | 3.77032616461024  | -0.75071905254046  | 3.19468886941209  |
| H  | 1.71996409159849  | -1.11749675353060  | 5.93400686656932  |
| Al | -0.09761416166360 | -0.11604084190329  | 1.2636401603376   |
| C  | -2.79322042115778 | -0.24081397882815  | 0.50633578055719  |
| C  | -2.06280509919388 | 0.20780881973500   | 1.38081685841053  |
| C  | -0.85180442125757 | 1.9179084304366    | -2.21591090201220 |
| H  | -1.18927976705155 | 2.78749896541524   | -2.75930752031331 |
| C  | -0.60929489050615 | 0.69399168606152   | -2.75934311957986 |
| H  | -0.73265650176373 | 0.33791010491958   | -3.6887153100538  |
| N  | -0.10451609757830 | 0.58842037964769   | -0.56950604922505 |
| H  | -2.39040713769640 | -0.88939402785813  | -0.28454995740311 |
| C  | -4.23817974721353 | 0.07781220358109   | 0.39885424726080  |
| C  | -5.92945512730148 | 1.06635801677101   | -1.19291142172975 |
| C  | -6.53104732397467 | -0.95209352230461  | 0.17552162906158  |
| C  | -6.74388735626273 | -0.22099219747708  | -1.1449020970289  |
| C  | -5.05437608797247 | -1.223027263178363 | 0.43822844954309  |
| C  | -4.44990805822741 | 0.80302742370424   | -0.94289165622594 |
| H  | -6.30713858328669 | 1.76552745326499   | -0.43905245380237 |
| H  | -6.94069383041416 | -0.35033290913107  | 0.99408061346233  |
| H  | -6.43941407384708 | -0.87164096557272  | -1.97159110868751 |
| H  | -4.66046202106626 | -1.91752379100134  | -0.31121560085159 |

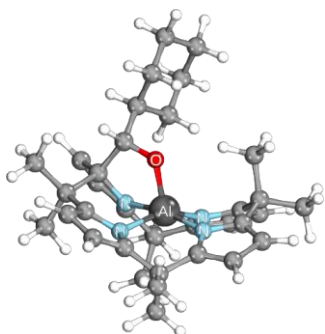

**[1]-cyclohexanecarboxaldehyde 1,2 adduct isomer B**

|    |                   |                   |                   |
|----|-------------------|-------------------|-------------------|
| Al | 3.46787891571615  | 8.90754006210306  | 2.74563765363644  |
| O  | 3.35116693979091  | 8.36804980809328  | 4.44611482897480  |
| N  | 2.98072061108705  | 10.74300324605711 | 2.55441217439114  |
| N  | 5.39433030188077  | 9.25892516481875  | 2.71061138371551  |
| N  | 1.83678942618398  | 8.40270249044346  | 1.75866979541590  |
| N  | 3.96888225660983  | 6.98668311186099  | 2.43165621865061  |
| C  | 5.90696965422768  | 10.52484107861300 | 2.75344322310956  |
| C  | 3.80280159238704  | 11.81786441005776 | 2.35493913281977  |
| C  | 3.88701174881949  | 7.16468003937027  | 4.82406746598084  |
| H  | 4.66446030354907  | 7.31824167804925  | 5.59076738987851  |
| C  | 0.64920262644627  | 9.06101838839169  | 1.92233896523173  |
| C  | 0.25614065539450  | 7.27425991087621  | 0.62727031009251  |
| H  | -0.23434413411009 | 6.54129000186109  | 0.00460150855292  |
| C  | 7.06812547472393  | 10.53897279853118 | 3.49067801799852  |
| H  | 7.69443544040374  | 11.39289912586151 | 3.69639422338029  |
| C  | 3.04995386371131  | 12.96802124903410 | 2.31767868262848  |
| H  | 3.41229174734348  | 13.97237384132713 | 2.15993668661606  |
| C  | 1.69357087697715  | 11.21021998449915 | 2.61282122695650  |
| C  | 8.2173608980013   | 6.26927615379896  | 5.49108991122519  |
| H  | 3.27970488736534  | 5.28915783551049  | 5.69680554900791  |
| C  | 2.68123990645060  | 6.37216235978931  | 0.50541914669532  |
| C  | -0.34644513909914 | 8.39306193879689  | 1.24066500832793  |
| H  | -1.38781628582362 | 8.66852591934183  | 1.18344464409777  |
| C  | 5.25842795207957  | 11.65206346713768 | 1.99933942670032  |
| C  | 3.51215708057062  | 6.03787968068144  | 1.7097799244024   |
| C  | 1.5898599681632   | 7.31402853394470  | 0.96522437470150  |
| C  | 1.56158214693018  | 6.04984340281788  | 4.65299146075973  |
| H  | 1.12801820047372  | 7.01643948782944  | 4.38885886274096  |
| H  | 1.79548275518291  | 5.56122664658018  | 3.70817325266614  |
| C  | 0.511544461130318 | 10.29091086999893 | 2.79346735624228  |
| C  | 6.24449106223385  | 8.45696205477756  | 3.43960723423225  |
| C  | 4.50864424581452  | 5.00768399388801  | 3.44031710712503  |
| H  | 4.90406362628918  | 4.27637003463649  | 4.12998762163699  |
| C  | -0.7684943790688  | 11.03636702280076 | 2.40138918046593  |
| H  | -0.74348900919692 | 11.34763258686169 | 1.35728410337955  |
| H  | -1.64418113951986 | 10.40635992054515 | 2.55503282476749  |
| H  | -0.89663554485450 | 11.92329918665390 | 3.02279422183890  |
| C  | 3.85421499314538  | 4.74497373446690  | 2.29901300278692  |
| H  | 3.59120671253863  | 3.77759388189686  | 1.89886974691216  |
| C  | 1.70095713716528  | 12.57938606014085 | 2.48511996228420  |
| H  | 0.84308453474184  | 13.23385406748569 | 2.49576384669620  |
| C  | 4.64258272505575  | 6.48603642535007  | 3.58360230987606  |
| C  | 3.58665732375359  | 7.0509592867203   | -0.53959687423473 |
| H  | 4.03593213818351  | 7.96435975729833  | -0.15137721106641 |
| H  | 4.39638823007689  | 6.38942122354448  | -0.85996065727416 |
| H  | 2.99194814554931  | 7.31859261293796  | -1.41340021885286 |
| C  | 7.27969485878308  | 9.21559833819237  | 3.93543632481786  |
| H  | 8.11020808871401  | 8.86889423970942  | 4.53189616983430  |
| C  | 6.00911798805401  | 12.95456780511681 | 2.27186805128921  |
| H  | 5.95790456577320  | 13.22702653213519 | 3.32600931484465  |
| H  | 7.05902680048821  | 12.86187312541956 | 1.98850111783172  |
| H  | 5.58545858056630  | 13.77297930948398 | 1.68902306533435  |
| C  | 2.44114047571672  | 6.88101666455941  | 6.84349192897200  |
| H  | 3.33808256810469  | 6.99600875780277  | 7.46058075907170  |
| H  | 2.05228027779269  | 7.88943574231763  | 6.67639992582273  |
| C  | 6.14419676114942  | 6.95099489783462  | 3.49119958824902  |
| C  | 0.36228105688940  | 9.88864806436968  | 4.2760232953067   |
| H  | -0.49108293096031 | 9.21697620062238  | 4.40385268581247  |
| H  | 1.24825678714518  | 9.38714383812722  | 4.65853283501349  |
| H  | 0.19767932308206  | 10.77930849432116 | 4.88675611418445  |
| C  | 1.40331295168833  | 6.04831335559711  | 7.58746535484723  |
| H  | 1.83337934031091  | 5.0731919737309   | 7.84711526630857  |
| H  | 1.14221839930900  | 6.53095692860592  | 8.53368777437800  |
| C  | 3.5864826564168   | 11.35339326315713 | 0.48763458728506  |
| H  | 6.40116243315526  | 11.22429198190002 | 0.18619371576017  |
| H  | 4.82112984145246  | 10.44069282663141 | 0.22923718774049  |
| H  | 4.92084505568492  | 12.16883912945537 | -0.09153528013094 |
| C  | 2.08654206491294  | 5.10728528088418  | -0.10738290087470 |
| H  | 2.87261728495426  | 4.42002021178366  | -0.42772210829580 |
| H  | 1.43454144231228  | 4.58724418689536  | 0.59536890219470  |
| H  | 1.49452858133140  | 5.35707273421654  | -0.98719019114964 |
| C  | 0.52232446650999  | 5.214373055530321 | 5.39501100979183  |
| H  | -0.36932351215958 | 5.1039735988781   | 4.77249412585291  |
| H  | 0.91163319096072  | 4.2020292775236   | 5.56101495319428  |
| C  | 0.15654876665024  | 5.83418203485324  | 6.73758619637336  |
| H  | -0.56702058324012 | 5.20786718944273  | 7.26804369233085  |
| H  | -0.33203974959907 | 6.79926383779529  | 6.56526791202510  |
| C  | 6.93978070267488  | 6.39870153181638  | 4.67700537265216  |
| H  | 7.99200525090666  | 6.66349509273087  | 4.57565314974193  |
| H  | 6.59692740030287  | 6.79340279442117  | 5.63207470356624  |
| H  | 6.89151668698927  | 5.30867115433630  | 4.71640320626994  |
| C  | 6.78886255017900  | 6.39318951746924  | 2.20806775941870  |
| H  | 6.28117141843391  | 6.74785385834118  | 1.31227872355293  |
| H  | 7.81620231936616  | 6.75333712712151  | 2.15370023423184  |
| H  | 6.81087542500040  | 5.30088269557065  | 2.18630170295425  |

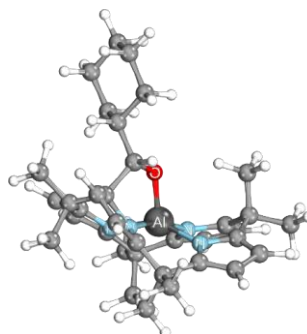

**[1]-cyclohexanecarboxaldehyde 1,2 adduct isomer A**

|    |                   |                   |                   |
|----|-------------------|-------------------|-------------------|
| N  | -0.0555737930004  | -2.29023605927228 | 0.41151480142696  |
| C  | -0.31303169709309 | -3.4693298070224  | 1.05607916336275  |
| C  | 0.37139303599711  | -2.60777119232900 | -0.85137047022573 |
| C  | -0.04692557288092 | -4.52621376510372 | 0.21173606791554  |
| H  | -0.15773203689862 | -5.57559976128845 | 0.43510280745636  |
| C  | 0.39078173288841  | -3.97433136093134 | -1.01059242537651 |
| H  | 0.68951305025924  | -4.52088858773589 | -1.89232121041940 |
| N  | 0.05944160115891  | -1.24151781594487 | 2.9338327681705   |
| C  | 0.69139059545517  | -0.60068590116527 | 3.96438292738529  |
| C  | -0.229389595737   | -2.51497024030302 | 3.35097190310286  |
| C  | 0.77946024939384  | -1.44803674317340 | 5.04341953322788  |
| C  | 0.18928619385173  | -2.67180778616686 | 4.65155905014341  |
| H  | 0.09991750772646  | -3.56121136380551 | 5.25590382275187  |
| N  | 0.15170278898225  | 1.28651096453595  | 1.65909426505658  |
| C  | -0.48392410409439 | 2.37328521623679  | 1.10240698356549  |
| C  | 0.56262847797985  | 1.66269280915359  | 2.90762886392632  |
| C  | -0.46912304095635 | 3.42216886709257  | 1.99272340437559  |
| H  | -0.87592092774957 | 4.41004882747934  | 1.83590070494662  |
| C  | 0.20413244066653  | 2.96828001294260  | 3.14876341567558  |
| H  | 0.39560022901385  | 3.53727854093297  | 4.04497151463604  |
| C  | -0.19581919297071 | -0.45160953165088 | -1.81146493787495 |
| C  | -1.51655459160790 | 1.07327839720570  | -0.82813245254863 |
| H  | -0.05717468301341 | -2.59375416066727 | -3.57123082533862 |
| C  | 0.89386756011254  | -2.16187700616341 | -3.25821420364840 |
| C  | 2.18665611206388  | -0.98814782487770 | -1.47969791216910 |
| C  | 0.80855774137934  | -1.56573472412081 | -1.85578123078423 |
| H  | 2.92808308770917  | -1.78737772204251 | -1.49293978228373 |
| H  | 1.64246812389885  | -2.95282484737282 | -3.28691703476570 |
| H  | 2.18187244845846  | -0.55587701222058 | -0.47968757058678 |
| H  | -2.67598042066951 | -2.31138626690628 | 2.00812961268777  |
| C  | -2.41957199459040 | -3.29329340434338 | 2.39900735255898  |
| C  | -0.67450267895394 | -4.92680654675887 | 3.02767036594323  |
| C  | -0.89429410458115 | -3.52564594652822 | 2.45116018762326  |
| H  | 0.3853517882758   | -5.17330176791983 | 3.08706328145854  |
| H  | -2.89308101108503 | -4.04468233485009 | 1.76207141528904  |
| H  | -1.17149340252074 | -5.67903226091794 | 2.41362859372162  |
| H  | 3.26035789583315  | 1.44294492807611  | 2.95026758868773  |
| C  | 2.73573761325901  | 0.49684373217985  | 3.10483526126059  |
| C  | 1.61480510741577  | 1.38495297274088  | 5.13525979821022  |
| C  | 1.36493230851738  | 0.73414682306698  | 3.77580753912678  |
| H  | 2.24154703073897  | 0.74671699239085  | 5.75879123863926  |
| H  | 6.22215113714430  | 0.01549456545072  | 2.13317231508776  |
| H  | 0.67963976555890  | 1.56483071244334  | 6.66548218873119  |
| C  | -0.93047062473388 | 2.43994076118798  | -0.33811153635530 |
| H  | -1.91628374065949 | 3.59182252674590  | -0.55678321156311 |
| C  | 0.31723606331486  | 2.78138829258183  | -1.18469496787833 |
| H  | -2.24660542667873 | 3.63801370894371  | -1.59635528494304 |
| H  | 0.08941996379871  | 2.87946547316011  | -2.24931305470001 |
| H  | -2.79449656824318 | 3.53601063493743  | 0.07915768756394  |
| H  | 1.10724615255016  | 2.04253698659142  | -1.06406970375791 |
| H  | -1.42305690076806 | 4.50438835253777  | -0.34329572332138 |
| H  | 0.71808338839949  | 3.73353764495423  | -0.83690973037069 |
| H  | 2.50221401730773  | -0.20995804030181 | -2.18028069037714 |
| H  | 1.19162601045333  | -1.40578346236145 | -3.98060439868124 |
| H  | -1.10121931796529 | -4.99778618529887 | 4.02885398568674  |
| H  | -2.84125405909536 | -3.37359556918006 | 3.40364838482677  |
| H  | 2.13479302867108  | 2.33714176442205  | 5.01741357066461  |
| H  | 3.35544088674252  | -0.15449321628181 | 3.72435908226924  |
| H  | 1.23758643169229  | -1.23421170196173 | 5.99690582968629  |
| Al | -0.43090125568369 | -0.53436529104060 | 1.23209898663675  |
| C  | -2.68070558652172 | 0.33054053114365  | -0.01235505318215 |
| O  | -2.18953715564986 | -0.20324020312229 | 1.14636451149166  |
| C  | -1.80755649114434 | 1.04096257723195  | -2.29068897048876 |
| H  | -2.55339205750316 | 1.6483833583520   | -2.78300644059700 |
| C  | -1.01877656549738 | 0.12487790582970  | -2.87219652734908 |
| H  | -1.00334488919064 | -0.16717006703233 | -3.91125370573735 |
| N  | -0.46335401930159 | 0.10144095841584  | -0.69118024740592 |
| H  | -2.95273875987596 | -0.47584469595375 | -0.72150171142815 |
| C  | -3.97194837270260 | 1.13883192048012  | 0.22346437857724  |
| H  | -6.50046661961852 | 0.99873020535663  | 0.25938156621332  |
| C  | -5.30455473141088 | 2.62128909356519  | 1.76318439082764  |
| C  | -6.53559264989052 | 1.73726247951020  | 1.59315100016698  |
| C  | -4.02066833821084 | 1.81588432941113  | 1.59355742230217  |
| C  | -5.19609550267148 | 0.02790069289617  | 0.07290149595307  |
| H  | -6.60562617627189 | 1.72582639858922  | -0.55483936775163 |
| H  | -5.33603135229920 | 3.4369041692609   | 1.02599470640073  |
| H  | -6.56223016085607 | 1.00568810164351  | 2.40787593043531  |
| H  | -3.97065329191826 | 1.04309854126144  | 2.363             |

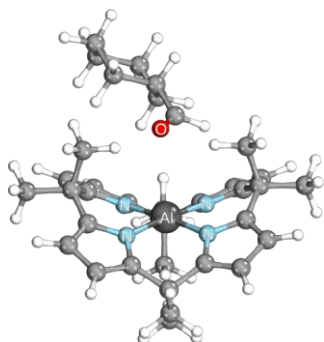

### [1]-cyclohexanecarboxaldehyde TS 1 adduct B/A

|    |                   |                   |                   |
|----|-------------------|-------------------|-------------------|
| C  | 2.48307553906019  | 2.47307473920483  | 0.76314497062122  |
| C  | -2.77367362125904 | 3.14221943547310  | 2.19850981478591  |
| C  | -2.43905187245596 | -0.20751869621915 | -2.16206829020444 |
| C  | -2.34391717722990 | 3.77965008482463  | 0.85817022011454  |
| H  | -2.32350978403927 | 2.15845452564120  | 2.34760549461887  |
| C  | -3.99849909722846 | 1.823544404097583 | -1.81654245134641 |
| H  | -4.76834959903633 | 1.57784594794744  | -2.53105767539942 |
| H  | -3.85685450063691 | 3.00911940593162  | 2.23033082606573  |
| H  | -2.46582803893871 | 3.76819159693768  | 3.03843994908688  |
| C  | -1.44745995404847 | 0.12558863242027  | -3.29556821444285 |
| H  | -1.96135548504677 | 0.69819774096606  | -4.07063914020051 |
| C  | 3.10671235077977  | 0.27215687093906  | 1.98353897928760  |
| H  | 4.13792605372159  | 0.48860706956341  | 2.21497321880796  |
| C  | 2.40062120993884  | -0.90649045464028 | 2.32244332064072  |
| H  | 2.78510433471475  | -1.75448196725818 | 2.86795861002935  |
| H  | -1.04089777001323 | -0.78459974852684 | -3.74032858566544 |
| H  | -0.61104475266748 | 0.72505680677151  | -2.94835693432921 |
| C  | 0.35497076569629  | -3.00542776938786 | 2.54762965174261  |
| H  | -0.50979670049699 | -3.65787364533304 | 2.67520762071802  |
| H  | 0.83273044683190  | -2.89788181555208 | 3.52238396750315  |
| H  | 1.05951977189401  | -3.49997365160807 | 1.87908770726291  |
| C  | -3.64124118932898 | -0.90197236202941 | -2.80986367068989 |
| H  | -4.39698393629074 | -1.1622403054237  | -2.06966348419230 |
| C  | -3.02820115131181 | 5.14187693307924  | 0.75479806740050  |
| H  | -2.74017713863745 | 5.78315193534705  | 1.58858916246392  |
| H  | -4.11269041620487 | 5.03299323263791  | 0.79146323743510  |
| H  | -2.76445145470106 | 5.64605319725997  | -0.17452606795840 |
| H  | -3.32989034274285 | -1.81406292691445 | -3.32078875038465 |
| H  | -4.09937466077662 | -0.25782598737473 | -3.56114293841232 |
| C  | 3.66579994013959  | 3.09885943593999  | 1.50738039499322  |
| H  | 3.88681572800703  | 4.09130958666456  | 1.11309278607288  |
| H  | 4.56602852881558  | 2.49665522679648  | 1.37746868880991  |
| H  | 3.46185356903857  | 3.18807324148423  | 2.57377618984326  |
| C  | 2.86813710671922  | 2.41031861273279  | -0.72875461290873 |
| H  | 2.05482725146268  | 2.03943385173283  | -1.34724612356756 |
| H  | 3.72990977772645  | 1.75558041678122  | -0.88060877226395 |
| H  | 3.12347290045873  | 3.40980737191931  | -1.08647202519483 |
| Al | -0.5258668041237  | 1.09697314587155  | 0.25199883138792  |
| O  | 1.26473524895313  | -0.24646028523911 | -1.77315412705389 |
| N  | 1.00373782832932  | 0.47145186199267  | 1.23604375498425  |
| N  | -2.13279626087086 | 1.72900579621081  | -0.57437541644287 |
| N  | -0.00294338178569 | 2.89062250336520  | 0.67772819044436  |
| N  | -1.12475733886956 | -0.69742599028970 | -0.04851557047831 |
| C  | -0.85331749054545 | 3.95550888105972  | 0.85712249927089  |
| C  | -2.8986735390762  | 1.07362842324380  | -1.51779836727741 |
| C  | -0.7705827196421  | -1.7974357085844  | 0.8863506586864   |
| C  | 1.2710490052209   | 3.34704125958936  | 0.9234190809060   |
| C  | -0.07490261635947 | -1.6432018836247  | 2.00937879162913  |
| C  | -2.79127611799494 | 2.89641930609590  | -0.26956147942202 |
| C  | 1.12048022928543  | -0.74756605819789 | 1.84979991737590  |
| C  | -1.04819618852660 | -1.02980185436244 | 3.03797421666918  |
| H  | -1.41155867071509 | -0.04614406131156 | 2.73504623413744  |
| H  | -0.55623186272777 | -0.90636813087466 | 4.00473742290030  |
| H  | -1.92397719840105 | -1.66918166825397 | 3.16405331585351  |
| C  | -3.93840521854639 | 2.98691929882241  | -1.01450219146884 |
| H  | -4.66672555253387 | 3.78205394935914  | -0.98108388919920 |
| C  | 2.22172488301947  | 1.09932647673017  | 1.32935800088991  |
| C  | -1.84248354071987 | -1.13759106091670 | -1.13373513207293 |
| C  | -0.13082751539374 | 5.07090181652995  | 1.19390643246716  |
| H  | -0.52431947424789 | 6.05141178509346  | 1.41164543005939  |
| C  | -1.92226203545450 | -2.50983178934976 | -1.09390708670962 |
| H  | -2.43146717216968 | -3.14566340248287 | -1.80134128409509 |
| C  | 1.22862238564122  | 4.68293866258543  | 1.23025119682456  |
| H  | 2.07015621109511  | 5.31869268454260  | 1.45669100279630  |
| C  | 2.08197944812170  | -1.01024068762549 | -1.32361215389470 |
| H  | 2.67400197620462  | -0.74633625190958 | -0.42948523824861 |
| C  | -1.24175384086950 | -2.93238062376145 | 0.07358442284347  |
| H  | -1.14587581100470 | -3.94604947016113 | 0.43240120981696  |
| C  | 2.39126887473821  | -2.35307060651451 | -1.92550167619528 |
| C  | 2.76768959812995  | -4.78832132746613 | -1.38119796231614 |
| C  | 1.78601806891732  | -4.12001420984388 | -3.60836036297113 |
| C  | 1.80753296122653  | 5.17842742080501  | -2.51033466581662 |
| C  | 1.44173196365275  | -2.74270847611102 | -3.05074968036589 |
| C  | 2.41918440930417  | -3.41775919828343 | -0.82389353842845 |
| C  | 3.79357995510140  | -4.77801931048964 | -1.77841528168617 |
| H  | 2.76761224521909  | -4.08680207766518 | -4.09650840977759 |
| H  | 0.79971635431488  | -5.28300683592641 | -2.09526396353679 |
| H  | 0.41967780109551  | -2.74460530029993 | -2.65844730840787 |
| H  | 1.42939814450503  | -3.4530998842157  | -0.36007988714331 |
| H  | 3.41700748097480  | -2.26702167366132 | -2.32229741086172 |
| H  | 2.74579722878322  | -5.53643113018204 | -0.59443768348098 |
| H  | 1.06718883241019  | -4.39628930713242 | -4.38399646208137 |
| H  | 2.07992274715212  | -6.15335981545042 | -2.92425976387514 |
| H  | 1.46549381595952  | -1.99363477490322 | -3.84486416408006 |
| H  | 3.12150080819598  | -3.12919641516867 | -0.03737559378524 |

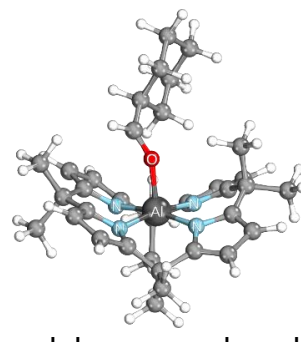

### [1]-cyclohexanecarboxaldehyde TS 2 isomer B

|    |                   |                   |                   |
|----|-------------------|-------------------|-------------------|
| Al | 3.65723494086124  | 8.79115736680791  | 2.44128368693862  |
| O  | 3.373644498187594 | 8.29949439893448  | 4.31756101328460  |
| N  | 3.11662377458688  | 10.66050109634566 | 2.46137894870185  |
| N  | 5.53500322269291  | 9.27432230499772  | 2.66792547048704  |
| N  | 1.84311720488927  | 8.34032970933268  | 1.85016272457974  |
| N  | 4.27912799193475  | 6.95587851120075  | 2.06037989346785  |
| C  | 6.00844499202805  | 10.55646286898758 | 2.69841255409464  |
| C  | 3.9156918879209   | 11.75327233058308 | 2.23449413086997  |
| C  | 3.54528931536877  | 7.51834872976039  | 5.22779131088136  |
| H  | 4.45640489640134  | 7.61475210576478  | 5.83822994733786  |
| C  | 0.69761932478917  | 8.96603802964813  | 2.28598608191499  |
| C  | 0.07830635708450  | 7.09840138353726  | 1.21146835420378  |
| H  | -0.51420606642392 | 6.31849158479153  | 0.75882492283093  |
| C  | 7.13461223782248  | 10.62900570992731 | 3.48052334178562  |
| H  | 7.72307826490103  | 11.50989552510649 | 3.68571040790241  |
| C  | 3.17544290792271  | 12.90497596162513 | 2.31475203264072  |
| H  | 5.33441915215092  | 13.91268373937943 | 2.17495449141501  |
| C  | 1.84556190122165  | 11.14227029391424 | 2.68076862011752  |
| C  | 2.55936120735734  | 6.48690451641343  | 5.64824314900174  |
| H  | 3.15154627782718  | 5.59520628936849  | 5.89530775671121  |
| C  | 2.44153482372330  | 6.30723473558576  | 0.52188760105190  |
| C  | -0.40045369706300 | 8.2194430945037   | 1.52158951546479  |
| H  | -1.43479436592006 | 8.45947021704208  | 2.11280574924394  |
| C  | 5.36182893482624  | 11.61659730129655 | 1.86177238683739  |
| C  | 3.50881273482008  | 5.96665097701118  | 1.51556051786210  |
| C  | 1.44599906908120  | 7.21194648674663  | 1.18377821885661  |
| C  | 1.52703943626153  | 6.14406760173718  | 4.58229626299463  |
| H  | 1.00542566077544  | 7.04552002762415  | 4.24977870299556  |
| H  | 2.03033647122190  | 7.39251322476553  | 3.70309980390307  |
| C  | 0.66829886737522  | 10.27566396440899 | 3.03357396336014  |
| C  | 6.40546307719359  | 8.51028731141592  | 3.41133616921817  |
| C  | 4.96235533229992  | 4.98240213573018  | 2.89270936094213  |
| H  | 5.55163474857593  | 4.23481561518850  | 3.40335023987003  |
| C  | -0.62304094983761 | 11.01703309402319 | 2.65640980742755  |
| H  | -0.66533610257583 | 11.21438603589562 | 1.58636065867399  |
| H  | -1.50133455864241 | 10.43343824973218 | 2.93385008539419  |
| H  | -0.69505498164678 | 11.96672462506929 | 3.18750092846859  |
| C  | 3.88740021101086  | 4.73999692689394  | 2.00622724895462  |
| H  | 3.45830046654166  | 3.78231849866430  | 1.75547000349890  |
| C  | 1.85152768871584  | 12.51406111859147 | 2.60398753855790  |
| H  | 1.00715728308966  | 13.17137985809070 | 2.7372521218803   |
| C  | 5.19992126320286  | 6.34073229744557  | 2.87538523843663  |
| C  | 3.06780358681919  | 7.00805619392113  | -0.69892773897918 |
| H  | 3.57743944979523  | 7.93246288888949  | -0.42650741563757 |
| H  | 8.80351104137506  | 6.360293314121006 | -1.18066249097530 |
| H  | 2.29457606318169  | 7.26400141118656  | -1.42587957952990 |
| C  | 7.38290817094924  | 9.31844046119361  | 3.94589319755638  |
| H  | 8.22416106568557  | 8.99976640655130  | 4.54389678005059  |
| C  | 0.88344683081948  | 12.94822386502553 | 2.05670541173529  |
| H  | 0.61493976864706  | 13.28925726695044 | 3.08976767498345  |
| H  | 7.13825744795516  | 12.85258493868214 | 1.79402545574804  |
| H  | 5.65365109653470  | 13.71877160556174 | 1.41557337936255  |
| C  | 1.89913376732260  | 6.98322019678718  | 6.95227623783712  |
| H  | 6.25400588783799  | 7.17829990989320  | 7.71979643011839  |
| H  | 1.39236064975329  | 7.93335877043218  | 6.75677631251021  |
| C  | 6.47064096150192  | 7.00815039266926  | 3.33127634593656  |
| C  | 0.60766956468618  | 10.05847560964762 | 4.56144064454423  |
| H  | -0.22593532484141 | 9.40120787949095  | 4.8234690375925   |
| H  | 1.52169796426685  | 9.61798273804378  | 4.94703987710710  |
| H  | 0.47088326109826  | 11.01513923530753 | 5.07005777599405  |
| C  | 0.88246845568908  | 5.96496584137152  | 7.45807658650216  |
| H  | 1.40487932569317  | 5.04799391966242  | 7.75259213347624  |
| H  | 0.39919939395872  | 6.35054898330481  | 8.35947839140410  |
| C  | 5.47960449777468  | 11.23268440299635 | 0.37194456839709  |
| H  | 6.52694263795261  | 11.11854723588713 | 0.08331516675803  |
| H  | 4.97701287684602  | 10.28973477189538 | 0.15328468933050  |
| H  | 5.01289833866116  | 12.00061928165715 | -0.2549330350676  |
| C  | 1.76587723219299  | 5.03514426050563  | 0.03068293633782  |
| H  | 2.48249107085877  | 4.36578414967075  | -0.4336887204162  |
| H  | 1.27257808373747  | 4.50022804477053  | 0.84849822723893  |
| O  | 0.9607184354931   | 5.27121008771445  | -0.71484930228928 |
| C  | 0.51137589435235  | 5.14090819131862  | 5.11268742951340  |
| H  | -0.23636926777341 | 4.95450733625935  | 4.33966185145978  |
| H  | 1.00333828239814  | 4.18106704392931  | 5.30930170396468  |
| C  | -0.1554928852707  | 5.63815912694235  | 6.38984775299717  |
| H  | -0.86359505714592 | 4.89710321926787  | 6.77021894752404  |
| H  | -0.73658398039009 | 6.53865248728940  | 6.16421370723755  |
| C  | 6.95628778362298  | 6.41226603323772  | 4.66505808951924  |
| H  | 7.2481660464118   | 6.82638620004042  | 4.93785836634611  |
| H  | 6.26563595650307  | 6.61760736994547  | 5.75791079642432  |
| H  | 7.07881951960795  | 5.33766505745627  | 4.58307371960795  |
| H  | 6.584943242166    | 5.7797506574353   | 2.25445191292743  |
| H  | 7.285756622170    | 7.08033670446220  | 2.19010852587278  |
| H  | 8.49914510619076  | 7.11875740515822  | 2.51548781091686  |
| H  | 7.65616081629702  | 5.59555530251385  | 2.24533682038063  |

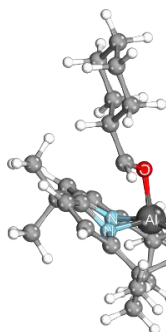

### [1]-cyclohexanecarboxaldehyde TS 2 isomer A

|    |                   |                   |                   |
|----|-------------------|-------------------|-------------------|
| N  | -0.19774256876048 | -2.19507237370220 | 0.44363132055161  |
| C  | -0.57522658042671 | -3.32506906467627 | 1.12768215299449  |
| C  | 0.09468649991227  | -2.58758493263042 | -0.83720249461407 |
| C  | -0.52696559208674 | -4.41207873797292 | 0.28486339980313  |
| H  | -0.7676656777321  | -5.43310518494485 | 0.53531461685604  |
| C  | -0.09733033953108 | -3.94032090051389 | -0.97337488471170 |
| H  | 0.06003724937372  | -4.5295029532953  | -1.86378615967917 |
| N  | 0.2289965911983   | -1.14599756536478 | 2.93317160321764  |
| C  | 0.95915163836540  | -0.56393774274125 | 3.93628427577204  |
| C  | -0.17659552766630 | -2.37659702088870 | 3.38930268959236  |
| C  | 1.00683416346180  | -1.40229464577081 | 5.02216155694906  |
| C  | 0.27792034379079  | -2.56116894977033 | 4.67290766665356  |
| H  | 0.11667427030701  | -3.42678175749235 | 5.29623412023655  |
| N  | 0.33576393563004  | 1.39915753449604  | 1.74596024862819  |
| C  | -0.31325293451749 | 2.51902719957309  | 1.27658580197582  |
| C  | 0.82975850453318  | 1.71473002642324  | 2.98191648437800  |
| C  | -0.24747737457183 | 3.51697294590932  | 2.22069330388054  |
| H  | -0.64243881570287 | 4.51797509310144  | 2.12981738925581  |
| C  | 0.49161140655485  | 3.00423393950938  | 3.31109239454616  |
| H  | 0.74521429373275  | 3.52713498530974  | 4.21999320158291  |
| C  | -0.20348993674257 | -0.37256744110057 | -1.79834279905520 |
| C  | -1.11519187251380 | 1.39675446963365  | -0.85289204471001 |
| H  | -0.48771398158142 | -2.53654659059035 | -3.51200161611624 |
| C  | 0.53127502403583  | -2.23703691658825 | -3.26577655039274 |
| C  | 0.20896663120770  | -1.27844484973836 | -1.58450717332097 |
| C  | 0.61573748396620  | -1.62547810461140 | -1.86973428846373 |
| H  | 2.69547273551352  | -2.18463211358083 | -1.62627468677019 |
| H  | 1.16459024332164  | -3.12164222749311 | -3.33373194936407 |
| C  | 2.2203312618402   | -0.84059527128971 | -0.58539004814632 |
| H  | -2.71482713042356 | -1.93167803055168 | 2.33355169316974  |
| C  | -2.51566055582827 | -2.94198665110022 | 2.67805428307102  |
| C  | -0.88518060560414 | -4.73207733449558 | 3.13854844608080  |
| C  | -1.02146273980896 | -3.31576607155508 | 2.56931999748010  |
| H  | 0.14516787330886  | -5.08306549752594 | 3.09228744228889  |
| H  | -3.12149840576952 | -3.62958379379302 | 2.08267132945990  |
| H  | -1.51484265976947 | -5.43230134865677 | 2.58804002938120  |
| H  | 3.524110855214494 | 1.40959667505080  | 2.76866915646697  |
| C  | 2.97766456833001  | 0.47792092220674  | 2.93306487362974  |
| C  | 2.08266463045976  | 1.32704861712896  | 5.08536119785992  |
| C  | 1.68407906125143  | 0.73716614181663  | 3.7341523297609   |
| H  | 2.74471412602496  | 0.64726530979402  | 5.62299066252986  |
| H  | 2.76642304613141  | 0.04410928585936  | 1.95504026001574  |
| H  | 1.20848639330607  | 1.51379841820585  | 5.70911069186578  |
| C  | -0.76275684433551 | 2.69657723362108  | -0.15189871152849 |
| H  | -1.90670780475609 | 3.70753175259274  | -0.24115149926466 |
| C  | 0.43868393075290  | 3.28560861586004  | -0.93187346307559 |
| H  | -2.23959344492470 | 3.84158483559474  | -1.27233890680198 |
| H  | 0.18061101518416  | 3.47291566468168  | -1.97767079967320 |
| H  | -2.76349710323431 | 3.41644942815699  | 0.36186394416336  |
| H  | 1.28363075348285  | 2.598535154111057 | -0.90618387195700 |
| H  | -1.57761124856258 | 4.6847585917043   | 0.11232907564009  |
| H  | 0.7576095817857   | 4.42409683843104  | -0.47534216669039 |
| C  | 2.47643254422428  | -0.56433591335407 | -2.31575049877221 |
| H  | 0.87609482026248  | -1.52897293337151 | -4.02001106900230 |
| H  | -1.21297242619750 | -4.75960902660989 | 4.17822755991317  |
| H  | -2.83973184621437 | -3.00440390572942 | 3.71935696426628  |
| H  | 2.61807484490493  | 2.26826207160334  | 4.95007418731296  |
| H  | 3.62325902096644  | -0.22070453510849 | 3.46905621410945  |
| H  | 1.51527385086286  | -1.21978129348226 | 5.95622910698350  |
| Al | -0.21591445349508 | -0.39486440165994 | 1.22180202877873  |
| O  | -2.61397102143518 | 0.23717828489294  | 0.15540643829166  |
| O  | -2.04384834707241 | -0.00261741783702 | 1.26786254390106  |
| C  | -1.58603485741725 | 1.33609412439842  | -2.18716408580260 |
| H  | -2.25434336423812 | 2.04478436830376  | -2.65447870749721 |
| C  | -1.04233196995964 | 0.21206329640465  | -2.77241305464126 |
| H  | -1.23159881001769 | -0.16686259353036 | -3.76442267318174 |
| N  | -0.22919589176244 | 0.33310090798999  | -0.67913887232868 |
| H  | -2.49178717768766 | -0.48175593358696 | -0.66827055260566 |
| C  | -3.96224522426985 | 0.92445181083399  | 0.18762734965763  |
| C  | -6.14802595082887 | 0.56759849188065  | -0.26385112822254 |
| C  | -5.67406518992745 | 2.19224686023988  | 1.51106015520940  |
| H  | -6.75990926457582 | 1.21353314748733  | 1.07493049692001  |
| H  | -4.30681480729196 | 1.51877887459354  | 1.55030427526343  |
| C  | -0.50880222424368 | -0.08410310414719 | -0.23998938669515 |
| H  | -6.43805161396385 | 1.33182875569946  | -1.04909266017979 |
| H  | -5.64699088642317 | 3.04014367927678  | 0.8163333812054   |
| H  | -6.86187515390358 | 0.43158128648557  | 1.83515462191976  |
| H  | -4.3152353478369  | 0.72236474092475  | 2.2996685795578   |
| H  | -5.03921849230554 | -0.9301118313209  | 0.45610934328773  |
| H  | -3.95915035790433 | 1.72149064040715  | -0.56258826913665 |
| H  | -7.17642342156428 | -0.17194891465666 | -0.53417806665504 |
| H  | -5.91378232615456 | 2.60797089765218  | 2.49278229124713  |
| H  | -7.72955052710685 | 1.71559404868987  | 1.01530550369986  |
| H  | -3.53467702199903 | 2.21783401702805  | 1.87668091255418  |
| H  | -4.79875126339522 | -0.49184116599865 | -1.22560384131495 |

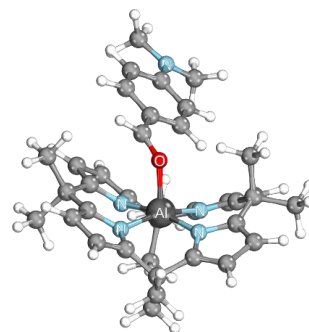

### [1]-*p*-dimethylaminobenzaldehyde sigma adduct isomer B

|    |                   |                    |                   |
|----|-------------------|--------------------|-------------------|
| Al | 2.26771476900095  | 8.12628216822929   | 12.72896043232855 |
| O  | 3.15827900376959  | 8.19869364869365   | 11.01759562197424 |
| N  | 3.75526856187399  | 7.44027823268907   | 13.83350861858565 |
| N  | 0.50740697005558  | 8.69588373519538   | 12.10158378180287 |
| N  | 2.64280085272466  | 9.8896320880064    | 13.47103962898979 |
| N  | 1.67968442719566  | 6.26768858359343   | 12.34209071683670 |
| C  | 1.74231915718146  | 10.89481452968588  | 13.71466264272294 |
| C  | -0.08215893385970 | 8.19909084733290   | 10.96265884013380 |
| C  | 4.23647741888120  | 6.21125459099556   | 10.24650189167255 |
| C  | 2.29055607282437  | 5.13959016253001   | 12.79723938362609 |
| C  | 3.87843807697459  | 10.37316048138127  | 13.83271751749888 |
| C  | 2.88884030410022  | 5.11031305160766   | 14.17200519080865 |
| C  | -0.04429998675564 | 9.92858580282719   | 12.32396366233746 |
| C  | 5.86846360406950  | 3.91787333096356   | 10.35827383401142 |
| C  | 3.95032438183095  | 6.16229556085617   | 14.28601834675131 |
| C  | 5.10365845980319  | 6.00264618961676   | 11.32359630030749 |
| H  | 5.18276331520585  | 6.73155867305934   | 12.11619214157214 |
| H  | 1.77970636953270  | 5.36925124767414   | 15.21145481433217 |
| H  | 1.32057818032020  | 6.34832779698482   | 15.07602000145485 |
| H  | 2.19293349781002  | 5.33528047991741   | 16.22157288177040 |
| H  | 0.98837590576640  | 4.62086407344330   | 15.12936233173135 |
| C  | -0.93984044696677 | 10.23564470964494  | 11.32992501357496 |
| H  | -1.52677566928115 | 11.13684683367107  | 11.24488042779631 |
| C  | 4.91746388406870  | 8.13322854759356   | 14.08811549799567 |
| C  | 5.00551026035756  | 4.14097224516720   | 9.26127759265317  |
| H  | 4.93284097759330  | 3.42321370539614   | 8.46735164117007  |
| C  | 1.09215944570451  | 5.95082375303969   | 11.14070184294000 |
| C  | 2.39024313044982  | 12.00235889732899  | 14.20043194073945 |
| H  | 1.93897207118516  | 12.93930186902427  | 14.48752425078207 |
| C  | 3.7861697564621   | 4.63385648482938   | 10.82778703282235 |
| H  | 1.02715999397179  | 4.09053263912903   | 9.96203806704886  |
| C  | 3.75893364115687  | 11.66930725938887  | 14.27283539481389 |
| H  | 4.55512787893994  | 12.31019290134887  | 14.61760398863933 |
| C  | 3.34466269281949  | 7.32554048186944   | 10.15696797072668 |
| H  | 2.87398356890614  | 7.44876209736727   | 9.9127457825798   |
| C  | 2.13981713682077  | 4.11240099615686   | 11.88654914469045 |
| H  | 5.25944612524226  | 3.11015544464621   | 11.97239852062620 |
| C  | 5.90792996493962  | 4.88757477136408   | 11.37368532096503 |
| H  | 6.54484825403045  | 4.77605949357163   | 12.23840571092937 |
| C  | -0.01549680820281 | 6.76198625381799   | 10.51865261477348 |
| C  | 0.26435633684197  | 10.68511951425808  | 13.57817982341304 |
| C  | 4.21797168123334  | 5.26176665050756   | 9.21828174881585  |
| H  | 5.53516546205663  | 5.39611384050534   | 8.38747296917864  |
| C  | -0.95638607369523 | 9.13043611377948   | 10.45206111723541 |
| H  | -1.58464854808848 | 9.01163857180223   | 9.58122384749293  |
| C  | 5.83204648303423  | 7.29255997799260   | 14.6850519440671  |
| H  | 8.82715486646704  | 7.55205539799672   | 15.01056642559962 |
| C  | 5.21040765374674  | 6.03353807154049   | 14.91806962250299 |
| H  | 5.63677849454110  | 5.14680302390803   | 15.26242262269160 |
| H  | -1.33676829603205 | 6.09430716960797   | 10.98108058334220 |
| H  | -1.40502293447335 | 6.12033104261886   | 12.06843047116007 |
| H  | -1.37984592280057 | 5.04979833219089   | 10.66419858794311 |
| H  | -2.20107335688012 | 6.62409791530984   | 10.57619689256609 |
| C  | 5.14863064251042  | 9.57797701166875   | 13.72099310816745 |
| C  | -0.25184374473851 | 9.88362012339778   | 14.79232537873713 |
| H  | 0.23198843907379  | 8.90922842173629   | 14.86847051365470 |
| H  | -1.32743438473627 | 9.71028661239353   | 14.71157979023195 |
| H  | -0.04910008057638 | 10.42379683712292  | 15.71947256984760 |
| C  | 0.03091197110546  | 6.67927873304329   | 8.98751503876974  |
| H  | -0.86146670483840 | 7.12670786641982   | 8.54836166055105  |
| H  | 0.07449905966641  | 5.64378846026418   | 8.64537107234866  |
| H  | 0.88857720092191  | 7.21141920582900   | 8.57707820700748  |
| C  | 3.48270356139939  | 3.73139139994990   | 14.45055966781799 |
| H  | 2.71455957123189  | 2.96106090042250   | 14.36703883417922 |
| H  | 3.89087951610579  | 3.68339355253820   | 15.46094215544647 |
| H  | 4.28283584498927  | 3.49565105129243   | 13.74720322338659 |
| C  | -0.45866255675192 | 12.03027094978099  | 13.56917301105827 |
| H  | -0.27956588202033 | 12.570777934526720 | 14.49936877021090 |
| H  | -1.53613133806289 | 11.88490351481785  | 13.47634983239900 |
| H  | -0.12256200883437 | 12.65570881857072  | 12.74205073033320 |
| C  | 6.18837813354929  | 10.16504171909780  | 14.68560537225837 |
| H  | 6.39028395174056  | 11.20905051195187  | 14.4455447814014  |
| H  | 7.13768421723645  | 9.63412405105497   | 14.60405535751742 |
| H  | 5.84772986435550  | 10.18469383235950  | 15.7185959611149  |
| C  | 5.75239223103312  | 9.70801478430908   | 12.30601798532585 |
| H  | 5.06645143540178  | 9.37517384573393   | 11.53367354200024 |
| H  | 6.67020072180053  | 9.1198836366112    | 12.22510087026231 |
| H  | 5.991508367352513 | 7.0351636407518    | 12.0996858368920  |
| N  | 6.63986117234948  | 2.79257891076899   | 10.4295063626405  |
| H  | 3.73149930275394  | 2.51599968911862   | 11.6387573964925  |
| H  | 1.12165564251042  | 1.27527554251042   | 12.72099310816745 |
| H  | 6.72207730745140  | 2.436877887613314  | 12.51535215879220 |
| H  | 1.10216919557508  | 3.28133645620839   | 11.84490228279200 |
| C  | 6.95451378128008  | 1.75727951122462   | 10.4011267500304  |
| C  | 5.4902510699499   | 1.32183006407466   | 9.423697740446825 |
| H  | 7.200440068373855 | 0.95644595398554   | 9.64978464387781  |
| H  | 6.713730533119431 | 2.125817089591043  | 8.43569524488933  |

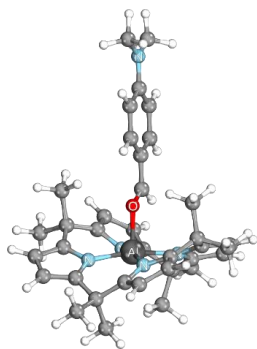

### [1]-*p*-dimethylaminobenzaldehyde sigma adduct isomer A

|    |                   |                   |                   |
|----|-------------------|-------------------|-------------------|
| C  | 2.68848251736592  | 1.89249837536082  | 0.85809161672400  |
| C  | -2.43801706063989 | 3.42849590645412  | 1.89276939395397  |
| C  | 2.30026440353993  | -2.06618005671448 | -4.23606030483447 |
| H  | 2.50229035501181  | -1.52711800511467 | -5.14995106446481 |
| C  | -2.76343694066607 | -1.16390914703930 | -1.08719396144524 |
| C  | -2.01391924522432 | 3.56871997915381  | 0.41378610931440  |
| C  | 1.75413101325235  | -3.38929529914836 | -1.86673180956408 |
| H  | 1.52341236478196  | -3.90269316349240 | -0.94068756578775 |
| H  | -2.06838710916818 | 2.50170349709891  | 2.33443109063686  |
| C  | -3.95330960468071 | 1.06901886358399  | -1.50194691775158 |
| H  | -4.76464069226783 | 0.69820466001508  | -2.10974771799630 |
| H  | -3.52663140243540 | 3.42049977021406  | 1.98061292730968  |
| H  | -2.03904239058137 | 4.25367907066703  | 2.48661481643083  |
| C  | -2.16397435485279 | -1.47798934000359 | -2.47361194921880 |
| H  | -2.86722757026564 | -1.18569661636050 | -3.25594812942834 |
| C  | 3.11496505171235  | 0.10199125127012  | 2.66024572757179  |
| H  | 4.16032191752064  | 0.30263552022586  | 2.83615774464678  |
| C  | 2.33081114911971  | -0.86761555402027 | 3.32044757237235  |
| H  | 2.65821825953569  | -1.54586605165977 | 4.09338462774985  |
| H  | -1.95137692992286 | -2.54417320159358 | -2.58322721495130 |
| H  | -1.24497401225281 | -0.92557091368584 | -2.65396332000655 |
| C  | 0.19467541839948  | -2.72334885463340 | 4.05337171029161  |
| H  | -0.69874330484052 | -3.2905582194167  | 4.31963873142910  |
| H  | 0.66827727146496  | -2.39394520100716 | 4.97908552972433  |
| H  | 0.88650489898919  | -3.39291699579218 | 3.54132927228535  |
| C  | -4.15570088711583 | -1.82533714865956 | -1.03961295479297 |
| H  | -4.63363201900436 | -1.64479894515524 | -0.0779790161904  |
| C  | -2.5773583690885  | 4.89089723431819  | -0.10408341110571 |
| H  | -2.19465723694739 | 5.72817575011703  | 0.48091126505733  |
| H  | -3.66469605790504 | 4.90639868400122  | -0.0192755378617  |
| H  | -2.31186380277764 | 5.05172291853250  | -1.14894957005237 |
| H  | -4.07920946261629 | -2.90385389420244 | -1.18476433199933 |
| H  | -4.80622401620985 | -1.4363531244318  | -1.82413750992287 |
| C  | 3.83065193196297  | 2.66726946512306  | 1.53392747195693  |
| H  | 4.15699199762320  | 3.49988636900187  | 0.91010323105635  |
| H  | 4.69986431765537  | 2.02541863211029  | 1.68337417824701  |
| C  | 3.52154135170468  | 3.06051705526778  | 2.50113936786947  |
| C  | 3.25745444385908  | 1.37946200719032  | -0.4836959699815  |
| C  | 2.49431596947198  | 0.92955923263957  | -1.11050807760953 |
| H  | 4.04198262844310  | 0.63876063343206  | -0.31185116038937 |
| H  | 3.68326734934508  | 2.21254197889839  | -1.04766522095167 |
| Al | -0.43595117573444 | 0.63821226778232  | 0.60896745075746  |
| O  | 0.46955233403099  | -0.1847608892697  | -0.92047443015779 |
| N  | 1.02650275926387  | 0.21712354396884  | 1.84523142666888  |
| N  | -2.09130077703987 | 1.15590125040093  | -0.25262867753083 |
| N  | 0.22627382299460  | 2.45391025953358  | 0.55233147885337  |
| C  | -1.32516103438054 | -1.07883653867735 | 1.02747145927890  |
| C  | -0.51541433879553 | 3.58622084918575  | 0.33725236998587  |
| C  | -2.94411874162226 | 0.32431374845875  | -0.93623652850021 |
| C  | 1.44327329132637  | -2.03519375050970 | -1.98398322749059 |
| C  | -0.85818277383554 | -1.98954696149765 | 1.93202828870038  |
| C  | 1.54351129465033  | 2.84165774824890  | 0.61625652198901  |
| C  | -0.17259026630293 | -1.52506753610588 | 3.18205787039840  |
| C  | -2.59052575658694 | 2.42574726173023  | -0.36855466107895 |
| C  | 6.2002691117258   | -3.43690929205550 | -4.12344964570968 |
| C  | 1.06424803533140  | -0.76356991733960 | 2.80013479840270  |
| C  | 1.72330851300160  | -1.38801909792367 | -3.19019257626684 |
| H  | 1.48310365741217  | -0.33843579300208 | -3.29977175910210 |
| C  | -1.12098057024765 | -0.62302730705426 | 3.99461944176511  |
| H  | -1.42600898090238 | 0.26109306969193  | 3.43477194856233  |
| H  | -0.62665559840403 | -0.27910517688323 | 4.90523118337094  |
| H  | -0.20941466971509 | -1.16365930054993 | 4.26949812997866  |
| C  | -3.72986700747102 | 2.41255817112001  | -1.1359582091568  |
| H  | -4.34726667453912 | 3.26003849729634  | -1.38957757580352 |
| C  | 2.28973353206853  | 0.75677033732390  | 1.77290133205118  |
| C  | 2.32825317328180  | -0.08411091749490 | -2.90680564950991 |
| H  | 2.54567302595255  | -5.13324872922968 | -2.77139316177826 |
| H  | -1.94932825567621 | -1.78262563843238 | 0.02579271202972  |
| C  | 0.31405113135949  | 4.67515789617392  | 0.23376419003737  |
| H  | 0.01691305773451  | 5.70068321364628  | 0.07865048814407  |
| C  | -1.82589069049068 | -3.13532791024961 | 0.27760693320808  |
| H  | -2.23769332359934 | -3.93657622266384 | -0.31860992396096 |
| C  | 1.63100859652513  | 4.17979306579327  | 0.40774416095539  |
| H  | 2.53153384120735  | 4.79208608555958  | 0.39511980186558  |
| C  | 0.8329059667666   | -1.36361508937867 | -0.86676021555905 |
| H  | 0.7298932255521   | -1.94165416706083 | 0.06034818086775  |
| C  | -1.13654143765342 | -3.26891659690610 | 1.50346841317215  |
| H  | -0.90551093733245 | -4.18811380330146 | 2.01976608590707  |
| N  | 3.19160835065685  | -4.11139360942956 | -5.16174704150763 |
| C  | 3.50427957502297  | -5.51046157710005 | -5.02689228348078 |
| H  | 4.21737398244590  | -5.69742001748363 | -4.21869238811109 |
| H  | 3.95328919022922  | -5.87179630082436 | -5.94830801598683 |
| H  | 2.61356564307460  | -6.11602819560742 | -4.83554919126125 |
| C  | 3.47579467596693  | -3.42962323987549 | -6.39841569351607 |
| H  | 3.93045304965331  | -4.12559004096355 | -7.0949763932304  |
| H  | 4.17482783814001  | -2.59987320300894 | -6.26013643538534 |
| H  | 2.57191582912765  | -3.03290917784662 | -6.86962490787263 |

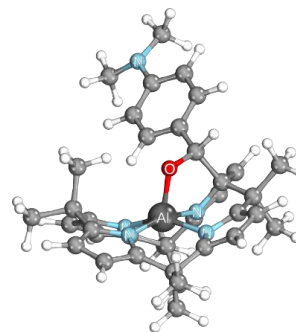

### [1]-*p*-dimethylaminobenzaldehyde 1,2 adduct isomer B

|    |                   |                   |                    |
|----|-------------------|-------------------|--------------------|
| Al | 2.06428190995192  | 8.03548609819738  | 12.53569611220494  |
| O  | 0.09856779725366  | 7.98828630863338  | 11.07237499355034  |
| N  | 3.75589636215292  | 7.42058983774646  | 13.44039370214213  |
| N  | 0.26388298035805  | 8.51753844947204  | 12.12597949665146  |
| N  | 2.55203672521575  | 9.81916758249025  | 13.16138708109743  |
| N  | 1.44013328181266  | 6.20525046545658  | 12.94451288424954  |
| C  | 1.71867249853545  | 10.89715692391661 | 13.05821719391734  |
| C  | -0.63516773196196 | 7.69325098673823  | 11.50073243970074  |
| C  | 4.90225209383273  | 6.45551036132603  | 10.68938354630073  |
| C  | 1.96559299295677  | 5.26553958635575  | 13.7919156893854   |
| C  | 3.83451588000190  | 10.28294073752157 | 12.97658589506565  |
| C  | 3.02937885865357  | 5.59331207678370  | 14.81523966751949  |
| C  | -0.37039771781125 | 9.70268382993491  | 12.38172143681163  |
| C  | 5.84961931825142  | 3.91253198284090  | 9.85109927200926   |
| C  | 4.09228705626480  | 6.38514011573523  | 14.1105963975289   |
| C  | 4.12216381901528  | 5.31445067552133  | 10.82904537753880  |
| H  | 3.13154720147122  | 5.37804281515443  | 11.25832805632512  |
| C  | 2.4496404639308   | 6.45667879309114  | 15.95129877695275  |
| H  | 2.01006947542522  | 7.37868305582180  | 15.57291899350816  |
| H  | 3.21808035396262  | 6.72673036724911  | 16.68105686768700  |
| H  | 1.66543816932040  | 5.89981567303215  | 16.46443916516846  |
| C  | -1.65537543945928 | 9.64755465745837  | 11.89585650037117  |
| H  | -2.40317918110285 | 10.42315782007097 | 11.9588263108013   |
| C  | 4.7997553348423   | 7.96910099272746  | 12.73598254519642  |
| C  | 6.62824762776595  | 5.06639718599513  | 9.69547930382786   |
| H  | 7.61008911471342  | 5.01911422869174  | 9.24503823439750   |
| C  | 0.47988783048331  | 5.58096553559917  | 12.19456675041523  |
| C  | 2.45022048479588  | 12.03683450026949 | 12.81947059314426  |
| H  | 2.06747533012834  | 13.03748086701175 | 12.69362163707846  |
| C  | 0.40240666588272  | 4.25283087562141  | 12.55882892930268  |
| H  | -0.26013646421548 | 3.50810486215226  | 12.14659875091485  |
| C  | 3.80467176733772  | 11.64146526140996 | 12.76060556652272  |
| H  | 4.65183784063806  | 12.29077196148295 | 12.597849074867583 |
| C  | 4.44507740497639  | 7.80756196483196  | 11.20058319131812  |
| H  | 5.00330249462803  | 8.57311753336063  | 10.63901845687944  |
| C  | 1.35332031202575  | 4.05110868379484  | 13.58219761388277  |
| H  | 1.54829832118631  | 3.12721116646550  | 14.10531172542201  |
| C  | 4.58537226873999  | 4.07152046953944  | 10.4398887157260   |
| H  | 9.39091880582007  | 3.2255880645288   | 10.58968007809359  |
| C  | -0.28760486227782 | 6.28332496808004  | 11.09501098251525  |
| C  | 0.23776993464718  | 10.75675869902753 | 13.27126699695638  |
| C  | 6.15037238804700  | 6.30168272609297  | 10.1033052058593   |
| H  | 6.78150916211084  | 7.17353602597940  | 9.95898671080663   |
| H  | -1.82395416385506 | 8.36266790642071  | 11.33044588679064  |
| H  | -2.71975931189718 | 7.98038196533974  | 10.86613476650305  |
| C  | 6.00139908093692  | 7.07757787757872  | 13.15678354250323  |
| H  | 7.02533507201762  | 7.17767496161838  | 12.8294022931538   |
| C  | 5.52606414834810  | 6.14060980104289  | 13.98810248666041  |
| H  | 6.07053377026495  | 5.32830232595655  | 14.44357604287895  |
| C  | -1.58020686151887 | 5.50915028344729  | 10.82149255432078  |
| H  | -2.21087013541592 | 5.45608110807970  | 11.70865437959499  |
| H  | -1.3590193096950  | 4.49282848440527  | 10.49250784605502  |
| H  | -2.14805681248927 | 5.98709138757397  | 10.0226319555980   |
| C  | 5.07862937706006  | 9.45208079982736  | 13.18810142828281  |
| C  | -0.01267601569638 | 10.35716896636971 | 14.74185763869922  |
| H  | 0.43632360449986  | 9.39026208318015  | 14.97070803049381  |
| H  | -1.08377307175403 | 10.27709937301671 | 14.93781751030124  |
| H  | 0.41819645120733  | 11.09532449589886 | 15.42277923446199  |
| C  | 5.52544182927868  | 6.27928347594163  | 9.78300374511819   |
| H  | -0.06120442227499 | 6.7390369862458   | 8.98461728911990   |
| H  | 0.76726060096976  | 5.25460015283665  | 9.48925520732523   |
| H  | 1.45833641739804  | 6.83142746616943  | 9.86659921395165   |
| C  | 3.61663952895866  | 4.31883560600587  | 15.41523182374654  |
| H  | 2.84208499084118  | 3.75403058351717  | 15.93308280006061  |
| H  | 4.39403644634277  | 4.55203457960742  | 16.14592195623176  |
| H  | 4.04377478505094  | 3.67396907328619  | 14.64661124115896  |
| C  | -0.44891251098458 | 12.09961397967182 | 13.02632271302846  |
| H  | -0.04207820677911 | 12.86743587536477 | 13.68663020354725  |
| H  | -1.51799865358942 | 12.02854798384978 | 13.22860772281317  |
| H  | -0.31997424124844 | 12.42668877352735 | 11.99463630969504  |
| C  | 5.41645908848046  | 9.48643407926518  | 14.69170281748888  |
| H  | 5.056982819149942 | 10.52572050001495 | 15.00749994174860  |
| H  | 6.355549828727539 | 8.97732153611587  | 14.992240028720874 |
| H  | 4.62457876954784  | 9.03787360710960  | 15.29058948706099  |
| C  | 6.26148148739168  | 10.06738662983157 | 12.4345721314      |

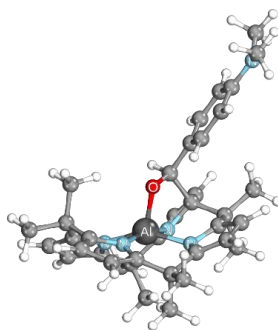

**[1]-*p*-dimethylaminobenzaldehyde 1,2 adduct isomer A**

|    |                   |                   |                   |
|----|-------------------|-------------------|-------------------|
| N  | -0.02595121846497 | -2.32852685977424 | 0.40717409359662  |
| C  | -0.21153885382885 | -3.52023570966519 | 1.05374601477762  |
| C  | 0.41166520208561  | -2.62333909096500 | -0.85811690742795 |
| C  | 0.11004652059848  | -4.56096639462138 | 0.20942941301980  |
| H  | 0.0600906640636   | -5.61454933277229 | 0.4350982991508   |
| C  | 0.50919990725911  | -3.98646414526545 | -1.01569503622831 |
| H  | 0.83325549851899  | -4.51620694450909 | -1.89869992457609 |
| N  | 0.04955890578709  | -1.27451901431384 | 2.93128627922971  |
| C  | 0.65295371983573  | -0.60301446902979 | 3.96001995069761  |
| C  | -0.16012150392167 | -2.56422563477240 | 3.34649687170467  |
| C  | 0.80141698347919  | -1.44814761830340 | 5.03371347327789  |
| C  | 0.27906133548739  | -2.70241102609586 | 4.64178695198842  |
| H  | 0.24621539381779  | -3.59795317737187 | 5.24278516208735  |
| N  | 0.00311092225939  | -1.26091510148458 | 1.65594864891881  |
| C  | -0.73485814577315 | 2.29260858056964  | 1.11686843210396  |
| C  | 0.35432043813380  | 1.64485598046746  | 2.92064332341540  |
| C  | -0.84830975801245 | 3.30910163292804  | 2.03550797602291  |
| H  | -1.36038392677294 | 4.24921764729190  | 1.89730777835742  |
| C  | -0.14617639852246 | 2.89706063357417  | 3.19075304154990  |
| H  | -0.02641772602377 | 3.45816441071373  | 4.10440577169346  |
| C  | -0.28227348498326 | -0.50393773681758 | -1.81691022158090 |
| C  | -1.66815267750812 | 0.95508812630289  | -0.82791806522053 |
| H  | -0.04265895016410 | -2.63575100500593 | -3.57543547594638 |
| C  | 0.89660249426145  | -2.15410239234330 | -3.27042726172867 |
| C  | 2.12843759966383  | -0.9077193699229  | -1.50543991847055 |
| H  | 0.78099410501952  | -1.56110455970412 | -1.86796419006637 |
| H  | 2.91325437747772  | -1.66370244993576 | -1.52670072700471 |
| H  | 1.67569235732159  | -2.90450018361157 | -3.30479675210500 |
| H  | 2.10925267803041  | -0.47647323402949 | -0.50487663665106 |
| H  | -2.62436875010304 | -2.48161671705048 | 2.02279283507637  |
| C  | -2.31532114816806 | -3.44976888769900 | 2.40960887601955  |
| C  | -0.48747084079550 | -4.99542404073948 | 3.02527054053797  |
| C  | -0.78047429701018 | -3.60694657963370 | 2.45156902046445  |
| H  | 0.58370418017312  | -5.18925966855755 | 3.07780367779353  |
| H  | -2.75578931054488 | -4.22264641512315 | 1.77477472173193  |
| H  | -0.95030122438197 | -5.77105024989976 | 2.41346970344523  |
| H  | 3.06423017059142  | 1.62838069109692  | 2.94980459815490  |
| C  | 2.61159202159570  | 0.64517510922664  | 3.10038123787396  |
| C  | 1.43741745590218  | 1.43537966632914  | 5.14100194421932  |
| C  | 1.23061810349706  | 0.77638517482550  | 3.77816398383723  |
| H  | 2.11691001288250  | 0.84440021768185  | 5.75594664452632  |
| H  | 2.52999076504588  | 0.16299082149805  | 2.12603382260063  |
| H  | 0.49467670192144  | 1.53605811736725  | 5.67886814439752  |
| C  | -1.15218038941351 | 2.34634112329772  | -0.33108294987232 |
| C  | -2.18168962099339 | 3.45837300561005  | -0.56544632180160 |
| C  | 0.09645579176823  | 2.73875043385534  | -1.15306197425179 |
| H  | -2.50030355034387 | 3.48815359593084  | -1.69030403394854 |
| H  | -0.11552308124447 | 2.82246915951602  | -2.22225754070924 |
| C  | -0.36705218910371 | 3.36987269449890  | 0.05604954092843  |
| H  | 0.91665538268437  | 2.03703654736352  | -1.01373525326666 |
| H  | -1.72305255876226 | 4.24408014647847  | -0.34964213447526 |
| H  | 0.44678224697264  | 3.70985720578552  | -0.80288453153116 |
| H  | 2.39252188162487  | -0.11210313856107 | -2.20826687381419 |
| H  | 1.13835513871758  | -1.38425608930255 | -0.00328414251665 |
| H  | -0.90378802494849 | -5.08860096219706 | 4.02903540557814  |
| H  | -2.72616815670069 | -3.55170174461422 | 3.41670585933477  |
| H  | 1.87846195612979  | 2.42706300678733  | 5.02643983478865  |
| H  | 3.28042748456147  | 0.03809410971962  | 3.71376937741295  |
| H  | 1.25482569615559  | -1.21085376203841 | 5.98393565117875  |
| Al | -0.48108200619740 | -0.59169804893904 | 1.22908823805051  |
| C  | -2.79816706732433 | 0.19390888328934  | 0.03068933322768  |
| O  | -2.25532869119800 | -0.33347171207232 | 1.16449813033716  |
| H  | -1.96320468518051 | 0.91265309177142  | -2.28734951318154 |
| H  | -2.73166346285070 | 1.49474702016911  | -2.77452304298681 |
| H  | -1.13316849207345 | 0.03639608408083  | -2.87379835034424 |
| H  | -1.10257136729472 | -0.24690144616361 | -3.91491331938209 |
| H  | -0.57549559186915 | 0.03105561967608  | -0.69372080687761 |
| H  | -3.1326938126109  | -0.60287622406643 | -0.66081959397352 |
| C  | -3.99859999210254 | 1.0535710402892   | 0.32721817587331  |
| C  | -6.21980171663415 | 2.73446803511708  | 0.86472148391099  |
| C  | -4.17284804527146 | 1.63451627369654  | 1.57772150505363  |
| C  | -4.97241706401162 | 1.29491819515626  | -0.63023219023658 |
| C  | -6.06131055818361 | 2.11515081050545  | -0.38194949211385 |
| C  | -5.25496113668948 | 2.45514695334544  | 1.84333057820870  |
| C  | -3.43879424308189 | 1.45011143526796  | 2.35015508111083  |
| H  | -4.89287036001360 | 0.82210993297213  | -1.60405263816235 |
| H  | -6.78667701046056 | 2.54723779205055  | -1.1694288227809  |
| H  | -5.33489627134753 | 2.87747306117193  | 2.83503404839312  |
| N  | -7.28694329836796 | 3.58632611208307  | 1.12045299817566  |
| H  | -8.39312817750575 | 3.59288179917587  | 0.20314052742402  |
| H  | -8.07857954974302 | 3.90876465875888  | -0.79380117880396 |
| H  | -9.1374880074528  | 3.14244732749301  | 0.54016563926586  |
| H  | -8.8862238941656  | 2.61758458353829  | 0.10187603447274  |
| C  | -7.55790931764027 | 3.95573382131608  | 2.48403853200757  |
| H  | -6.71432746580187 | 4.49168077271145  | 2.92249935598060  |
| H  | -7.78371088029431 | 3.10122519328744  | 3.13547876669613  |
| H  | -8.41015250663677 | 4.63280707685702  | 2.51094669582864  |

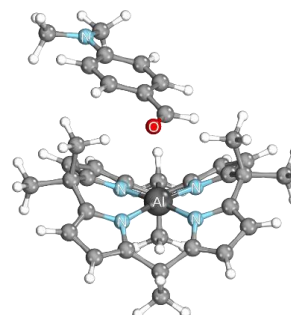

**[1]-*p*-dimethylaminobenzaldehyde TS 1/2**

|    |                   |                    |                   |
|----|-------------------|--------------------|-------------------|
| C  | 2.51292877795582  | 2.57203263186249   | 0.81514528907096  |
| C  | -2.65959658893969 | 2.78846843160384   | 2.57292222847693  |
| C  | 1.24529721570657  | -4.02007885855610  | -2.96305382922230 |
| H  | 0.54185089063022  | -4.40863528288889  | -3.68498376702752 |
| C  | -2.50990343179044 | -0.427351139155603 | -1.85634899679325 |
| C  | -2.38125415007152 | 3.50929041454911   | 1.23459362563373  |
| C  | 2.96405079591308  | -2.96323069595988  | -1.07620044538022 |
| H  | 3.60981204518515  | -2.55048732400256  | -0.30927136221149 |
| H  | -2.12732312206652 | 1.83765110522376   | 2.64384264888208  |
| C  | -0.09877067318500 | 1.54144390822012   | -1.38131953808193 |
| H  | -4.90488678406868 | 1.26939102340972   | -2.04432458131607 |
| H  | -3.72441120426077 | 2.57091531533116   | 2.67782724211789  |
| H  | -2.33580812208024 | 3.40327712022444   | 3.41515520288643  |
| C  | -1.72178346466321 | -0.07336184748938  | -3.13395430152588 |
| H  | -2.35627639707964 | 0.50811514128335   | -3.80600138198373 |
| C  | 3.37396590443905  | 0.36732220309094   | 1.84976776617012  |
| H  | 4.40313374775746  | 0.65058827069495   | 2.00595919525663  |
| C  | 2.78974333107609  | -0.87883774162781  | 2.17217915779666  |
| H  | 3.28160553734159  | -1.72212402975793  | 2.63196731969928  |
| H  | -1.40928300035718 | -0.98052645650344  | -3.65825201648959 |
| H  | -0.83376094295832 | 0.51274629736259   | -2.92168423987428 |
| C  | 0.96413588196986  | -3.14883456250974  | 2.41629103569811  |
| H  | 0.1731290665842   | -3.87895739338136  | 2.59231854695067  |
| H  | 1.54106410376761  | -3.06153661204588  | 3.3381061526160   |
| H  | 1.61733696983847  | -3.53720056888380  | 1.63402915987664  |
| C  | -3.78042857095802 | -1.19304607607452  | -2.31029099007859 |
| H  | -4.38601930432556 | -1.46819639692135  | -1.46228421140447 |
| C  | -3.1686540854209  | 4.81829346336735   | 1.24414897338260  |
| H  | -2.86459593863122 | 5.44507657009812   | 2.08321774082287  |
| H  | -4.23621041452453 | 4.62524267072961   | 1.35555481659333  |
| H  | -3.01494137485859 | 5.7861512539928    | 0.32225952387778  |
| H  | -3.48425547302059 | -2.10324272880497  | -2.84394651305523 |
| H  | -4.35477407991030 | -0.59162940621967  | -2.99909860721006 |
| C  | 3.66403135776773  | 3.25378499327410   | 1.56332869611675  |
| H  | 3.79737165422637  | 4.27826582226204   | 1.21431330582857  |
| H  | 4.60506966119091  | 2.73311707762060   | 1.38164406748699  |
| H  | 3.48303664024300  | 3.27483991314432   | 2.63728689602885  |
| C  | 2.87096789745392  | 2.60673906481394   | -0.68486721264973 |
| H  | 2.07696649300409  | 2.19922017644334   | -1.30428717867250 |
| H  | 3.78059805569543  | 2.03276197143620   | -0.87973384831412 |
| H  | 3.03932364735725  | 3.63874743204589   | -0.99947050823921 |
| Al | -0.42997008527516 | 0.97700053563972   | 0.40330207466420  |
| O  | 1.13369583026124  | 0.05388057438865   | -1.72041463211532 |
| N  | 1.20151921742821  | 0.44460231040893   | 1.29688821783814  |
| N  | -2.14826944393522 | 1.51601948158883   | -0.26998375265379 |
| N  | -0.00426310091218 | 2.79787801246941   | 0.86499482494505  |
| N  | -0.94801171319487 | -0.85109170382661  | 0.11664069097264  |
| C  | -0.91356132785080 | 3.79409309971896   | 1.131007044362683 |
| C  | -2.93812908796262 | 0.84011450116756   | -1.17170659341680 |
| C  | 2.04609364396559  | -2.12882160175027  | -1.70523234829739 |
| C  | -0.43505127218457 | -1.94653211975781  | 0.76206200728647  |
| C  | 1.24600685059708  | 3.34345496946635   | 1.04630838464860  |
| C  | 0.36770644105102  | -1.79951701945196  | 2.02249467178754  |
| C  | -2.84569891164270 | 2.63933492304732   | 0.10626331630984  |
| C  | 2.16993645077014  | -4.87177678424941  | -2.33014117220300 |
| C  | 1.46409327600662  | -0.79441461304070  | 1.82039476632948  |
| C  | 1.18507042526106  | -2.68161082734150  | -2.64984428620324 |
| H  | 0.44345483555566  | -2.05160924448738  | -3.12042584737563 |
| C  | -0.54976692827008 | -1.33673709620401  | 3.17297585680314  |
| H  | -1.01681130803739 | -0.37243989481655  | 2.96587511572101  |
| H  | 0.01915261617511  | -1.22826022306202  | 4.09870638199215  |
| H  | -1.35446939972449 | -2.05691798179816  | 3.33317998859358  |
| C  | -0.40211122003256 | 2.68936780403285   | -0.56015565373265 |
| H  | -4.80543098810366 | 3.44462865413247   | -0.45746091217424 |
| C  | 2.37669710675154  | 1.15872915732914   | 1.32549821379831  |
| C  | 3.03181317081137  | -4.30853909348060  | -1.37236627863422 |
| H  | 3.74523681268053  | -4.92014508219688  | -0.83933861772203 |
| C  | -1.72568706481301 | -1.31541974846888  | -0.9196882204510  |
| C  | -0.25503018048821 | 4.95290054492548   | 1.45024116256160  |
| H  | -0.70477368825676 | 5.89530566788243   | 1.72078163393497  |
| H  | -1.68259118580678 | -2.69073208673370  | -0.93209158897601 |
| H  | -2.19159426088417 | -3.34345023902668  | -1.62414451292522 |
| C  | 1.12701778678466  | 4.66562253621405   | 1.39128858866773  |
| H  | 1.93315757378634  | 5.35542989718774   | 1.58552522737774  |
| C  | 1.96204503820693  | -0.73149569194077  | -1.30089459161755 |
| H  | 2.72083826035007  | -0.41232735482482  | -0.56790296211    |

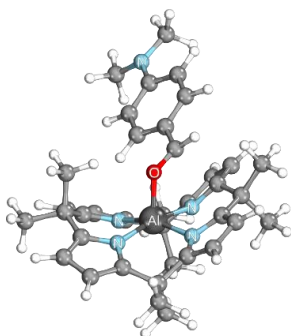

### [1]-*p*-dimethylaminobenzaldehyde TS 2 isomer B

|    |                   |                   |                   |
|----|-------------------|-------------------|-------------------|
| Al | 2.08431435472135  | 8.05532414418930  | 12.61234299069499 |
| O  | 2.97417621266321  | 7.99280053322739  | 10.98509610937659 |
| N  | 3.84065953189355  | 7.50777606562240  | 13.44425130406494 |
| N  | 0.25643793489021  | 8.54371960853230  | 12.23011573632784 |
| N  | 2.57076054366917  | 9.88298509190379  | 13.10024192890141 |
| N  | 1.47797984613264  | 6.19154100385128  | 12.84135270991804 |
| C  | 1.70383180880757  | 10.94065593057355 | 13.06851369607176 |
| C  | -0.65584578902266 | 7.75740138282736  | 11.56986056825494 |
| C  | 4.71055966011532  | 6.39365413609927  | 10.59888081433891 |
| C  | 2.05178116818432  | 5.18117970003174  | 13.56673184937953 |
| C  | 3.82371528056577  | 10.38879218856007 | 12.83731257515839 |
| C  | 3.16385351903227  | 5.42843128653356  | 14.54644126468283 |
| C  | -0.37956300157846 | 9.71658703503902  | 12.54385545894445 |
| C  | 5.76417776444483  | 3.80558018469613  | 10.15694429256993 |
| C  | 4.19889434063773  | 6.31778727254736  | 13.90884393662646 |
| C  | 3.94067303426193  | 5.25721818157395  | 10.82946464807074 |
| H  | 2.91673678446423  | 5.34358602172679  | 11.16055360913462 |
| C  | 2.61878374180114  | 6.13098402633746  | 15.80594605110627 |
| H  | 2.13167236296595  | 7.07472820596887  | 15.56251518351150 |
| H  | 3.42068682811639  | 6.34524033913893  | 16.51653760201382 |
| H  | 1.87986292288691  | 5.49362765398972  | 16.29412405177888 |
| C  | -1.66866440144487 | 9.68869398528689  | 12.07308878409631 |
| H  | -2.41051975605322 | 10.46536131218775 | 12.17804126561454 |
| C  | 4.97063668082090  | 8.12148211392458  | 12.91744267653714 |
| C  | 6.53708323491235  | 4.95970629342425  | 9.91241256335261  |
| H  | 7.55423565091442  | 4.88049794809931  | 9.5564176392837   |
| C  | 0.50624472312459  | 5.61625117779443  | 12.05695544594296 |
| C  | 2.37885263964297  | 12.09911231242037 | 12.77160978414600 |
| H  | 1.95710558802394  | 13.08784979706307 | 12.68053925729544 |
| C  | 0.47667914195292  | 4.25763909372361  | 12.28412128354431 |
| H  | -0.18354624341345 | 3.54172318266400  | 11.82042015539204 |
| C  | 3.73695388175940  | 11.74346859239015 | 12.61670906402222 |
| H  | 4.55586157448790  | 12.41734980121118 | 12.41182697644585 |
| C  | 4.7105693978517   | 7.74164291379527  | 10.84509438686398 |
| H  | 4.84894388395799  | 8.54431437186087  | 10.45137314129650 |
| C  | 1.46321612287573  | 3.97942372084926  | 13.25376931670626 |
| H  | 1.70024385666653  | 3.01407566076501  | 13.67400738665122 |
| C  | 4.5683459577902   | 3.99056864885632  | 10.62030548762830 |
| H  | 3.81073926911239  | 3.15228168976169  | 10.83708196790051 |
| C  | -0.33348051085578 | 6.37928350208675  | 11.06018849647056 |
| C  | 0.25877403057488  | 10.75536486821516 | 13.42113295092103 |
| C  | 6.01343974075419  | 6.21150732303527  | 10.13289288550983 |
| H  | 6.63950749405488  | 7.08017041806825  | 9.95859549612558  |
| C  | -1.84475782329064 | 8.43556410553554  | 11.44672447625396 |
| H  | -2.74510795920793 | 8.07919812691946  | 10.97120715582394 |
| C  | 6.06130953742119  | 7.24533594862815  | 13.13184921723729 |
| H  | 7.08988939902950  | 7.43810274652675  | 12.86451226526162 |
| C  | 5.57605223435474  | 6.10749733499806  | 13.73200410139819 |
| H  | 6.12431719843006  | 5.21243005248666  | 13.97864231564039 |
| H  | -1.64271545222049 | 5.61420200201739  | 10.83289405490294 |
| H  | -2.20687202118472 | 5.50538775859929  | 11.75851152112819 |
| H  | -1.44562076670843 | 4.62059609601911  | 10.42849953306148 |
| H  | -2.26773623685827 | 6.13331843821364  | 10.10552964192744 |
| C  | 0.1546347715646   | 9.62732908722986  | 13.05834778877495 |
| C  | 0.15423162429461  | 10.30555293000812 | 14.89417233240588 |
| H  | 0.65565104439461  | 9.35143884509236  | 15.05963692285889 |
| H  | -0.89206100516782 | 10.18033360619907 | 15.18029032787242 |
| H  | 0.61683453623524  | 11.04077393921495 | 15.55691291857965 |
| C  | 0.37453583937535  | 6.45486110047175  | 9.69047460596312  |
| H  | -0.27284964568779 | 9.95402913158573  | 9.86606178610033  |
| H  | 0.59880141751861  | 5.45052059080607  | 9.32228638907005  |
| H  | 1.30604038840951  | 7.0111412908726   | 7.3639699682730   |
| C  | 3.80356089120743  | 4.10940297866966  | 14.97209961116439 |
| H  | 3.07123327017125  | 3.47205535612882  | 15.46816115285625 |
| H  | 4.61726234882093  | 4.28563037158237  | 15.67803924129755 |
| H  | 4.20153586569518  | 3.565277930222504 | 14.11478049665661 |
| C  | -0.48450795652933 | 12.08271983834102 | 13.28563736786614 |
| H  | -0.03366924426487 | 12.84183888147977 | 13.92701918689663 |
| H  | -1.52649291880688 | 11.97434047689604 | 13.58877486343742 |
| H  | -0.46588213681733 | 12.44390935222441 | 12.25737199840546 |
| C  | 5.53187312564160  | 9.88598184474825  | 14.52473347592822 |
| H  | 5.62232184676638  | 10.95799673563637 | 14.70763043536857 |
| H  | 6.48747635431456  | 9.40679324846312  | 14.75224110895858 |
| H  | 4.78239960465413  | 9.49287054681649  | 15.21123531243664 |
| C  | 6.21395935721411  | 10.16442959183433 | 12.14965657785892 |
| H  | 5.94113275201323  | 10.12328348753985 | 11.09551442731199 |
| H  | 7.14488163388736  | 9.61105868922328  | 12.28695538247496 |
| H  | 6.42807763839565  | 11.20721893119286 | 12.38386416661773 |
| N  | 6.27816571282339  | 2.54530962528598  | 9.94063763706833  |
| C  | 5.53365291778771  | 1.4022211524624   | 10.39954507649395 |
| H  | 6.07504211109813  | 0.49285548315084  | 10.14683669043089 |
| H  | 4.55819012501894  | 1.34163865283560  | 9.91276103845294  |
| H  | 5.36320939031047  | 1.40541208857038  | 11.48283546823814 |
| C  | 7.68329885624183  | 2.39092134752666  | 9.68032148915813  |
| H  | 7.98150905616019  | 2.91291373241205  | 8.76759878716760  |
| H  | 7.90907838694236  | 1.33717433004866  | 9.53041875978262  |
| H  | 8.31951731189085  | 2.75700476198516  | 10.49589194408908 |

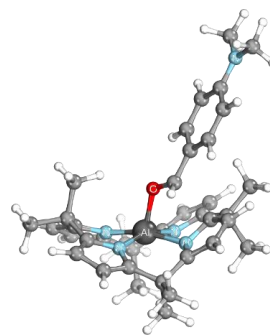

### [1]-*p*-dimethylaminobenzaldehyde TS 2 isomer A

|    |                    |                    |                    |
|----|--------------------|--------------------|--------------------|
| C  | 2.75377985802134   | 2.16305481080427   | 1.55382445335326   |
| C  | -2.65563629813628  | 3.26542667474127   | 1.18534876380471   |
| C  | 1.49795527708074   | -1.92354131721453  | -4.42252985924784  |
| H  | 1.45953426839749   | -1.30416771610599  | -5.30729814921092  |
| C  | -2.07745240845808  | -1.51167423864822  | -1.106484342821365 |
| C  | -1.81610110954439  | 3.37369935710798   | -0.10528602681894  |
| C  | 1.58121160750867   | -3.42626878718510  | -2.11051873886119  |
| H  | 1.61040206556471   | -4.02072839659826  | -1.2043863431943   |
| H  | -2.34486247535955  | 2.41805246729531   | 1.79723242695163   |
| C  | -2.61865995843398  | 0.59447809445799   | -2.42645708202156  |
| H  | -3.04210941536073  | 0.11760859505422   | -3.29676417208388  |
| H  | -3.71307174984205  | 3.13043716743954   | 0.94855727481723   |
| H  | -2.54100355314930  | 4.16711473957325   | 1.79040272324231   |
| C  | -2.07062833990699  | -2.32685337329285  | -2.35861055492727  |
| H  | -2.94486709127071  | -2.07932843532184  | -2.96133131185421  |
| C  | 2.86087398440517   | 0.61187160943450   | 3.61539111654041   |
| H  | 3.78430925451446   | 0.96832857531061   | 4.04370776981046   |
| C  | 2.05059029253381   | -0.42580153436192  | 4.12206048061167   |
| H  | 2.22985693020382   | -1.00774875929141  | 5.01313243308130   |
| H  | -2.12500355944784  | -3.39676706039720  | -2.14936020935449  |
| H  | -1.18760503966750  | -2.14483810059586  | -2.96465220353583  |
| C  | 0.08751189550932   | -2.57441200360517  | 4.39302577103488   |
| H  | -0.76251666217078  | -3.25538835109280  | 4.46927053813185   |
| H  | 0.26912997523685   | -2.16419596744036  | 5.38642850932030   |
| H  | 0.96750195279135   | -3.14913859890988  | 4.10314884965242   |
| C  | -3.42586244751081  | -1.78471324720188  | -0.35285653788721  |
| C  | -3.48557885333376  | -1.23057309804556  | 0.58313244133904   |
| C  | -2.31221301024320  | 4.59023801833017   | -0.88409055123428  |
| H  | -2.22440481011172  | 5.496028639985849  | -0.282975958947506 |
| H  | -3.36426608331479  | 4.47232483241443   | -1.14918714765948  |
| H  | -1.73931887903136  | 4.73419580881873   | -1.80018522706221  |
| H  | -3.55020974240398  | -2.84822914903781  | -0.13155007558159  |
| H  | -4.25291037048380  | -1.45957724195091  | -0.98639562599767  |
| C  | 3.74510167720529   | 3.04501280232218   | 2.32007784139984   |
| H  | 4.13797765415620   | 3.82968495545326   | 1.67257044755069   |
| H  | 4.59854307388439   | 2.45846160950645   | 2.66275112465956   |
| H  | 3.27717474169122   | 3.51354482972356   | 3.18535161280433   |
| C  | 3.53305663927465   | 1.55111808735260   | 0.37039015960601   |
| H  | 2.907920244801471  | 0.92583477177239   | -0.25904732680636  |
| H  | 4.36022121630996   | 0.93912920809593   | 0.73832588511180   |
| H  | 3.94131018005728   | 2.34693253607685   | -0.25680285963313  |
| Al | -0.05125022680469  | 0.63162992139328   | -0.673596329279848 |
| O  | 0.92274706623469   | -0.17123118893031  | -0.09186378560775  |
| N  | 1.09160049338065   | 0.37547621915488   | 2.25027605041564   |
| N  | -1.64035926643140  | 0.91070670216258   | -0.42615035636540  |
| N  | 0.40941536334011   | 2.49993812800974   | 0.66558517456775   |
| N  | -0.81642986867471  | -1.214113356219651 | 1.04727186064574   |
| C  | -0.36907742398648  | 3.55251958514079   | 0.25988939043541   |
| C  | -2.03198549399516  | -0.03229360939469  | -1.35134342145574  |
| C  | 1.26535376328331   | -2.07706731581272  | -2.02506055832727  |
| C  | -0.51504611434888  | -2.02283509074980  | 2.0474884519367    |
| C  | 1.61915337011550   | 3.01942850253658   | 1.05701989347384   |
| C  | -0.20431605277257  | -1.45387223992322  | 3.39827395061606   |
| H  | -2.01111480508496  | 2.13024836032798   | -0.92152960308767  |
| C  | 1.81195256797697   | -2.8996207447020   | -4.51612144514302  |
| C  | 0.9834720506317    | -0.54013307379839  | 3.26527922001455   |
| C  | 1.22754754891239   | -1.33530319068458  | -3.20336840138958  |
| H  | 0.97279050177734   | -0.28456388758271  | -3.15952402210728  |
| C  | -1.43083143284037  | -0.66897906092015  | 3.90302694686406   |
| H  | -1.68639654274600  | 0.15557674955576   | 3.23830469213127   |
| H  | -1.217654527262608 | -0.24622600937939  | 4.88579591136913   |
| H  | -2.30890909932649  | -1.31480751827421  | 3.98228329151403   |
| C  | -2.61064088997888  | 1.98084305514711   | -2.14814488438475  |
| H  | -3.00771546968542  | 2.76537952907402   | -2.77343094176714  |
| C  | 2.24728099153130   | 1.08197140498310   | 2.47655223110492   |
| C  | 1.85588005797185   | -4.02930478437485  | -3.32065936834268  |
| H  | 2.10495527823760   | -5.08099725463128  | -3.32913452030871  |
| C  | -1.00016775230504  | -1.98360596259187  | -0.10260618488349  |
| C  | 0.33657441896928   | 4.72427253215683   | 0.37644885547568   |
| H  | -0.01690013750680  | 5.71615158911776   | 0.14050746572088   |
| C  | -0.84953037443556  | -3.34244648856674  | 0.27771938093909   |
| H  | -0.97286334671775  | -4.19420843352665  | -0.37476617718459  |
| C  | 1.61017106049938   | 4.38259927915814   | 0.88386434989725   |
| H  | 2.41731602944118   | 5.06541239353920   | 1.09859269606070   |
| C  | 0.97126426413311   | -1.44997592804064  | -0.729477          |

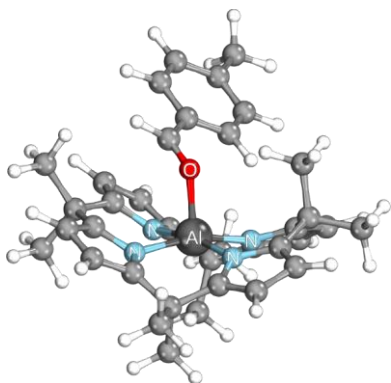

**[1]-*p*-methylbenzaldehyde sigma adduct isomer B**

|    |                   |                   |                   |
|----|-------------------|-------------------|-------------------|
| C  | 2.46504449505818  | 1.80043595090897  | 1.22553625933433  |
| C  | 1.49097096774833  | -3.11216321394826 | 3.27000405556012  |
| H  | 2.06000314892204  | -2.70603989860498 | 4.09701783848653  |
| C  | -3.37510378587784 | -1.19482784849725 | -0.04071576637815 |
| C  | -1.73470130038511 | 3.40719705278459  | -0.9866347900840  |
| C  | 0.02560852375039  | -4.10306692118750 | 1.14598656796384  |
| H  | -0.56900512112354 | -4.48379533869689 | 0.32346048358863  |
| C  | -3.38372215798335 | 0.29238480331263  | -2.11629508336725 |
| H  | -3.99464426727260 | -0.33383726350938 | -2.74964105920725 |
| C  | -3.50179681652874 | -2.44856387440596 | -0.91192429714964 |
| H  | -3.84999714566689 | -3.30278726925938 | -0.32908540129275 |
| C  | 2.32814593698437  | 1.06595715302857  | 3.68809918500597  |
| H  | 3.35462108924368  | 1.24896231948737  | 3.96397493505572  |
| C  | 1.31242311670311  | 0.56817677612411  | 4.53113398873147  |
| H  | 1.41161061476140  | 0.29711023757224  | 5.57083403575649  |
| H  | -2.56597242173227 | -2.71905449394169 | -1.38321565022127 |
| H  | -4.22590782236406 | -2.29189077074519 | -1.71160555112865 |
| C  | -1.10459836176166 | -0.68580564272392 | 5.53659480762192  |
| H  | -2.09083457232003 | -1.03654689979344 | 5.84487509387655  |
| H  | -0.73822589015874 | -0.01034080138802 | 6.31033505673254  |
| H  | -0.43401244915203 | -1.54445899296590 | 5.48889058510402  |
| C  | -4.79324906703615 | -0.84143849295036 | 0.47843790444470  |
| H  | -4.74712412744235 | 0.04079633323062  | 1.11627948083169  |
| C  | -1.94371790248676 | 4.32933815442938  | -2.18582305706020 |
| H  | -1.59287146034670 | 5.33771208145838  | -1.96328045538258 |
| H  | -3.00386147467442 | 4.39827214789662  | -2.43504763824443 |
| H  | -1.40585866973215 | 3.96829219578982  | -3.06249486871465 |
| H  | -5.21326050374758 | -1.66271679821490 | 1.06385101675414  |
| H  | -5.46156684410411 | -0.61990570784296 | -0.35566985028055 |
| C  | 3.65993263955950  | 2.65656207641870  | 1.66559769309232  |
| H  | 4.20682929201850  | 3.02735588277116  | 0.79819190359838  |
| H  | 4.36432593102470  | 2.06887567127701  | 2.25344896086447  |
| H  | 3.33963214636891  | 3.50926737365271  | 2.26288522413965  |
| C  | 3.04927361334175  | 0.63187095214050  | 0.40308878765666  |
| C  | 2.27685661631833  | -0.01753958609273 | 0.00360220836392  |
| H  | 3.71591331489022  | 0.02559649609878  | 1.02156782935172  |
| H  | 3.61910528135126  | 1.02166813395489  | -0.44315003897307 |
| N  | 0.42324554149430  | 0.94770399244371  | 2.49795838920393  |
| N  | -2.20961990245541 | 1.04712882387642  | -0.35314090028133 |
| N  | 0.22173244208718  | 2.34507941930188  | 0.17514379757806  |
| N  | -1.91669507490640 | -0.46266146961852 | 1.88205711089142  |
| C  | -0.27580150235910 | 3.321546299690586 | -0.64993875251406 |
| C  | -2.91419339690686 | -0.02085141803802 | -0.86239570160725 |
| C  | 0.31862980675086  | -2.73518075969858 | 1.20385506540923  |
| C  | -1.73477925232331 | -0.89786718205508 | 3.14944812880910  |
| C  | 1.54911096583304  | 2.64092462052253  | 0.38049154067401  |
| C  | -1.18772663895728 | 0.03085648024445  | 4.19134176202012  |
| C  | -2.28365999725111 | 2.04642625925448  | -1.28543006890398 |
| C  | 1.19820035614990  | -4.46557196752010 | 3.21982949240949  |
| C  | 0.16974036673082  | 0.50889648353175  | 3.77135135857537  |
| C  | 1.06004785598338  | -2.24445602670773 | 2.27537812912774  |
| H  | 1.33689108582191  | -1.20233807530732 | 2.32657832739170  |
| H  | -2.14603399576082 | 1.22917423504286  | 4.34657652761079  |
| H  | -2.23626724517220 | 1.79772627427948  | 3.42126720331079  |
| H  | -1.77444429863974 | 1.90818110972912  | 5.11620718776939  |
| H  | -3.14710452163855 | 0.89400806986076  | 4.62683657469024  |
| C  | -2.98744864049641 | 1.62114645399110  | -2.38435582249018 |
| H  | -3.20622705272301 | 2.19323718255338  | -3.27237161056929 |
| C  | 1.75530236795081  | 1.29556091916815  | 2.45707672576629  |
| C  | 0.45930633086384  | -4.9538362785465  | 2.13349240045414  |
| H  | 0.22261484086974  | -6.00991009550239 | 2.07899785690675  |
| C  | -2.54776742327032 | -1.47067113906751 | 1.18928225957074  |
| C  | 0.71562967882828  | 4.21094659853658  | -0.97848930076258 |
| H  | 0.61694440217580  | 5.0838731368487   | -1.60476113607892 |
| C  | -2.72973248323967 | -2.55541240003353 | 2.04158961222847  |
| H  | -3.21956797570181 | -3.48608575395262 | 1.795757871899431 |
| C  | 1.88489936407605  | 3.77327627601712  | -0.32124457749713 |
| H  | 2.85412829670597  | 4.24505608651829  | -0.35957341190065 |
| C  | -0.16461181570261 | -1.88280945983562 | 0.14126368120040  |
| H  | -0.64914163443157 | -2.39455203671755 | -0.69903823793913 |
| C  | -2.21357019469005 | -2.19523326556653 | 3.28796051023973  |
| H  | -2.17809091024633 | -2.80333169137739 | 4.17778392122893  |
| Al | -0.73433860148148 | 0.82429702964823  | 0.90799874160119  |
| O  | 0.07965416272003  | -0.67033771375298 | 0.02301723612282  |
| C  | -2.50189363373784 | 4.01119318853141  | 0.20895894653641  |
| H  | -2.12633472656717 | 5.01128235627352  | 0.43480293116661  |
| H  | -2.38828236536018 | 3.40740755162887  | 1.10996762006821  |
| H  | -3.57019831986230 | 4.07572195848768  | -0.01026350621145 |
| C  | 1.64069904060108  | -5.39742954579461 | 4.30789503369424  |
| H  | 2.14172571122985  | -6.27806912550412 | 3.90253559341022  |
| H  | 0.78710250076273  | -5.75214149234782 | 4.88933404749694  |
| H  | 2.32794392051935  | -4.91025677079672 | 4.99815988917219  |

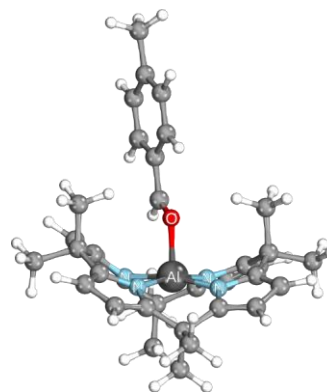

**[1]-*p*-methylbenzaldehyde sigma adduct isomer A**

|    |                   |                   |                   |
|----|-------------------|-------------------|-------------------|
| N  | -0.49157569367296 | -1.78690090909093 | 0.42600660118206  |
| C  | -1.4720543998767  | -2.5183805827530  | 1.04879003979750  |
| C  | -0.51928696102648 | -2.11820890153511 | -0.89852335236606 |
| C  | -2.15122795649269 | -3.26574123729247 | 0.10496846019634  |
| H  | -2.95544944008435 | -3.96083991407014 | 0.29758367406886  |
| C  | -1.53330049902037 | -3.01966482064094 | -1.14114286256673 |
| H  | -1.78220504704774 | -3.47293764501446 | -2.08837827603130 |
| N  | 0.13100955027453  | -0.81042673719925 | 2.84899902093994  |
| C  | 0.96101632229821  | -0.4100567588670  | 3.86253282973099  |
| C  | -0.60023791914071 | -1.87214456868507 | 3.32379529567522  |
| C  | 0.74762084121952  | -1.18548558577995 | 4.97565714441072  |
| C  | -0.25380541557128 | -2.1173863066238  | 4.63218725371793  |
| H  | -0.66774583672004 | -2.87782169811078 | 5.27683692921468  |
| N  | 0.77478563209033  | 1.64750931765908  | 1.73739787208236  |
| C  | 0.63678683848850  | 2.89660463016889  | 1.17968511034369  |
| C  | 1.51807532470479  | 1.79740833615296  | 2.87956383474517  |
| C  | 1.25586314713458  | 3.82543307429782  | 1.98213043326988  |
| H  | 1.31417466201566  | 4.88908562518264  | 1.81138020192718  |
| C  | 1.82335146538121  | 3.12231673247889  | 3.06672086542718  |
| H  | 2.40770336954409  | 3.54287722431630  | 3.87020581115910  |
| C  | -0.26648828025891 | -0.02737851790365 | -1.87303688758376 |
| C  | 0.02809372220399  | 2.01747744953156  | -1.0776584108978  |
| H  | -0.69833515741155 | -1.87982263509924 | -3.64171953282690 |
| C  | 0.29160295928003  | -2.10085605340028 | -3.24139046994044 |
| C  | 1.90655458968845  | -1.84175612714503 | -1.37809797557808 |
| C  | 0.47520357505115  | -1.51448546804306 | -1.84421566237755 |
| H  | 2.06637609010807  | -2.92168235953297 | -1.34362140618316 |
| H  | 0.42008920889476  | -3.18431567506393 | -3.22078687205678 |
| H  | 2.11325735141981  | -1.45115422976938 | -0.38166465773951 |
| H  | -3.14911322260975 | -1.03390512443002 | 2.89938011913475  |
| C  | -3.05756398789161 | -2.11476949650277 | 2.9765736183828   |
| C  | -1.57809346652956 | -4.10342330025980 | 2.91376739244526  |
| C  | -1.66068368698588 | -2.60775341041879 | 2.54662161187909  |
| H  | -0.61218032252088 | -4.51648988002118 | 2.62677015990358  |
| H  | -3.84566931605498 | -2.57025023516957 | 2.37346405758167  |
| H  | -2.35686776863122 | -0.6725407778433  | 2.40406663755943  |
| H  | 3.98620574423967  | 0.68384129655113  | 2.65781688042627  |
| C  | 3.18391005582757  | -0.0365579244579  | 2.83098350928430  |
| C  | 2.61417015410969  | 1.06260433833474  | 4.97863833632467  |
| C  | 2.03697872556451  | 0.61125860608301  | 3.63804399185781  |
| H  | 3.02999976645928  | 2.1495860824456   | 5.52477672820731  |
| H  | 2.84605438965854  | -0.38727989284350 | 1.85438962840365  |
| H  | 1.85095160404202  | 1.53067959459493  | 5.60031000565074  |
| C  | -0.10499797864656 | 3.16620571052491  | -0.10382117218273 |
| C  | -1.58377236010199 | 3.50578585013730  | 0.18782767438002  |
| C  | 0.49538728906641  | 4.41888392824594  | -0.76067050425078 |
| H  | -2.13994876981084 | 3.63756842935848  | -0.74323673190412 |
| H  | -0.04620133770290 | 4.67773686427966  | -1.67140062522983 |
| H  | -2.07695198648603 | 2.73738130897804  | 0.77451021043227  |
| H  | 1.54363506801167  | 4.26736939018552  | -0.10343758874496 |
| H  | -1.64413789683486 | 4.43255730034092  | 0.76279459795354  |
| H  | 0.42104627472809  | 5.27876771633876  | -0.09446465751808 |
| H  | 2.63500422030973  | -1.39954125678605 | -2.06027437081526 |
| H  | 1.03139741178095  | -1.69095087565951 | -3.93010339456221 |
| H  | -1.71095132301183 | -4.25580482952334 | 3.98559728366861  |
| H  | -3.23420580850286 | -2.37176610671970 | 4.02276318480241  |
| H  | 3.42235942637253  | 1.77939348036883  | 4.82812390230373  |
| H  | 3.58914139659464  | -0.89902619745839 | 3.36455224021076  |
| H  | 1.26067202423677  | -1.1180991065331  | 5.92177571196211  |
| Al | -0.04750990180642 | 0.0188066226608   | 1.11084152262136  |
| O  | -2.73414353515775 | -0.01348393793365 | 0.33878082533888  |
| O  | -1.96854613437610 | 0.45803875392987  | 1.17874634623776  |
| C  | 0.04851466521651  | 2.11564228498666  | -2.45104282684032 |
| H  | -0.02210247606175 | 3.0213170104217   | -3.03292026980353 |
| C  | 0.20442808342034  | 0.80898841735286  | -2.96025479101795 |
| H  | 0.27680067372118  | 0.52505218074997  | -3.99884313899763 |
| N  | 0.14872658900082  | 0.69535490642097  | -0.71565867816870 |
| H  | -2.35498991947054 | -0.57798904692266 | -0.52253096454727 |
| C  | -4.17021850950738 | 0.19861071617942  | 0.40162607035954  |
| C  | -6.94013551742742 | 0.54085885730156  | 0.45167239864073  |
| C  | -4.75515302317606 | 1.01878806313101  | 1.36637512645249  |
| C  | -9.79391815166805 | -0.44732329309802 | -0.53319696178331 |
| C  | -6.34622488443314 | -0.78808082276752 | -0.50578322114450 |
| C  | -6.12469962612149 | 1.18678422036657  | 1.38274875597098  |
| H  | -4.13083090454634 | 1.52136187099090  | 2.09340983837086  |
| H  | -5.15232363583694 | -1.09350514097895 | -1.27035613516338 |
| H  | -6.96529117531678 | -0.78429119357550 | -1.23537713853427 |
| H  | -6.57490375504033 | 1.82952714542539  | 2.12953656691231  |
| C  | -8.42972637907619 | 0.70309805923579  | 0.50490190597597  |
| H  | -8.71308417225275 | 1.70394925584707  | 0.82981992078212  |
| H  | -8.87025995066936 | -0.00360588166330 | 1.21145492676707  |
| H  | -8.8898628199779  | 0.52224748266337  | -0.46587399578027 |

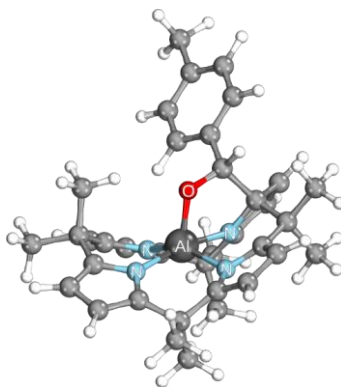

### [1]-*p*-methylbenzaldehyde 1,2 adduct isomer B

|    |                   |                   |                    |
|----|-------------------|-------------------|--------------------|
| Al | 2.05107714056777  | 8.03603821908846  | 12.55709166155091  |
| O  | 3.09318121886783  | 7.95256535160274  | 11.09965959816986  |
| N  | 3.73629420351848  | 7.43147264412106  | 13.48073250934443  |
| N  | 0.25621940997166  | 8.51893081892826  | 12.12525764889069  |
| N  | 2.54528998393558  | 9.82940077532522  | 13.15023357404573  |
| N  | 1.41830412270449  | 6.21799579168066  | 12.99685082566957  |
| C  | 1.71788567081662  | 10.90921900815570 | 13.02027441750385  |
| C  | -0.64268303280081 | 7.68695727140234  | 11.50997130916207  |
| C  | 4.90851206861915  | 6.42720303962190  | 10.74610791255481  |
| C  | 1.93325526330359  | 5.29369835676658  | 13.86771569749764  |
| C  | 3.83150265118347  | 10.28401637881957 | 12.96722659817300  |
| C  | 2.95340876012349  | 5.63733107716140  | 14.86968374010753  |
| C  | -0.37232185527876 | 9.71339914749430  | 12.34992398169423  |
| C  | 5.87022706819284  | 3.90497990019742  | 9.93128563697427   |
| C  | 4.06393222646010  | 6.40840093601065  | 14.17390260455584  |
| C  | 4.12651654728525  | 5.28764759126036  | 10.89393859646292  |
| H  | 3.13474989741386  | 5.35514167327810  | 11.32005986907690  |
| C  | 2.41292804638430  | 6.52824023807885  | 16.00379859953473  |
| H  | 1.97826848527794  | 7.44327284234330  | 15.60337709210856  |
| C  | 3.17894035132406  | 6.81124837779816  | 16.73088004340527  |
| H  | 1.62406749167065  | 5.98613752052300  | 16.52579230416743  |
| C  | -1.65313021274772 | 9.65614714225666  | 11.85349032880489  |
| H  | -2.39650958595932 | 10.43746418815545 | 11.89347849227297  |
| C  | 4.86705206150455  | 7.96227887161863  | 12.77378237429945  |
| C  | 6.64054065661158  | 5.051411886679057 | 9.76367291023914   |
| H  | 7.62249471260520  | 4.97683888565465  | 9.30865903771523   |
| C  | 4.05638705508501  | 5.58390653235204  | 12.25699952304834  |
| C  | 2.45678768957641  | 12.04073248331766 | 12.76582191571437  |
| H  | 2.07967750355647  | 13.04047039801253 | 12.61805795040320  |
| C  | 0.36744520058502  | 4.26518223687848  | 12.65126529802109  |
| H  | -0.29813031672735 | 3.515800333803429 | 12.72534714591408  |
| C  | 3.80964255555711  | 11.63834120880901 | 12.55782696553905  |
| H  | 4.66122768540367  | 12.28057881872091 | 11.23941262148842  |
| C  | 4.43880366029333  | 7.78344974365779  | 10.67118683703745  |
| H  | 4.99599555157162  | 8.54461863055376  | 13.68270334695756  |
| C  | 1.31267267932194  | 4.07962041958632  | 3.16089625230364   |
| H  | 1.49898121965119  | 4.22666442705364  | 10.5008607381937   |
| C  | 4.60936447903618  | 4.04860323667631  | 10.64190492774604  |
| H  | 3.98092581887293  | 3.1765055208016   | 11.13809932987630  |
| C  | -0.30130543193422 | 6.26614913235760  | 13.22448643918018  |
| C  | 0.23465226241052  | 10.78056979067698 | 10.16279487287516  |
| C  | 6.16339265625139  | 6.28986180602139  | 10.01708029991749  |
| H  | 6.78140340124272  | 7.17053558360720  | 11.31449129111937  |
| C  | -1.82529092164415 | 8.36051721582963  | 10.85068887937901  |
| H  | -2.71963265314424 | 7.97432996030412  | 13.21762869037588  |
| C  | 5.98219816131700  | 7.07322904659791  | 12.89600643886894  |
| H  | 7.00885252776494  | 7.16285412873757  | 10.6394538385703   |
| C  | 5.49734246827569  | 6.1548890592272   | 10.87555520477366  |
| H  | 6.03597221646662  | 5.35006646547003  | 11.76036822233581  |
| C  | -1.59725483602378 | 5.49392662325053  | 10.57097798629986  |
| H  | -2.23265764492400 | 4.46894274096228  | 10.06274875097001  |
| H  | -1.38139451234959 | 5.95682783116908  | 13.20366736616015  |
| C  | 5.07016008593243  | 9.45188882857992  | 14.70013656280481  |
| O  | -0.02887909994321 | 10.40897330623952 | 14.95026431048428  |
| H  | 0.41399296493133  | 9.44457917416626  | 14.88931654958447  |
| H  | -1.10170434862734 | 10.33689267152323 | 15.371084415133361 |
| C  | 0.39980025321026  | 11.15744704693662 | 9.83098910505540   |
| C  | 0.51852364947188  | 6.22776168062140  | 9.01920604479014   |
| H  | -0.06027633562348 | 6.67392478553911  | 5.1952503200946    |
| H  | 0.75496617422627  | 5.1952503200946   | 9.90794017192270   |
| H  | 1.45438690510396  | 6.77574939876526  | 15.52005812050506  |
| C  | 3.57039571002897  | 4.37304232001660  | 16.04544484730464  |
| H  | 2.78986754272583  | 3.82375211764479  | 16.25029607113555  |
| H  | 4.346848497388542 | 4.61764234017592  | 14.76867902472092  |
| C  | 3.99840391706720  | 3.70884122169073  | 12.94970849962689  |
| C  | -0.44306574934320 | 12.12198595661740 | 13.59874481273131  |
| H  | -0.03742978613154 | 12.8992973344751  | 13.14538751764114  |
| H  | -1.51309559543270 | 12.05992906502297 | 11.913196299305673 |
| C  | -0.30505924086777 | 12.42931959632596 | 14.70882560630263  |
| C  | 5.39623393208539  | 9.50934678520059  | 15.00759184061423  |
| H  | 5.48846450084643  | 10.55344781378818 | 14.95567644062089  |
| H  | 6.33141727831381  | 9.00078022762603  | 15.30943883088892  |
| C  | 4.59809145063470  | 9.07457197348333  | 9.47213817258143   |
| C  | 6.36798551422973  | 2.56421338567844  | 8.40969679854556   |
| H  | 6.16759537185926  | 2.40719471326764  | 10.01404966517240  |
| H  | 5.88393632475360  | 1.75162524341227  | 9.61505461230264   |
| H  | 7.44459015211525  | 2.46194954307552  | 12.44927682653451  |
| C  | 6.26191385199209  | 10.04860570649702 | 11.38187266622159  |
| H  | 6.07071289223508  | 10.14582769108118 | 12.58703698512748  |
| H  | 7.16511663449456  | 9.45048080945055  | 12.82929050335715  |
| H  | 6.48352872676598  | 11.04556952134826 |                    |

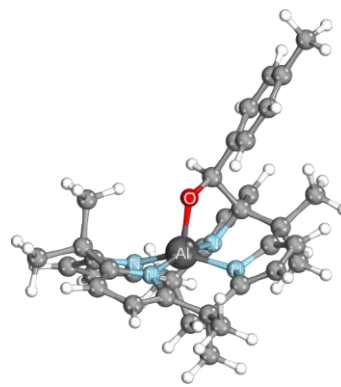

### [1]-*p*-methylbenzaldehyde 1,2 adduct isomer A

|    |                   |                   |                   |
|----|-------------------|-------------------|-------------------|
| N  | -0.05427955098993 | -2.32109936282062 | 0.41245545096832  |
| C  | -0.25879245645221 | -3.50647676357867 | 1.06526326116478  |
| C  | 0.37942877013645  | -2.62922938681786 | -0.85110527108938 |
| C  | 0.04651715312572  | -4.55625043216106 | 0.22631040643966  |
| H  | -0.02048205096487 | -5.60773593369748 | 0.45664598614196  |
| C  | 0.45558390553266  | -3.99445714000823 | -1.00141711702022 |
| H  | 0.77136868739301  | -4.53370634880970 | -1.88169912673171 |
| N  | 0.04357392272648  | -1.25763924099242 | 2.93176705556574  |
| C  | 0.65576705253985  | -0.59142131333197 | 3.95866642101120  |
| C  | -0.19236941289181 | -2.54079580144450 | 3.35387426052938  |
| C  | 0.78372696012673  | -1.43265044627001 | 5.03795478584853  |
| C  | 0.23908735253026  | -2.67923432317192 | 4.65160522124959  |
| H  | 0.18767854151341  | -3.57050760536608 | 5.25790312483171  |
| N  | 0.04273559677763  | 1.27194004982111  | 1.64421157514930  |
| C  | -0.67654003196765 | 2.31436353232643  | 1.10028180454555  |
| C  | 0.40187262395346  | 1.6556816998532   | 2.90654821467584  |
| C  | -0.77037250536233 | 3.33718114253375  | 2.01403115040884  |
| H  | -1.26420378978638 | 4.28633059505275  | 1.87136025648777  |
| C  | -0.07544954587888 | 2.91804779018457  | 3.17081953839073  |
| H  | 0.05518194528173  | 3.48139718418681  | 4.08151301560095  |
| C  | -0.27731267097244 | -0.50291102666131 | -1.81927521745567 |
| H  | -1.63732776162322 | 0.98510091801584  | -0.83684589716562 |
| H  | -0.07406604014160 | -2.64633216137227 | -3.56863908296036 |
| C  | 0.86323831080546  | -2.17920757660762 | -3.26547723162064 |
| C  | 2.12608468203849  | -0.94610782387915 | -1.50552273326004 |
| C  | 0.76754570386990  | -1.57822081426757 | -1.86575795182670 |
| H  | 2.89744949940032  | -1.71635030257279 | -1.52359682965499 |
| H  | 1.63921161462787  | -2.94312008545207 | -3.29583744722555 |
| H  | 2.11457466991715  | -0.5111499497649  | -0.50667526753924 |
| H  | -2.65442180233954 | -2.42357980536852 | 2.02936675317748  |
| C  | -2.36151545941295 | -3.39517458283866 | 2.41993271098806  |
| C  | 0.55970128856464  | -4.96772882642805 | 3.04368329341093  |
| C  | -0.82944572345980 | -3.57722274668091 | 2.46333170460036  |
| H  | 0.50804865931446  | -5.17903372574461 | 3.09795070891498  |
| H  | -2.81418768874052 | -4.16312016233488 | 1.78779768734313  |
| H  | -1.03501331111795 | -5.73832140483111 | 2.43517454416364  |
| H  | 3.11135350497920  | 1.5847167353658   | 2.93455593631091  |
| C  | 2.63863998175370  | 0.61192517326134  | 3.09080566654578  |
| C  | 1.48253560212000  | 1.43758528140963  | 5.12722666079731  |
| C  | 1.26113705369895  | 0.77495325730797  | 3.76865856792869  |
| H  | 2.15020459997508  | 0.83639622359323  | 5.74490425552001  |
| H  | 2.54702917198233  | 0.12588057182453  | 2.11934993689898  |
| H  | 0.54277803396525  | 1.56065851717708  | 5.66528539724901  |
| C  | -1.09483736246618 | 2.37111335069564  | -0.34729940750573 |
| C  | -2.10524143457505 | 3.49834359327860  | -0.58443666561860 |
| C  | 0.15880553537320  | 2.73541030921192  | -1.17360341292772 |
| H  | -2.42958061728152 | 3.526492257171958 | -1.62617184997261 |
| H  | -0.05368449858804 | 2.81827891937877  | -2.24270287357448 |
| H  | -2.98777534112609 | 3.43075812242992  | 0.04359785589674  |
| H  | 0.96692357567766  | 2.02023440006375  | -1.03233369378926 |
| H  | -1.62774726611599 | 4.45696914656169  | -0.7822342717166  |
| H  | 0.52665126191993  | 3.70175520431828  | -0.82830074391685 |
| H  | 2.40418266045592  | -0.15856939262686 | -2.21135531893718 |
| H  | 1.12867475475589  | -1.41744669767891 | -4.00169088148117 |
| H  | -0.97822517729752 | -5.04941385328138 | 4.04742500569159  |
| H  | -2.77425581685134 | -3.48654587734074 | 3.42721215368820  |
| H  | 1.94362796447068  | 2.41933790330077  | 5.00654836466252  |
| H  | 3.29508685178764  | -0.00511095925176 | 3.70739385154911  |
| H  | 1.23816749062999  | -1.19883470446074 | 5.98844246806112  |
| Al | -0.47448534494730 | -0.57337320172766 | 1.22794156946453  |
| C  | -2.77711300490675 | 0.24771863701845  | 0.02717732399369  |
| O  | -2.24475705659541 | -0.28362967387168 | 1.16263678895934  |
| C  | -1.93345226716095 | 0.94075398305479  | -2.29684769152748 |
| H  | -2.68960546333356 | 1.5358990762049   | -2.78774144249704 |
| H  | -1.11878522038744 | 0.6746267146058   | -2.87890185851653 |
| H  | -1.09209308102503 | -0.23979649709690 | -3.91897284035626 |
| N  | -0.56141802108575 | 0.04202142021855  | -0.69869884544410 |
| H  | -3.12826829171594 | -0.54533550429843 | -0.65955641630296 |
| C  | -3.96441206169042 | 1.13239278796265  | -0.31935875199020 |
| C  | -6.14480129497741 | 2.83484449303083  | 0.84102342698743  |
| C  | -4.12541900182100 | 1.71083218426845  | 1.57336432484650  |
| C  | -4.92049292462987 | 1.38879114711058  | -0.65507891239756 |
| C  | -5.99072927340533 | 2.23367224082142  | -0.40360962208335 |
| C  | -5.19749494645410 | 2.55319938599610  | 1.82162382335521  |
| H  | -3.39112739855066 | 1.15104568971967  | 2.34243548925611  |
| H  | -4.83067923179993 | 0.9200568985788   | -1.6296325252310  |
| H  | -6.71935186016960 | 2.4229100803670   | -1.18440048421142 |
| H  | -5.29581159037188 | 3.00606868065112  | 2.80201203677027  |
| H  | -7.31814852011079 | 3.72636175403734  | 1.13172085384417  |
| H  | -7.06329048335141 | 4.50003321467747  | 1.85646802675219  |
| H  | -8.15541316671646 | 3.1598740006123   | 1.5466573307      |

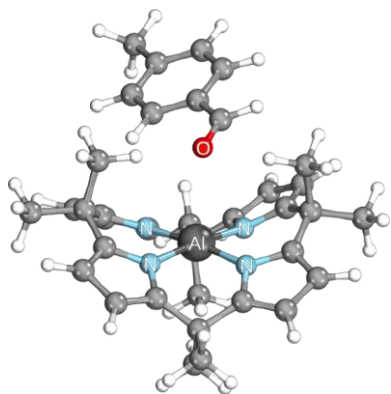

**[1]-*p*-methylbenzaldehyde TS 1 isomer**  
B/A

|    |                   |                   |                   |
|----|-------------------|-------------------|-------------------|
| C  | 2.49075698050897  | 2.36553454859637  | 0.85601602268032  |
| C  | -2.75127396231476 | 2.76963938364812  | 2.50567853009003  |
| C  | 1.15969964966322  | -0.08985697209802 | -1.98687847457631 |
| H  | 0.24719051753227  | -4.67212887539690 | -2.03362758543008 |
| C  | -2.65376582730477 | -0.2706569502273  | -1.98296548516708 |
| C  | -2.36214064897048 | 3.54491873013078  | 1.22678112361177  |
| C  | 3.4659706032658   | -2.57953033667538 | -1.81621144061504 |
| H  | 4.36778086804327  | -1.98477974560907 | -1.72580477926167 |
| H  | -2.28325648116374 | 1.78379522724883  | 2.54508077337064  |
| C  | -4.07673521589840 | 1.83917255987060  | -1.56833550382773 |
| H  | -4.86699774865662 | 1.65542816363225  | -2.27906659517239 |
| H  | -3.83133439529884 | 2.61548306162201  | 2.54829769674418  |
| H  | -2.43276492986329 | 3.31486576360107  | 3.39645546409304  |
| C  | -1.68800386280712 | -0.0266822322267  | -3.16035604345014 |
| H  | -2.17797190604746 | 0.59283468258662  | -3.91455745842283 |
| C  | 3.26536486983511  | -0.04419216259001 | 1.33831553151422  |
| H  | 4.3303017007132   | 0.13345843984948  | 1.35232424684639  |
| C  | 2.61724972945163  | -1.27422871124993 | 1.60790335770459  |
| C  | 3.09158174444438  | -2.21197485240860 | 1.85125764629791  |
| H  | -1.39528114759598 | -0.97166531120216 | -3.62481639944443 |
| H  | -0.78327140708492 | 0.48718991794589  | -2.85271946733740 |
| C  | 0.64031170128938  | -3.34718149855378 | 2.14324034503051  |
| H  | -0.18013215953620 | -4.01489056358226 | 2.40802544598466  |
| C  | 1.33500400398891  | -3.33123898079942 | 2.98442123180879  |
| H  | 1.15451582732410  | -3.7655241977060  | 1.27712631288962  |
| C  | -3.92505294235301 | -0.88531804684356 | -2.57698197656967 |
| H  | -4.66926069818494 | -1.08577137813053 | -1.80707275691976 |
| C  | -3.06490019734892 | 4.90029889853812  | 1.27705392383482  |
| H  | -2.76432983728939 | 5.45827718761945  | 2.16452282990833  |
| H  | -4.14682271861018 | 4.77226904453133  | 1.32738171397850  |
| H  | -2.8293254419172  | 5.499779547438171 | 0.39799224758106  |
| C  | -3.69647681158003 | -1.82040714239957 | -3.09050958336634 |
| H  | -4.36556539809092 | -0.21636969374749 | -3.31677564077696 |
| C  | 3.62767798242446  | 2.85535865609914  | 1.76579044821037  |
| H  | 3.83527927649558  | 3.91300880513372  | 1.59778652727619  |
| H  | 4.55091032499414  | 2.31318681091273  | 1.55888092192080  |
| C  | 3.37732726543305  | 2.71451612978040  | 2.81625105366153  |
| C  | 2.47371461540609  | -6.22780554584599 | -2.07687654866456 |
| H  | 3.49416427313578  | -6.57328772515164 | -2.24027296793419 |
| H  | 1.85531542871314  | -6.61891453213248 | -2.88583401490903 |
| H  | 2.11633998681132  | -6.68329388856062 | -1.15127672374750 |
| C  | 2.93087231045844  | 2.63622740403965  | -0.59801226025560 |
| H  | 2.15271333551206  | 2.37605654162426  | -1.31153526242435 |
| H  | 3.83357263344509  | 2.07015150458671  | -0.84451606153521 |
| H  | 3.1516663349091   | 3.69786614838683  | -0.72390451341731 |
| Al | -0.53371229586376 | 0.93702816884442  | 0.34134599946069  |
| O  | 1.15570064754959  | 0.16215782298351  | 1.63043718754813  |
| N  | 1.0533483037490   | 0.28440091668019  | 1.21157088001589  |
| N  | -2.20077007214160 | 1.60678437264121  | -0.35476303575869 |
| N  | -0.01965342535349 | 2.71130916809539  | 0.88936171502429  |
| N  | -1.17349669688801 | -0.85420111773995 | -0.00359451964191 |
| C  | -0.87661459166856 | 3.73845337992246  | 1.20437534857112  |
| C  | -2.99506465240538 | 1.03340845546540  | -1.32152653825771 |
| C  | 2.22627071561376  | -1.95036617647705 | -1.79986401454732 |
| C  | -0.83974906740674 | -1.98452628664057 | 0.69691223605592  |
| C  | 1.25362638283451  | 3.16417865420581  | 1.14745028772698  |
| C  | 0.12020713664308  | -1.94107129388833 | 1.85108889205601  |
| C  | -2.82418114415320 | 2.77062134037469  | 0.03011044156901  |
| C  | 2.39727141076092  | -4.73117409479141 | -2.00166461144111 |
| C  | 1.27053125438861  | -1.03120832368675 | 1.53149138423006  |
| C  | 1.06613434987111  | -2.71519693852475 | -1.88902171904268 |
| H  | 0.09404298419120  | -2.24070135340886 | -1.87256528487358 |
| C  | -0.60287136925491 | -1.42988655842985 | 3.11397895428185  |
| H  | -1.00928525913035 | -4.02656836231222 | 2.97700617162970  |
| H  | 0.08445184449988  | -1.38713837935077 | 3.96136585887195  |
| H  | -1.43688040128101 | -2.08731971681359 | 3.36714403476890  |
| C  | -3.97047504441615 | 2.94853625378234  | -0.69918261303505 |
| C  | -3.74722834114107 | 3.76150292808020  | -0.60562246446896 |
| C  | 2.28222886795027  | 0.89413310022902  | 1.12523158491741  |
| C  | 3.55180045722570  | -3.95651023424334 | -1.91895272693945 |
| H  | 4.52235793744959  | -4.4382751982359  | -1.92401945946650 |
| C  | -2.07709871106576 | -1.22760789360507 | -0.97112298170001 |
| C  | -0.16280951803901 | 4.82626423368329  | 1.63587981415168  |
| H  | -0.56541427392995 | 5.77147045638086  | 1.96457022135043  |
| C  | -2.31542715446119 | -2.57986496269866 | -0.8719725248986  |
| C  | -2.98236816361423 | -3.16098314677826 | -1.48942737812185 |
| C  | 1.20011110663760  | 4.46041687699633  | 1.59484239741696  |
| C  | 2.03834534765478  | 5.08552680783793  | 1.85992344050142  |
| C  | 2.17356514200954  | -0.49158638761388 | -1.66737896989665 |
| C  | 3.15681625801324  | 0.00556972619954  | -1.61363656666705 |
| C  | -1.53146473765913 | -3.06165707607672 | 0.19999011185554  |
| H  | -1.47686233921932 | -4.07987009942765 | 0.55243769744803  |

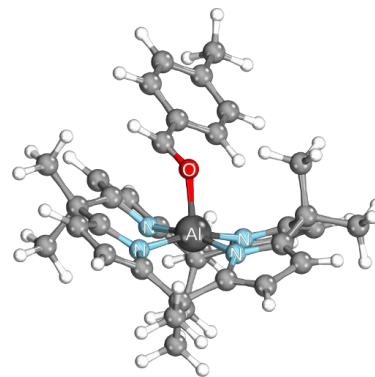

**[1]-*p*-methylbenzaldehyde TS 2 isomer**  
B

|    |                   |                   |                    |
|----|-------------------|-------------------|--------------------|
| C  | 2.45417427527804  | 1.81886437940398  | 1.26738956656421   |
| C  | 1.49842080339555  | -3.15397772396313 | 3.23948979075134   |
| H  | 2.07817334932513  | -2.75221482931321 | 4.06159882476064   |
| C  | -3.33155478084609 | -1.21174078899151 | -0.03249612987921  |
| C  | -1.71742449217581 | 3.40094942651808  | -1.009556509511285 |
| C  | 0.00870437404701  | -4.12753447255732 | 1.12944312838299   |
| H  | -0.59236275245308 | -4.50692274002845 | 0.31036053752780   |
| C  | -3.36607671662361 | 0.27390009666614  | -2.11300284401889  |
| H  | -3.96667100620788 | -0.36112727217411 | -2.74726696082025  |
| C  | -3.51609658032958 | -2.44955967514919 | -0.91475696686887  |
| H  | -3.83163954476992 | -3.31316424175081 | -0.32672749741546  |
| C  | 2.26935454911703  | 1.13139380445372  | 3.74407613504542   |
| H  | 3.28777746517177  | 1.32638402245915  | 4.04068115724656   |
| C  | 1.24003034472063  | 0.63197293555026  | 4.56967804294963   |
| H  | 1.31928887454783  | 0.37418626830283  | 5.61449575004067   |
| H  | -2.60616866600829 | -2.71468581077547 | -1.45284536578942  |
| H  | -4.29016332681439 | -2.27501556881921 | -1.66194115445642  |
| C  | -1.1900069068490  | -0.62736489588080 | 5.54280157925660   |
| H  | -2.17891256277521 | -0.98518730502829 | 5.83472880638402   |
| H  | -0.85032126878329 | 0.06458771103635  | 6.31376982944952   |
| H  | -0.50710888651463 | -1.47730859047395 | 5.52482190130102   |
| C  | -4.71584220621233 | -0.85279491524180 | 0.56600446228271   |
| H  | -4.62845557446057 | 0.01416322350880  | 1.22030879505939   |
| C  | -1.91962587574969 | 4.30782595536303  | -2.22171068166125  |
| H  | -1.56450233081840 | 5.31735424961914  | -2.01174587758394  |
| H  | -2.97875746863107 | 4.37863601895165  | -2.47481500896941  |
| H  | -1.38096684403568 | 3.93260650320736  | -3.09188971913682  |
| H  | -5.12218818752508 | -1.68195504673075 | 1.15030954986247   |
| H  | -5.41862839462201 | -0.60217297708335 | -0.23027790340594  |
| C  | 3.64869637518512  | 2.67323917265369  | 1.70956652008285   |
| H  | 4.209505577755023 | 3.02534885978710  | 0.84318173160339   |
| H  | 4.34043994361542  | 2.08813477410987  | 2.31672858515835   |
| C  | 3.32721297270123  | 3.53849214619200  | 2.28812363849263   |
| C  | 3.03729770836367  | 0.62978758985311  | 0.47413543842227   |
| H  | 2.26477945098273  | -0.02754161940073 | 0.08703583395485   |
| H  | 3.69847693159791  | 0.03603010931449  | 1.11031108045722   |
| H  | 3.61349748265015  | 0.99854526345489  | -0.37729236562234  |
| N  | 0.39487789810318  | 0.97669186309762  | 2.51234338394940   |
| N  | -2.20262745749104 | 1.04775375443702  | -0.35079786001305  |
| N  | 0.234789327779571 | 2.34873777782533  | 0.16857530466384   |
| N  | -1.89109189848551 | -0.47359790453729 | 1.87797871811337   |
| C  | -0.25838154118320 | 3.31802400157165  | -0.6664060820596   |
| C  | -2.89595520715131 | -0.02936377940836 | -0.85699457059173  |
| C  | 0.25152558178061  | -2.75236807186141 | 1.21984876453267   |
| C  | -1.76335228795323 | -0.87751123886447 | 3.14286931000647   |
| C  | 1.55554802607846  | 2.65254630666450  | 0.39601207461883   |
| C  | -1.24834927039861 | 0.06894168165486  | 4.18572076022435   |
| C  | -2.2746439986506  | 2.03886032557480  | -1.29156316496073  |
| C  | 1.25650099698606  | -4.51498281290858 | 3.15676569817914   |
| C  | 0.11569762039449  | 0.55099744573189  | 3.78463726533875   |
| C  | 1.00989417735200  | -2.27226648727845 | 2.2817798182476    |
| H  | 1.25072805083863  | -1.22277383952363 | 2.36041395251510   |
| C  | -2.22296659402567 | 1.25891045364612  | 4.29548882109144   |
| H  | -2.29418721130589 | 1.81032656559338  | 3.5835110835398    |
| H  | -1.87518320648825 | 1.95328701562264  | 5.06201101509739   |
| H  | -3.22806981973748 | 0.92093982878645  | 4.55831893219330   |
| C  | -2.97478602179878 | 1.60265052077973  | -2.3889752357949   |
| H  | -3.19132747458430 | 2.16602401612272  | -3.28305167428976  |
| C  | 1.72287660215122  | 1.33715890351871  | 2.49691829996137   |
| C  | 0.50475424829806  | -4.99295373704680 | 2.07513456882177   |
| H  | 0.30975469452215  | -0.0558384210962  | 1.98749113130698   |
| C  | -2.43651122633277 | -1.51595591830163 | 1.14936294480069   |
| C  | 0.73331832808792  | 4.21242499738879  | -0.98236932931035  |
| H  | 0.63928094259261  | 5.08364379553586  | -1.61186937470289  |
| C  | -2.65737741608501 | -2.58931653148224 | 2.03159201414938   |
| H  | -3.09813666398640 | -3.54141028933717 | 1.77549530111791   |
| C  | 1.89543770800305  | 3.78450599697815  | -0.30477862416532  |
| H  | 2.86196705363440  | 4.26284809637166  | -0.32892341585993  |
| C  | -0.3001072890371  | -1.87165285297056 | 0.20078223850108   |
| H  | -0.77615239302489 | -2.37135181308179 | -0.64934818136099  |
| C  | 2.2240608896510   | -2.19793193709095 | 3.2839088280778    |
| H  | -2.20426614281823 | -2.79149765433254 | 4.1837346160532    |
| Al | -0.70926475451859 | 0.88831015200119  | 0.55201163706209   |
| O  | 0.6057191094473   | -0.6726898318601  | 0.0529808886865    |
| C  | -2.4839069999653  | 0.02409611777589  | 0.17660035483970   |
| H  | -2.10477894127235 | 5.02566334947529  | 0.38940247566143   |
| H  | -2.37225843953642 | 3.43173590597284  | 1.0853538160336    |
| H  | -3.55182430517536 | 4.0897092886199   | -0.04455750123909  |
| C  | 1.77408446206766  | -5.46589387582059 | 4.19517013005121   |
| H  | 2.36337831695348  | -6.26763889329780 | 3.746277701163230  |
| H  | 0.9554563025445   | -9.5374679498209  | 4.74827725086702   |
| H  | 2.45080330206473  | -4.9579637329961  | 4.9227709596288    |

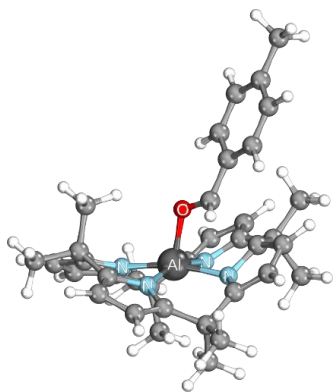**[1]-p-methylbenzaldehyde TS 2 isomer****A**

|    |                   |                    |                   |
|----|-------------------|--------------------|-------------------|
| N  | -0.69667751703837 | -1.53484396052680  | 0.13436557343148  |
| C  | -1.89805823304338 | -2.01875218198553  | 0.64700792488105  |
| C  | -0.60172379603690 | -1.86176791186096  | -1.13061084303403 |
| C  | -2.52180637798250 | -2.77150319975878  | -0.37587662961839 |
| H  | -3.45209172178986 | -3.31166265702102  | -0.28053273499021 |
| C  | -1.72433853078589 | -2.69073969272250  | -1.49912345879893 |
| H  | -1.91952128820383 | -3.11084557445389  | -2.47325578200498 |
| N  | -0.15758461724900 | -0.65557334488821  | 2.64332733081696  |
| C  | 0.37191365701158  | -0.12645071082189  | 3.78821882258150  |
| C  | -1.23661868668549 | -1.42539149813195  | 3.02098924666977  |
| C  | -0.36063792633767 | -0.52772242744643  | 4.87810354983519  |
| C  | -1.39690792427722 | -1.35323898452646  | 4.38449647080497  |
| H  | -2.14081445736115 | -1.86807415935906  | 4.97384432261975  |
| N  | 0.82645909217386  | 1.77076303658572   | 1.61916856786958  |
| C  | 0.96095949888303  | 2.98401260636771   | 0.98857346388107  |
| C  | 1.45941787615394  | 1.87440492463298   | 2.83068212674893  |
| C  | 1.65592710513353  | 3.84768322776581   | 1.80037752227060  |
| H  | 1.91384821514411  | 4.87206766006462   | 1.58155228407456  |
| C  | 1.97767722868660  | 3.13665343395179   | 2.97803439227201  |
| H  | 2.53560552686967  | 3.50997499318528   | 3.82283244610721  |
| C  | 0.59173979705115  | 0.0102346668451    | -2.01048786097598 |
| C  | 0.55092512397632  | 2.09289686989102   | -1.29357409945410 |
| H  | -0.39276782059988 | -1.72392342833873  | -3.88935305947646 |
| C  | 0.48727163520606  | -2.08446536956846  | -3.35618782850611 |
| C  | 1.86529162692268  | -2.01725366371071  | -1.29024700424960 |
| C  | 0.57616891451670  | -1.49251059939165  | -1.95191034371322 |
| H  | 1.85809019208043  | -3.10781016498335  | -1.22050715482649 |
| H  | 0.44501162917904  | -3.17456200866495  | -3.31387507640851 |
| H  | 1.99533901439372  | -1.62355830719974  | -0.28259457718608 |
| H  | -3.96272070090610 | -1.84010832821861  | 2.62565012330665  |
| C  | -3.33428317507464 | -2.72554851113896  | 2.58868379370514  |
| C  | -1.09811852902298 | -3.73061052730302  | 2.19512829575289  |
| C  | -1.91499943049327 | -2.41698474520202  | 2.11035926973891  |
| H  | -0.07423348842731 | -3.56736408542364  | 1.86084889177495  |
| H  | -3.81733307601276 | -3.45918845947043  | 1.9407460420129   |
| H  | -1.54163957723641 | -5.415431963938665 | 1.57510239082702  |
| H  | 3.71367971431692  | 0.37691437477893   | 3.18377394595913  |
| C  | 2.78281121342713  | -0.19296285992199  | 3.21408811261143  |
| C  | 2.00295299452342  | 1.15702057364401   | 5.14339439166146  |
| C  | 1.62989008641371  | 0.68906783413027   | 3.73830975653202  |
| H  | 2.13388832628361  | 0.30277381318615   | 5.80975428963700  |
| H  | 2.58706901269776  | -0.55470926271280  | 2.20414489507816  |
| H  | 1.23401325132645  | 1.80647534387489   | 5.56184175908744  |
| C  | 0.37500223642692  | 3.271591340040958  | -0.36821258494111 |
| C  | -1.11506194534085 | 3.65596965922135   | -0.24798354677959 |
| C  | 1.09049447806934  | 4.48521496981799   | -0.97162321874995 |
| H  | -1.53062304761456 | 3.87211011228867   | -1.23517272601186 |
| H  | 0.66330392905975  | 4.74240687435019   | -1.94169112119543 |
| H  | -1.71133700947507 | 2.86942864978964   | 0.20247935871207  |
| H  | 2.15571393274713  | 4.29683609544251   | -1.10128549115395 |
| H  | -1.22031321698305 | 4.54601885292607   | 0.37643236826293  |
| H  | 0.96965839075048  | 5.35862949916236   | -0.3300006720700  |
| H  | 2.73138089288863  | -1.71005486539895  | -1.87805178850818 |
| H  | 1.36625501006705  | -1.81231534043440  | -3.94050978582762 |
| H  | -1.06062869595554 | -4.07947739004744  | 3.22852757377123  |
| H  | -3.30921057678216 | -3.15737077364657  | 3.58936872127894  |
| H  | 2.94303948612285  | 1.70974899786726   | 5.12911685928033  |
| H  | 2.92361752281066  | -1.06642103494122  | 3.85508667278240  |
| H  | -0.17705147620418 | -0.27157396522122  | 5.90992746358985  |
| Al | -0.12169138525476 | 0.25154838095915   | 0.91807754674762  |
| C  | -2.74825270627874 | -0.02953339286015  | 0.30236104792462  |
| O  | -1.94176216486911 | 0.69649746790083   | 0.96557542837783  |
| C  | 0.83233942640965  | 2.13600481745954   | -2.63999326836576 |
| H  | 1.00326904794283  | 3.01938807854871   | -3.23460337432002 |
| C  | 0.85976736396041  | 0.80256220373728   | -3.09920456509521 |
| H  | 1.06292692871164  | 0.471102993926457  | -4.10597036987225 |
| N  | 0.39566638434073  | 0.78659292843279   | -0.89689445413397 |
| H  | -2.55852510861492 | -0.22434732135369  | -0.76141152109043 |
| C  | -4.16328869890385 | -0.03022494545210  | 0.70727296624521  |
| C  | -6.86695437124055 | -0.00475151771615  | 1.45112390791059  |
| C  | -4.55761186323527 | 0.55338903045225   | 1.90991573925674  |
| C  | -5.13052410533787 | -0.58704987008465  | -0.12169010930072 |
| C  | -6.46456992048701 | -0.57363678015295  | 0.24565619454463  |
| C  | -5.89249084531391 | 0.56029511314603   | 2.27145233370948  |
| H  | -3.80820363623734 | 0.98396358180112   | 2.56083462396986  |
| H  | -4.82813387749243 | -1.04171573010367  | -1.05786647210010 |
| H  | -7.20509456918690 | -0.10140717747306  | -0.41264524927709 |
| H  | -6.18439177703367 | 1.01271886047123   | 3.21226850060800  |
| C  | -8.30769092436853 | -0.01384985678843  | 1.87100704459638  |
| H  | -8.61682671679863 | 0.95627559521549   | 2.26189764215141  |
| H  | -8.48358444634568 | -0.74893759136928  | 2.65919932330365  |
| H  | -8.96766580257727 | -0.26225427215523  | 1.04021494717503  |

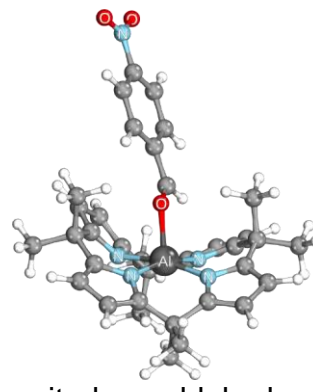**[1]-p-nitrobenzaldehyde sigma adduct A**

|    |                    |                   |                   |
|----|--------------------|-------------------|-------------------|
| C  | 2.60825345550881   | 2.10468828782932  | 0.88175673065372  |
| C  | -2.49973982632870  | 3.32395835938359  | 2.21387875902023  |
| C  | 1.62258510209993   | -2.94109616738748 | -4.0037063776098  |
| H  | 1.21140673384503   | -2.94484157148258 | -5.00206876105362 |
| C  | -2.78619748136487  | -0.75806352499564 | -1.43949171089778 |
| C  | -2.12593636920451  | 3.69293611478179  | 0.76004736042816  |
| C  | 2.69217029261754   | -2.95724198721818 | -1.43817607496351 |
| H  | 3.09264691884522   | -2.95645175116161 | -0.43173097713520 |
| H  | -2.09420497486668  | 2.35269734126955  | 2.50342908042528  |
| C  | -4.10414285927819  | 1.43315754424834  | -1.38637370627699 |
| H  | -4.94476590865956  | 1.12190164785754  | -1.98761756293370 |
| C  | -3.58432325403915  | 3.27190078332695  | 2.32941625134345  |
| H  | -2.10148095030141  | 4.06291865821285  | 2.91215592653739  |
| C  | -2.25912044364894  | -0.76978565153521 | -2.88675914998996 |
| H  | -3.00950793667969  | -0.35237371471377 | -3.5599399214903  |
| C  | 3.12850743425686   | 0.06757784625170  | 2.36417296341241  |
| H  | 4.18223054900804   | 0.24872559592259  | 2.50772051645031  |
| C  | 2.38972826510767   | -1.01686584120739 | 2.88507594000468  |
| H  | 2.76504904600098   | -1.82076909277209 | 3.49932908965890  |
| H  | 2.02367455481827   | -1.78271970934674 | -3.22332448473881 |
| H  | 1.36554114859589   | -0.15327861303676 | -2.97536875701304 |
| C  | 0.35315779903339   | -3.07461304630303 | 3.25650524432024  |
| H  | -0.49780655318209  | -3.75034884893131 | 3.35320765292828  |
| H  | 0.77378541752513   | -2.91993083094878 | 4.25102085469325  |
| H  | 1.11210730206105   | -3.56735803047882 | 2.64777167108451  |
| C  | -4.12319453575360  | -1.52350271306487 | -1.41926421433627 |
| H  | -4.54076034781312  | -1.53840042639507 | -0.41339017276902 |
| C  | -2.73720509955582  | 5.06068250850445  | 0.45917226085838  |
| H  | -2.35886490626151  | 5.81359939086602  | 1.15130019865174  |
| H  | -3.821111126787047 | 0.50308295891092  | 0.57538496926366  |
| H  | -2.50822243626507  | 5.38112583866609  | -0.55699536201460 |
| C  | 3.77520862279404   | 2.79719985513208  | 1.59937160131159  |
| H  | 4.06431632058269   | 3.70852849512429  | 1.07542223908209  |
| H  | 4.65550953498929   | 2.15369653347375  | 1.62148526385157  |
| H  | 3.51105720864974   | 3.05561688484410  | 2.62369147888601  |
| C  | 3.10870176006762   | 1.77368122770074  | -0.54262284994230 |
| H  | 2.30635780851847   | 1.45212981193635  | -1.20046488181742 |
| H  | 3.87497964338485   | 0.99446011556289  | -0.51921015037029 |
| H  | 3.48180362936379   | 2.66791927803610  | -0.99532287988825 |
| Al | -0.48183090171325  | 0.80450703253911  | 0.50114894217534  |
| O  | 0.48638117844940   | -0.17034655177948 | -0.99658461523496 |
| N  | 0.98848687415998   | 0.30423754700574  | 1.71933684976839  |
| N  | -2.14509282045269  | 1.41233018029304  | -0.28435053957819 |
| N  | 0.14591942151117   | 2.63097479336016  | 0.65690605619883  |
| N  | -1.35860441364483  | -0.97178467843055 | 0.66908217952691  |
| C  | -0.63322744354060  | 3.76259622579950  | 0.65153984582042  |
| C  | -3.02817173985867  | 0.66158850605113  | -1.02156862796166 |
| C  | 1.70985476658056   | -2.03115903823816 | -1.78134294662249 |
| C  | -0.68318696772837  | -1.97273713807081 | 1.28630508896198  |
| C  | 1.44672054993295   | 3.05054644497515  | 0.80808259677071  |
| C  | -0.08768905424938  | -1.74622697937225 | 2.64746149056302  |
| C  | -2.69899770206592  | 2.66223168922934  | -0.16294711414328 |
| C  | 2.60223049447739   | -3.85474207015992 | -3.63955226718032 |
| C  | 1.09248150811951   | -0.83674527730229 | 2.46966663506678  |
| C  | 1.17957251745083   | -2.02577428013968 | -3.06915600519655 |
| H  | 0.41552288720350   | -1.30954393668999 | -3.33191416428754 |
| H  | -1.1297668371539   | -1.11332885663833 | 3.58462137177236  |
| H  | -1.48103419895554  | -0.14885763543552 | 3.22028954396072  |
| H  | -0.69384747585140  | -0.95302299909287 | 4.57231806306354  |
| C  | -2.00340795621743  | -1.75989077754564 | 3.68782802963131  |
| C  | -3.89524671595572  | 2.71320915659982  | -0.63408726827748 |
| H  | -4.55962465938670  | 3.55997994182930  | -0.90397870787865 |
| C  | 2.24864792611117   | 0.85875400160946  | 1.6585105863870   |
| C  | 3.14770380333963   | -3.87510439423754 | -2.36373498431177 |
| H  | 3.90835823034299   | -4.59402417124406 | -2.09936843879196 |
| C  | -1.84709094763601  | -1.48675211372624 | -0.51632588403516 |
| C  | 0.15920228945804   | 4.87737165763850  | 0.75512014042834  |
| H  | -0.17269399463692  | 5.90294516384482  | 0.79156716648359  |
| C  | -1.43786635256749  | -2.79198234935634 | -0.65865033324830 |
| H  | -1.68205117809122  | -3.45999333592729 | -1.46944147329502 |
| C  | 1.49105396131332   | 4.42169612656523  | 0.85186870456706  |
| H  | 2.37121273345932   | 5.03633756331828  | 0.95601725644118  |
| C  | 1.28699654595125   | -1.07625617041453 | -0.75885349860808 |
| H  | 1.76575014809837   | -1.7229716357955  | 0.21795150354425  |
| C  | -0.67227428780409  | -3.10535564834644 | 0.48677233473445  |
| H  | -0.23855006628700  | -4.06345564277946 | 0.7307384795843   |
| N  | 0.307418971504207  | -4.82121481105916 | -4.62670454977094 |
| O  | 0.92721625625168   | -5.60340734724235 | -4.28182980728540 |
| O  | 2.58530989870009   | -4.78103674115924 | -5.72974366083030 |

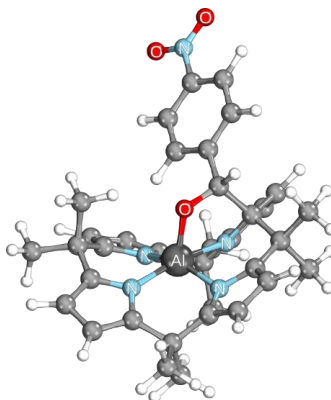**[1]-p-nitrobenzaldehyde 1,2 adduct B**

|    |                   |                   |                   |
|----|-------------------|-------------------|-------------------|
| Al | 2.05288443891557  | 8.03447137832504  | 12.56299029502551 |
| O  | 3.10220857842838  | 7.94460043535024  | 11.10362009455740 |
| N  | 3.74340007120641  | 7.42781255914101  | 13.48591724144851 |
| N  | 0.26472024629624  | 8.51402130712124  | 12.12244247456553 |
| N  | 2.55335980954108  | 9.82534313035970  | 13.14772343999843 |
| N  | 1.42776544335572  | 6.21369991065191  | 12.99228652776870 |
| C  | 1.72509169608838  | 10.90391056767101 | 13.00857946531321 |
| C  | -0.63427080288121 | 7.67921714329519  | 11.50997428107092 |
| C  | 4.90078355406789  | 6.40537309936777  | 10.77546647782356 |
| C  | 1.95350897072894  | 5.28246975109347  | 13.84992588011946 |
| C  | 3.83906463473478  | 10.27829802512750 | 12.95370112377582 |
| C  | 2.99610906185899  | 5.63000996998409  | 14.88817267454148 |
| C  | -0.36735003940852 | 9.70609388061808  | 12.35198062814055 |
| C  | 5.81857323776213  | 3.90411123735151  | 10.00188731819382 |
| C  | 4.06918810653533  | 6.40548392810153  | 14.18191679364268 |
| C  | 4.09119251261189  | 5.28226901069884  | 10.91947384490604 |
| H  | 3.09418359421527  | 5.37271575824336  | 11.32728912917139 |
| C  | 2.39659641242191  | 6.51761371825024  | 15.99463975518303 |
| H  | 1.96456273512290  | 7.43233450266631  | 15.59054333469516 |
| H  | 3.1512924222147   | 6.80105445358488  | 16.73313688549360 |
| H  | 1.60219377126267  | 5.97188387208295  | 16.50401139821525 |
| C  | -1.65032577625961 | 9.64394705404808  | 11.86259540565520 |
| H  | -2.39654085556693 | 10.42226714307079 | 11.90706565420161 |
| C  | 4.87531767154614  | 7.95676825228574  | 12.78098138278978 |
| C  | 6.63265588511120  | 5.01275878417190  | 9.81478575452815  |
| H  | 7.61114842642584  | 4.90972141886306  | 9.36953826852229  |
| C  | 0.48452104374085  | 5.57495956700132  | 12.23120285757157 |
| C  | 2.46293883327949  | 12.03171029580098 | 12.73682671068772 |
| H  | 2.08572943556483  | 13.02982422291845 | 12.57915029550031 |
| C  | 0.42341417869621  | 4.24606427630447  | 12.59575526482543 |
| H  | -0.22282777984935 | 3.49073261614818  | 12.17738389219550 |
| C  | 3.81583391389667  | 11.62919791996538 | 12.69551279009240 |
| H  | 4.66593794694597  | 12.27054898972055 | 12.57158183866786 |
| C  | 4.44360805610357  | 7.77275946340005  | 11.24906307160369 |
| H  | 5.00861370537666  | 8.52004588660198  | 10.67061038177384 |
| C  | 3.16312364888245  | 4.05909417605109  | 13.63200958778975 |
| H  | 1.56300875095662  | 3.13858378928607  | 14.15891149203904 |
| C  | 4.54886565685997  | 4.03064917525287  | 10.54691543928778 |
| H  | 3.91327239127803  | 3.16782474050520  | 10.68257948968731 |
| C  | -0.28685616520130 | 6.2635138586497   | 11.12504519381386 |
| C  | 0.24264040271967  | 10.77683153268209 | 13.22002418518485 |
| C  | 6.16203266628251  | 6.25158952128395  | 10.20358934091248 |
| H  | 6.78924318574543  | 7.12394236253573  | 10.05647408748628 |
| C  | -1.82015574569832 | 8.34850171798907  | 11.32265122373141 |
| H  | -2.71528509323947 | 7.96040048961968  | 10.86208957747486 |
| C  | 5.99101546672378  | 7.06965675681889  | 13.23005025322707 |
| H  | 7.02032097294934  | 7.16337283908073  | 12.91744124659072 |
| C  | 5.5034992783106   | 6.15235617003911  | 14.07599729923995 |
| H  | 6.04185657082989  | 5.35181434185409  | 14.55886619659099 |
| C  | -1.57994428428698 | 5.48453975024033  | 10.86676527806207 |
| H  | -2.20652871615302 | 5.44280982395765  | 11.75725920482236 |
| H  | -1.36020690737522 | 4.46418580569918  | 10.55001930437311 |
| C  | -2.15154522781426 | 5.95136480717316  | 10.06386976227012 |
| C  | 5.07747540408040  | 9.44945397502403  | 13.19975256939368 |
| C  | -0.01490566435065 | 10.41268426939278 | 14.69855249316746 |
| H  | 0.42796371201235  | 9.44905877086895  | 14.95214477477016 |
| H  | 1.08698047392160  | 10.34263404987142 | 14.89213213592517 |
| H  | 0.41695628433526  | 11.1640494197509  | 15.36404517981073 |
| C  | 5.52093859490849  | 6.24238485829957  | 9.80975445451562  |
| H  | -0.06983452159257 | 6.68855538449809  | 9.00684675002576  |
| H  | 0.76431882803971  | 5.21424193917280  | 9.52954214385014  |
| H  | 1.45117297282694  | 6.80059265018330  | 9.88176819576968  |
| C  | 3.57163695488494  | 4.36859315987104  | 15.52534412779974 |
| C  | 2.78675109858883  | 3.81549719307784  | 16.03996102850881 |
| H  | 4.33496005028033  | 4.61669172588794  | 16.26577336419522 |
| H  | 4.01265324968482  | 3.70553879353329  | 14.78039443271477 |
| C  | -0.43560053420242 | 12.11729030047237 | 12.94123075859753 |
| H  | -0.02707420934265 | 12.89821819112851 | 13.58482621514933 |
| H  | -1.50561514055854 | 12.05647160474690 | 13.14149302383433 |
| H  | -0.30188571450665 | 12.41940628088779 | 11.90261194058718 |
| C  | 5.39892913330301  | 9.51422570472084  | 14.70550614845012 |
| H  | 5.49285614136112  | 10.55977734855561 | 14.99813234772521 |
| H  | 6.33206544589735  | 9.0049885256280   | 14.95864335588354 |
| H  | 4.59710244727429  | 9.08552275936502  | 15.30550535410171 |
| C  | 6.27127822820549  | 10.04031798601798 | 12.44452236673530 |
| H  | 6.08472479632920  | 10.12819119894171 | 11.37523458880226 |
| H  | 7.17578524103397  | 9.44666439073589  | 12.59275262197572 |
| H  | 6.48868121625611  | 11.04141034187866 | 12.1555419785179  |
| N  | 6.30671463989755  | 2.59208090162854  | 9.60933815106259  |
| O  | 5.58070913219741  | 1.64181403997937  | 9.78118441524206  |
| O  | 7.4175835848649   | 2.52068973874534  | 9.1380016667207   |

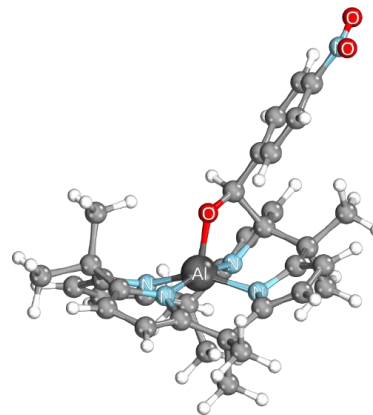**[1]-p-nitrobenzaldehyde 1,2 adduct A**

|    |                    |                   |                   |
|----|--------------------|-------------------|-------------------|
| N  | -0.05511853538871  | -2.32104099522403 | 0.40662879917814  |
| C  | -0.26376094622566  | -3.50676284278696 | 1.05852860172639  |
| C  | 0.37942028106982   | -2.63001644382257 | -0.85691451403074 |
| C  | 0.03985800602046   | -4.55640482741329 | 0.21905849373782  |
| H  | -0.02987574043392  | -5.6078520854128  | 0.44843734433749  |
| C  | 0.45071717407049   | -3.99504193064386 | -1.00819695235767 |
| H  | 0.76634631139754   | -4.5348901075223  | -1.88801206580330 |
| N  | 0.02514471760252   | -1.25598910990756 | 2.92721750916042  |
| C  | 0.62737792204898   | -0.58706617012607 | 3.95885039082202  |
| C  | -0.20982924649459  | -2.54003170291173 | 3.34831696259373  |
| C  | 0.74934560584665   | -1.42712845824885 | 5.03920728883703  |
| C  | 0.21188317068975   | -2.67564990475467 | 4.64924922898128  |
| H  | 0.15789911476371   | -3.56607351681229 | 5.25612778546080  |
| N  | 0.03373587787876   | 1.27279537496150  | 1.63343680862148  |
| C  | -0.68113975523107  | 2.31451908778498  | 1.08172207730486  |
| C  | 0.37550294145066   | 1.65714385064066  | 2.90104112162187  |
| C  | -0.79143455327283  | 3.33580944300305  | 1.99543487654946  |
| H  | -1.28374097378470  | 4.28500940649039  | 1.84740194835794  |
| C  | -0.11017375197123  | 2.91747901102632  | 3.16029635420455  |
| H  | 0.00729106461773   | 3.48087159458422  | 4.07258990923981  |
| C  | -0.27568434389726  | -0.50733715020351 | -1.82801000680539 |
| C  | -1.63572873706645  | 0.98512077600112  | -0.85295059465253 |
| H  | -0.06164644871875  | -2.64989861113911 | -3.57662493173096 |
| C  | 0.87370114441373   | -2.18102668775672 | -3.26950523094135 |
| C  | 1.2755554085251    | -0.94475766033210 | -1.50509326685886 |
| C  | 0.717173582671146  | -1.57973829043583 | -1.87040892597615 |
| H  | 2.89974890016657   | -1.71408890190721 | -1.51962618934406 |
| H  | 1.65083689912995   | -2.9438845293430  | -3.296082739442   |
| H  | 2.11223634061350   | -0.50924877892923 | -0.50649733706254 |
| H  | 2.66589887811941   | -2.43185019828737 | 2.01217762539342  |
| C  | -2.37147305300296  | -3.40204873532756 | 2.40485865376883  |
| C  | -0.56678374630379  | -4.96816309269107 | 3.03632093490308  |
| C  | -0.83881396615702  | -3.57862074335468 | 2.45465719512304  |
| H  | 0.50148548733147   | -5.17573169529760 | 3.09484451416688  |
| H  | -2.81925705800793  | -4.1719977388924  | 1.77168288944449  |
| H  | -1.03711680739205  | -5.74090114117181 | 2.42664872075767  |
| H  | 3.08435923194466   | 1.59801162022133  | 2.95646923500991  |
| C  | 2.61452915940962   | 0.62340063622319  | 3.10956950694396  |
| C  | 1.43370846753161   | 1.44635807733493  | 5.13337294364442  |
| C  | 1.22949122051087   | 0.78109158139172  | 3.77329679733856  |
| H  | 2.09734722978165   | 0.84846783109051  | 5.75866377920809  |
| H  | 2.53578589549190   | 0.13485162969633  | 2.13810611992927  |
| H  | 0.48803780210836   | 1.56633803121325  | 5.66202630190189  |
| C  | -1.08256664799286  | 2.36974360379087  | -0.36985950240364 |
| C  | -2.07944087691624  | 3.50568349160354  | -0.62215363141136 |
| C  | 0.18037432655011   | 2.71714670302527  | -1.18844091643678 |
| H  | -2.39801636162875  | 3.53088518904574  | -1.6656545464024  |
| H  | -0.02162079347327  | 2.79395268988669  | -2.25992968931184 |
| C  | -2.96527548603269  | 3.45701143943304  | 0.00298259450030  |
| H  | 0.98185314541104   | 1.99763348125098  | -1.03386789861015 |
| H  | -1.59373671735212  | 4.48045881916311  | -0.41828644540307 |
| H  | 0.55221737447231   | 3.68306243193429  | -0.84684232670561 |
| H  | 2.40780374237377   | -0.15783412826277 | -2.21069311424909 |
| H  | 1.14163653741137   | -0.14946528577877 | -4.00516058836673 |
| H  | -0.98890584950268  | -5.05095708450682 | 4.03841872672460  |
| H  | -2.78828518696573  | -3.49355959214993 | 3.41032432255444  |
| H  | 1.89261997457112   | 2.42955974557763  | 5.01664501554773  |
| H  | 3.26737434506906   | 0.01079552259987  | 3.73432005186368  |
| H  | 1.19516596499125   | -1.19106116367399 | 5.99318375693782  |
| Al | -0.47406541026031  | -0.57669409025668 | 1.21970276787951  |
| C  | -2.77452110007183  | 0.26073912017761  | 0.01872818843531  |
| O  | -2.24891915930634  | -0.28288211937474 | 1.14769361901324  |
| C  | -1.93016343952070  | 0.93651199939010  | -2.31450302796004 |
| H  | -2.68022576697585  | 1.53396133545701  | -2.81176446567620 |
| H  | -1.11364487542897  | 0.04286402218102  | -2.8916664902661  |
| H  | -1.08104165193035  | -0.24352935907449 | -3.93175299164423 |
| N  | -0.56550455528333  | 0.03691676777957  | -0.70858074246113 |
| C  | -3.15236624009703  | -0.52106170665950 | -0.66724570446234 |
| C  | -3.9424500618886   | 1.16464654055624  | 0.32728795573083  |
| C  | -0.06662971883032  | 2.85338728429664  | 0.87987920215732  |
| C  | -0.08119342172092  | 1.72538443296151  | 1.59377741360723  |
| C  | -4.90479075414245  | 1.43646421549585  | -0.64084153194684 |
| C  | -5.96560230523467  | 2.28271687308226  | -0.38095461411323 |
| C  | -5.13685264659017  | 2.57463532043347  | 1.87238888593325  |
| H  | -3.34272402115874  | 1.50582253986185  | 2.35172616838658  |
| H  | -4.82770405467025  | 0.97209829537468  | -1.61715164916783 |
| H  | -6.70459095898430  | 2.48973143762181  | -1.1405943383489  |
| H  | -5.230767334590071 | 3.01811431634225  | 2.85276678970842  |
| N  | -7.17619041565729  | 3.74946702313662  | 1.16547730404248  |
| O  | -7.25326239720470  | 4.22032102676800  | 2.27544223323738  |
| O  | -7.96277598111416  | 3.97695893986828  | 0.274             |

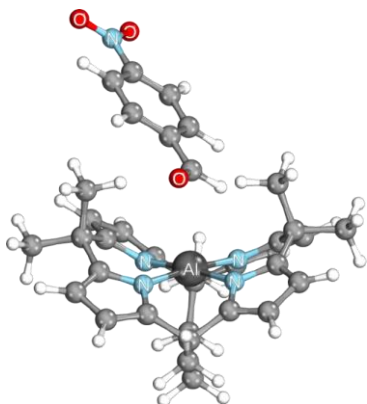**[1]-*p*-nitrobenzaldehyde TS 1 isomer B/A**

|    |                   |                   |                   |
|----|-------------------|-------------------|-------------------|
| C  | 2.49963984198075  | 2.42728875737425  | 0.80205523168573  |
| C  | -2.63280840812748 | 3.09054588107498  | 2.55301457538326  |
| C  | 1.51337122187356  | -3.91520715469234 | -3.65557200390954 |
| H  | 1.04043242005900  | -4.13270098915146 | -4.60164284447226 |
| C  | -2.59604509892806 | -0.40731818224611 | -1.71028714253460 |
| C  | -2.31807908494118 | 3.68764795027581  | 1.16302906192487  |
| C  | 2.73620819133713  | -3.38565157018348 | -1.21715553967744 |
| H  | 3.19638121066238  | -3.16949257241007 | -0.26019519449444 |
| H  | -2.1552128131843  | 2.12074469643031  | 2.70177990181671  |
| C  | -4.13336108234498 | 1.61495308563790  | -1.30779904978326 |
| H  | -4.94954572764092 | 1.33572808901229  | -1.95551689866858 |
| H  | -3.70762435581165 | 2.93999645435351  | 2.67162185203709  |
| H  | -2.27516365822083 | 3.75108787895326  | 3.34528619534691  |
| C  | -1.87349631729637 | -0.10862940623168 | -3.03962538438210 |
| H  | -2.54846402008571 | 0.42136607664691  | -3.71408808761354 |
| C  | 3.21470345392688  | 0.33070531059108  | 2.13852155281435  |
| C  | 4.24890780064029  | 0.58426231847385  | 2.31017345721471  |
| C  | 2.55724827768454  | -0.84587758981958 | 2.56914856466887  |
| H  | 2.98987539441601  | -1.65787762569795 | 3.13303839011706  |
| H  | -1.55879439803029 | -1.03502150500719 | -3.52676739636359 |
| H  | -0.99426580427140 | 0.51335019276972  | -2.89365508804229 |
| C  | 0.66615399086292  | -3.07835774808017 | 2.7522565665794   |
| H  | -0.14577072437607 | -3.80050836693843 | 2.84737373206884  |
| H  | 1.14307575739998  | -2.98318562727627 | 3.72839767457092  |
| H  | 1.40177785481261  | -3.48354266543734 | 2.05626639925060  |
| C  | -3.86586773286986 | -1.20341704101228 | -2.05172276792098 |
| H  | -4.43514474125857 | -1.43622148241564 | -1.15297996930316 |
| C  | -3.03276544726687 | 0.03435767582410  | 1.06605270518118  |
| H  | -2.68293657618706 | 5.70853244746455  | 1.85301899706243  |
| H  | -4.10922056112922 | 4.91094101917638  | 1.18963966801166  |
| H  | -2.84934187639270 | 5.05951252889535  | 1.0274535295487   |
| H  | -3.61581346454277 | -2.14053490853316 | -2.54981688325897 |
| H  | -4.50806439412884 | -0.64157664989303 | -2.73102891755608 |
| C  | 3.72415340028974  | 3.10674237838988  | 1.42020092545238  |
| C  | 3.90686708961101  | 4.07221536532010  | 0.94739078647818  |
| H  | 4.61965961128292  | 2.50288875854048  | 1.26732940225243  |
| C  | 3.59330056796725  | 3.26546681992366  | 2.48999630220842  |
| C  | 2.79044390327581  | 2.25343147011843  | -0.70272711873070 |
| H  | 1.93589059078216  | 1.85684356789348  | -1.24478333239012 |
| H  | 3.63240817479461  | 1.57502821793951  | -0.85983585998814 |
| H  | 3.03543444273016  | 3.22092438555600  | -1.14550504904697 |
| Al | -0.51305121762361 | 1.00673189352439  | 0.53603766517902  |
| O  | 0.88468095658989  | -0.32846300531989 | -1.48965374534451 |
| N  | 1.07552605451594  | 0.43692760550308  | 1.47279680331577  |
| N  | -2.17842813212670 | 1.58892867598582  | -0.20728963066462 |
| N  | 0.01369180600932  | 2.82167193851201  | 0.85101523808151  |
| N  | -1.13791031699653 | -0.80658677872419 | 0.34997905800461  |
| C  | -0.83639282809616 | 3.88483133232976  | 1.04052740067297  |
| C  | -2.99421802399594 | 0.88916835538530  | -1.06480470952072 |
| C  | 1.84540650440488  | -2.46962381965747 | -1.76531106221217 |
| C  | -0.53353860182217 | -1.87776515829545 | 0.94132196729388  |
| C  | 1.29454913818951  | 3.30424040349086  | 0.98231907646856  |
| C  | 0.13043947958337  | -1.72922696245219 | 2.28099955006270  |
| C  | -2.83066793527708 | 2.75815533063315  | 0.10297208791406  |
| C  | 2.40644570355274  | -4.81679877345830 | -3.08995230464693 |
| C  | 1.25597619349604  | -0.74580992703737 | 2.14265566922366  |
| C  | 1.23768228422262  | -2.73858532494112 | -2.98813252152109 |
| H  | 0.54036837622246  | -2.02299534400214 | -3.40075818731109 |
| C  | -0.89083134981413 | -1.23638926138692 | 3.32360244349909  |
| H  | -1.31250858854766 | -0.26407473231459 | 3.06580629399907  |
| H  | -0.41414345880982 | -1.13385267358805 | 4.30014931407856  |
| H  | -1.72426013877900 | -1.93621411884999 | 3.40959305218348  |
| C  | -4.03097500879525 | 2.80724961689062  | -0.55751759435378 |
| H  | -4.76609029014871 | 3.59446910656428  | -0.49330032103846 |
| C  | 2.28336699420865  | 1.09621646049764  | 1.47743413850460  |
| C  | 3.02559806956133  | -4.56690574797005 | -1.87385337331137 |
| C  | 3.71544364594838  | -5.28049202682629 | -1.44898548951662 |
| C  | -1.74783363010214 | -1.26082287661575 | -0.79771647507779 |
| C  | -0.1084565543509  | 5.02406281044975  | 1.26632389073902  |
| H  | -0.50008425443497 | 6.00965052889442  | 1.46331445072438  |
| C  | -1.50270499481309 | -2.60852215746538 | -0.93691063788537 |
| H  | -1.85911082623333 | -3.24914434885595 | -1.72882882498415 |
| C  | 1.25568903122246  | 4.65332158462997  | 1.22348991821195  |
| H  | 2.10224429316530  | 5.30788632432609  | 1.35896562491195  |
| C  | 1.58131101543404  | -1.21060618665754 | -1.03729368242086 |
| H  | 2.09896552233116  | -1.10819299642423 | -0.07437901173556 |
| H  | -0.72350749898281 | -3.00454045428829 | 0.17005343677175  |
| H  | -0.38531251898046 | -4.00430951852567 | 0.39499292665196  |
| N  | 2.70384298442694  | -6.05867638325864 | -3.79399525273343 |
| C  | 4.48383806724775  | -6.82451968554785 | -3.27925817737331 |
| O  | 2.15524563415144  | -6.25100353823080 | -4.85277086922709 |

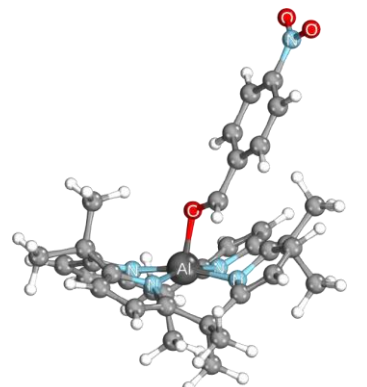**[1]-*p*-nitrobenzaldehyde TS 2 adduct A**

|    |                    |                   |                   |
|----|--------------------|-------------------|-------------------|
| C  | 2.73272368227292   | 2.14117503861886  | 1.40964474385111  |
| C  | -2.70813588635452  | 3.24628165053777  | 1.53162685580222  |
| C  | 1.29468464271592   | -1.56371660130523 | -4.68738036421558 |
| H  | 1.21860913327063   | -0.95419481328325 | -5.57549800824633 |
| C  | -2.30588407645474  | -1.29287170174095 | -1.17247998556628 |
| C  | -1.94647120467816  | 3.47992926107339  | 0.21016974453466  |
| C  | 1.48828501373370   | -3.15139807992460 | -2.41423970138536 |
| H  | 1.54679656450321   | -3.76154659832693 | -1.52164763972175 |
| H  | -2.36213110271213  | 2.34892148932749  | 2.04587768248302  |
| C  | -2.87650504322045  | 0.92829629838057  | -2.31391290410544 |
| H  | -3.35668073734073  | 0.53428145378818  | -3.19705838085091 |
| H  | -3.77797996505784  | 3.12649737318298  | 1.34607131197712  |
| H  | -2.55944961187701  | 4.08963387955703  | 2.20877626542419  |
| C  | -2.31498997592290  | -1.99272096370137 | -2.53186963599233 |
| H  | -3.181142429996023 | -1.67903089578385 | -3.11418645897190 |
| C  | 3.02220171967944   | 0.38018082068369  | 3.26960199913823  |
| H  | 3.98474925629600   | 0.69341733021820  | 3.64171226072060  |
| C  | 2.25510526470838   | -0.70230034724960 | 3.74805435825647  |
| H  | 2.51324511177685   | -1.36871556625354 | 4.55650676737470  |
| H  | -2.38681757987848  | -3.07574145217749 | -2.41881740101926 |
| H  | -1.42711096619398  | -1.76989271981459 | -3.11809334428323 |
| C  | 0.29340825390003   | -2.8509644073796  | 4.01411437746765  |
| H  | -0.55390356210970  | -3.53358141872692 | 4.10150957124051  |
| H  | 0.56474060706430   | -2.53292680105364 | 5.02075213030569  |
| H  | 1.13878079581000   | -3.39975039602048 | 3.59832186647858  |
| C  | -3.65042804944836  | -1.61120446969326 | -0.47074702798920 |
| H  | -3.69251907667968  | -1.13237969207678 | 0.50675974732735  |
| C  | -2.48803713320225  | 4.76158292375962  | -0.41953206288707 |
| H  | -2.36520108289855  | 5.6068526172296   | 0.25872433393836  |
| H  | -3.55385369392794  | 4.66351236984985  | -0.63206866642441 |
| H  | -1.97069063868310  | 4.99588475393081  | -1.34968284190523 |
| H  | -3.77854817271603  | -2.68786091459187 | -0.33207079553213 |
| H  | -4.48160184392705  | -1.23098790897519 | -1.06698425212861 |
| C  | 3.77421999830220   | 2.95198884745194  | 2.18940413103065  |
| H  | 4.11214277160334   | 3.80606650265916  | 1.60192235283497  |
| H  | 4.65556907184822   | 2.34612216147568  | 2.40313066006974  |
| H  | 3.36989243489325   | 3.31950336118646  | 3.13184086523390  |
| C  | 3.42724380496339   | 1.67348058298178  | 0.11270494567298  |
| H  | 2.75668753787510   | 1.12819817251702  | -0.54405715815919 |
| H  | 4.27329560986452   | 1.02385570634179  | 0.34895328460419  |
| H  | 3.79685498859525   | 2.53771305805121  | -0.44345562705386 |
| Al | -0.16847178684024  | 0.68714202584954  | 0.65615901047114  |
| O  | 0.75261403077868   | 0.01455361416789  | -0.87238315489923 |
| N  | 1.12714130509970   | 0.28023034545532  | 2.06557638746104  |
| N  | -1.79242411104119  | 1.05843732330110  | -0.34833376434124 |
| N  | 0.31833315709421   | 2.54381688358408  | 0.75784450008242  |
| N  | -0.92265632194374  | -1.18608669984828 | 0.89975075778790  |
| C  | -0.48003746217590  | 3.62855556112710  | 0.49797368501421  |
| C  | -2.24232315816279  | 0.20417349564478  | -1.33283876195058 |
| C  | 1.13084914259764   | -1.80995485435391 | -2.2996893459749  |
| C  | -0.50430249197517  | -2.08887409803849 | 1.79130681003763  |
| C  | 1.56042266336901   | 3.03008276055244  | 1.0916085093940   |
| C  | -0.0729603063268   | -1.64456196254505 | 3.15379704761254  |
| C  | -2.18525711230673  | 2.31876467444734  | -0.70831396557427 |
| C  | 1.64544517769870   | -2.9032968753653  | -4.77759392142076 |
| C  | 1.10840748671610   | -0.72950185578573 | 2.99508426627589  |
| C  | 1.04035828985735   | -1.01807068951076 | -3.44336857144442 |
| H  | 0.75310085226418   | 0.02064146186305  | -3.35091198648102 |
| C  | -1.23745566963562  | -0.90319545977673 | 3.83843246850321  |
| H  | -1.54470406127550  | -0.01988866944819 | 3.27915627754006  |
| H  | -0.92986829345027  | -0.57244483291846 | 4.83138552689554  |
| H  | -2.11203060628801  | -1.55021108393552 | 3.93962939932853  |
| C  | -2.84806324933137  | 2.28275712110532  | -1.30986434724448 |
| H  | -3.27557194599947  | 3.12117117782251  | -2.43707917011708 |
| C  | 2.30682067468270   | 0.96289136765146  | 2.24928113951573  |
| C  | 1.74850060979932   | -3.70759104076440 | -3.64966300141870 |
| H  | 0.02529934006153   | -4.74736332299467 | -3.73815941222019 |
| C  | -1.23672204022773  | -1.86068637159385 | -0.26917220595413 |
| C  | 0.24062160552007   | 4.78528915669784  | 0.65308111242176  |
| H  | -0.1212162733360   | 5.79311551917569  | 0.52355184412281  |
| C  | -1.00411582517541  | -3.23206013733300 | -0.05935495038606 |
| H  | -1.19573500896540  | -4.02151863196396 | -0.77079915472010 |
| C  | 1.54695534559941   | 4.40213473186094  | 1.02984673060897  |
| H  | 2.37362475745108   | 5.06487244906374  | 1.23197258107313  |
| C  | 0.88262046292073   | -1.23055806545657 | -0.97138828052176 |
| H  | 1.18482571955685   | -1.83872619433943 | -0.10999550312449 |
| C  | -0.52811155396065  | -3.37742555390367 | 1.23587252339107  |
| H  | -0.22651630161455  | -4.29119751042902 | 1.72292650099789  |
| N  | 1.91485868512623   | -3.48298031439417 | -6.08737478873120 |
| O  | 2.21347475863400   | -4.65323539607725 | -6.13306150347664 |
| O  | 1.82490087427568   | -2.76188505254937 | -7.05183992306372 |

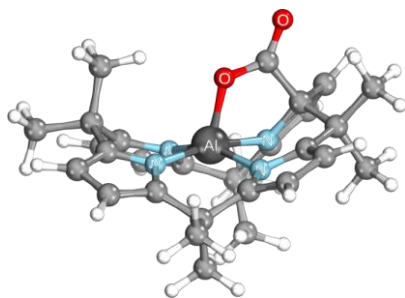**[1]-CO<sub>2</sub> 1,2 adduct**

|    |                   |                   |                    |
|----|-------------------|-------------------|--------------------|
| Al | 2.04134190655131  | 7.97566326269415  | 12.64814893291232  |
| O  | 3.16384891833398  | 7.80164806481107  | 11.18496355569006  |
| N  | 3.70292028373871  | 7.42792166888565  | 13.62204027524337  |
| N  | 0.28734765726023  | 8.45806767913103  | 12.10984535739964  |
| N  | 2.56228223339642  | 9.79140387666582  | 13.12664555486909  |
| N  | 1.41172851227294  | 6.17679410357784  | 13.09894923860075  |
| C  | 1.75249731937160  | 10.88149855878791 | 12.96334205287672  |
| C  | -0.59511322959727 | 7.61672917497564  | 11.48031667556493  |
| C  | 1.86853866578825  | 5.29771522394219  | 14.04780507851178  |
| C  | 3.86388690535879  | 10.24093203621875 | 13.04098114867131  |
| C  | 2.94057405065929  | 5.65940180241715  | 15.05118249108720  |
| C  | -0.31705681026968 | 9.68221124633026  | 12.22443468073415  |
| C  | 4.01341977020181  | 6.38588712566507  | 14.29708578111334  |
| C  | 2.38196302563507  | 6.59768267240890  | 16.13788206613288  |
| H  | 1.96079388007206  | 7.50654677690342  | 15.70976404536696  |
| H  | 3.15640887544799  | 6.89155200032506  | 16.85160782319969  |
| H  | 1.58667334619610  | 6.08617730946592  | 16.68026761166820  |
| C  | -1.56023722803817 | 9.63208447363821  | 11.64252766849749  |
| H  | -2.27993689419720 | 10.43415019754100 | 11.58696656558306  |
| C  | 4.83314636243893  | 7.91088099043187  | 12.88225614763635  |
| C  | 0.41021150478081  | 5.54272480606912  | 12.41316903757918  |
| C  | 2.51543749017898  | 12.01034717221702 | 12.78158786489730  |
| H  | 2.15706041687293  | 13.01603849002593 | 12.62865989775073  |
| C  | 0.23193953774354  | 4.27600771772290  | 12.92421523250889  |
| H  | -0.47788378243292 | 3.53769697093346  | 12.58638329427120  |
| C  | 3.86441471550819  | 11.59856401475519 | 12.82406661303837  |
| H  | 4.72960339058612  | 12.23474809070537 | 12.71585965763780  |
| C  | 4.43566128807719  | 7.81770487919449  | 11.37005675750011  |
| C  | 1.16600993379577  | 4.11872945240404  | 13.97010424311462  |
| H  | 1.29509618434433  | 3.24463529988481  | 14.59008934808356  |
| C  | -0.28170094298221 | 6.16453544175942  | 11.22152525169306  |
| C  | 0.28582082536434  | 10.77295643092510 | 13.08939593687855  |
| C  | -1.73677134762354 | 8.31270259260542  | 11.16492995985742  |
| H  | -2.61012483860877 | 7.92655106380971  | 10.66288689302109  |
| C  | 5.91363362117742  | 6.95183768532313  | 13.23857369251174  |
| H  | 6.91464197789264  | 6.98991873955331  | 12.83770251006290  |
| C  | 5.42259908489546  | 6.05615657882292  | 14.10744278105534  |
| H  | 5.93772669406780  | 5.21781069240861  | 14.54995123765715  |
| C  | -1.58958125809068 | 5.41336752836590  | 10.95713677919454  |
| H  | -2.26198783306740 | 5.46715449432102  | 11.81301574914021  |
| H  | -1.39336807627094 | 4.36349160725551  | 10.73541616381487  |
| H  | -2.10109352172721 | 8.53278391905831  | 10.090223595940265 |
| C  | 5.09075814465890  | 9.39627033760981  | 13.30428222906290  |
| C  | -0.06719005052330 | 10.45788339357112 | 14.56189975057529  |
| H  | 0.33396141231782  | 9.50111120952372  | 14.87275183424436  |
| H  | -1.16912089090089 | 10.39901996397618 | 14.69543209909364  |
| H  | 0.31097072869610  | 11.22889802974387 | 15.22582907662771  |
| C  | 5.9088175523913   | 6.00674781206736  | 9.95838919675473   |
| H  | 0.06781975325751  | 6.41930685388833  | 9.09294359770046   |
| H  | 0.79460982425928  | 4.94994873954153  | 9.77066390693092   |
| H  | 1.54597839284089  | 6.51911724919471  | 10.03860914927505  |
| C  | 3.50162117569914  | 4.40937907058840  | 15.72384477330806  |
| H  | 2.72001618668759  | 3.90157000105931  | 16.28773842034221  |
| H  | 4.29594894819033  | 4.66653072936554  | 16.42792370620051  |
| C  | 3.89694020853183  | 3.70194138276241  | 14.99453933857833  |
| H  | -0.38834758408237 | 12.11056891025847 | 12.73292236182231  |
| H  | -0.01270419442679 | 12.90582736016171 | 13.37864205521806  |
| H  | -1.46896383476805 | 12.06410165628555 | 12.87034163271751  |
| H  | -0.18807860922909 | 12.38276241707724 | 11.69674262698689  |
| C  | 5.40851762897867  | 9.44566130934783  | 14.80929760143214  |
| H  | 5.57403398633920  | 10.48401396579433 | 15.09614866499166  |
| H  | 6.30646395263605  | 8.87701003942951  | 15.06371901253117  |
| H  | 4.57977884508981  | 9.07551082739872  | 15.41153784530490  |
| C  | 6.29782768215916  | 9.95512639006938  | 12.54707358891936  |
| H  | 6.12705134965714  | 10.0062085432384  | 11.47505968591819  |
| H  | 7.18988251999666  | 9.35123850278105  | 12.72316922226947  |
| H  | 6.5204077732887   | 10.96087586535858 | 12.90295324316754  |
| O  | 5.29801727428891  | 7.76948753017017  | 10.52778736799563  |

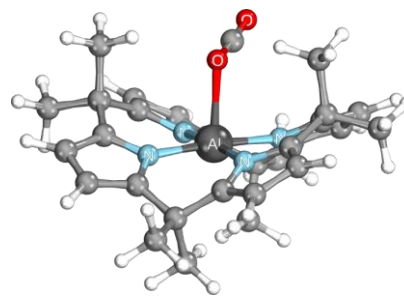**[1]-CO<sub>2</sub> sigma adduct**

|    |                   |                   |                   |
|----|-------------------|-------------------|-------------------|
| N  | -2.39943790183754 | -3.31258252916980 | 1.32639633808967  |
| C  | -1.06391807174690 | -3.62859033597498 | 1.20809863631838  |
| C  | -3.09722878087994 | -4.49327964580036 | 1.25629756240062  |
| C  | -0.93176623519829 | -4.98400854347332 | 1.03055506671453  |
| H  | -0.01057099315264 | -5.52907833369504 | 0.89688548272292  |
| C  | -2.22978261901829 | -5.53728897801890 | 1.06688439726766  |
| H  | -2.48587634655347 | -6.58206500150294 | 0.98744235168269  |
| N  | -1.54900531810407 | -0.99059073576063 | 2.38502326747901  |
| C  | -1.42422602415876 | 0.06488826123265  | 3.25182557456051  |
| C  | -0.27370032318592 | -1.41842838423134 | 2.0798935357670   |
| C  | -0.09811225034004 | 0.33307778727880  | 3.47424009535868  |
| C  | 0.63523463607978  | -0.60844997438287 | 2.72048368267815  |
| H  | 1.71013431045005  | -0.69271568690394 | 2.68063130481071  |
| N  | -4.01058254924548 | 0.15102605529562  | 1.85355891258924  |
| C  | 4.96640060697101  | 0.75888401026022  | 1.06664644249835  |
| C  | -3.60355500268496 | 1.07605161282319  | 2.78073811626124  |
| C  | -5.12074772078597 | 2.06300359283906  | 1.47647869859473  |
| H  | -5.79813307039959 | 2.79150934766608  | 1.05878248977215  |
| C  | -4.25691690177150 | 2.26374070071258  | 2.57468348526815  |
| H  | -4.14441024739166 | 3.16980259292687  | 3.14910279445610  |
| N  | -4.86044078143679 | -2.17308841049956 | 0.80212224050920  |
| C  | -5.30042855603740 | -3.47414189206507 | 0.79740742393935  |
| C  | -5.83967366084032 | -1.41727942516255 | 0.19569752324478  |
| C  | -6.52048157767446 | -3.55222327356465 | 0.17811468700960  |
| H  | -7.11602253379867 | -4.44029908902709 | 0.03633651073184  |
| C  | -6.86202803383322 | -2.23907375291935 | -0.21087889847202 |
| H  | -7.76200375517175 | -1.94097362122702 | -0.72540599605232 |
| H  | -4.42617575150765 | -3.40138773221514 | 3.41537869494358  |
| C  | -4.79733482762092 | -4.36413042866401 | 3.05792037203753  |
| C  | -5.12145831660202 | -5.92027757259867 | 1.15709411359822  |
| C  | -4.56789743775110 | -4.54973571864852 | 1.54161820926945  |
| H  | -4.61823303103278 | -6.70959115640756 | 1.71678025610304  |
| H  | -4.27692223557917 | -5.14017224607491 | 3.622843680845142 |
| H  | -4.98984721926546 | -6.11576077397962 | 0.09301111329681  |
| H  | 1.12810350739800  | -3.59397719473144 | 2.85292308659512  |
| C  | 1.30372639143426  | -3.28902466868620 | 1.82268333931571  |
| C  | 0.43109687622265  | -2.22434656659797 | -0.22239595656843 |
| C  | 0.05447089867597  | -2.62007296902741 | 1.22331340679801  |
| H  | -0.42739455369187 | -1.89739116342751 | -0.80190965929711 |
| H  | 1.59063459104921  | -4.16842733855653 | 1.24572685718668  |
| H  | 0.84836229045459  | -3.08748518186521 | -0.74499788326014 |
| H  | -3.10330632941608 | 2.40875371339551  | 5.11371327096627  |
| C  | -2.22990837625861 | 1.94497657845684  | 4.65322709589041  |
| C  | -3.30375333297438 | -0.27972297088401 | 4.84646534324335  |
| C  | -2.63542857919925 | 0.70335808520865  | 3.86378474229358  |
| H  | -2.60725402162116 | -0.56264748131407 | 5.63813519728765  |
| H  | -1.74835771351608 | 2.68342830991351  | 4.01208746350197  |
| H  | -3.62670437152991 | -1.20055806659567 | 4.35766834519010  |
| C  | -5.75054858271385 | 0.06927483066263  | -0.02615348895329 |
| C  | -7.17491200748059 | 0.65044467635986  | -0.01253269646555 |
| C  | -5.18197891164490 | 0.36219619626777  | -1.43319184888581 |
| H  | -7.79234538656549 | 0.1880896014146   | -0.78339414358573 |
| H  | -5.88515357884861 | 0.01805698481401  | -2.19435971892166 |
| H  | -7.65262109114383 | 0.49385381940152  | 0.95313162637886  |
| H  | -4.24597242844335 | -0.15561417470142 | -1.62162695724434 |
| H  | -7.15945326536041 | 1.72095954158199  | -0.21970334848959 |
| H  | -5.02283205081763 | 1.43432533294257  | -1.57124035631458 |
| H  | -6.18495567990721 | -5.98558865814535 | 1.38982841950960  |
| H  | -5.86276768695868 | -4.40611917686786 | 3.29284972485992  |
| H  | 1.17805072728493  | -1.42691840075370 | -0.22404739630933 |
| H  | 2.15556505275771  | -2.60838536748495 | 1.80544150211317  |
| H  | -4.18879616879750 | 0.17248908083850  | 5.29825637144443  |
| H  | -1.53648817347911 | 1.68145623620663  | 5.45301963302764  |
| H  | 0.30600744654322  | 1.10378373633179  | 4.11160290368837  |
| Al | -3.17653638008033 | -1.56536165714499 | 1.50022293548173  |
| O  | -2.31409908148095 | -0.54815201504296 | -0.30300250949766 |
| C  | -1.87294127399872 | 0.51335779765601  | -0.08440739611841 |
| O  | -1.41779396084384 | 1.55415247530288  | 0.05310130760926  |

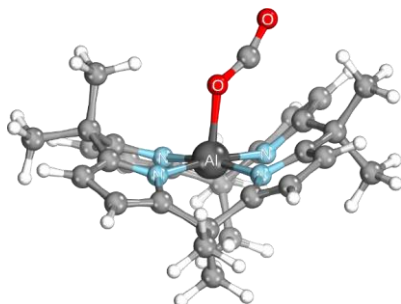**[1]-CO<sub>2</sub> TS2**

|    |                   |                   |                   |
|----|-------------------|-------------------|-------------------|
| Al | 2.04547067937461  | 7.97719844903252  | 12.93469776851523 |
| O  | 3.12015513422547  | 7.69336212851700  | 11.22480958264378 |
| N  | 3.70638791302723  | 7.51676348547603  | 13.89292589456298 |
| N  | 0.31671862893983  | 8.45450164175423  | 12.23205933310728 |
| N  | 2.57823551250190  | 9.83641063449352  | 13.10430601392948 |
| N  | 1.42890499241528  | 6.14045085588050  | 13.12922862797532 |
| C  | 1.75076556084097  | 10.91389369310217 | 12.93012858764834 |
| C  | -0.53158513142333 | 7.63992717117237  | 11.51493043287126 |
| C  | 1.85961652383456  | 5.20520923732807  | 14.03819265625519 |
| C  | 3.86710103895308  | 10.29597907030494 | 12.94552674153518 |
| C  | 2.88838471378799  | 5.52853744485457  | 15.08330167947214 |
| C  | -0.28998662615405 | 9.68444300834846  | 12.31346598611149 |
| C  | 3.98160113808087  | 6.31561306230368  | 14.43103203048914 |
| C  | 2.26036430789933  | 6.36084270297381  | 16.21797271886933 |
| H  | 1.82732189742495  | 7.29274168721052  | 15.85389893533188 |
| H  | 3.00656008075973  | 6.62059979433224  | 16.97237740556792 |
| H  | 1.46054301277957  | 5.79363419305902  | 16.69663818857955 |
| C  | -1.48539792467178 | 9.66207869318652  | 11.64386337079089 |
| H  | -2.18403501551903 | 10.47808261269006 | 11.54523124492388 |
| C  | 4.88093432092773  | 8.01531213018162  | 13.34878876849357 |
| C  | 0.46035727155533  | 5.52932631262457  | 12.36484602549334 |
| C  | 2.48735747794502  | 12.03400568527448 | 12.63846670126845 |
| H  | 2.10681997715996  | 13.02576467641545 | 12.45117919085688 |
| C  | 0.29362006502855  | 4.23158578429383  | 12.78501288741442 |
| H  | -0.38963602739733 | 3.50494799968607  | 12.37503076414353 |
| C  | 3.84202295404754  | 11.63565234000661 | 12.63899049509346 |
| H  | 4.69865664612877  | 12.27215928350541 | 12.47568638377678 |
| C  | 4.28770766415060  | 7.53906260261576  | 11.06497067332719 |
| C  | 1.18680172298337  | 4.02478409922165  | 13.85744935715974 |
| H  | 1.31202454009326  | 3.11728729953384  | 14.42745730973645 |
| C  | -0.24106013151635 | 6.19526401759714  | 11.20975340823148 |
| C  | 0.27581841627346  | 10.78785172207788 | 13.15705708302074 |
| C  | -1.63750072852639 | 8.35609535808776  | 11.12950174215390 |
| H  | -2.47300618153222 | 7.99030533050457  | 10.55387916324958 |
| C  | 5.885009485837203 | 7.06596870933819  | 13.55243997381895 |
| H  | 6.92179390077945  | 7.17191904637093  | 13.26928980683528 |
| C  | 5.31920762894171  | 5.99138964194838  | 14.23986762447702 |
| H  | 5.81097063776057  | 5.08019390124655  | 14.54112522785742 |
| C  | -1.56788749487795 | 5.46840669739380  | 10.95494125375693 |
| H  | -2.21672209952687 | 5.50799331700686  | 11.82885679829045 |
| H  | -1.39289270580714 | 4.42266549129745  | 10.69974460756597 |
| H  | -2.09566681764590 | 5.91484718882787  | 10.11188310021558 |
| C  | 5.09954926916167  | 9.51230709492187  | 13.31114432929056 |
| C  | 0.01359568610330  | 10.47928554018123 | 14.64681878798227 |
| H  | 0.47471137837589  | 9.54052418987862  | 14.95764461874506 |
| H  | -1.05836394246519 | 10.39227809000256 | 14.83467274411432 |
| H  | 0.42164933685442  | 11.26876611558164 | 15.28176242736890 |
| C  | 0.58112803361219  | 6.05918150594661  | 9.91073307800137  |
| H  | 0.02987225288929  | 6.49112154089013  | 9.07273127644292  |
| H  | 0.77683954571027  | 5.00653780648912  | 9.69497255931565  |
| H  | 1.53678183577651  | 6.56990404941538  | 9.96721989678650  |
| C  | 3.45038437342091  | 4.24698328656898  | 15.69313961669262 |
| H  | 2.66663064054197  | 3.69280945686254  | 16.21036252610776 |
| H  | 4.22837987017705  | 4.47816393212755  | 16.42299326271470 |
| C  | 3.87492950577859  | 3.59409162999122  | 14.93054356040047 |
| C  | -0.41799743253372 | 12.10783954244258 | 12.82888578434973 |
| H  | 0.01686038701149  | 12.91459266794347 | 13.44412928354447 |
| H  | -1.48757507808229 | 12.04217198988837 | 13.03151967974203 |
| H  | -0.28553197439531 | 12.7552723526048  | 11.78061512383797 |
| C  | 5.48728964157243  | 9.92026741159399  | 14.75450080465446 |
| H  | 5.64425015607853  | 10.99855512582302 | 14.81724813247514 |
| H  | 6.40006303379819  | 9.41078108171024  | 15.07248392648182 |
| H  | 4.69054972472637  | 9.65612874085542  | 15.44930574597422 |
| C  | 6.26507192280666  | 8.89014712711988  | 12.39247061821665 |
| H  | 6.03428162422989  | 9.73555280944714  | 11.34022370263674 |
| H  | 7.16215489903422  | 9.31717239478701  | 12.63230018448149 |
| H  | 6.51820441451711  | 10.94323619069560 | 12.51684549321220 |
| O  | 5.26005938861781  | 7.33058002879714  | 10.47267809101250 |

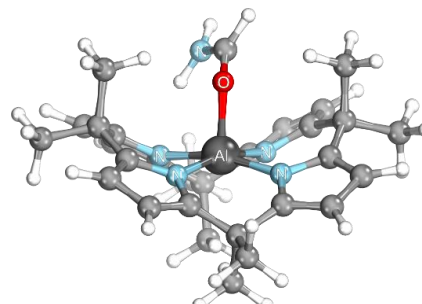**[1]-formamide sigma adduct isomer B**

|    |                   |                   |                    |
|----|-------------------|-------------------|--------------------|
| C  | 2.38163153880223  | 1.55864890471670  | 1.06676543327647   |
| C  | -3.48811410861692 | -1.14484470499599 | 0.07693315472836   |
| C  | -1.84657730000037 | 3.50683220839615  | -0.81324773066145  |
| C  | -4.14542678734606 | 0.71284373839658  | -1.57959637035134  |
| H  | -4.98756232622593 | 0.22607504234333  | -2.04656996041059  |
| C  | -2.71654474605256 | -2.20971271715206 | -0.73208007545662  |
| C  | -2.76023164982416 | -3.18210875612518 | -0.23517947480873  |
| C  | 2.34917728152091  | 0.39935187733320  | 3.37282954877792   |
| C  | 3.41598622570435  | 0.30801335301615  | 3.51390225846737   |
| C  | 1.35234575581371  | 0.09213710786748  | 4.32454707989550   |
| H  | 1.50623792111975  | -0.29538198228621 | 5.32025316302573   |
| H  | -1.67463963755205 | -1.93889263558842 | -0.87179410024307  |
| H  | -3.1581436844618  | -2.30901894385574 | -1.72583824710480  |
| C  | -1.20344830895821 | -0.24400342295398 | 5.71521028353430   |
| H  | -2.20765570327339 | -0.29259610420920 | 6.13860801690765   |
| H  | -0.59105113029768 | 0.37016880682729  | 6.37672313838579   |
| H  | -0.78864193176423 | -1.25298513014424 | 5.71174655309229   |
| C  | -4.96856083853543 | -1.55947206071347 | 0.04209638650498   |
| H  | -5.58554277396261 | -0.85872920949715 | 0.60245476979774   |
| C  | -2.07965338511857 | 4.46014704737438  | -1.98437049155249  |
| H  | -1.58021730428477 | 5.41403469663422  | -1.81077007331109  |
| H  | -3.14313184660453 | 4.66962497638509  | -2.10569066730858  |
| H  | -1.70323266485032 | 0.40001797375706  | -2.91701184104675  |
| H  | -5.10608581920690 | -2.55491434855448 | 0.46632352329937   |
| H  | -5.33658411065882 | -1.59932368986498 | -0.984343247207999 |
| C  | 3.5692215852013   | 2.40010075186551  | 1.59860366004026   |
| H  | 4.08808810528136  | 2.89284422465132  | 0.78360191797280   |
| H  | 4.28152229644009  | 1.77234729755344  | 2.11896713239439   |
| H  | 3.20582693182830  | 3.16275321503166  | 2.29175268041830   |
| C  | 2.99298869951216  | 0.51090117709126  | 0.10987230484032   |
| H  | 2.23029433869123  | 0.00275568245886  | -0.47480978346829  |
| H  | 3.58031724427887  | -0.22991925786647 | 0.65991795460844   |
| H  | 3.65423411667294  | 1.00558981841044  | -0.60429769273898  |
| N  | 0.35365676978044  | 0.91383163282292  | 2.48668215034286   |
| N  | -2.38033068371654 | 1.12153478117532  | -0.25601613888810  |
| N  | 0.10010923290239  | 2.28542048966805  | 0.18839963943982   |
| N  | -2.18284033368535 | -0.21218305144041 | 2.06956403845980   |
| C  | -0.37607485594757 | 3.27804012355860  | -0.62843676088648  |
| C  | -3.35502804289315 | 0.20715498297288  | -0.57412342654238  |
| C  | -2.07810250251229 | -0.4968629433926  | 3.40569054044630   |
| C  | 1.45777658079212  | 2.46568639519772  | 0.29470265755820   |
| C  | -1.23900846372350 | 0.35675597633315  | 4.31295312408581   |
| C  | -2.58780549100842 | 2.22201003855600  | -1.04512823663086  |
| C  | 0.15002517834651  | 0.43290976657067  | 3.74744626693353   |
| C  | -1.84528638917919 | 1.76800509353474  | 4.41825309033549   |
| H  | -1.90298751638036 | 2.26364997409140  | 3.44947641955260   |
| H  | -1.23609870432348 | 2.39768821638935  | 5.06974559825337   |
| H  | -2.85866818123942 | 1.71955354996465  | 4.82211025624307   |
| C  | -3.65738952930177 | 2.00265560625940  | -1.87824137645086  |
| H  | -4.06535532901309 | 2.69188385519319  | -2.60096460026196  |
| C  | 1.70885456693895  | 0.92709245520186  | 2.26907650373277   |
| C  | -3.05166356160517 | -1.12537529133959 | 1.52508468439050   |
| C  | 0.66388723213712  | 0.46801640199804  | -1.05451790639899  |
| H  | 0.59649393767148  | 4.93320640469676  | -1.69539682556861  |
| C  | -3.45993185562017 | -2.00579954046483 | 2.50531609079110   |
| H  | -4.14549978037188 | -2.83030216754758 | 2.38567604674917   |
| C  | 1.83595208283789  | 3.54621174384552  | -0.46828874928538  |
| H  | 2.83718689905924  | 3.92761109812036  | -0.59710815376967  |
| C  | 0.55432778615977  | -1.60021162030766 | 0.86530071680095   |
| C  | -2.83807924268141 | -1.60612779108800 | 3.70826146913931   |
| H  | -2.96810028134432 | -2.05219274832313 | 4.68248242649694   |
| Al | 0.92259379349465  | 0.8490338826705   | 0.98014476684319   |
| O  | -0.00681044220572 | -0.68086266795700 | 0.24716790247397   |
| C  | -2.41138340107240 | 4.18075591402289  | 0.45731233880144   |
| H  | -1.90090915158831 | 5.12694090735522  | 0.64950105412327   |
| H  | -2.27883132129378 | 3.55340812147186  | 1.34023935119807   |
| H  | -3.48171686093866 | 4.36895014364191  | 0.34893598608530   |
| H  | 1.47906052334809  | -2.01572804291219 | 0.45540649896375   |
| N  | 0.13273860260694  | -2.18684159040276 | 1.95879712114877   |
| H  | -0.66914983716392 | -1.84929624300494 | 2.49110339641652   |
| H  | 0.75510261701734  | -2.81426645908582 | 2.43473505935208   |

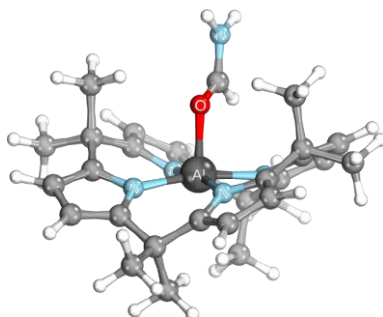**[1]-formamide sigma adduct isomer A**

|    |                   |                   |                   |
|----|-------------------|-------------------|-------------------|
| C  | 2.3845645960542   | 1.55920020664223  | 1.03417462584677  |
| C  | -3.45553274185325 | -1.13399776330940 | 0.02348726679979  |
| C  | -1.83859084173826 | 3.54069322727801  | -0.81085608390228 |
| C  | -4.15156313398933 | 0.75656614047667  | -1.57722652896733 |
| H  | -4.99461792847791 | 0.27139853944785  | -2.04439134827992 |
| C  | -2.71890562547591 | -2.16363814152297 | -0.86239148693468 |
| H  | -2.72241113668880 | -3.15209825794619 | -0.39572537740432 |
| C  | 2.36144129611416  | 0.46404990971555  | 3.36718584255158  |
| H  | 3.42889118519183  | 0.38378910211453  | 3.50836725952940  |
| C  | 1.36656117301069  | 0.12765284961730  | 4.31137103303793  |
| H  | 1.52368090190290  | -0.26498838164800 | 5.30435953094428  |
| H  | -1.69014446389940 | -1.87198444363128 | -1.05475468447325 |
| H  | -3.21485357572030 | -2.23827612023676 | -1.83253754226644 |
| C  | -1.18186061550882 | -0.31617581208761 | 5.67726591875624  |
| H  | -2.18816790260081 | -0.41326790566756 | 6.08740141398618  |
| H  | -0.60159406992288 | 0.30872088747047  | 6.35781325537414  |
| H  | -0.72756148571419 | -1.30747836360641 | 5.65688825571280  |
| C  | -4.93783319486840 | -1.54789881823727 | 0.02989916470678  |
| H  | -5.52873263451605 | -0.86837127787221 | 0.64194745364969  |
| C  | -2.08014043982154 | 4.50242479337162  | -1.97320631626246 |
| H  | -1.56908818534124 | 5.45066516678469  | -1.80198522258870 |
| H  | -3.14340720120808 | 4.72208286259569  | -2.07752430573428 |
| H  | -1.72180715054932 | 4.08375954434081  | -2.91358331067273 |
| H  | -5.05945944468692 | -2.55745516272494 | 0.42449605236423  |
| H  | -5.34904672660009 | -1.54897844812355 | -0.98013824188076 |
| C  | 3.59003028109637  | 2.38532311565578  | 1.51724932198629  |
| H  | 4.12376871222276  | 2.82942172916965  | 0.67618060156724  |
| H  | 4.30377480546618  | 1.75776444686485  | 2.05241389512806  |
| C  | 3.27118845249250  | 3.18490606955888  | 2.18396159112093  |
| C  | 2.95100817364322  | 0.45937814617730  | 0.10839819028310  |
| H  | 2.16328936200207  | -0.08118253536641 | -0.40922424479576 |
| H  | 3.55424961144455  | -0.25491338047010 | 0.67477742315947  |
| H  | 3.58260761073380  | 0.91191251430491  | -0.65902246049377 |
| N  | 0.35855237421626  | 0.93652225019633  | 2.47249833716206  |
| N  | -2.37490419654546 | 1.15377864619910  | -0.26664553888853 |
| N  | 0.10844961908032  | 2.30087123445242  | 0.16530317980545  |
| N  | -2.15788210145636 | -0.22504878620956 | 2.03658329912334  |
| O  | -0.36665076705102 | 3.29402184299442  | -0.64924186799402 |
| C  | -3.34769409204336 | 0.23894772129179  | -0.58806041689575 |
| C  | -2.02796901924669 | -0.55801961296269 | 3.35614786467941  |
| C  | 1.46936604580375  | 2.46492683389600  | 0.25160999485902  |
| C  | -1.22908549053632 | 0.30871210695268  | 4.28604469509306  |
| C  | -2.59322914624836 | 2.26320658941426  | -1.03946368066257 |
| C  | 0.15943863586510  | 0.44020016155028  | 3.73050497689723  |
| H  | -1.88373446911770 | 1.69633715727106  | 4.41304065583051  |
| H  | -1.95293583767903 | 2.20840353903353  | 3.45339739868744  |
| H  | -1.30170586969506 | 2.33447510075824  | 5.08119767309562  |
| H  | -2.89786412286883 | 1.60576872115321  | 4.80759339172263  |
| C  | -3.67193745882529 | 2.05249366445216  | -1.86301834189752 |
| H  | -4.08880180748623 | 2.74991429995570  | -2.57279198555870 |
| C  | 1.71548349675444  | 0.97575167010594  | 2.26085835258958  |
| C  | -2.96780721648971 | -1.17135001607278 | 1.45644674991501  |
| C  | 0.67607113950560  | 4.0634867491749   | -1.09939166348075 |
| H  | 0.60994829082503  | 4.92802390621454  | -1.74521397365456 |
| C  | -3.30896342008325 | -2.1163201509574  | 2.40155442705806  |
| H  | -3.95115123311487 | -2.97143584738809 | 2.25311493619321  |
| C  | 1.85037684860789  | 3.53349306672815  | -0.52658164007781 |
| H  | 2.85416931144432  | 3.90241208961748  | -0.67052893688454 |
| C  | 0.25149643202143  | -1.61846568581594 | 1.01417501198856  |
| C  | -2.71345671233231 | -1.72091443771027 | 3.61939637068319  |
| H  | -2.8049568436774  | -2.21519775539097 | 4.57447888724304  |
| Al | -0.92279243399113 | 0.88383295019330  | 0.97715757467937  |
| O  | -0.06120303312686 | -0.70041056748944 | 0.24700044779670  |
| C  | -2.37534224746030 | 4.2139823208412   | 0.47199596462794  |
| H  | -1.85119281164396 | 5.15328173672214  | 0.66104359109436  |
| H  | -2.23607851053847 | 3.58111303752183  | 1.35002889566241  |
| H  | -3.44503555975038 | 4.41479990025400  | 0.38162864633893  |
| H  | 0.06301123221374  | -1.57911251304222 | 2.09236157344068  |
| N  | 0.83854940272585  | -2.72139572052432 | 0.57971808085483  |
| H  | 1.08463902398866  | -3.45043636765913 | 1.22266097169766  |
| H  | 1.04950568671148  | -2.84048158650651 | -0.39735294465291 |

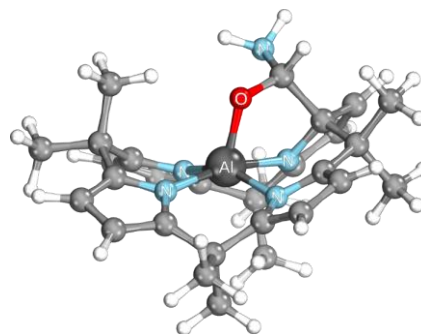**[1]-formamide 1,2 adduct isomer B**

|    |                   |                   |                    |
|----|-------------------|-------------------|--------------------|
| N  | -0.11234781266972 | -2.28130280317041 | 0.40125825645214   |
| C  | -0.42604510967756 | -3.43359982515670 | 1.06885526026885   |
| C  | 0.41955529215243  | -2.64681995290331 | -0.80619638149839  |
| C  | -0.09437412512652 | -4.52266863968508 | 0.29168201881412   |
| H  | -0.22458805375520 | -5.56266281491203 | 0.54697053331154   |
| C  | 0.44874362881895  | -0.01840368597728 | -0.90943158169418  |
| H  | 0.81978860333164  | -4.59922359972277 | -1.74031214271165  |
| N  | -0.18079149619369 | -1.13054551899052 | 2.86763219423316   |
| C  | 0.40105522486594  | -0.45099764931826 | 3.90313025084888   |
| C  | -0.49272548494051 | -2.38600254993711 | 3.31974242455032   |
| C  | 0.42855859651452  | -1.25431090773083 | 5.01876748580565   |
| C  | -0.14582374011932 | -2.49161818076136 | 4.64608988042597   |
| H  | -0.26980343220494 | -3.35646254608262 | 5.27941676222482   |
| N  | -0.02835867476072 | 1.33868027004785  | 1.51413649296365   |
| C  | -0.66803471803623 | 2.38604720198330  | 0.89548029532040   |
| C  | 0.33279964421490  | 1.76749943109432  | 2.75929804373548   |
| C  | -0.69908135368798 | 3.4692206546950   | 1.74444128810839   |
| H  | -1.11958401732015 | 4.44248364293510  | 1.53822121709383   |
| C  | -0.05277644923672 | 3.0756214585342   | 2.93676277845538   |
| H  | 0.09795602343988  | 3.68190300108972  | 3.81633437937556   |
| C  | -0.0404468065767  | -0.52189976283701 | -1.89625120893072  |
| C  | -1.47617335181264 | 0.99205065916903  | -1.09905623427936  |
| H  | 0.22910356407534  | -2.72670687310334 | 3.55161739606522   |
| C  | 1.15512987761600  | -2.29454995749112 | -3.17169575627064  |
| C  | 2.29700485982674  | -1.06346241802578 | -1.32923037182445  |
| C  | 0.95153854886362  | -1.64415734610800 | -1.80586675407362  |
| H  | 3.02733174171553  | -1.86839834353439 | -1.24266411798329  |
| H  | 1.89277240575833  | -3.09352774133574 | -3.10409710070111  |
| H  | 2.20644348995786  | -0.58961857472475 | -0.35255765564833  |
| H  | -2.84822680389552 | -2.22100477574524 | 1.85195310243220   |
| C  | -2.62064934452133 | -3.20107800304089 | 2.26424281213218   |
| C  | -0.92780223645185 | -4.80959417258893 | 3.06740279215471   |
| C  | -1.10286904273636 | -3.43275742240564 | 2.42173050545694   |
| H  | 0.12495823780166  | -0.50645437004522 | 3.20237313685650   |
| H  | -3.05190508862135 | -3.95938045339000 | 1.60528860026121   |
| H  | -1.38914295740860 | -5.58489021211703 | 2.45376504916147   |
| C  | 0.32935169409920  | 1.53841066002027  | 2.93276827175451   |
| C  | 2.49166058300785  | 0.60165964136288  | 3.08987559776007   |
| C  | 1.28537546521927  | 1.57360062099967  | 5.03947879614925   |
| C  | 1.09346097850758  | 0.87222327848444  | 3.69595146320906   |
| H  | 1.88235411722963  | 0.95889512926636  | 5.71398001738780   |
| H  | 2.42040008091499  | 0.08412770658240  | 2.14190425137497   |
| H  | 0.32820765576904  | 1.77471391901998  | 5.52056376511051   |
| C  | -1.10542413420933 | 2.40303345176430  | -0.55343499479431  |
| C  | -2.29681195118658 | 3.35083192436725  | -0.72794479395892  |
| C  | 0.06819875981400  | 2.95871534427240  | -1.38467470215985  |
| H  | -2.66874350529802 | 3.34747760326950  | -1.75549395286593  |
| H  | -0.19711392229836 | 3.11223676953833  | -2.43408182209994  |
| H  | -3.11928628209549 | 3.0985264492902   | -0.06054805327069  |
| H  | 0.93149595140169  | 2.29451604343805  | -1.34308708687130  |
| H  | -1.99915782971682 | 4.37532378601810  | -0.50474670756019  |
| H  | 0.37820748370112  | 3.91702845453363  | -0.96811289537307  |
| H  | 2.68346042525003  | -0.31699948898571 | -2.02879641039135  |
| H  | 1.52738986935732  | -1.56978330784086 | -3.89916745572877  |
| H  | -1.41615176272187 | -4.83852147289736 | 4.04229301065278   |
| H  | -3.11002385273490 | -3.26916579015913 | 3.23862444804174   |
| H  | 1.81210263812506  | 2.52034129734016  | 4.90785049932798   |
| H  | 3.07799967400592  | -0.02899920044268 | 3.77033955006196   |
| H  | 0.83787198798306  | -1.00287744403259 | 5.98524078905920   |
| Al | -0.55020788155650 | -0.49533787653962 | 1.10192946389512   |
| C  | -2.70352926921948 | 0.27726787392892  | -0.35145083622518  |
| O  | -2.30542622250163 | -0.15090408035981 | 0.87153714446424   |
| H  | -1.60018091668560 | 0.93705363488110  | -2.58141598183392  |
| H  | -2.28760386131903 | 1.53180017423376  | -3.16648864436295  |
| C  | -0.73955416083246 | 0.02581761326933  | -3.05362185138034  |
| H  | -0.60468004427442 | -0.28574062056749 | -4.07803424585416  |
| N  | -0.41350912018867 | 0.07025643154097  | -0.82630382106108  |
| H  | -3.50713184967213 | 1.02956155815490  | -0.26311585983538  |
| N  | -3.12493518779381 | -0.85612069660196 | -1.15912214757721  |
| H  | -3.46268974356751 | -1.57659298716540 | -0.539271334405138 |
| H  | -3.86844363153188 | -0.61119431260396 | -1.79925206046571  |

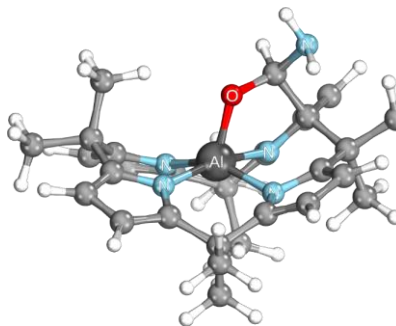**[1]-formamide 1,2 adduct isomer A**

|    |                   |                   |                   |
|----|-------------------|-------------------|-------------------|
| N  | -0.06110927569263 | -2.30861188915900 | 0.37232918740926  |
| C  | -0.30029619638952 | -3.47684037101050 | 1.04344469697501  |
| C  | 0.44129884125975  | -2.6507366054303  | -0.85691895917465 |
| C  | 0.05601608069110  | -4.54875963251892 | 0.25360823891435  |
| H  | -0.02162582173970 | -5.59380833465797 | 0.50893498564950  |
| C  | 0.53040328778521  | -4.01935288127146 | -0.96450553877954 |
| H  | 0.89570122010757  | -4.58124926734828 | -1.81079099065933 |
| N  | -0.16424392329521 | -1.16850173162657 | 2.86537063733364  |
| C  | 0.34500532118236  | -0.46399832187719 | 3.92252924368071  |
| C  | -0.41566847389720 | -2.44328081459293 | 3.30344119254438  |
| C  | 0.39345825626078  | -1.27292610308909 | 5.03262140108272  |
| C  | -0.09552158053914 | -2.53868018073421 | 4.63692307630540  |
| H  | -0.18583106465759 | -3.41365395657213 | 5.26173868667482  |
| N  | -0.07923918901343 | 1.33468700348896  | 1.51235876466059  |
| C  | -0.72006197344210 | 2.37098565524723  | 0.86755708245915  |
| C  | 0.15809256083415  | 1.75510959363241  | 2.7914742898880   |
| C  | -0.89761169124229 | 3.42106880624846  | 1.73779481149397  |
| H  | -1.34908513355753 | 3.47608590235973  | 1.51469449121108  |
| C  | -0.32931310246485 | 3.02856052951833  | 2.97110775163780  |
| H  | -0.28296826371123 | 3.61814373503244  | 3.87322300491341  |
| C  | -0.17414859596586 | -0.55602810911208 | -1.92173715694334 |
| C  | -1.5556652292076  | 0.98261742000626  | -1.05792657428593 |
| H  | 0.11031341025361  | -2.75186024382498 | -3.59120991244211 |
| C  | 1.03271941634285  | -2.27390280228797 | -3.26016627319192 |
| C  | 2.21261573280891  | -0.98452826869111 | -1.48324009172321 |
| C  | 0.87261711058684  | -1.63039009527301 | -1.88527626196332 |
| H  | 2.98589316672663  | -1.75242767652868 | -1.44949771867751 |
| H  | 1.81012260445138  | -3.0365793052239  | -3.23290971404714 |
| H  | 2.15567930844604  | -0.52754340028390 | -0.49591359586715 |
| H  | -2.76724972012961 | -2.40299250529495 | 1.79130200347255  |
| C  | -2.49472986136300 | -3.35730695684432 | 2.23587655238491  |
| C  | -0.72373704082985 | -4.88358823270833 | 3.03916897447782  |
| C  | -0.96755550741415 | -3.51481704298677 | 2.39856193919738  |
| H  | 0.33979361089308  | -5.07659297075829 | 3.17847833405066  |
| H  | -2.88899276104784 | -4.15167561634834 | 1.59706444683403  |
| H  | -1.14222178894350 | -5.67899442038051 | 2.42091781505010  |
| H  | 2.84812461290914  | 1.72918325782938  | 3.06701295138248  |
| C  | 2.37864259387878  | 0.75226832200199  | 3.20671613494428  |
| C  | 1.02895092411972  | 1.60680581569287  | 5.10834858054367  |
| C  | 0.9426068579092   | 0.90765289973452  | 3.75259373577747  |
| H  | 1.64448447493540  | 1.03101527502758  | 5.80005074356364  |
| H  | 2.38210152924880  | 0.23954745906358  | 2.24470867850220  |
| H  | 0.04188709818513  | 1.72888815393456  | 5.55433350713801  |
| C  | -0.96967611081543 | 2.36990352264602  | -0.61829409392482 |
| C  | -1.87904880795987 | 3.52280086927036  | -1.05538737804575 |
| C  | 0.38882762309130  | 2.61159752668819  | -1.30998878353224 |
| H  | -1.90802172760860 | 3.58709263663964  | -2.14530921757113 |
| H  | 0.32012473673721  | 2.55327032995814  | -2.39936819369706 |
| H  | -2.90058749905720 | 3.42123557182410  | -0.70300879153209 |
| H  | 1.15444496858079  | 1.91846027305483  | -0.96902019527793 |
| H  | -1.47282564374916 | 4.46854768156356  | -0.69632492951176 |
| H  | 0.72896103948515  | 3.61461986684462  | -1.04975288945036 |
| H  | 2.51922399277506  | -0.21278197212197 | -2.19463932384793 |
| H  | 1.33001640110260  | -1.53371139642376 | -4.00629173253959 |
| H  | -1.21469737247660 | -4.94240117190340 | 4.01124345988439  |
| H  | -2.98054249711867 | -3.42253982303918 | 3.21227540890188  |
| H  | 1.48732855129109  | 2.59190161496817  | 5.00608631036741  |
| H  | 2.98602935749328  | 0.16341036316275  | 3.89687361065938  |
| H  | 0.76016325449520  | -1.00472988517012 | 6.01152811140236  |
| Al | -0.55930450304207 | -0.53837177379856 | 1.10498073453749  |
| C  | -2.77188285784100 | 0.38747552468414  | -0.21060036279818 |
| O  | -2.31558494250074 | -0.28224741356758 | 0.89295098702562  |
| C  | -1.79386425222774 | 0.88373113678814  | -2.52513031392028 |
| C  | -2.53722581667966 | 1.45790997937853  | -3.05807553598825 |
| C  | -0.9586606224539  | -0.03190228044878 | -3.03947581153151 |
| H  | -0.88852119730807 | -0.35721411189329 | -4.06624078730941 |
| N  | -0.51327077419423 | 0.01910722741266  | -0.83352848126483 |
| H  | -3.26948762366001 | -0.31375293004982 | -0.90101498264231 |
| N  | -3.74616771577770 | 1.40970125768742  | 0.08618381461073  |
| H  | -4.56018501391083 | 0.94800353187432  | 0.47378130346173  |
| H  | -3.37388843422480 | 1.97656242999941  | 0.84357391107371  |

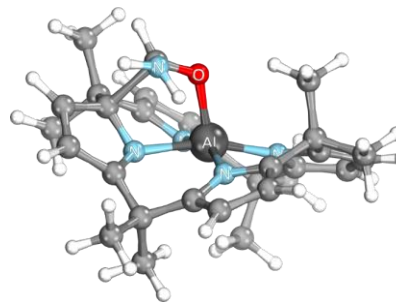**[1]-formamide TS2 isomer B**

|    |                   |                   |                   |
|----|-------------------|-------------------|-------------------|
| N  | -0.16987802279416 | -2.26191593859245 | 0.38595839741533  |
| C  | -0.55365336407633 | -3.39432190386946 | 1.05793521224365  |
| C  | 0.33450724274939  | -2.66357188373554 | -0.82499071998181 |
| C  | -0.30746928038705 | -4.49974451422145 | 0.27306993733499  |
| H  | -0.50610639108559 | -5.52872919763460 | 0.52807019478533  |
| C  | 0.26039861600170  | -4.03260351850385 | -0.93188206993946 |
| H  | 0.59039207652509  | -4.63580514673745 | -1.76405218643886 |
| N  | -0.16034060011355 | -1.09873189741933 | 2.84664364183235  |
| C  | 0.43553322118739  | -0.43178543179198 | 3.88387324175515  |
| C  | -0.52782982696805 | -2.33681398602189 | 3.30751290490398  |
| C  | 0.42407153805666  | -1.22661035955273 | 5.00479662344157  |
| C  | -0.19421994993909 | -2.44389774960402 | 4.63692658272628  |
| H  | -0.35931675950231 | -3.2960320293863  | 5.27776688337757  |
| N  | -0.03986294967737 | 1.37170874647806  | 1.54440206000946  |
| C  | -0.64821136623810 | 2.43594909342711  | 0.93009758003834  |
| C  | 0.38803847908853  | 1.79667041421051  | 2.76932884305656  |
| C  | -0.59889900505412 | 3.53045407654986  | 1.76436378118337  |
| H  | -0.98196133125980 | 4.51889840188152  | 1.55470279708366  |
| C  | 0.07003539913084  | 3.12341211033809  | 2.93977426667040  |
| H  | 0.26328678082780  | 3.73470862414298  | 3.80283052299569  |
| C  | 0.03411928842947  | -0.50977581555770 | -1.91689156100518 |
| C  | -1.29203629849478 | 1.08680321707855  | -1.16377132400148 |
| H  | 0.20295511184216  | -2.73541698092590 | -3.56834654966251 |
| C  | 1.14244014788788  | -2.35334368484739 | -3.16740753272742 |
| C  | 2.3218535716974   | -1.21593442727780 | -1.29558681077646 |
| C  | 0.94878699782394  | -1.69380929926972 | -1.80466816301020 |
| H  | 2.99189367812939  | -2.07036648891691 | -1.19346791587098 |
| H  | 1.83530964481646  | -3.19084082885210 | -0.98899081543633 |
| H  | 2.24717499482277  | -0.7585238853384  | -0.32068875029274 |
| H  | -2.92512022314692 | -2.11820340719585 | 1.87244064466122  |
| H  | -2.70947683787826 | -3.08927083441611 | 2.30947987244645  |
| C  | -1.04529626858122 | -4.74390761618356 | 3.07410375726673  |
| C  | -1.19538304148027 | -3.36360374739842 | 2.42697676498894  |
| H  | 0.00237040953504  | -5.0228925616131  | 3.18477789471507  |
| H  | -3.18404958932684 | -3.85173344819349 | 1.68656824927305  |
| H  | -1.54602413120480 | -5.50759413737443 | 2.47722029867750  |
| H  | 3.08723320099520  | 1.51577287986886  | 2.88784363056155  |
| C  | 2.53387749749332  | 0.58766469034855  | 3.04976436040302  |
| C  | 1.38682890259125  | 1.55918916068175  | 5.02498602305629  |
| C  | 1.15337656136667  | 0.87739114132426  | 3.67826852424952  |
| H  | 1.98465685798354  | 0.92524706624799  | 5.68081323019244  |
| H  | 2.43575859271141  | 0.08855571442066  | 2.08498032971704  |
| H  | 0.44381281124183  | 1.77559509973416  | 5.52685331211649  |
| C  | -1.17737333443907 | 2.46352793522048  | -0.48935732621680 |
| C  | -2.53010569298144 | 3.18443648408929  | -0.52360755748418 |
| C  | -0.16962953094054 | 3.2837958844286   | -1.32532543873083 |
| H  | -2.97782396455986 | 3.15988718452091  | -1.52148505380345 |
| H  | -0.52627340828620 | 3.45325918192453  | -2.34485318542027 |
| H  | -3.23330323742423 | 2.75208920979310  | 0.18621674687920  |
| H  | 0.78877925532834  | 2.76651272326996  | -1.38147166206164 |
| H  | -2.40780778938263 | 4.23373787256344  | -0.25468935111293 |
| H  | 0.00624412482286  | 4.25322971670523  | -0.85826430844814 |
| H  | 2.77301708623653  | -0.49811640252231 | -1.98524484684435 |
| H  | 1.56345697921441  | -1.64627982875138 | -3.88504315958952 |
| H  | -1.51087904499750 | -4.75425203235551 | 4.06021929635836  |
| H  | -3.16809441754114 | -3.11661883967430 | 3.30043362929354  |
| H  | 1.93040081408621  | 2.49608899250598  | 4.89227298505957  |
| H  | 3.12028080306015  | -0.06612927047993 | 3.69865866838868  |
| H  | 0.83109821555404  | -0.98160573606025 | 5.97376284004346  |
| Al | -0.4954183687253  | -0.4450952338111  | 1.08342025318121  |
| O  | -2.68312243026447 | 0.04991378627439  | -0.40553253746996 |
| O  | -2.27957891417478 | -0.14354689781714 | 0.83137503043923  |
| C  | -1.44521298881441 | 1.02267980858606  | -2.59622512450606 |
| H  | -2.10355638932779 | 1.64788105542612  | -3.18328560321108 |
| C  | -0.66044895321908 | 0.01109361033838  | -3.05863725432844 |
| H  | -0.58649595200296 | -0.35687838447975 | -4.07060365466534 |
| N  | -0.28169173553730 | 0.16333665433559  | -0.84752099342352 |
| H  | -3.50775760621326 | 0.75929754732568  | -0.53223184603651 |
| N  | -2.91013849358610 | -1.11192297555177 | -1.13565552218551 |
| H  | -2.26364188436206 | -1.86692846508225 | -0.94547591364221 |
| H  | -3.06036420825580 | -0.98501575017506 | -2.12240207180710 |

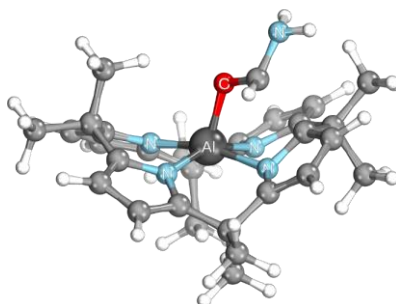**[1]-formamide TS2 isomer A**

|    |                   |                   |                   |
|----|-------------------|-------------------|-------------------|
| C  | 2.47224127276106  | 1.79739668887793  | 1.20677372275113  |
| C  | -3.30512421271828 | -1.17711849511992 | 0.17249213324449  |
| C  | -1.75459823630022 | 3.45300012609422  | -0.90761224413119 |
| C  | -3.53034774104723 | 0.34497618828170  | -1.87822361682701 |
| H  | -4.16898518073861 | -0.28926407147895 | -2.47528758206176 |
| C  | -3.58088147156249 | -2.38290035644375 | -0.72974885565308 |
| H  | -3.77982740356193 | -3.28465248149445 | -0.14632029499084 |
| C  | 2.32520450017851  | 1.27584564773926  | 3.7350524200967   |
| H  | 3.33776167020297  | 1.5182212478731   | 4.01713896115493  |
| C  | 1.31383972563827  | 0.79113801013586  | 4.59140244505041  |
| H  | 1.401817100165960 | 0.60238097420733  | 5.65048410164858  |
| H  | -2.76127791389368 | -2.58725299214525 | -1.41457901784895 |
| H  | -4.46706023747492 | -2.20148450400354 | -1.33794253666201 |
| C  | -1.11454621839158 | -0.45641919328842 | 5.64525624686686  |
| H  | -2.10407239109001 | -0.79130321030075 | 5.96343039514870  |
| H  | -0.75818181296979 | 0.25914164725558  | 6.38596162606275  |
| H  | -0.43809259570344 | -1.31146489913533 | 5.65593814029048  |
| C  | -4.61510116149406 | -0.86208703799718 | 0.93239710037751  |
| H  | -4.47377682391209 | -0.01928418634667 | 1.60824258341576  |
| C  | -1.99819837100782 | 4.34661993930145  | -2.12213419264690 |
| H  | -1.60166164152604 | 5.34788038952749  | -1.95016921275802 |
| H  | -3.06731099428325 | 4.44656516128791  | -2.31721741692411 |
| H  | -1.52069353835491 | 3.94095416337701  | -3.01406333791645 |
| H  | -4.95813015650093 | -1.71865021341969 | 1.51930077330367  |
| H  | -5.39856521127534 | -0.58915549764813 | 0.22379765122097  |
| C  | 3.72168295857918  | 2.60582302749197  | 1.57025153506691  |
| H  | 4.25523988359020  | 2.90943015835344  | 0.66882375190394  |
| H  | 4.41257996223221  | 2.00349003615599  | 2.16165621308056  |
| C  | 3.46816025132338  | 3.50021905601191  | 2.13870684798401  |
| C  | 2.95720323851891  | 0.56049120349377  | 0.42154596470955  |
| H  | 2.13703235590442  | -0.07428030965728 | 0.09843976112279  |
| H  | 3.62543527708525  | -0.04161718738963 | 1.04218290008514  |
| H  | 3.50293738324827  | 0.87741908301964  | -0.47020279816608 |
| N  | 0.46238807724363  | 0.97472292713141  | 2.51672385161518  |
| N  | -2.25113589477635 | 1.11532679637374  | -0.19916788670212 |
| N  | 0.23725037148524  | 2.37037111627357  | 0.17654943883627  |
| N  | -1.84985449817825 | -0.40033537456177 | 2.00839849192205  |
| C  | -0.27810485067363 | 3.34256856205660  | -0.63976691778513 |
| C  | -2.97367208662216 | 0.03850716699547  | -0.65785175727892 |
| C  | -1.72115510032747 | -0.77100718411210 | 3.25463181587450  |
| H  | 1.56863144352533  | 2.65123482104758  | 0.35544022990271  |
| C  | -1.17811028863459 | 0.19367990950503  | 4.26563695982661  |
| C  | -2.36892288212308 | 2.10279679933885  | -1.13653675581513 |
| C  | 0.19403309434067  | 0.62099447812025  | 3.81353936129953  |
| C  | -2.12127690095745 | 1.40969915547945  | 4.34470086078549  |
| C  | -2.20027539426928 | 1.92281804663765  | 3.38689475192205  |
| H  | -1.73460556880368 | 2.12484137788990  | 5.07169280901927  |
| H  | -3.12887207164380 | 1.11329022985295  | 4.64760420814038  |
| C  | -3.14815222177792 | 1.67083878820492  | -2.18270832716268 |
| C  | -3.41680972698639 | 2.23206450317007  | -3.06402070664665 |
| C  | 1.77323573769302  | 1.37794795663138  | 2.47816459477182  |
| C  | -2.25517089906095 | -1.50453562283940 | 1.23750480079889  |
| C  | 0.71566800185271  | 4.22134792418475  | -0.9950188015046  |
| H  | 0.61156860105156  | 5.09436612568168  | -1.6207787685981  |
| C  | -2.48698906640806 | -2.57101613172290 | 2.17368221551105  |
| H  | -2.85935739063704 | -3.55573321886398 | 1.92744826240863  |
| C  | 1.89801063241967  | 3.77714144175760  | -0.36070576150996 |
| H  | 2.86974945151210  | 4.24186672193358  | -0.42172683140177 |
| C  | -0.46561991528654 | -1.80751416939373 | 0.56703708206932  |
| C  | -2.11504981200104 | -2.13560908810113 | 3.41213985685558  |
| H  | -0.09114936773561 | -2.70284064134674 | 4.32962309336988  |
| Al | -0.67186593994166 | 0.85295279178222  | 0.91522989472962  |
| O  | -0.10359038664218 | -0.66486591690334 | 0.05785321816561  |
| C  | -2.43649428894845 | 4.11413812261882  | 0.3092517897819   |
| H  | -2.01888571802395 | 5.10733597126322  | 0.48634044976544  |
| H  | -2.28855139690153 | 3.52958695213450  | 1.21782180423896  |
| H  | -3.51307030147369 | 4.20657245968799  | 0.14680377369831  |
| H  | -0.07363054517061 | -2.07207719528922 | 1.56154254451881  |
| N  | -0.37090263144027 | -2.87371565571069 | -0.32017165617447 |
| H  | -0.81321475670942 | -3.72134019821778 | -0.00598546632131 |
| H  | -0.64443213103367 | -2.62836939604483 | -1.25973582212825 |

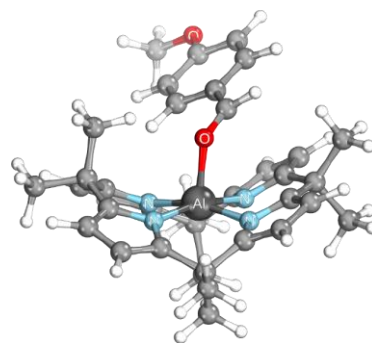**[1]-p-methoxybenzaldehyde sigma adduct isomer B**

|    |                   |                    |                   |
|----|-------------------|--------------------|-------------------|
| N  | -0.48440417470434 | -2.56743874034131  | 1.24291712479676  |
| C  | -1.06246483962723 | -3.47320451933633  | 2.10435207173698  |
| C  | -0.02780484196532 | -3.28249228427997  | 0.16707581877610  |
| C  | -0.97707450203502 | -4.73853801117063  | 1.56588409683308  |
| H  | -1.33190521833681 | -5.65320261965417  | 2.01414248962545  |
| C  | -0.30810821496551 | -4.617774791575931 | 0.32978919731877  |
| H  | -0.05428209887761 | -5.41785276993501  | -0.34846045649022 |
| N  | -0.53466329931998 | -0.86486079097831  | 3.35739817600189  |
| C  | 0.01689603272516  | -0.01482809353227  | 4.28227538881070  |
| C  | -1.02368677571072 | -1.94306122154583  | 4.05779192325492  |
| C  | -0.13284144332286 | -0.52935561551511  | 5.54510666274713  |
| C  | -0.80224532634557 | -1.76268418192220  | 5.40159485957870  |
| H  | -1.07857976348757 | -2.43619837816249  | 6.19751875183504  |
| C  | -0.11396094106269 | -1.40583016538564  | -1.40559728597815 |
| C  | -0.90403850173230 | 0.63744948681454   | -1.21590780088274 |
| H  | -0.21702486370713 | -3.93240897317761  | -2.4927882942715  |
| C  | 0.76684067089531  | -3.59397940195289  | -2.16390457417215 |
| C  | 2.08536889343237  | -2.20098986506435  | -0.58841655201982 |
| C  | 0.65766825314298  | -2.62260529522143  | -0.99100877984681 |
| H  | 2.66919098063980  | -3.07670745954128  | -0.29828787172034 |
| H  | 1.35356534171698  | -4.47027474858005  | -1.8860900653866  |
| H  | 0.08108910247567  | -1.51318660777561  | 0.25690756250223  |
| H  | -3.69316532834422 | -2.62229788718347  | 4.18381913850233  |
| C  | -3.22229463576935 | -2.80355348545107  | 3.21526212586769  |
| C  | -1.64661906891259 | -4.31672271863747  | 4.3510577276645   |
| C  | -1.72109411409230 | -3.10643584062033  | 3.41084083707240  |
| H  | -0.61476354252263 | -4.60886080816666  | 4.54193142770354  |
| H  | -3.38889639477215 | -1.92166614253102  | 2.60492988554391  |
| H  | -2.17615056434618 | -5.17112079714357  | 3.92816638386759  |
| H  | 1.50567473744181  | 3.03684978542701   | 4.78968792471758  |
| C  | 0.95193651191785  | 2.14163598549762   | 5.07718791410290  |
| C  | 2.18196462176595  | 0.80782652513506   | 3.38725967795024  |
| C  | 0.77554305565832  | 1.21333925163724   | 3.87740525375184  |
| H  | 2.75212754342532  | 1.68723049461083   | 3.07905470312883  |
| H  | 1.51615057724289  | 1.64711918220125   | 5.86876583079701  |
| H  | 2.13383309313929  | 0.13282914517138   | 2.53202169036173  |
| C  | -0.86782371608674 | 2.06811519215174   | -0.74326127060175 |
| C  | -2.07404312016852 | 2.85396375601829   | -1.26985105079025 |
| C  | 0.40571108710747  | 2.68739286092273   | -1.37607151899150 |
| C  | -3.00588421005113 | 2.53179384977857   | -0.80535619832908 |
| H  | 0.51322059921893  | 3.73272152630386   | -1.08064355534595 |
| H  | -1.36383386108796 | 3.918344498655668  | -1.06074950460606 |
| H  | 0.37132532405676  | 2.62665917988858   | -2.4662530818952  |
| H  | -2.17648896392218 | 2.74788441092034   | -2.35105137869075 |
| H  | 1.28965440222441  | 2.14889524389344   | -1.03515848907728 |
| H  | 2.59036808796219  | -1.70008671939080  | -1.41723751212369 |
| H  | 1.26469132978824  | -3.11714901889284  | -3.0094531550877  |
| H  | -2.12433196818024 | -4.09183930703518  | 5.30547197140667  |
| H  | -3.72469446071334 | -3.64873937590498  | 2.73777000395832  |
| H  | 2.72730653112267  | 0.29305927739145   | 4.18096053109524  |
| H  | -0.01073746400812 | 2.44807595217895   | 5.48655183452355  |
| H  | 0.2088080176566   | -0.0846383991774   | 6.4682630137614   |
| C  | -1.11051918277142 | 0.24107006734816   | -2.52833495072267 |
| H  | -1.52992810705868 | 0.84374232563378   | -3.32064091154826 |
| C  | -0.60461237054463 | -1.06034360636543  | -2.65270705957971 |
| H  | -0.60143484282920 | -1.67269711804004  | -3.54057421600519 |
| N  | -0.31207934264494 | -0.39202930908374  | -0.52325053006847 |
| C  | 0.05939130177200  | 1.93078206081482   | 2.77582954698685  |
| C  | -0.30909501425555 | 3.25068803686541   | 2.70091492483264  |
| H  | -0.20887771073199 | 3.99423452771782   | 3.47609680891403  |
| C  | -0.82712927842374 | 3.44812408144353   | 1.40229439795559  |
| H  | -1.16857924824878 | 4.38343149179236   | 0.9834695643837   |
| C  | -0.73491809908369 | 2.24308823596493   | 0.74598103230689  |
| N  | -0.21585764815420 | 1.29346185953100   | 1.59619457877862  |
| C  | -3.15910674633902 | -0.28909779112271  | 0.06820503114138  |
| Al | -0.62671521363790 | -0.60731854739601  | 1.43131917242844  |
| O  | -2.52227021556719 | -0.39201653886790  | 1.12444019245769  |
| H  | 3.64870645692179  | 0.69390794520024   | -0.12436737641434 |
| C  | -3.44164937584366 | -1.31190092329044  | -0.88019448305266 |
| C  | -3.9799574297421  | -3.24783442737443  | -2.80982117430035 |
| C  | -4.13816064310455 | -0.97984221086872  | -2.05134654461019 |
| C  | -3.03471734502740 | -2.6308529286922   | -0.69123513374072 |
| C  | -3.30563193814116 | -3.59677611082193  | -1.64647882624176 |
| C  | -4.40850860822618 | -1.92558482929793  | -3.00436670748805 |
| H  | -4.43744024377973 | 0.04836698261089   | -2.21676097942122 |
| H  | -2.53773299144875 | -2.93016717039973  | 0.21905391690908  |
| H  | -2.95757203744366 | -4.60216488245492  | -1.45649435602849 |
| H  | -4.93073485905079 | -1.66874773319092  | -3.9163677846594  |
| O  | -4.26845697323899 | -4.10673610391563  | -3.80163223904953 |
| C  | -3.79551997735871 | -5.42604217087792  | -3.69871475511805 |
| H  | -2.70549173477529 | -5.46638852188740  | -3.61343715634152 |
| H  | -0.09440772011069 | -5.93460283885403  | -4.61298063965800 |
| H  | -4.22970898471868 | -5.95596680064743  | -2.84557760570298 |

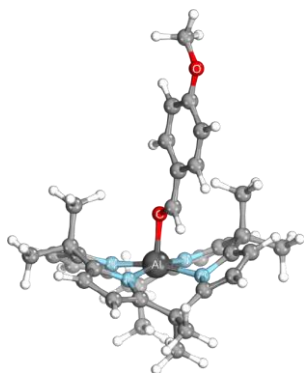

**[1]-*p*-methoxybenzaldehyde sigma adduct isomer A**

|    |                    |                   |                   |
|----|--------------------|-------------------|-------------------|
| N  | -1.20682540986015  | -2.26110303489631 | 0.93850897740424  |
| C  | -2.18314638453504  | -2.88763779220617 | 1.67255615175076  |
| C  | -1.17237863450927  | -2.86445764487424 | -0.28622194462892 |
| C  | -2.79730611438117  | -3.84643393656676 | 0.88933416513388  |
| H  | -3.58206758818897  | -4.52019111273975 | 1.20124924582551  |
| C  | -2.14233628150832  | -3.84055008678130 | -0.36209648340151 |
| H  | -2.33853666213680  | -4.49294625200283 | -1.19908952859193 |
| N  | -0.71239516630807  | -0.77417688025601 | 3.12011493870751  |
| C  | 0.05732422657212   | -0.13117011768693 | 4.05259249950519  |
| C  | -1.43535384350005  | -1.73288013033766 | 3.78689521805589  |
| C  | -0.18803619506952  | -0.65036367078712 | 5.30020179340065  |
| C  | -1.14584051098460  | -1.67165588619646 | 5.13043274599148  |
| H  | -1.56831904739577  | -2.28837529677499 | 5.90921827854583  |
| C  | -0.42637507975514  | -0.99158059556324 | -1.65630721281374 |
| C  | -0.76221971593167  | 1.16285571205659  | -1.31565329487508 |
| H  | -1.26139014776916  | -3.21095763264726 | -3.02185873479358 |
| C  | -0.27890394985553  | -3.30129651410080 | -2.55751329033309 |
| C  | 1.25779280836842   | -2.59193675059011 | -0.74568757620786 |
| O  | -0.16650968725172  | -2.42971547474865 | -1.30948404324154 |
| H  | 1.45372915217773   | -3.63319381613811 | -0.48038604019079 |
| H  | -0.11184685154114  | -4.35036603311446 | -2.30776673778700 |
| H  | 1.41491543651138   | -1.99328363733744 | 0.15157304303766  |
| H  | -4.07146303920106  | -2.19892657080638 | 4.48876705099920  |
| C  | -3.86291059282198  | -2.16585447468927 | 3.41773768585803  |
| C  | -2.29906041700987  | -4.04646746143868 | 3.82776364979795  |
| C  | -2.42956198380742  | -2.66778205525604 | 3.14843240974656  |
| H  | -1.30512168488215  | -4.46114880167364 | 3.66615416406532  |
| H  | -3.99739430485636  | -1.13366315990463 | 3.10278079502771  |
| H  | -3.03046444741895  | -4.74899089885393 | 3.42553360006059  |
| H  | 2.42680809853869   | 2.29005225382114  | 4.60661613703602  |
| C  | 1.62987409697630   | 1.59754153518226  | 4.88034360672644  |
| C  | 2.30770891734477   | 0.08463221733192  | 3.03705019980405  |
| C  | 1.11558008706358   | 0.85294478409761  | 3.64963566517325  |
| H  | 3.09887031846172   | 0.77653344980761  | 2.74048623672030  |
| H  | 2.04346173933447   | 0.89882461270286  | 5.60869524528689  |
| H  | 2.01559548733462   | -0.47539425936859 | 2.14717763985536  |
| C  | -0.96333057331590  | 2.48404954084996  | -0.60893127386445 |
| C  | -2.46067161503968  | 2.82001078657757  | -0.42987398243424 |
| C  | -0.38407561333243  | 3.59366637726352  | -1.5004406328317  |
| H  | -2.94617962952342  | 2.17154918646863  | 0.29244616803845  |
| H  | -0.50713660705745  | 4.57049425475394  | -1.03149179329973 |
| H  | -2.56873522121558  | 3.84315636987859  | 0.06278851896982  |
| H  | -0.90525961967927  | 3.63508557683557  | -2.45731952217659 |
| H  | -2.99171644279281  | 2.73396551258241  | -1.38079470256299 |
| H  | 0.67590563384317   | 3.43310952757329  | -1.69066795790195 |
| H  | 1.99455001785924   | -2.27245859567007 | -1.48511950139653 |
| H  | 0.46947354425333   | -3.01198529009042 | -3.29639087294124 |
| H  | -2.46973119636643  | -3.97635218695739 | 4.90284504289134  |
| H  | -4.60522373663136  | -2.78310666000288 | 2.90468102404380  |
| H  | 2.71220463071856   | -0.63213600070735 | 3.75497898213457  |
| H  | 0.83276726287692   | 2.16402206388578  | 5.36180765703383  |
| H  | 0.27737331848660   | -0.35218163571491 | 6.22665263083118  |
| C  | -0.69982801923485  | 0.97194516872762  | -2.67798121832368 |
| H  | -0.78133917632532  | 1.73189156012927  | -3.43935482971424 |
| C  | -0.48124840212639  | -0.40485191659962 | -2.89631857522742 |
| H  | -0.36370204986088  | -0.89691954999605 | -3.84951426949035 |
| N  | -0.60819915289834  | -0.04799967101412 | -0.68031121519058 |
| C  | 0.59694395589437   | 1.83263394428510  | 2.63822473850835  |
| C  | 0.86597004381742   | 3.17533615730749  | 2.54512677219524  |
| H  | 1.41408453313906   | 3.77460420760789  | 3.25532546357766  |
| C  | 0.31812013691304   | 3.61361911652251  | 1.32021545720897  |
| H  | 0.35748454933580   | 4.61749552488815  | 0.92702343549505  |
| C  | -0.25372137795799  | 2.51707164159144  | 0.71967001013846  |
| N  | -0.10503899615241  | 1.42040859962776  | 1.53530062705755  |
| C  | -3.50286190455055  | -0.63058684595607 | 0.41185961111408  |
| Al | -0.85390786100619  | -0.33472917698582 | 1.24094676429682  |
| O  | -2.78364254002114  | 0.03132307687244  | 1.16228302312890  |
| H  | -3.07284803138388  | -1.35055357730077 | -0.25835318173334 |
| C  | -4.93971080605702  | -0.45999696018689 | 0.37707895574253  |
| C  | -7.70784046869051  | -0.20602844703294 | 0.26619592246464  |
| C  | -5.69632022800721  | -1.31105469852572 | -0.43142557563914 |
| C  | -5.86380706024869  | 0.51571250011746  | 1.13113738649114  |
| C  | -6.96006396917709  | 0.64988605499446  | 1.07838740379764  |
| C  | -7.06591202639625  | -1.19099590782386 | -0.48902500672955 |
| H  | -5.19179442569139  | -2.08082207699979 | -1.00296734088282 |
| H  | -5.00538019184056  | 1.17522158807735  | 1.76237948043311  |
| H  | -7.43312608069610  | 1.41909188603386  | 1.67248567654663  |
| H  | -7.65815404992096  | -1.85054444764192 | -1.10898984095781 |
| O  | -9.04396691774059  | -0.15532464197336 | 0.15122656020830  |
| C  | -9.75272820110984  | 0.80726130168063  | 0.88988676093411  |
| H  | -9.62105126518462  | 0.67968586192089  | 1.96852450156906  |
| H  | -10.80434396517018 | 0.66731466619713  | 0.65007068897667  |
| H  | -9.46661211775787  | 1.82831189943207  | 0.62016119832188  |

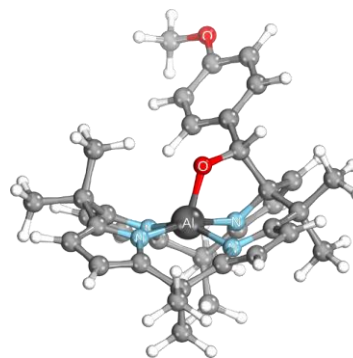

**[1]-*p*-methoxybenzaldehyde 1,2 adduct isomer B**

|    |                   |                   |                   |
|----|-------------------|-------------------|-------------------|
| N  | -0.77802749474756 | -2.77464952195449 | 0.82884415951673  |
| C  | -0.96407689610549 | -3.90194283899606 | 1.58324350292665  |
| C  | -0.29672014221840 | -3.17783013972069 | -0.38901108502340 |
| C  | -0.61118195760677 | -5.01278841126647 | 0.84532363705978  |
| H  | -0.64690975071346 | -6.04104295687369 | 1.16922780557379  |
| C  | -0.18321082637045 | -4.54889209570469 | -0.41718834978015 |
| H  | 0.17744304498872  | -5.15319431881256 | -1.23576133058697 |
| N  | -0.92622460436531 | -1.43296417418724 | 3.19066988946906  |
| C  | -0.39819579935013 | -0.59712653233506 | 4.13664283511100  |
| C  | -1.02791830158245 | -2.68017043088402 | 3.75011802431474  |
| C  | -0.19348391398679 | -1.29737072616114 | 5.30190560393656  |
| C  | -0.59829801340433 | -2.62930954007998 | 5.05517156865172  |
| H  | -0.56308922340600 | -3.44882527193260 | 5.75613228663501  |
| C  | -1.06104730702828 | -1.23173081711353 | -1.6143507506565  |
| C  | -2.6534641426277  | 0.1500461017172   | -0.68585033714288 |
| H  | -0.5541098536851  | -3.49806286221514 | -3.11380110738224 |
| C  | 0.32164195297781  | -2.92880854225385 | -2.80058939999146 |
| C  | 1.34681238618744  | -1.41655429180560 | -1.10322024989960 |
| C  | 0.07697757682198  | -2.20166313924478 | -1.4814693196287  |
| H  | 2.17948577151881  | -2.11062723645255 | -0.98650310013419 |
| H  | 1.15404132850479  | -3.62451661583815 | -2.69929000109810 |
| H  | 1.22516021149215  | -0.88209998986448 | -0.16186191163224 |
| H  | -3.49675062572747 | -3.88102241334212 | 3.93362072956533  |
| C  | -3.08817513878062 | -3.84785166508404 | 2.92114734556017  |
| C  | -1.14339395732666 | -5.15163565335314 | 3.71361028094435  |
| C  | -1.54599789370117 | -3.86868769084939 | 2.98040074397332  |
| H  | -0.06094669634904 | -5.24758526624955 | 3.78751157515258  |
| H  | -3.47661151768066 | -2.95425834991351 | 2.43848403891411  |
| H  | -1.53492113332869 | -6.03022172865918 | 3.19852524141974  |
| H  | 0.56187913981395  | 2.62758056865725  | 4.84758579534527  |
| C  | 0.19123818878562  | 1.62609330519249  | 5.07287565833759  |
| C  | 1.48002542333587  | 0.69129642614989  | 3.16637270214562  |
| C  | 0.0741746737418   | 0.79350963953218  | 3.79712603731336  |
| H  | 1.89552042989579  | 1.68168977294157  | 2.90311423664536  |
| H  | 0.89355768868015  | 1.6756938676385   | 5.7963757279235   |
| H  | 1.46324449072078  | 0.08861920827764  | 2.25785918952573  |
| C  | -2.36745883443570 | 1.64738793850711  | -0.49846771734544 |
| C  | -3.60901655373647 | 2.49678199580818  | -0.78493824976725 |
| C  | -1.22311220345192 | 2.18131203917890  | -1.38228215294222 |
| H  | -4.43796613904433 | 2.2560848442276   | -0.1213555244522  |
| H  | -0.9935581200764  | 3.20587960488555  | -1.08530667080388 |
| H  | -3.38015866293787 | 3.55309404565569  | -0.64547439139735 |
| H  | -1.47861089002667 | 2.18268739314353  | -2.44484920045228 |
| H  | -3.94585670330136 | 2.38075221236308  | -1.81724817941668 |
| H  | -0.30970442315201 | 1.60284303970886  | -1.24786574079159 |
| H  | 1.60979994302092  | -0.68513989596772 | -1.87222971254112 |
| H  | 0.58035158545058  | -2.22401624076567 | -3.59359565105577 |
| H  | -1.56081553473509 | -5.16099844542971 | 4.72138312580762  |
| H  | -3.45889382345818 | -4.71557252453284 | 2.36930119017681  |
| H  | -2.17650870193403 | 0.21866612526432  | 3.86176020672526  |
| H  | -0.77218551811898 | 1.71842935358637  | 5.57411892571822  |
| H  | 0.22360768623811  | -0.91422777809093 | 6.22057255491533  |
| C  | -2.83009356984684 | -0.05538333063962 | -2.33620305648796 |
| H  | -3.61549564542902 | 0.38301075156400  | -2.93346826257925 |
| H  | -1.8680501878600  | -0.87673949969882 | -2.77755746933100 |
| H  | -1.73230185226641 | -1.25116745283473 | -3.78014884676707 |
| N  | -1.48612025198168 | -0.62468661333992 | -0.57248190808732 |
| C  | -0.83966010575834 | 1.48234769935039  | 2.82314871031905  |
| C  | -1.41739726306680 | 2.72659891925480  | 2.91581177980657  |
| H  | -1.34696854748676 | 3.41289566412199  | 3.74508923340401  |
| C  | -2.13166839938602 | 2.93004847814248  | 1.71462240296002  |
| H  | -2.69529950584896 | 3.81201539378294  | 1.44958754888666  |
| C  | -1.94694390058418 | 1.80535954701894  | 0.94407843451067  |
| N  | -1.15062201548563 | 0.91022891140519  | 1.62161269476499  |
| C  | -3.77612393506105 | -0.537777283972   | 0.04275310885033  |
| Al | -1.46683287289200 | -1.00634005006007 | 1.40546872601032  |
| H  | -4.54776544813392 | 0.22737020680204  | 0.2211244429518   |
| O  | -3.23002102412021 | -0.96849549811306 | 1.21608671120538  |
| C  | -4.43138994534596 | -1.65974811991611 | -0.74069187054405 |
| C  | -5.58993530270887 | -3.68126251458071 | -2.30786682030553 |
| C  | -5.55071700405972 | -1.40999897555303 | -1.53053277716374 |
| C  | -3.9233799539040  | -2.94957780606336 | -0.72988315821122 |
| C  | -4.48563945527370 | -3.95307809610902 | -1.50981414790436 |
| C  | -6.12845007690218 | -2.39659464067870 | -2.30761139832671 |
| H  | -5.98614513729813 | -0.41556155209763 | -1.53646861921322 |
| H  | -3.07392344838129 | -3.19836076414878 | -0.10890512608394 |
| H  | -4.03931347761962 | -4.93762247438358 | -1.46759919877493 |
| H  | -7.00349210337393 | -2.18755486391219 | -2.91030929448750 |
| O  | -6.20877328975690 | -4.59290705785261 | -3.10071455343418 |
| C  | -5.71064205501177 | -5.90071754645450 | -3.10487612535127 |
| H  | -4.67496910534877 | -9.50384791458573 | -3.45804273771568 |
| C  | -3.30737665671826 | -6.47307117301272 | -3.78750825720529 |
| H  | -5.75703741334741 | -8.36946843294333 | -2.11595950602654 |

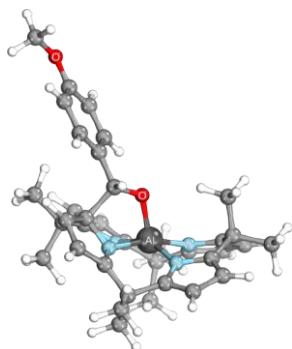

### [1]-*p*-methoxybenzaldehyde 1,2 adduct isomer A

|    |                   |                   |                   |
|----|-------------------|-------------------|-------------------|
| N  | -0.71723008867919 | -2.70186690493098 | 0.78907408655278  |
| C  | -0.89685563095837 | -3.84805832594626 | 1.51509855701315  |
| C  | -0.22547581177418 | -3.07610724400964 | -0.43477432135514 |
| C  | -0.51823716943233 | -4.93823229219458 | 0.76170823245174  |
| H  | -0.55029020320399 | -5.97354546023561 | 1.06232386400479  |
| C  | -0.08832108198066 | -4.44381449697967 | -0.48763913632416 |
| H  | 0.28157800938375  | -5.02727785431313 | -1.31716509191886 |
| N  | -0.76496351628277 | -1.46458406913322 | 3.22950928600650  |
| C  | -0.21917546021292 | -0.70204345388531 | 4.2264452306921   |
| C  | -0.95561068171802 | -2.72611078533983 | 3.73143291477044  |
| C  | -0.08945376091539 | -1.46143210106485 | 5.36459178709668  |
| C  | -0.56279005613318 | -2.75581387212171 | 5.04840125837508  |
| H  | -0.59443765814801 | -3.60556977544933 | 5.71254235633178  |
| C  | -0.93473853628732 | -1.05312016505976 | -1.57176641241662 |
| C  | -2.39674792795108 | 0.43229929524291  | -0.74456053794790 |
| H  | -0.57318673960238 | -3.29963681433381 | -3.15850365230036 |
| C  | 0.33112420950313  | -2.77072309617949 | -2.85607251680984 |
| C  | 1.47215127550548  | -1.36477658998532 | -1.14333580599103 |
| C  | 0.15649787374312  | -2.08046114813764 | -1.50590395032791 |
| H  | 2.27498802165534  | -2.09945885685753 | -1.07766990493487 |
| H  | 1.13987622332838  | -3.49887237584535 | -2.80615298573635 |
| H  | 1.40341507012643  | -0.86105621706155 | -0.17975398844604 |
| H  | -3.49563613372388 | -3.78162197819390 | 3.78418096694438  |
| C  | -3.05038139079051 | -3.73998693756266 | 2.78751054155311  |
| C  | -1.20647347978483 | -5.18266100282612 | 3.57971580565037  |
| C  | -1.51454599011481 | -3.84884818282979 | 2.89481948093086  |
| H  | -0.13320297393728 | -5.34128896427066 | 3.68323784741642  |
| H  | -3.37071045797258 | -2.81137827511955 | 2.32112777943842  |
| H  | -1.62643074412964 | -6.01404752383218 | 3.011176330849663 |
| H  | 0.88607581630075  | 2.43198386705073  | 5.1077495782383   |
| C  | 0.46604835467602  | 1.43942571331320  | 5.27940886252800  |
| C  | 1.73743281967043  | 0.53554071532190  | 3.34675568826184  |
| C  | 0.32877640160272  | 0.67636061869399  | 3.96298893179753  |
| H  | 2.16909913953518  | 1.51761118214757  | 3.138372604684702 |
| H  | 1.13577994073966  | 0.91434454341749  | 5.96117038214690  |
| H  | 1.70569256973974  | -0.02021026371340 | 2.40939058184183  |
| C  | -1.93678177287384 | 1.87273709830496  | -0.33523083531136 |
| C  | -2.98770037314174 | 2.93125994590616  | -0.68575958337344 |
| C  | -0.67087004478447 | 2.23904433139641  | -1.14140471157595 |
| H  | -3.88917885284273 | 2.86532536413179  | -0.08521784167921 |
| H  | -0.35921294465883 | 3.24267662152244  | -0.85170637800713 |
| H  | -2.56227873589622 | 3.92354874968203  | -0.53120032087207 |
| H  | -0.84702965496513 | 2.23919977894066  | -2.22029029329372 |
| H  | -3.27382127880381 | 2.87176602288774  | -1.73738511035323 |
| H  | 0.16226377447263  | 1.57349679700843  | -0.92386710850485 |
| H  | 1.74487107253484  | -0.61778937084358 | -1.89397828766873 |
| H  | 0.59116729770789  | -2.04951029109294 | -3.63403462848193 |
| H  | -1.65641787151998 | -5.23174064316364 | 4.572713716440050 |
| H  | -3.44623621621394 | -4.56877897505627 | 2.19523550115692  |
| H  | 2.39855613986520  | -0.00413942285109 | 4.02771318542064  |
| H  | -0.49898600302663 | 1.55297670261465  | 5.77345834626772  |
| H  | 0.32083962942164  | -1.14207373010037 | 6.31032483147422  |
| C  | -2.6336746436437  | -2.74860741705006 | -2.20727926627942 |
| H  | -3.39690910227011 | 0.79782649124077  | -2.76492551608596 |
| C  | -1.75815503424426 | -0.61618058130279 | -2.89644532664423 |
| H  | -1.67871200460787 | -0.97254254476285 | -3.71220409729224 |
| N  | -1.28584728251165 | -0.44718321469148 | -0.50264165974465 |
| C  | -0.53621440973814 | 1.45365787878767  | 3.01157648399250  |
| C  | -1.07755619549895 | 2.70792952758566  | 3.16875037753888  |
| H  | -1.00705957337737 | 3.33815294269781  | 4.04146236212276  |
| H  | -1.74547114153324 | 3.01357840201018  | 1.96144306777787  |
| H  | -2.27486397300610 | 3.92655853886296  | 1.73485020244120  |
| C  | -1.57189535025031 | 1.93548328489384  | 1.12645004344789  |
| N  | -0.82931277214538 | 0.96708147091079  | 1.76741210114697  |
| C  | -3.53573689104657 | -0.29675596210278 | 0.12688924037173  |
| Al | -1.24772634806244 | -0.92469500373912 | 1.46408203596316  |
| C  | -0.02526540029601 | -0.72121240526126 | 1.31664003334585  |
| H  | -3.82125011567759 | -1.15205816435495 | -0.51402608675650 |
| C  | -4.77317678506428 | 0.54628447165418  | 0.31321296086619  |
| C  | -7.04158816199740 | 2.16042769699763  | 0.63635630681691  |
| H  | -0.00864131421588 | 1.21017839947692  | 1.51609548230580  |
| H  | -5.70630772721219 | 0.68088939138217  | -0.70018833222289 |
| C  | -6.83317906488252 | 1.48408204192736  | -0.55923113858383 |
| C  | -6.12339106724818 | 2.01008148157124  | 1.67444719570421  |
| H  | -4.29585126966144 | 1.10734439313486  | 2.32260844107955  |
| H  | -5.56464220183893 | 0.14427541068758  | -1.63256154813600 |
| H  | -7.53164581480376 | 1.55658757009700  | -1.38229291098027 |
| H  | -6.29479406843113 | 2.53023870836963  | 2.60841053676296  |
| O  | -8.10219489552894 | 2.9696068576507   | 0.88357416830034  |
| H  | -0.04855541590202 | 3.14318465020642  | -0.12982293975568 |
| H  | -8.61814346457955 | 3.58776702655613  | -1.03450449668873 |
| H  | -8.90534128272871 | 3.8226367443648   | 0.25921534658350  |
| H  | -9.53973999470521 | 2.20461794567548  | -0.41101914923244 |

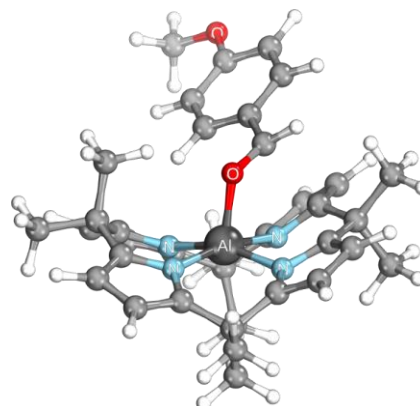

### [1]-*p*-methoxybenzaldehyde TS2 isomer B

|    |                    |                    |                   |
|----|--------------------|--------------------|-------------------|
| N  | -0.88848726621878  | -2.81103441164593  | 0.86750692055786  |
| C  | -1.11737900426968  | -3.89706931387043  | 1.68080837034903  |
| C  | -0.51904448453076  | -3.30295835760382  | -0.35657417433270 |
| C  | -0.90039361675920  | -5.05684802598111  | 0.96904130857825  |
| H  | -0.99310658716409  | -6.06565276844836  | 1.33919152223231  |
| C  | -0.51321641549596  | -4.67689968964191  | -0.33351616656222 |
| H  | -0.25208739678815  | -5.33639609758434  | -1.14685296111023 |
| N  | -0.85492607615456  | -1.37865640403970  | 3.17974410236607  |
| C  | -0.28491946230866  | -0.53528890830833  | 4.09792192454529  |
| C  | -1.00256102615585  | -2.59826818424938  | 3.79469534625834  |
| C  | -0.09171027344259  | -1.19805262914122  | 5.28425410025151  |
| C  | -0.55407667401526  | -2.51798771383727  | 5.09106313202245  |
| H  | -0.54669780605611  | -3.31127235289089  | 5.82202103011119  |
| C  | -1.23937145801094  | -1.34068705381862  | -1.62695112081460 |
| C  | -2.46776305105963  | 0.36578361268222   | -0.97948831662206 |
| H  | -1.06336493702742  | -3.71959899291198  | -3.01393483960374 |
| C  | -0.12012131162217  | -3.21124269413849  | -2.81041653079879 |
| C  | -1.7807698665315   | -1.72866725896446  | -1.29410567758549 |
| C  | -0.18929015647601  | -2.40599852040425  | -1.51535343201340 |
| H  | 1.95925385527567   | -2.48703645514854  | -1.22211484223277 |
| H  | 0.66561590360318   | -3.96473831132809  | -2.75142920230188 |
| H  | 1.19663829662730   | -1.14698707212153  | -0.37292349334733 |
| H  | -3.47024272476997  | -3.74611797469165  | 4.20833781847756  |
| C  | -3.1396116596790   | -3.75156755915023  | 3.16738207153902  |
| C  | -1.17004686756954  | -0.6322986045592   | 3.86021336813553  |
| C  | -1.59763998445679  | -3.79695212362740  | 3.10822533572666  |
| H  | -0.08694460261745  | -5.18020611596603  | 3.86002805626122  |
| H  | -3.54652547251655  | -2.86528431091957  | 2.68988516256878  |
| H  | -1.61452645144854  | -5.95141577940905  | 3.40941796190006  |
| H  | 0.75185498956664   | 2.67872738879094   | 4.72595051130231  |
| C  | 0.40742759739937   | 1.67650253807695   | 4.98626157886993  |
| C  | 1.52606162121871   | 0.73972881599827   | 2.97992951664702  |
| C  | 0.17884360994814   | 0.84384212672605   | 3.72651991162851  |
| H  | 1.88646582635179   | 1.7299732568296    | 2.6913473044752   |
| H  | 1.17175448892594   | 1.22114361124941   | 5.61701401026757  |
| H  | 1.43756566996345   | 0.14391344400515   | 2.07088674920703  |
| C  | -2.42787484845068  | 1.77526744622146   | -0.42184641181698 |
| C  | -3.75879837383202  | 2.49505087129843   | -0.65715979281548 |
| C  | -1.33980489645825  | 2.52438409336733   | -1.23175258536997 |
| H  | -4.56165530810044  | 2.09310878023239   | -0.03954201489736 |
| H  | -1.23732318289069  | 3.54849740343279   | -0.86901313184924 |
| H  | -3.68695746787725  | 3.55396219333259   | -0.41501344324846 |
| H  | -1.58295929272722  | 2.54884141111899   | -2.29694850102861 |
| H  | -0.06502143381856  | 2.43386842705717   | -1.70304331288612 |
| H  | -0.37548630933159  | 2.03064601565858   | -1.11416903871986 |
| H  | 4.20707230936520   | -1.05303337315192  | -2.11773751966882 |
| H  | 0.11101429940547   | -2.56140739837329  | -3.85629425523468 |
| H  | -1.51405468208965  | -5.02847667280200  | 4.89440444945305  |
| H  | -3.56533338010959  | -6.2801428154685   | 2.67224051289848  |
| H  | 2.27550930010702   | 0.26127986582326   | 3.61364407049826  |
| H  | -0.50691815143228  | 1.76701562218947   | 5.57271010865704  |
| H  | 0.34601217421722   | -0.79486533064492  | 6.18425226226653  |
| C  | -2.80099727462972  | 0.08814128510370   | -2.32325853611460 |
| H  | -3.51803888294455  | 0.62886831858199   | -2.92323652679904 |
| C  | -2.04748603304861  | -0.99123300378449  | -2.72865491807431 |
| H  | -2.09119735926185  | -1.49918757838278  | -3.67866769813765 |
| N  | -1.48072834188991  | -0.53244394133349  | -0.60111513797503 |
| C  | -0.82068493022924  | 1.52525225938729   | 2.83967171148312  |
| C  | -1.41205910982135  | 2.75278804188817   | 2.98781562251090  |
| H  | -1.29927022294035  | 3.42789687114417   | 3.82159144323079  |
| C  | -2.19148965205008  | 2.96539629173812   | 1.82929624332929  |
| H  | -2.7655741512091   | 3.85028242429671   | 1.59763959479107  |
| C  | -2.02689640240401  | 1.86049634012483   | 1.02751097119575  |
| N  | -1.19701370472880  | 0.95660769699892   | 1.65217675323723  |
| C  | -3.96230840828791  | -0.77404364727985  | 0.32072441044758  |
| Al | -1.37404050991572  | -0.96566275944178  | 1.36675162623083  |
| H  | -4.60402207910545  | 0.11141829455872   | 0.36932633769924  |
| O  | -3.24012031419517  | -1.03107331380225  | 1.33250580546957  |
| C  | -4.38903645599465  | -1.801269711114972 | -0.61928587656212 |
| C  | -5.214265210195011 | -3.70293794482507  | -2.4948335513065  |
| C  | -5.41763556826675  | -1.51708779464128  | -1.52614809468923 |
| C  | -3.79737958322805  | -3.05701624794749  | -0.66324120801058 |
| C  | -4.20155816353832  | -4.00394098885578  | -1.59782482150009 |
| C  | -5.83307230218701  | -2.4456885665447   | -2.44665371659807 |
| H  | -5.88214340129709  | -0.53729857402070  | -1.51062168882926 |
| H  | -3.03020795883236  | -3.33048521254678  | 0.04503666797389  |
| H  | -3.69630774459650  | -4.95986313792856  | -1.59510918635398 |
| H  | -6.62901904220632  | -2.22168084038350  | -3.14506046090649 |
| O  | -5.67317034412672  | -4.5862852059117   | -3.44188451533562 |
| C  | -5.06468310521777  | -5.80746436924551  | -3.55105633240711 |
| H  | -3.95572312121442  | -5.73321502708264  | -3.77486462881810 |
| H  | -5.557242357258085 | -6.3202512218884   | -4.3739679834197  |
| H  | -5.18433973794323  | -6.40702400535122  | -2.64296405247687 |

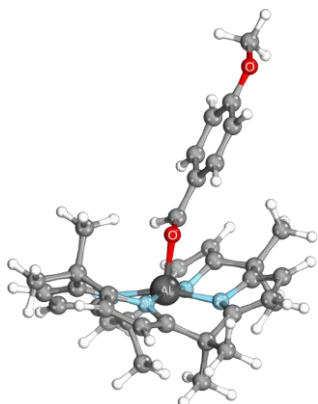**[1]-p-methoxybenzaldehyde TS2 isomer A**

|    |                    |                   |                   |
|----|--------------------|-------------------|-------------------|
| N  | -0.89868314737258  | -2.58867839805871 | 0.78190188699013  |
| C  | -1.22329055148910  | -3.70581633517057 | 1.51261117038090  |
| C  | -0.54770867813271  | -3.02391018872105 | -0.47041189505583 |
| C  | -1.08604795448591  | -4.82715924856766 | 0.72651308328328  |
| H  | -1.27059247483019  | -5.84784066466207 | 1.02205960865751  |
| C  | -0.65191785312976  | -4.39108675017857 | -0.54294191679508 |
| H  | -0.43370071261273  | -5.01196488766210 | -1.39830211683545 |
| N  | -0.60834064505865  | -1.39270490493727 | 3.22476241352381  |
| C  | 0.06384731222244   | -0.71894004292415 | 4.21118417006752  |
| O  | -0.93985898076573  | -2.62586753583005 | 3.73105839738514  |
| C  | 0.1474176406484    | -1.50279890524262 | 5.33482709928758  |
| C  | -0.49794407185734  | -2.72185122420018 | 5.02859162201256  |
| H  | -0.61389505771547  | -3.56720131844262 | 5.68868274414007  |
| C  | -0.94796972487209  | -0.88202545357770 | -1.55404705133717 |
| C  | -1.99392792294033  | 0.87335169570988  | -0.73034336603804 |
| H  | -1.04548873893921  | -3.14141093936856 | -3.16147007788988 |
| C  | -0.05487164750798  | -2.76829444618240 | -2.90029456330904 |
| H  | 1.38667963359368   | -1.63168221685228 | -1.22565582006156 |
| C  | -0.05350605044174  | -2.08379959945000 | -1.53386380141917 |
| H  | 2.04757368585137   | -2.4926857371670  | -1.20462914562563 |
| H  | 0.6318750838933    | -3.6147340955679  | -2.90258745063783 |
| H  | 1.45822821896978   | -1.13978833866358 | -0.25608935320703 |
| C  | -3.56600059408069  | -3.39686224009571 | 4.03470031316674  |
| C  | -3.22105405667174  | -3.36977398075161 | 2.99861440423687  |
| C  | -1.49573147150351  | -5.03039875162714 | 3.58420602349085  |
| C  | -1.70524983845808  | -3.65491169761877 | 2.94185294970099  |
| H  | -0.44465847142158  | -5.31721864842374 | 3.57951622948398  |
| H  | -3.47477587656657  | -2.39445431434703 | 2.59476598106327  |
| H  | -2.06603354132880  | -5.79504881030174 | 3.05521895010926  |
| H  | 1.49794529794120   | 2.26802351090192  | 5.11857463756298  |
| C  | 1.02695708391818   | 1.29856230868958  | 5.28960380610567  |
| C  | 2.03299797667038   | 0.40990173905292  | 3.20341283980510  |
| C  | 0.70454902939392   | 0.61748747276668  | 3.96122737379881  |
| H  | 2.51981772527602   | 1.36790055363233  | 3.00609190728135  |
| H  | 1.72150731994102   | 0.69476179368757  | 5.87485245572602  |
| H  | 1.87663583175892   | -0.08301021520286 | 2.24332814317774  |
| C  | -1.75086832827716  | 2.22195908511063  | -0.07698572533960 |
| C  | -2.94943846821919  | 3.15451527164234  | -0.25765173794183 |
| C  | -0.55482465859144  | 2.84627222145846  | -0.83808705573793 |
| H  | -3.1560702744023   | 2.83545868210219  | 0.31522620074302  |
| H  | -0.31240183094321  | 3.62194984491749  | -0.41359743377625 |
| H  | -2.69313925525964  | 4.16396528716794  | 0.06465316338996  |
| H  | -0.78181231533110  | 2.97180966214690  | -1.90035591239658 |
| H  | -3.24218147587699  | 3.22321736833041  | -1.30700505949820 |
| H  | 0.32854760544687   | 2.21500091173132  | -0.74843587066977 |
| H  | 1.75238177948512   | -0.93063689647230 | -1.98001732982313 |
| H  | 0.27243378227250   | -2.07728196776364 | -3.67962115223752 |
| H  | -1.84860764980311  | -5.02804684620758 | 4.61603035718814  |
| H  | -3.76937131222928  | -1.4227970361874  | 2.42936004407392  |
| H  | 2.70988876033598   | -0.21673830506890 | 3.78760523429095  |
| O  | 0.12674205353467   | 1.45239014400034  | 5.88467249432062  |
| H  | 0.62608723735903   | -1.24468772598171 | 6.26682934316661  |
| C  | -2.40657431275007  | 0.7251530655647   | -2.0774926786588  |
| H  | -3.09206490483133  | 1.37617218571963  | -2.60001751677454 |
| H  | -1.77474731813679  | -0.38838107044386 | -2.58849075118388 |
| H  | -1.89518779786039  | -0.81837574799704 | -3.57045824639378 |
| N  | -1.06298664355941  | -0.13130494428045 | -0.47055225272613 |
| C  | -0.19552081634422  | 1.49505400517415  | 3.14256571021952  |
| C  | -0.64504112934331  | 2.76547362639416  | 3.40670477294126  |
| H  | -0.46085969347408  | 3.34374571109640  | 4.29869586488550  |
| C  | -1.38924507426554  | 3.17209176241711  | 2.27559736354994  |
| H  | -1.86132096984378  | 4.13242280286448  | 2.13138910351520  |
| C  | -1.34533419827352  | 2.13576064963450  | 1.73705786437820  |
| O  | -0.62364931170171  | 1.09089399427542  | 1.90810807042283  |
| C  | -3.46724398394673  | -0.51532256449669 | 0.31896456439580  |
| Al | -1.05474329873600  | -0.75697658855792 | 1.46654229517490  |
| O  | -2.90035516071580  | -0.46838879608458 | 1.45119618672381  |
| H  | -3.31674850133737  | -1.06634251679173 | -0.46817915772209 |
| C  | -4.77004506878110  | 0.36641400380143  | 0.29628995510614  |
| C  | -7.26758891796328  | 1.61730404152707  | 0.25158393333592  |
| C  | -5.25504834901830  | 1.02241246185352  | 1.42955424721980  |
| C  | -5.5688838542012   | 0.34164506935921  | -0.84595280395997 |
| C  | -6.79733949624059  | 0.95868328715584  | -0.88223263161056 |
| C  | -4.68627108823196  | 1.64241096077470  | 1.40749535562977  |
| H  | -4.64705309748152  | 1.05266517324345  | 2.32400517053906  |
| H  | -5.18745306208257  | -0.16271510843384 | -1.73117591692556 |
| H  | -7.37783558516708  | 0.91548330741195  | -1.79365192905995 |
| H  | -6.85959429327566  | 2.15566749835163  | 2.28418309023597  |
| O  | -8.45723105888968  | 2.25215404868152  | 0.32276719256827  |
| C  | -9.2795982259588   | 2.25788791815588  | -0.81086881248064 |
| H  | -8.80648328752212  | 2.75085060636043  | -1.66682667145445 |
| H  | -10.17506101887689 | 2.81593408018800  | -0.54400718533630 |
| H  | -9.57805250855741  | 1.24829211500345  | -1.11493780394210 |

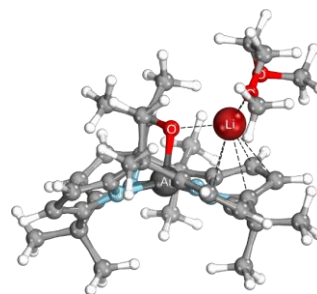**[1]-acetone Li(dme) isomer B**

|    |                    |                   |                   |
|----|--------------------|-------------------|-------------------|
| N  | -0.98845429023440  | -2.72082117426233 | 0.55538137627255  |
| C  | -1.19685649694058  | -3.89257418304641 | 1.23578962033721  |
| C  | -0.49598890036987  | -3.05883696407447 | -0.68341085783150 |
| C  | -0.85074901320151  | -4.95787308877251 | 0.43918585176889  |
| H  | -0.90639553613861  | -6.00306307434438 | 0.69738432689676  |
| C  | -0.40264466861864  | -4.42419154857294 | -0.78892804411665 |
| H  | -0.04041409874223  | -4.98490524328673 | -1.63642100370867 |
| N  | -1.07517112688420  | -1.51958729844410 | 3.02248015203713  |
| C  | -0.41961665394545  | -0.80379406438666 | 3.99631389403033  |
| C  | -1.14983932241257  | -2.82364544873772 | 3.45823174220478  |
| C  | -0.08949941770938  | -1.63538477801335 | 5.04127135237825  |
| C  | -0.56748953492566  | -2.92450419817408 | 4.69775819332492  |
| H  | -0.47374542997559  | -3.81784714585175 | 5.29412901661197  |
| C  | -1.16133540015884  | -1.00721181505167 | -1.7588637347432  |
| C  | -2.70648384496187  | 0.38864397054072  | -0.91955903178536 |
| H  | -0.72212231799544  | -3.17597541955323 | -3.4286370604753  |
| C  | 0.16708283660751   | -2.66035946383770 | -3.06515028676934 |
| C  | 1.23492300066806   | -1.32502188328681 | -1.25089789695087 |
| C  | -0.06330430071170  | -2.02469171686828 | -1.69718633273770 |
| H  | 0.23450517663943   | -2.06235875382942 | -1.18598901240715 |
| H  | 0.97351588673440   | -3.39005089350439 | -3.00981788577991 |
| H  | 1.13440736327454   | -0.86230896107272 | -0.26920204210004 |
| H  | -3.72478512921510  | -3.83761662291007 | 3.58804135894508  |
| C  | -3.30893401145346  | -3.76025583409019 | 2.58050438132255  |
| C  | -1.48149905168117  | -5.27161124889103 | 3.27310624760104  |
| C  | -1.77509097687565  | -3.91541498838938 | 2.62958989042508  |
| H  | -0.41122895914650  | -5.46761939749686 | 3.32679452810626  |
| H  | -3.62192658200863  | -2.80523702091094 | 2.16506669344993  |
| H  | -1.94864782856799  | -6.07514815289586 | 2.70335038528537  |
| H  | 0.32894679250674   | 2.37663938198647  | 5.07159416885973  |
| C  | 0.01743870565425   | 1.33657508715082  | 5.17937299800962  |
| C  | 1.38582016619106   | 0.70487105216288  | 3.19956807800438  |
| C  | -0.02454021372938  | 0.63781965513333  | 3.62066433300999  |
| H  | 1.69503826925097   | 1.74015152532606  | 3.04119105481672  |
| H  | 0.73497877643922   | 0.85159498469979  | 5.83897116893677  |
| H  | 1.42082649467631   | 0.19417187106293  | 2.23735171225020  |
| C  | -2.26086379888543  | 1.83406109724033  | -0.47517706648616 |
| C  | -3.28121571353329  | 2.91099978111633  | -0.85515589906440 |
| C  | -0.95552757772233  | 2.21939510290217  | -1.20478312761121 |
| H  | -4.22011607724534  | 2.84519086565001  | -0.31537263857074 |
| H  | -0.66530848967789  | 3.21982082665694  | -0.88392362566422 |
| H  | -2.8605643302387   | 3.8960281837433   | -0.65232100684873 |
| H  | -1.07853595045895  | 2.24148371803580  | -2.28899491112550 |
| H  | -3.50209320639853  | 2.88149096461999  | -1.9226407342484  |
| H  | -0.12806482004306  | 1.55758959736010  | -0.96047085036053 |
| H  | 1.53683827629779   | -0.54915425948022 | -1.95861377459553 |
| H  | 0.46103745257303   | -1.90996878030580 | -3.80137654731636 |
| H  | -1.89185846073786  | -5.31422656013096 | 4.28265693099934  |
| H  | -3.74704582076724  | -4.55104639381301 | 1.96834273717057  |
| H  | 2.10860668013050   | 0.21997082319265  | 3.85668990609920  |
| H  | -0.95521913905946  | 1.31511810556052  | 5.67264278296681  |
| H  | 0.42321358066238   | 1.3638653238597   | 5.94502448696352  |
| Al | -1.05852517706461  | -0.98312187509772 | 1.23557701991310  |
| C  | -3.84652731229254  | -0.34152158009128 | -0.06645337576849 |
| C  | -4.22776302873291  | -1.67006156503651 | -0.73444553348023 |
| H  | -3.37925911091138  | -2.33187247050879 | -0.90559381730518 |
| H  | -4.74628195983340  | -1.52273955509061 | -1.68273117515467 |
| H  | -4.90677348034577  | -2.19967418670145 | -0.06510594639946 |
| H  | -5.12230694724291  | 0.48514300019820  | 0.04101144772508  |
| H  | -5.90955013555886  | -0.13225052265117 | 0.47835027840131  |
| H  | -5.47805982446164  | 0.80599510063889  | -0.9345978364623  |
| O  | -3.31648663945637  | -0.60429473175658 | 1.20518616398738  |
| C  | -2.89371116594301  | 0.27552406449623  | -2.39417654581758 |
| H  | -3.66258577660536  | 0.78294886936410  | -2.95851591382296 |
| C  | -1.95812893050616  | -0.54672366534211 | -2.89040978834916 |
| H  | -1.82421709430523  | -0.84763738845840 | -3.91783671046462 |
| N  | -1.57294936471927  | -0.46193207899007 | -0.67505336217778 |
| Li | -3.45186518498241  | 0.61896664396283  | 2.73886006354184  |
| C  | -0.97652181145699  | 1.35451952945954  | 2.90960387739535  |
| C  | -1.68869021530941  | 2.51521330959221  | 3.13044925304987  |
| H  | -1.70882260786713  | 3.09669829231709  | 4.03877548363784  |
| C  | -2.31628014501456  | 2.84106269626086  | 1.90096027636268  |
| H  | -2.911350044894776 | 3.71751952679883  | 1.69515859210632  |
| C  | -1.96113843091246  | 1.86329281035958  | 1.00065968970715  |
| H  | -5.00630087320976  | 1.36675004386892  | 0.66529925793422  |
| N  | -1.5385999449247   | 0.93524432473943  | 1.61937482427893  |
| O  | -0.2995216992295   | 1.81125540646434  | 3.12482465997618  |
| O  | -4.22975350055736  | -0.30800104012611 | 4.41001299113812  |
| C  | -6.11237776540885  | 0.82661588075103  | 3.57243589452924  |
| H  | -6.28118698521889  | 0.16041709421489  | 2.72457754724082  |
| H  | -7.08058993656770  | 1.26423728454562  | 3.84810870685     |

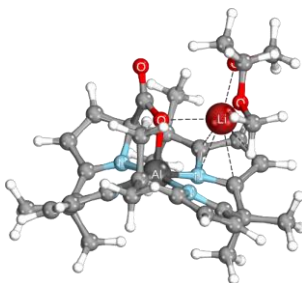**[1]-CO<sub>2</sub> Li(dme) isomer B**

|    |                   |                   |                   |
|----|-------------------|-------------------|-------------------|
| N  | -1.00308269033928 | -2.71525072595903 | 0.58955231160628  |
| C  | -1.19538676317049 | -3.88754459481341 | 1.27694204566908  |
| C  | -0.54258354624484 | -3.05324111165110 | -0.66201082226110 |
| C  | -0.86433987068500 | -4.95056697050553 | 0.47236389523486  |
| H  | -0.91592589372002 | -5.99600146024002 | 0.72981966228861  |
| C  | -0.44774400119019 | -4.4172695556572  | -0.76721581088702 |
| H  | -0.10955208680140 | -4.97854639687460 | -1.62404211016832 |
| N  | -1.01108686592262 | -1.53374681116126 | 3.070912405600089 |
| C  | -0.36025138497606 | -0.83081727913495 | 4.05809173352687  |
| C  | -1.14185736864397 | -2.83175004694002 | 3.51364148543606  |
| C  | -0.10280398106725 | -1.66284724627604 | 5.11914175758066  |
| C  | -0.60481661847027 | -2.93778996447490 | 4.77205854571676  |
| H  | -0.56760432628992 | -3.82780016383603 | 5.37852334952638  |
| C  | -1.22707294311562 | -0.98681932629185 | -1.68742580545827 |
| C  | -2.67828336133013 | 0.45089755495284  | -0.77458238248646 |
| H  | -0.90093724936163 | -3.15534967328438 | -3.38816689404919 |
| C  | -0.01023016210005 | -2.64857421680299 | -3.07013440728914 |
| C  | 1.18793243314920  | -1.3417635255643  | -1.30346174970788 |
| C  | -0.14166352003282 | -2.01850637088565 | -1.68867349967926 |
| H  | 1.97758400186306  | -2.09207378929269 | -1.28367753807424 |
| H  | 0.8117849819377   | -3.3855119590023  | -3.06067720499886 |
| H  | 1.14600063380025  | -0.88373542412449 | -3.01524379139475 |
| H  | -3.71721709487952 | -3.82681328513838 | 3.63286978457011  |
| C  | -3.30289809426968 | -3.75740336542067 | 2.62415953974684  |
| C  | -1.4787884813006  | -5.27583770484404 | 3.30773246986299  |
| C  | -1.76900702723859 | -3.91427647695785 | 2.67310669041629  |
| H  | -0.40902560116667 | -5.47297096224776 | 3.36523108430594  |
| H  | -3.62154588287879 | -2.80404161604903 | 2.19985313717975  |
| H  | -1.94466541017903 | -6.07446059043226 | 2.73033902799995  |
| C  | 0.59783136210238  | 2.30346968836917  | 5.10130109473191  |
| C  | 0.32639878704518  | 1.28262249187922  | 5.22139747820794  |
| C  | 1.49524624978783  | 0.58050619693700  | 3.19770434844514  |
| C  | 0.10519518301999  | 0.5868135543067   | 3.86704772289067  |
| H  | 1.85258703574198  | 1.59830632559902  | 3.02847607975057  |
| H  | 0.94644356135539  | 0.75876200473422  | 5.85574150442994  |
| H  | 1.47552388809924  | 0.06927417336387  | 2.23479751104380  |
| C  | -2.27913787938094 | 1.90516466567992  | -0.34048178322747 |
| C  | -3.44817889312301 | 2.86155018532607  | -0.57841276612614 |
| C  | -1.08151960175081 | 2.37993476024276  | -1.17712665241535 |
| H  | -4.32249392910161 | 2.61862365074620  | 0.02242336342729  |
| H  | -0.81692645823074 | 3.39146396442302  | -0.86974184547094 |
| C  | -3.14683455713755 | 3.88150294872338  | -0.34093744981472 |
| H  | -1.31167577220384 | 2.40419210651909  | -2.24373432847912 |
| H  | -3.74578915073023 | 2.86161948121586  | -1.62708875845533 |
| H  | -0.20150192664688 | 1.7575848713885   | -1.02497386448353 |
| H  | 1.46647902997373  | -0.56597063261610 | -2.02061424701014 |
| H  | 0.27211689060802  | -1.8970932436223  | -3.81723550589196 |
| H  | -1.89426740385405 | -5.32675386611185 | 4.31464727419319  |
| C  | -3.74251548891203 | -4.55237338891234 | 2.01925154974187  |
| H  | 2.21301812710534  | 0.05750038728777  | 3.83057344554495  |
| H  | -0.72093420816239 | 1.31561859533623  | 5.74975648579527  |
| H  | 0.04056331618183  | -1.40210792899946 | 6.03473910575782  |
| Al | -1.41835505688996 | -0.98208580490254 | 1.29816777092221  |
| O  | -3.27675810077438 | -0.62659726910498 | 1.26015462860327  |
| C  | -3.00746625776942 | 0.2830393426682   | -2.21687831443442 |
| H  | -3.83782597716353 | 0.76178740045432  | -2.71205506918915 |
| C  | -2.11702759679979 | -0.55690235850372 | -2.76083859940425 |
| H  | -2.07716248018591 | -0.90068389282529 | -3.78221637092290 |
| N  | -1.53880207724688 | -0.40397151153220 | -0.58702668620826 |
| Li | -3.26422796981826 | 0.78108488968328  | 2.84557227944165  |
| C  | -0.83782721624910 | 1.35501263356843  | 2.98860812861864  |
| C  | -1.45056975148136 | 2.56914040947777  | 3.22125047971960  |
| H  | -1.39402398207473 | 3.15890890209989  | 4.12212893172254  |
| C  | -2.11073387498519 | 2.92377223935652  | 2.02130476536246  |
| H  | -2.65694343800219 | 3.83566434317707  | 1.83887223110387  |
| C  | -1.87814352270966 | 1.91197430539993  | 1.11630352923735  |
| N  | -1.11318700584164 | 0.93177904964032  | 1.71591727597050  |
| O  | -5.09105135776294 | 1.69439857624496  | 2.78977500312618  |
| O  | -4.12663576942699 | -0.19981800555661 | 4.35287765348357  |
| C  | -5.9555810121702  | 0.62197914117343  | 3.11249187873848  |
| H  | -5.90019816538954 | -0.07363857269616 | 2.27587902438119  |
| H  | -6.99508339664874 | 0.96258674852853  | 3.19392425568934  |
| C  | -5.52436987822089 | -0.05216741374162 | 4.40122835409522  |
| H  | -6.02517980848398 | -1.02562209424446 | 4.47936000380758  |
| H  | -5.81226850129440 | 0.50105994049996  | 5.28797145776594  |
| C  | -5.31160108186879 | 2.86871308299792  | 3.53753367337771  |
| H  | -4.64149344474196 | 3.63271800111221  | 3.15124515886317  |
| H  | -5.10164891762976 | 3.7856922635836   | 4.60409257072190  |
| H  | -6.34327403131513 | 2.31616808018911  | 3.42355828349089  |
| C  | -3.60176380773765 | -0.96746903587745 | 5.41896031999341  |
| H  | -2.51849763358754 | -0.9772094981819  | 5.33141398141456  |
| H  | -3.96447093233269 | -1.99752762276391 | 5.37370562851619  |
| H  | -3.88249546595280 | -0.53322452728551 | 6.38479884164354  |
| C  | -3.77358918585620 | -0.08772537151830 | 0.17795433983434  |
| O  | -4.94282277435008 | 0.04468393362553  | -0.06678716898600 |

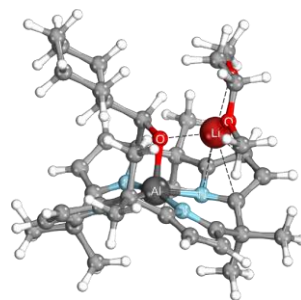**[1]-cyclohexanecarboxaldehyde Li(dme) isomer B**

|    |                    |                   |                    |
|----|--------------------|-------------------|--------------------|
| N  | -0.08744184641680  | -2.42533325417914 | 0.30706623760771   |
| C  | -0.20786370627785  | -3.67021773344735 | -0.87017136076786  |
| C  | 0.43302907551474   | -2.60133671901676 | -0.95170818368431  |
| C  | 0.20442360063810   | -4.62327100752698 | -0.03238570332870  |
| H  | 0.23138990136491   | -5.68997646585416 | 0.12138456143575   |
| C  | 0.61602854867093   | -3.9356651807878  | -1.19676026334034  |
| H  | 1.02271240884715   | -4.38567865336659 | -2.09089024053662  |
| N  | -0.35555558581426  | -1.44162259904007 | 2.85042135501329   |
| C  | 0.16693690147969   | -0.71819424532205 | 3.89820780986155   |
| C  | -0.21585771976184  | -2.77347878700925 | 3.17729343562379   |
| C  | 0.61759890034997   | -1.57300584756535 | 4.87282595136926   |
| C  | 0.37016540964122   | -2.88506442814118 | 4.41295156039248   |
| H  | 0.60410229491601   | -3.79915783641396 | 4.93442078340320   |
| C  | -0.34390087553782  | -0.50838788335760 | -1.86065033491787  |
| C  | -0.08641722786825  | 0.6177569884148   | -1.00400227311458  |
| H  | 0.36599335599259   | -2.44655722931424 | -3.70607835662428  |
| C  | 1.18866548556761   | -1.90759239822780 | -3.23566350572976  |
| C  | 0.203939738091710  | -0.68978687919895 | -1.23378223511729  |
| C  | 0.83063944373538   | -1.43702583978337 | -1.82906346584847  |
| H  | 2.89169012777591   | -1.36693028369423 | -1.18687581219081  |
| H  | 2.04625125677727   | -2.57791463300067 | -3.19940559926101  |
| H  | 1.84590016169164   | -0.33694415816210 | -0.2209205067153   |
| H  | -2.54471970512142  | -4.22847562059188 | 3.36859899566737   |
| C  | -2.23870822180233  | -3.96355411748166 | 2.35478012899958   |
| C  | -0.16293253634882  | -5.22181306463018 | 2.79339046353619   |
| C  | -0.70136426043518  | -3.88231508123108 | 2.28314815362815   |
| H  | 0.92574247167867   | -5.24997327165413 | 2.77485737806885   |
| H  | -2.71653381915877  | -3.01882616095782 | 2.10677422453245   |
| H  | -0.537456569038185 | -6.04332719142423 | 2.18240400173231   |
| H  | 0.25807174338833   | 2.41753278379413  | 5.30658713122208   |
| C  | 0.16240883369815   | 1.33066621188322  | 5.30354094217887   |
| C  | 1.65781220293182   | 1.1875953295751   | 3.32136683224033   |
| C  | 0.28016148324576   | 0.7804061291379   | 3.88225889468300   |
| H  | 1.75927088417901   | 2.27421062275969  | 3.28103405128880   |
| H  | 0.95451037357593   | 0.93433296777397  | 5.93754583290602   |
| H  | 1.80849706227343   | 0.80002566071683  | 2.31403604478134   |
| C  | -1.94874488150389  | 2.03867483617418  | -0.36752080641731  |
| C  | -3.17224178296924  | 2.88722918263817  | -0.71249611525520  |
| H  | -0.71023776475926  | 2.75933918791356  | -0.92721147329974  |
| H  | -4.11037365992125  | 2.43360023734887  | -0.39519161106192  |
| H  | -0.62930988933710  | 3.74061413661301  | -0.45919911861834  |
| H  | -3.09930657422937  | 3.86477988856013  | -0.23676314927489  |
| H  | -0.77316522241400  | 2.90795355072570  | -2.00674415667790  |
| H  | -3.23578196538916  | 3.06748562589865  | -1.7858873053657   |
| H  | 0.20920485754539   | 2.22156789721713  | -0.70390190670166  |
| H  | 2.31692127920859   | 0.17362596347321  | -1.84325154686910  |
| H  | 1.46391015507563   | -1.06557637944314 | -3.87339272367679  |
| H  | -0.49736313985538  | -5.40705803182822 | 3.81459160943810   |
| H  | -2.1660357491968   | -4.72887906967645 | 1.67343335231901   |
| H  | 2.45150987432487   | 0.78581428522298  | 3.95225202958809   |
| H  | -0.79197084902661  | 1.06678445904112  | 5.76087896656709   |
| H  | 1.08129011214432   | -1.29704302317202 | 5.80703862679981   |
| Al | -0.83650105826645  | -0.82716675383669 | 1.09497586264195   |
| C  | -3.18683719583347  | -0.27661883439668 | -0.28113555438134  |
| O  | -2.66816232130849  | -0.73543581908591 | 0.93065950702663   |
| C  | -2.14098008127291  | 0.67839149312162  | -2.4944170762387   |
| H  | -2.88797981963541  | 1.20602780474789  | -3.06662444470760  |
| C  | -1.09273597179254  | 0.01306348511105  | -2.99753927161038  |
| H  | -0.84351223670552  | -0.13257427270803 | -4.03691341515662  |
| N  | -0.87773277996746  | -0.12368254731515 | -0.76016448508114  |
| Li | -3.12910652670552  | 0.33111216364379  | 2.52274572506517   |
| C  | -0.78172494239281  | 1.38333499861832  | 3.01467713619212   |
| H  | -1.73473337624022  | 2.32937084798786  | 3.32672146097817   |
| H  | -1.92124172437798  | 2.76820532881808  | 4.29383681101737   |
| C  | -2.36875516659011  | 2.67594724924548  | 2.10591559527319   |
| C  | -3.12223696023357  | 3.43762982149785  | 1.97590141516056   |
| H  | -1.76943933115428  | 1.92173090138084  | 1.12059867384685   |
| N  | -0.82056013365952  | 1.09623102509263  | 1.67801602854973   |
| O  | -5.17674904607609  | 0.72935477299399  | 2.56487336546283   |
| O  | -3.70517619091123  | -0.9338043304486  | 3.99055858307201   |
| C  | -5.75097749931143  | -0.51975996348882 | 2.88217621148622   |
| H  | -5.60383963528623  | -1.22833997517846 | 2.05718818146816   |
| H  | -6.83067921448814  | -0.42700299357734 | 3.05645396330726   |
| C  | -5.09558905276448  | -0.10708635200120 | 4.14624032834179   |
| H  | -5.41367878672508  | -2.05194658460988 | 4.32976212395484   |
| H  | -5.42258971876380  | -0.41392450859519 | 5.00469710418332   |
| C  | -5.94953668873119  | 1.50122509834663  | 1.67984985383014   |
| H  | -5.41107577884996  | 2.42794307172791  | 1.49556255569233   |
| H  | -6.25191515757898  | 1.74247339604419  | 1.21466663338232   |
| H  | -6.11394178899534  | 0.99206989862749  | 0.72344269868027   |
| C  | -2.99672396280263  | -1.45921971168999 | 5.09749007733835   |
| C  | -3.93407771171586  | -1.32965303040644 | 4.92800170101320   |
| H  | -1.23051033030528  | -2.52622970467566 | 5.5272831594190    |
| H  | -1.33393231393932  | -2.52622970467566 | 5.5272831594190    |
| C  | -0.41794553233639  | 0.38278996415628  | -0.07241426290058  |
| C  | -3.70680123054738  | -0.4180565441898  | -1.20391298827636  |
| H  | -4.65665639365730  | -3.7259594089158  | -1.409234904569018 |
| C  | -3.93493736240794  | -1.94894984641579 | 3.01897826159385   |
| C  | -5.79877455244444  | -3.21796270342140 | -2.27954491197223  |
| H  | -4.87968415223647  | -0.89304904984744 | -2.047721296483    |

|   |                   |                   |                    |
|---|-------------------|-------------------|--------------------|
| C | -4.13780599875098 | -2.65725883662009 | -0.45199945171207  |
| H | -3.83089905680925 | -4.05757939303812 | -2.04771783762785  |
| H | -4.60766583059379 | -2.18360584021866 | -3.74495221157763  |
| H | -6.66977130218996 | -3.00406670012154 | -1.64979985064217  |
| H | -5.69435664896829 | -0.60464302947863 | -1.36987803145664  |
| H | -4.91624862337549 | -2.41261137996462 | 0.28191996571546   |
| H | -2.90440563598460 | -1.71941111630285 | -1.88145773950539  |
| H | -4.97242862355560 | -4.60503800550828 | -0.84249546880128  |
| H | -6.23565358370490 | -1.55409047200738 | -3.592636377881387 |
| H | -6.11356997698292 | -3.98795825093373 | -2.98791365112192  |
| H | -4.61762472687402 | 0.01412060204415  | -2.59737818748429  |
| H | -3.29610716849582 | -3.05815342014066 | 0.10508231063329   |

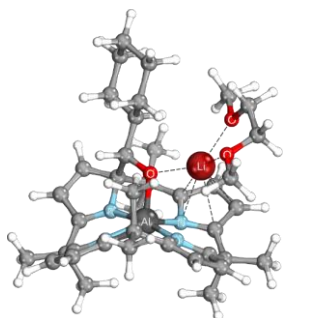

### [1]-cyclohexanecarboxaldehyde Li(dme) isomer A

|    |                   |                   |                   |
|----|-------------------|-------------------|-------------------|
| N  | -0.13269210150766 | -2.33801273922233 | 0.06243020388047  |
| C  | -0.15561136349548 | -3.61234188133606 | 0.56778188088884  |
| C  | 0.52274480984475  | -2.40002202387544 | -1.14426357405015 |
| C  | 0.47023374343255  | -4.46901964813934 | -0.30549133161045 |
| H  | 0.60330071841335  | -5.53189408769284 | -0.18411354113950 |
| C  | 0.90440980116857  | -3.69268067772083 | -1.40190878484845 |
| H  | 1.44326147012183  | -4.04909308068982 | -2.26585052410831 |
| N  | -0.56571191425761 | -1.56127287792758 | 2.65394207810057  |
| C  | -0.17506880542552 | -0.91812241750412 | 3.80189658618746  |
| C  | -0.52498915870147 | -2.91382712333565 | 2.90791625903698  |
| C  | 0.08885460994193  | -1.84457922560461 | 4.78028442679985  |
| C  | -0.13913204209096 | -3.11780378915251 | 4.21091474178291  |
| H  | -0.01172818306791 | -4.06899130598848 | 4.70259990189559  |
| C  | -0.42749095229251 | -0.3493495316599  | -1.98547000608166 |
| C  | -2.22111774189666 | 0.68898744553568  | -1.10470809431226 |
| H  | 0.48143270725523  | -2.15504978891455 | -3.88708458764376 |
| C  | 1.241640486948231 | -1.55441337244720 | -3.38721520506083 |
| C  | 1.95139507998561  | -0.33920680115647 | -1.33014457573424 |
| C  | 0.82353069046185  | -1.17224121703966 | -1.97010171834138 |
| H  | 2.86141071997864  | -0.9373600967093  | -1.28528471891237 |
| H  | 2.16048170353761  | -2.13813303330976 | -3.36269077701920 |
| H  | 1.71357763764566  | -0.04273452301468 | -0.30860517894362 |
| H  | -2.89466126614398 | -4.32184999210021 | 2.53853523324629  |
| H  | -2.38190036232416 | -4.02721728982467 | 1.61956767357694  |
| C  | -0.40619221302265 | -5.32213065053851 | 2.34322932370734  |
| C  | -0.85953542005157 | -3.94413211526777 | 1.85872905576744  |
| H  | 0.68663952099513  | -5.35237461686968 | 2.51832400916211  |
| H  | -2.80901580094678 | -3.08271714418566 | 1.28722974290127  |
| H  | -0.65650224162563 | -6.08818826819603 | 1.60902849349926  |
| H  | 0.12190926837690  | 2.14536166039025  | 5.33717560964229  |
| C  | -0.07050301641819 | 1.07299735834136  | 5.28307141099009  |
| C  | 1.49866060115273  | 0.86322123011849  | 3.36490887988844  |
| C  | 0.06395972452868  | 0.56735912300228  | 3.84782371127068  |
| H  | 1.70116948266637  | 1.93631049277652  | 3.37298515028023  |
| H  | 0.65222557419806  | 0.58159564447019  | 5.93330045192065  |
| H  | 1.66104542176533  | 0.50000389278605  | 2.35008695670228  |
| C  | -2.05777407265605 | 2.08950524941129  | -0.42123888148643 |
| C  | -3.25726653877480 | 2.99100130243983  | -0.71279846333250 |
| C  | -0.82075268125400 | 2.80971351344359  | -0.99496574603748 |
| H  | -4.19510447221786 | 2.60003831597045  | -0.32598116336752 |
| H  | -0.73713454602635 | 3.78780844074060  | -0.52075017315695 |
| H  | -3.10040463903368 | 3.97590278080533  | -0.27294196071456 |
| H  | -0.89530051812256 | 2.96733180251922  | -2.07259113171447 |
| H  | -3.37609695987880 | 3.14667952749525  | -1.78573073542282 |
| H  | 0.10285686575150  | 2.27483694268703  | -0.78436338966445 |
| H  | 2.15628689046444  | 0.56833970341220  | -1.90343294360618 |
| H  | 1.44031114816429  | -0.66707408868706 | -3.99124925635473 |
| H  | -0.91427850233560 | -5.58964468393645 | 3.27030259948392  |
| H  | -2.59960196661478 | -4.77552884908476 | 0.85515194881922  |
| H  | 2.22202938365488  | 0.36524228964122  | 4.01144165929046  |
| H  | -1.06616104429135 | 0.87954453989924  | 5.68507917525785  |
| H  | 0.42935915250043  | -1.64464642900620 | 5.78431634974646  |
| Al | -0.95183492984859 | -0.81738085451812 | 0.94055768901960  |
| C  | -3.24457412785335 | -0.35760213130362 | -0.47482211221005 |
| O  | -2.78627380542688 | -0.69950951662690 | 0.79666123151496  |
| C  | -2.8847226532358  | 0.75748491516024  | -2.59647104258896 |
| H  | -3.05998863661683 | 1.24386950120974  | -3.16634999183926 |
| C  | -1.21540120164220 | 0.13455576556987  | -3.11072640836059 |
| H  | -0.97412001099192 | -0.00221276921166 | -4.15324809774725 |
| N  | -0.9808668983677  | -0.01670084671577 | -0.8784606981655  |
| Li | -3.30895586739532 | 0.42849849420660  | 2.36006781037205  |
| C  | -0.89763127272353 | 1.30192040503405  | 2.95940722604210  |
| H  | -1.76524752695775 | 2.32494945468835  | 3.27781070123066  |
| H  | -1.92732042031772 | 2.75961249593593  | 4.25111746311416  |
| C  | -2.35942209770629 | 2.73922124656394  | 2.06107730871033  |
| H  | -3.04724808139859 | 3.56161653178561  | 1.94184607999853  |
| H  | -1.83477986429738 | 1.94476198122279  | 1.06476661377372  |
| N  | -0.94248504062505 | 1.05018223952253  | 1.61623298491074  |
| O  | -5.16340509852822 | 1.51431623541852  | 2.88104690801772  |
| O  | -4.0828635894661  | -0.7203303036188  | 3.84521296911012  |
| C  | -5.91245118442672 | 0.76816719453917  | 3.80847867062888  |
| H  | -6.59601337744205 | 0.08221584794689  | 3.29012438256719  |
| H  | -6.52075541467402 | 1.42531106149718  | 4.44443892670077  |
| C  | -4.95080738736828 | 0.00285484409116  | 4.67793302270564  |
| H  | -5.52527740690735 | -0.67020560128113 | 5.32784837623246  |

|   |                   |                   |                   |
|---|-------------------|-------------------|-------------------|
| H | -4.38585549642723 | 0.68656300537493  | 5.32618057570252  |
| C | -5.93027702445341 | 2.47671030860398  | 2.20223669929638  |
| H | -5.26879149176715 | 3.01995320085608  | 1.53221949832078  |
| H | -6.37950622131021 | 6.37950622131021  | 3.19138133755314  |
| H | -6.73161708824689 | 2.01967879686727  | 1.61074769319527  |
| C | -3.36032920855926 | -1.72216497712408 | 4.54478558915481  |
| H | -2.72300502084748 | -2.23917173137913 | 3.83631591709333  |
| H | -4.05191340864588 | -2.43962471830496 | 4.99802081456459  |
| H | -2.72573688208350 | -1.28971296093536 | 5.32122617188172  |
| H | -3.15194640505846 | -1.22376941102859 | -1.15443755648007 |
| C | -4.74139417590995 | -0.03016358127162 | -0.42328070533704 |
| C | -6.85152563514774 | 0.57121639734535  | -1.69887764489060 |
| C | -6.99421529467766 | -1.03320608940753 | 0.21192853350133  |
| C | -7.57320921227638 | -0.64694287095485 | -1.14141906179455 |
| C | -5.48755484094573 | -1.24914412702426 | 0.13958196148795  |
| C | -5.34241193174298 | 0.35623030778758  | -1.77451376139425 |
| H | -7.05716789757150 | 1.43770285450602  | -1.05909820490172 |
| H | -7.21569723582306 | -0.24101202719481 | 0.93744553472088  |
| H | -7.46091088032364 | -1.48601783149083 | -1.83610032331796 |
| H | -5.27973009807050 | -2.11329103750831 | -0.50313086646810 |
| H | -5.12173953341952 | -0.43027051029512 | -2.50602467772236 |
| H | -4.89976538904460 | 0.80464946010414  | 0.26977014562391  |
| H | -7.23725685727793 | 0.82665730348096  | -2.68850483324701 |
| H | -7.47773236909684 | -1.93616903094702 | 0.59198441647407  |
| H | -8.64543451610102 | -0.45248588808316 | -1.06247156957426 |
| H | -5.10315658710587 | -1.50855036427255 | 1.12571049095268  |
| H | -4.88774045963237 | 1.27187116403296  | -2.15372735972367 |

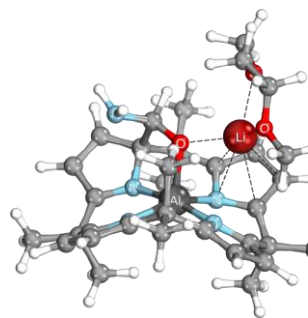

### [1]-formamide Li(dme) isomer B

|   |                   |                    |                   |
|---|-------------------|--------------------|-------------------|
| N | -0.23321846591480 | -2.27990643849878  | 0.12124546544553  |
| C | -0.37099151144603 | -3.54875384496428  | 0.62280842638884  |
| C | 0.31961394391948  | -2.40193397056198  | -1.12960986812556 |
| C | 0.08370017585107  | -4.46131814591699  | -0.29877560947761 |
| H | 0.10412902550211  | -5.53380769942665  | -0.19067073969113 |
| C | 0.52635858533476  | -3.72678222243378  | -1.4051774379909  |
| H | 0.95605756524738  | -4.32832873850504  | -2.32283893425659 |
| N | -0.49173101062270 | -1.45670397466820  | 2.72688533766473  |
| C | 0.07032482074000  | -0.84378948575686  | 3.82132829795864  |
| C | -0.48476428280357 | -2.81099426307378  | 2.97499304466890  |
| C | 0.41547953441103  | -1.79064501810660  | 4.75432614720369  |
| C | 0.05718068871828  | -3.04626819765450  | 4.21420217202986  |
| H | 0.19744954064884  | -4.00672622835596  | 4.68362219667570  |
| C | -0.46372850569235 | -0.25998718106595  | -1.92222947393162 |
| C | -2.11196498345677 | 0.90446244393031   | -0.95859429608727 |
| H | 0.15087035071756  | -2.13922261814190  | -3.86578126874732 |
| C | 0.99549466287460  | -1.6225195811843   | -3.40874157651409 |
| C | 1.93548122922822  | -0.49565438665414  | -1.39473229073097 |
| C | 0.69592795056178  | -1.20627826176703  | -1.9724981383820  |
| H | 2.78175979695465  | -1.18160753750707  | -1.41261150620605 |
| H | 1.84961865665320  | -2.29784051585136  | -3.43512435779382 |
| H | 1.78486385382789  | -0.18665695853629  | -0.36048738204242 |
| H | 2.96921549140611  | -0.43236724426918  | 2.84886987934472  |
| C | -2.52986436904351 | -3.77460441574598  | 1.88194903512927  |
| C | -0.60852023667038 | -5.22440357498726  | 2.43075284053251  |
| C | -0.99014332182633 | -3.815592515137127 | 1.97301222060167  |
| H | 0.47185864328894  | -5.34361109134722  | 2.5025517262118   |
| H | -2.90506922827476 | -2.79334113678226  | 1.60140128136368  |
| H | -0.98959634254632 | -5.97056092977163  | 1.73318628295448  |
| H | 0.48713540619356  | 2.19515705667408   | 5.37856184657534  |
| C | 0.28951264139127  | 1.12350933743508   | 5.3254262163206   |
| C | 1.7262754586169   | 0.93918983572074   | 3.30440226363195  |
| C | 0.32675773003910  | 0.63738406364607   | 3.87690861934401  |
| H | 1.93056496521563  | 2.01190898535433   | 3.31328221564579  |
| H | 1.05351656328528  | 0.62288705492135   | 5.91883841201952  |
| H | 1.82262174755151  | 0.58962846723064   | 2.27654088727837  |
| C | -1.93137703085812 | 2.27715620112054   | -0.24618238878622 |
| C | -3.15276603135221 | 3.16223842071016   | -0.49241343706769 |
| C | -0.70497157652179 | 3.00569760939647   | -0.82207075760418 |
| H | -4.0789582683314  | 2.71741009927393   | -0.13421159398294 |
| H | -0.59288336878051 | 3.96729355069021   | -0.3205588582970  |
| C | -0.03227934380048 | 4.12212508020572   | 0.00909068825862  |
| H | -0.80672572290444 | 3.19468293257395   | -1.89251884814792 |
| C | -3.27222032494263 | 3.37820385544451   | -1.55459597365206 |
| H | 0.21337969784394  | 2.44611018601650   | -0.65507028012174 |
| H | 2.19783110579578  | 0.39222792614941   | -1.97537364661324 |
| H | 1.25077421478611  | -0.75747737514595  | -4.02433191218605 |
| H | -1.05490406495126 | -5.44339163173658  | 3.4055888931420</ |

|   |                    |                   |                   |
|---|--------------------|-------------------|-------------------|
| H | -1.71032848800339  | 2.76021415300399  | 4.44718640614878  |
| C | -2.21598461198686  | 2.81599545116008  | 2.27027457804655  |
| H | -2.923027044116676 | 3.62853423846710  | 2.20282523833709  |
| C | -1.69266256172379  | 2.08028695623671  | 1.22849784422789  |
| N | -0.78032830249616  | 1.17277386563434  | 1.71619630394047  |
| O | -1.13967752794735  | 0.99094065775813  | 2.64892335293254  |
| C | -3.75665372713588  | -0.84703582792955 | 3.91413619717995  |
| C | -5.73188937574657  | -0.28587673107590 | 2.74512155954641  |
| H | -5.53690760169554  | -0.86772571123704 | 1.83516889429654  |
| H | -6.81990774251177  | -0.21076469441324 | 2.86858572050052  |
| C | -5.15124438510003  | -0.96547637868934 | 3.96117845426883  |
| H | -5.46242261856765  | -0.01864392540615 | 3.96670657012521  |
| H | -5.54498591688167  | -0.49993095193394 | 4.87551539012343  |
| C | -5.87125581305627  | 1.90490083759519  | 1.87249959211779  |
| H | -5.32424515013078  | 2.84471717303787  | 1.86846787083742  |
| H | -6.86539304445092  | 2.07901363730791  | 2.29747803303127  |
| H | -5.99349183654552  | 1.56423104133038  | 0.83810115784166  |
| C | -3.11296989421567  | -1.49738216852486 | 4.99343916968089  |
| C | -2.04452979082038  | -1.31862203808300 | 4.91452456919074  |
| H | -3.28616270432002  | -2.57619417525470 | 4.95681915868739  |
| H | -3.47631527828308  | -1.10968190877128 | 5.95167253816732  |
| H | -4.11391370705684  | 0.58151447064711  | -0.13241680683148 |
| N | -3.44173908948082  | -1.15819597477824 | -1.15459830703757 |
| C | -3.74750562024952  | -1.95213182277232 | -0.61077555078920 |
| H | -4.11972416021376  | -0.96929036840728 | -1.87890540325958 |

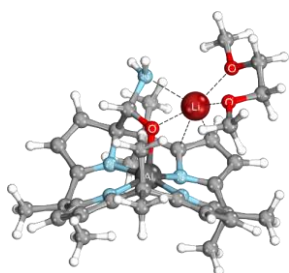

### [1]-formamide Li(dme) isomer A

|    |                   |                    |                    |
|----|-------------------|--------------------|--------------------|
| N  | 0.01207833743943  | -2.31540700271501  | 0.05647135268136   |
| C  | 0.05803850388166  | -3.59771211363693  | 0.54399704986224   |
| C  | 0.6720857286822   | -2.32440599101233  | -1.14993353277141  |
| C  | 0.73868157359943  | -4.40309956154453  | -0.33745096279415  |
| H  | 0.93076045169795  | -5.45856681535763  | -0.23204261055369  |
| C  | 1.13057472207777  | -3.58928912569640  | -1.42143289636968  |
| H  | 1.69052749123258  | -3.90400825973301  | -2.28814878586246  |
| N  | -0.47400672755792 | -1.63873266671659  | 2.66405636001573   |
| C  | -0.18937709677932 | -1.01129908178046  | 3.84917413771784   |
| C  | -0.45880197320370 | -2.99277650818766  | 2.8985690988367    |
| C  | -0.02824062187721 | -1.95140449515275  | 4.83746518301660   |
| C  | -0.20662375985002 | -3.21655675874445  | 4.23093250880405   |
| H  | -0.12397338605606 | -4.17404747634456  | 4.72000254694063   |
| C  | -0.38323702856605 | -0.30639028643971  | -1.961177720358378 |
| C  | -2.18024592359517 | 0.66976834325204   | -1.03729594648603  |
| H  | 0.56732840188641  | -2.06177719410121  | -3.89138515342721  |
| C  | 1.30819187143911  | -1.43003656132278  | -3.40087726922407  |
| C  | 1.99981523119424  | -0.9869782496161   | -1.34702601789447  |
| C  | 0.8993588715539   | -1.07770606450071  | -1.97295643895783  |
| H  | 2.93789207846860  | -0.75102201339301  | -1.33972250329046  |
| H  | 2.25346062247416  | -1.97030036325810  | -3.39938932564491  |
| H  | 1.76912086007254  | 0.07345528578022   | -0.31671332771002  |
| H  | -2.69766312708101 | -4.54716144542497  | 2.37646268701908   |
| C  | -2.16444142474742 | -4.203172346349307 | 1.48685577625794   |
| C  | -0.13102560613211 | -5.36407494766778  | 2.27237825979539   |
| C  | -0.66607613801055 | -4.00947732258625  | 1.80243281204092   |
| H  | 0.93391498822857  | -5.31751388608855  | 2.49649489684124   |
| H  | -2.63905559968658 | -3.28661274875960  | 1.14066252724650   |
| H  | -0.29123130772465 | -6.12729826360798  | 1.51055139983676   |
| H  | 0.12422241038832  | 2.02857218871513   | 5.42629847621578   |
| C  | -0.06849154989346 | 0.95702801050559   | 5.35951680990552   |
| C  | 1.50849862513968  | 0.75473048042251   | 3.45069101651799   |
| C  | 0.06637237085330  | 4.07031412424145   | 3.91816513546436   |
| H  | 1.72325787343552  | 1.82510419422429   | 3.47807088196761   |
| H  | 0.65426472106947  | 0.45597445734437   | 6.00276812957997   |
| H  | 1.67657060646882  | 0.40672693692448   | 2.43145210870752   |
| C  | -2.04459934990511 | 2.05942855447271   | -0.32586323961355  |
| C  | -3.25057880732101 | 2.95847017073958   | -0.60562638289101  |
| C  | -0.81025384370227 | 2.80099608680788   | -0.87560109245964  |
| H  | -4.16893093199647 | 2.58581901030555   | -0.16029006701058  |
| H  | -0.74496202429797 | 3.77135596578536   | -0.38350902726033  |
| H  | -3.07057529870652 | 3.95245889423546   | -0.19685898614924  |
| H  | -0.87462542947559 | 2.97586010098551   | -1.95158225900849  |
| H  | -3.40845768186729 | 3.08827043072573   | -1.67762034838319  |
| H  | 0.11731584142520  | 2.27521761000166   | -0.66138861453452  |
| H  | 2.14863384026126  | 0.72655555192973   | -1.91230800711332  |
| H  | 1.45484989381428  | -0.52977803208431  | -4.00091466546442  |
| H  | -0.65701543680862 | -5.69941171770656  | 3.16844762341229   |
| H  | -2.28769196824230 | -4.95447541285231  | 0.70447346259376   |
| H  | 2.22087566527563  | 0.23759931253445   | 4.09465551915579   |
| H  | -1.06378129676974 | 0.75983742155038   | 5.76039417415739   |
| H  | 0.22168380705949  | -1.76652034644704  | 5.87056089278727   |
| Al | -0.87122432810393 | -0.85504266964433  | 0.98082385786457   |
| C  | -3.17874098777172 | -0.38930408199809  | -0.42121493246501  |
| O  | -2.70598613006278 | -0.86112076860416  | 0.77996255747636   |
| C  | -2.28624912145956 | 0.75679582691004   | -2.52451631126656  |
| H  | -3.10001578080516 | 1.21869353252401   | -3.06503269127981  |
| C  | -1.20756851033262 | 0.17668012231377   | -3.06775314851563  |
| H  | -0.98130903339405 | 0.06026359937631   | -4.11624205946063  |
| N  | -0.93150430581873 | -0.01593603893421  | -0.84143366347063  |
| Li | -3.75805758267426 | 0.40777014900136   | 1.94249184560316   |
| C  | -0.88673145071319 | 1.22167188082927   | 3.03346752401022   |
| C  | -1.77723662793074 | 2.21658306276541   | 3.37020717074022   |
| H  | -1.94509414102540 | 2.63165577020933   | 4.35135732575877   |
| C  | -2.39296700681404 | 2.63054510779703   | 2.16514702295358   |
| C  | -3.10467990249732 | 3.43443636641432   | 2.05695980281451   |
| C  | -1.84527808884598 | 1.86957257413348   | 1.15558458772730   |
| N  | -0.92483886843002 | 0.98968954994124   | 1.68759468779925   |

|   |                   |                   |                   |
|---|-------------------|-------------------|-------------------|
| O | -5.36322952972149 | 1.57804004889466  | 2.73820839033163  |
| O | -4.29915181954483 | -0.68936713162310 | 3.54208948022438  |
| C | -5.86818794060646 | 1.01683441393609  | 3.92376542521734  |
| H | -6.74826935910255 | 0.39444113338037  | 3.70856006834213  |
| H | -6.17877300069342 | 1.79658352938180  | 4.63198804219851  |
| C | -4.77622920566735 | 0.17845414922187  | 4.53904561803335  |
| H | -5.19481752004374 | -0.38093827913177 | 5.38588351770277  |
| H | -3.96327574640169 | 0.80819475430323  | 4.92335522966075  |
| C | -6.29086816023430 | 2.38220193846349  | 2.0608445537665   |
| H | -5.80202844636068 | 2.78472448133267  | 1.17689462781942  |
| H | -6.62648970155572 | 3.21955191892775  | 2.68233144714084  |
| H | -7.17254496293218 | 1.81199162571649  | 1.74566101703319  |
| C | -3.53815119285181 | -1.77256672896503 | 4.05918561701210  |
| H | -3.20407184781597 | -2.37108943455892 | 3.21970989217870  |
| H | -4.15913712757870 | -2.38936942018255 | 4.71680497508573  |
| H | -2.65711003790387 | -1.42867766234197 | 4.60539071705505  |
| H | -3.21664172267617 | -1.20233552093255 | -1.16705060356303 |
| N | -4.50468843972717 | 0.15642382663337  | -0.16274033872964 |
| H | -4.85372346180668 | 0.70393713816337  | -0.93866446695647 |
| H | -5.15104506306669 | -0.61548332843314 | -0.04003473280662 |

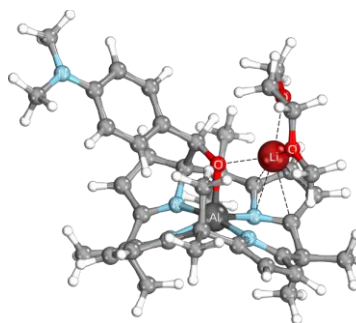

### [1]-p-dimethylaminobenzaldehyde Li(dme) isomer B

|   |                    |                   |                   |
|---|--------------------|-------------------|-------------------|
| N | 0.21810892003407   | -2.42758044505261 | 0.67638247902824  |
| C | 0.14945103699275   | -3.62102707496100 | 1.35068866521368  |
| C | 0.79760075054301   | -2.68848758376456 | -0.54263534214481 |
| C | 0.66671066810599   | -4.62424587492060 | 0.56492557331761  |
| H | 0.75175446254773   | -5.66749835817002 | 0.82318409914656  |
| C | 1.08177807512161   | -4.02725517937264 | -0.64571060959625 |
| H | 1.54955387135647   | -4.52750991069598 | -1.47918423152075 |
| N | -0.26279808746788  | -1.25380959883323 | 3.10823912863541  |
| C | 0.17389225902503   | -0.42282456003711 | 4.11151813459506  |
| C | -0.11458851953549  | -2.54559095485882 | 3.56093779840004  |
| C | 0.58180214906566   | -1.17202470415050 | 5.18770974646423  |
| C | 0.39458962603558   | -2.52753873487160 | 4.83585345137261  |
| H | 0.61951350566143   | -3.38356800852877 | 5.45159520567974  |
| C | -0.16927185041863  | -0.80021855101100 | -1.68479509309167 |
| C | -1.98600491897234  | 0.31547647029379  | -0.95165998797081 |
| H | 0.72523558506111   | -2.86502412800940 | -3.29246307509786 |
| C | 1.49407013674741   | -2.20117513743862 | -2.89646071169595 |
| C | 2.21676277944611   | -0.67776733195922 | -1.05893197345298 |
| H | 1.08867483073773   | -1.60362388500836 | -1.55244004921207 |
| C | 1.33217075896747   | -1.25765895029810 | 0.94468160051919  |
| H | 2.41113283754713   | -2.77784133656557 | -2.79037862774495 |
| H | 1.98736924398831   | -0.23200387850232 | -0.09119720758219 |
| H | -2.44055226045353  | -4.03883344571629 | 3.59732514259534  |
| C | -2.0095587621608   | -3.89131812003130 | 2.60552683457088  |
| C | 0.04889875976118   | -5.01471827253421 | 3.39604733733677  |
| C | -0.47449076259745  | -3.74208359319896 | 2.72061522644861  |
| H | 1.13342716738973   | -4.99488720579722 | 3.49705752415850  |
| H | -2.48253045013942  | -3.02198474344348 | 2.15915753647096  |
| H | -0.22845540198908  | -5.89492431533858 | 2.82068607231087  |
| H | 0.12903606254178   | 2.84141619780040  | 5.19373926342742  |
| C | 0.06133196793159   | 1.75745516101812  | 5.29764073287183  |
| C | 1.64616396753750   | 1.45413527513073  | 3.40541631426970  |
| C | 0.25469669033563   | 1.06976102758001  | 3.94630911624269  |
| H | 1.72492328225342   | 2.53321859028013  | 3.25735024109171  |
| H | 0.83511142401275   | 1.44963652089255  | 5.99994775755092  |
| H | 1.85207957567896   | 0.97006469022576  | 2.45099112694846  |
| C | -1.88282737835898  | 1.80700848293061  | -0.48807873185710 |
| C | -3.13026550018726  | 2.56813936364300  | -0.93612654691185 |
| C | -0.66489475037577  | 2.49942834728908  | -1.12113900475725 |
| H | -4.05630293069270  | 2.13346716639102  | -0.56031402072852 |
| H | -0.63713250351980  | 3.53850475641998  | -0.79221446318008 |
| H | -3.08755460153787  | 3.59976524446136  | -0.58779365151310 |
| H | -0.71208723591709  | 2.49439823725421  | -2.21164494873093 |
| H | -3.19518328476058  | 2.60544817378696  | -2.02390718717959 |
| H | 0.27226449019407   | 2.04108353401853  | -0.81190139949018 |
| H | 2.47080421877268   | 0.13328395255195  | -1.76567487354106 |
| H | 1.68923583598725   | -1.41703688812367 | -3.63022623791248 |
| H | -0.38932071895132  | -5.12697974640927 | 4.38803875245955  |
| H | -2.25604037997468  | -4.75867668347168 | 1.99162702311200  |
| H | 2.41935199897320   | 1.14057697236354  | 4.10770356355238  |
| H | 0.90459171937209   | 1.51352895726338  | 5.74148542891435  |
| H | 0.97927839979016   | -0.79923796905096 | 6.11889391848730  |
| A | 0.666660674484557  | -0.81276713201878 | 1.28919139990354  |
| C | -0.30452356423615  | -0.51138262976569 | -0.12663924244217 |
| C | -0.500422636189162 | -0.84244713215510 | -1.11574729323222 |
| C | -2.05837038700835  | 0.15681924501125  | -2.43146407615172 |
| H | -0.87745033882394  | 0.50759720591067  | -3.04081932456151 |
| C | -3.9697734886596   | -0.49329311990903 | -2.86408434242154 |
| H | -0.73542398789513  | -0.78139400079903 | -3.87632327778937 |
| H | -0.50522078789505  | -0.78139400079903 | -3.87632327778937 |
| H | -0.6666220903441   | 0.31426849297788  | 2.59674654607137  |
| C | -0.78574576554433  | 1.54851827108885  | 2.97820835750025  |
| C | -1.80898490301091  | 2.45356831925206  | 3.17066357387107  |
| C | -2.05964023352543  | 2.96258966416203  | 4.08737113542177  |
| C | -2.41048901267436  | 2.65289449547495  | 5.09117873638296  |
| C | -3.20252352546918  | 3.35072982898286  | 1.67690806581357  |
| C | -1.72416329225908  | 1.86011134022413  | 1.00772995915407  |

|   |                   |                   |                   |
|---|-------------------|-------------------|-------------------|
| N | -0.74760028952547 | 1.15081063277714  | 1.66959797906837  |
| O | -5.14694162138950 | 0.50548643738501  | 2.47201773912588  |
| O | -3.62848164406790 | -0.90356556574501 | 4.07781036543613  |
| C | -5.5585652725626  | -0.82586696436443 | 2.71205114191716  |
| H | -5.21018026934486 | -1.48405761631962 | 1.90662223747322  |
| H | -6.65247159705399 | -0.89935908098884 | 2.75774157058450  |
| C | -4.98840335543356 | -1.24111801815251 | 4.04743573997147  |
| H | -5.13304038930768 | -2.32160955359442 | 4.17785783734925  |
| H | -5.52495168412191 | -0.73393880222284 | 4.86181166307648  |
| C | -5.94630785317147 | 1.19381953181302  | 1.54406649883432  |
| H | -5.1086696999427  | 2.18072327837903  | 1.40186842518208  |
| H | -6.97013435670585 | 1.31196723307533  | 1.91442059751677  |
| H | -5.98906503929025 | 0.68366227809520  | 0.57512578411343  |
| C | -2.98386640919425 | -1.30611898343268 | 5.27004340025993  |
| H | -1.94692888649892 | -0.98513845798460 | 5.22395166961905  |
| C | -3.00340848855367 | -2.39392762641737 | 5.37589882261154  |
| H | -3.46625164222781 | -0.85378581563162 | 6.14387408257540  |
| C | -3.89873884014913 | 0.15447258344987  | 0.00238953839612  |
| C | -3.52212766969497 | -1.71142115606358 | -0.89976004632628 |
| C | -4.43415626618302 | -3.87936779346084 | -2.49225519805763 |
| C | -2.83548567977244 | -2.92008990390781 | -0.93167139807301 |
| C | -4.67605777439698 | -1.61618170790620 | -1.66641383622863 |
| C | -5.13089592730008 | -2.66170128944654 | -2.45089236925222 |
| C | -3.27167073820906 | -3.97544668988879 | -1.71023545704280 |
| H | -1.93802616390370 | -3.06452920672903 | -0.34635607311287 |
| H | -5.24638432996422 | -0.69150578440854 | -1.66290991701567 |
| H | -6.03718131563520 | -2.52074899752136 | -3.02259516379264 |
| H | -2.68388854796715 | -4.88213912640439 | -1.69611124512067 |
| N | -4.87522247453884 | -4.93409630090177 | -3.25540581180522 |
| C | -4.05862846791127 | -6.11290916720253 | -3.37495581136988 |
| H | -3.07985577398929 | -5.91330315100886 | -3.82643471141185 |
| H | -4.5802768347356  | -6.84410366303386 | -3.9904643908576  |
| H | -3.88639873405832 | -6.58355800363170 | -2.4405471105632  |
| H | -5.97449346763744 | -4.74192751323986 | -4.16131024610504 |
| H | -5.77804819986069 | -3.97188138572445 | -4.91694726180299 |
| H | -6.89101645795144 | -4.46370548109991 | -3.63378002238259 |
| H | -6.17984629414199 | -5.67224111874685 | -4.68533971933545 |

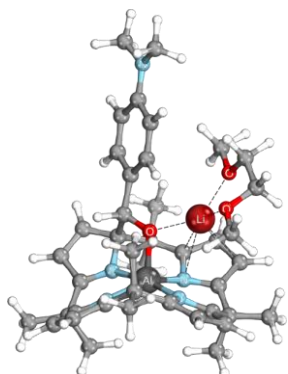

**[1]-*p*-dimethylaminobenzaldehyde Li(dme) isomer A**

|   |                   |                   |                   |
|---|-------------------|-------------------|-------------------|
| N | -0.28822476186392 | -2.31526317686536 | 0.04921846182205  |
| C | -0.41949955931786 | -3.58954285090142 | 0.53867194243575  |
| C | 0.36078830161668  | -2.41775513917446 | -1.15839416907434 |
| C | 0.13119129963583  | -4.48511988368262 | -0.34626099874325 |
| H | 0.17346148427080  | -5.55686568667129 | -0.23831164042998 |
| C | 0.63059463769546  | -3.73488119513144 | -1.43285849136425 |
| H | 1.13700620610890  | -4.12494564321886 | -2.30186941456945 |
| N | -0.64374961526951 | -1.54049214502090 | 2.65180540647331  |
| C | -0.19430647029725 | -0.94671079647490 | 3.80439141226937  |
| C | -0.71831597360700 | -2.89422045719920 | 2.89003593140784  |
| C | -0.00742209366255 | -1.90359380275765 | 4.77112190182524  |
| C | -0.34642262125533 | -3.14605093276702 | 4.18870242470704  |
| H | -0.29927593973238 | -4.11030847234146 | 4.66911764478187  |
| C | -0.40806816606422 | -0.28401455420122 | -1.97500229341653 |
| C | -2.11095749740882 | 0.88610018796610  | -1.08296049021850 |
| H | 0.34919762172170  | -2.13733170369944 | -3.89789243005037 |
| C | 1.15597961125536  | -1.60878108626917 | -3.38969696548000 |
| C | 1.96075380299624  | -0.48395554336294 | -1.31570953104604 |
| C | 0.76819381830530  | -1.21019584508069 | -1.96849358861821 |
| H | 2.81657349809354  | -1.15759714983273 | -1.28621545579674 |
| H | 2.02265774827534  | -2.26769122132770 | -3.37142139396288 |
| H | 1.74500737925256  | -0.1808060639105  | -0.29125265280263 |
| H | -3.19681188076627 | -4.09366692951868 | 2.52113774086634  |
| C | -2.66842024703896 | -3.83165466242976 | 1.60108371680850  |
| C | -0.80370814819195 | -5.29613289608789 | 2.29315968692474  |
| C | -1.14304105843020 | -3.87858876487614 | 1.82960901918749  |
| H | 0.26592417967121  | -5.41862214497907 | 2.45944000687158  |
| H | -3.01616557967166 | -2.85000200837282 | 1.28471471367350  |
| H | -1.12280644766608 | -6.02899800583599 | 1.55172221118309  |
| H | 0.35982336585298  | 2.06497109451087  | 5.37089980444610  |
| C | 0.081666911011007 | 1.01208496317482  | 5.30730639549763  |
| C | 1.618516580324395 | 0.69601843499544  | 3.37894023719982  |
| C | 0.16658091508414  | 0.51347195239928  | 3.86573201113168  |
| H | 1.90746561280505  | 1.74896011657246  | 3.9691437283135   |
| H | 0.76626617939956  | 0.45699910532093  | 5.94761597831605  |
| H | 1.74712574838402  | 0.33190158191051  | 2.35945101513021  |
| C | -1.84039274785939 | 2.25659006788956  | -0.37356133213718 |
| C | -2.96730018910790 | 3.25074588633854  | -0.64332069962171 |
| C | -0.55018022895817 | 2.88508309952095  | -0.93768745803467 |
| H | -3.92808291698684 | 2.91510728265481  | -0.26405337661465 |
| H | -0.39186535350726 | 3.84672360598430  | -0.44914873531987 |
| H | -2.73541332578121 | 4.21162061813672  | -0.18393022587686 |
| H | -0.6117131329464  | 3.06450630674781  | -2.01288155761823 |
| H | -3.07612395991271 | 3.43677224836256  | -1.71299593266948 |
| C | 0.32954056031293  | 2.27777884119935  | -0.73535792303001 |
| H | 2.24361254621572  | 0.40990013306704  | -1.87719295290046 |
| H | 1.42974047504176  | -0.73372743715703 | -3.98220093477795 |

|    |                    |                   |                   |
|----|--------------------|-------------------|-------------------|
| H  | -1.32602991025671  | -5.53212026739951 | 3.22090560755532  |
| H  | -2.95402433148753  | -4.54846472173586 | 0.82898572335590  |
| H  | 2.30140625427956   | 0.13372926578251  | 4.01668909723640  |
| H  | -0.92381368845039  | 0.89614628385440  | 5.71441676268074  |
| H  | 0.35272189019538   | -1.74478442878766 | 5.77566092535585  |
| Al | -0.97237864693470  | -0.74199697210102 | 0.95147833046050  |
| C  | -3.20403839890206  | -0.10308820364590 | -0.47894469378951 |
| O  | -2.79746347933668  | -0.48180497209925 | 0.79682205574437  |
| C  | -2.16856074627623  | 0.9774053076924   | -2.57367268481953 |
| H  | -2.89877081148523  | 1.53362559002747  | -3.14038032367616 |
| C  | -1.15417822447842  | 0.27435108093665  | -3.09504742796715 |
| H  | -0.92512549408029  | 0.12870729962082  | -4.13911709500077 |
| N  | -0.93121434577694  | 0.08203904911074  | -0.86436254083570 |
| Li | -3.32357225789015  | 0.68623406085268  | 2.32901185907815  |
| C  | -0.73714837584092  | 1.33290212720879  | 2.99090458320125  |
| C  | -1.52673232087103  | 2.41132517576490  | 3.32677712136009  |
| H  | -1.65442266171062  | 2.84260000366936  | 4.30676141026532  |
| C  | -2.09522804907131  | 2.88353822958394  | 2.11880393687803  |
| H  | -2.72485305220406  | 3.75321134287840  | 2.01468185985033  |
| C  | -1.63164321683996  | 2.0684911733163   | 1.10935381335957  |
| N  | -0.80436905613669  | 1.10350042837455  | 1.64448475624226  |
| O  | -0.500070709745521 | 1.87064568698282  | 2.85232003733532  |
| O  | -4.11099670671820  | -0.42939196978406 | 3.84235580917226  |
| C  | -5.81751773948905  | 1.19434063086710  | 3.77323253743887  |
| H  | -6.54298459180558  | 0.5576436452146   | 3.24962935002446  |
| H  | -6.38363097588712  | 1.90367234041372  | 4.39240560236619  |
| C  | -4.92708450202757  | 0.6666338074508   | 4.66206149783657  |
| H  | -5.5558044768338   | -0.25420292670858 | 5.31492287678318  |
| H  | -4.31537147063858  | 1.0111108724264   | 5.30805646657803  |
| C  | -5.71385172694236  | 2.79394430299761  | 2.06287919372711  |
| H  | -4.99750368498220  | 3.31658424403671  | 1.43632356452630  |
| H  | -6.22706744472827  | 3.53073997591894  | 2.69071722226555  |
| H  | -6.44737899757129  | 2.29715248547740  | 1.42244571005030  |
| C  | -3.42957200848548  | -1.44308681798032 | 4.56404834576318  |
| H  | -2.83449205495252  | -2.01817713351047 | 3.86300655505061  |
| H  | -4.14845782789494  | -2.10714559394298 | 5.05512846710745  |
| H  | -2.75820046465858  | -1.01934033627464 | 5.31392005629851  |
| H  | -3.12816389221891  | -0.96851384479044 | -1.16001863253698 |
| C  | -4.67270440041569  | 0.27486065046818  | -0.48366667494657 |
| C  | -7.50828756432093  | 0.63772599659362  | -0.55234853146024 |
| C  | -5.52105302476900  | -0.37665028878483 | 0.41077768019689  |
| C  | -5.28893026760775  | 1.08710735106170  | -1.42894210853390 |
| C  | -6.65937865737460  | 1.27728992761992  | -1.46745973492611 |
| C  | -6.89412658403040  | -0.2088424198575  | 0.38312870700499  |
| H  | -5.10770700541703  | -1.06259905044426 | 1.13846770994749  |
| H  | -4.70385723276232  | 1.60422545192477  | -2.17506362914374 |
| H  | -7.05898175199720  | 1.92739873177569  | -2.23250204789232 |
| H  | -7.48591867468788  | -0.76940405792409 | 1.09332735457544  |
| N  | -8.86900732334076  | 0.83655285403234  | -0.56653460962719 |
| C  | -9.70820521202515  | 0.00763758417187  | 0.25865606279511  |
| H  | -9.46304494155148  | 0.12037036806637  | 1.31732144618828  |
| H  | -9.64192300700030  | -1.05828959010488 | 0.01110807097181  |
| H  | -10.74517692448784 | 0.31270497760440  | 0.14076466906010  |
| C  | -9.46521301638281  | 1.53722104051489  | -1.67398306633981 |
| H  | -9.08810752850488  | 2.55965393632661  | -1.75007255741044 |
| H  | -10.53945750660020 | 1.60743044138414  | -1.52142861312706 |
| H  | -9.29579337220627  | 1.04390760629457  | -2.63826759184315 |

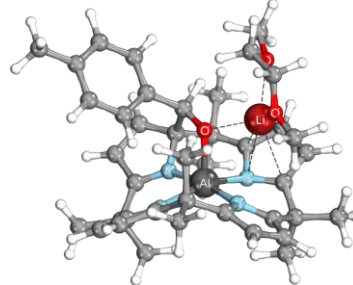

**[1]-*p*-methylbenzaldehyde Li(dme) isomer B**

|   |                   |                   |                    |
|---|-------------------|-------------------|--------------------|
| N | 0.10701365572291  | -2.38917523502460 | 0.46956945842004   |
| C | 0.01598412696605  | -3.61817087244370 | 1.07466781313587   |
| C | 0.65462388181426  | -2.59470921350735 | -0.77464712052406  |
| C | 0.48710416721251  | -4.58760132135654 | 0.22063694589520   |
| H | 0.54583237803871  | -5.64628419291147 | 0.41548955908945   |
| C | 0.89596269928437  | -3.93261853794918 | -0.96172106824275  |
| H | 1.33180880496228  | -4.39617236095428 | -1.83283853712750  |
| N | -0.30241390480547 | -1.34567077451374 | 2.97465663551235   |
| C | 0.17740743397025  | -0.58495859399987 | 4.01386811260247   |
| C | -0.17407354021965 | -2.66502826119225 | 3.34782783600007   |
| C | 0.59234324701732  | -1.40517897285402 | 5.03396785786663   |
| C | 0.36486117387013  | -2.73310713098832 | 4.60854046094567   |
| H | 0.58364956353787  | -3.62857883690103 | 5.16772315540619   |
| C | -0.27813180530931 | -0.61905575313326 | -1.78641449631261  |
| C | -2.03265255534475 | 0.49943070832288  | -0.95635429595453  |
| H | 0.53528498081304  | -2.60760814162055 | -3.52898955602495  |
| C | 1.32758260450976  | -1.98837251674841 | -3.10771178097022  |
| C | 2.12037570552113  | -0.59500015045731 | -1.19736501328686  |
| C | 0.95997862582878  | -1.46056571299583 | -1.72427125136341  |
| H | 3.02131328347972  | -1.20439175582252 | -1.13295778333324  |
| H | 2.22999193297339  | -2.59534067474429 | -3.051056793579594 |
| H | 1.91884233497114  | -0.08461196378690 | -0.20162257971077  |
| H | -2.53662566350314 | -0.09753891877737 | 3.35334921438093   |
| C | -2.11895381436504 | -3.90644905616279 | 2.36136738925922   |
| C | -0.0771916971621  | -5.12038772193437 | 3.03965348213881   |
| C | -0.5820663813152  | -3.8018901804303  | 2.44910531328106   |
| H | 1.00982044820734  | -5.13592754245136 | 3.16949179329688   |
| H | -2.58215428929907 | -3.00218233591767 | 1.97422552360306   |
| H | -0.38872665055346 | -5.96256883078746 | 2.260531424769397  |
| H | 0.22175684856245  | 2.60822314955303  | 5.491293929849686  |
| C | 0.13021455607014  | 5.12757034183269  | 5.329690297927693  |
| C | 1.6809566529574   | 1.29897303847168  | 3.39694275501011   |

|    |                   |                    |                    |
|----|-------------------|--------------------|--------------------|
| C  | 0.28916299731033  | 0.91272882133583   | 3.93604389412662   |
| H  | 1.78135977545335  | 2.38303721229944   | 3.31199871133635   |
| H  | 0.90579388769155  | 1.15465661754956   | 6.00014061660346   |
| H  | 1.86157338921152  | 0.86845231119090   | 2.41218967173474   |
| C  | -1.89771447709843 | 1.95975366029598   | -0.41181143135793  |
| C  | -3.13042730673059 | 2.77894977707509   | -0.79330058251302  |
| C  | -0.67159705779401 | 2.65251161811660   | -1.02819733753094  |
| H  | -4.06221918153828 | 2.35290772017573   | -0.42158197356019  |
| H  | -6.0954921408056  | 3.67053942058664   | -0.64303892247551  |
| H  | -3.04977076422946 | 3.78878570292622   | -0.39193869027217  |
| H  | -0.73688016264427 | 2.70965632943070   | -2.1162555328724   |
| H  | -3.21498710064582 | 2.87636032189995   | -1.87596800510933  |
| H  | 0.25734817424016  | 2.15278275297495   | -0.76133768967131  |
| H  | 2.32223934291779  | 0.25066709709058   | -1.85904169158362  |
| H  | 1.53276981713371  | -1.16796926255706  | -3.79780949534504  |
| H  | -0.49718385300194 | -5.28162380772384  | 4.03311648295772   |
| H  | -2.40456892401141 | -4.73262657050843  | 1.70699527142580   |
| H  | 2.45740911738730  | 0.92759706845459   | 4.06662425489964   |
| H  | -0.83526465109960 | 1.27209535589600   | 5.77091705420258   |
| H  | 0.1982836585641   | -1.09678731946677  | 5.97534954350212   |
| Al | -0.72016897780725 | -0.79130441165147  | 1.19091586152050   |
| C  | -3.10556514180453 | -0.34103058346036  | -0.15478208336049  |
| C  | -2.55904105094155 | -0.76844978517669  | 1.05000037528315   |
| C  | -2.15396074914936 | 0.42803288932210   | -2.44131255719965  |
| H  | -2.92790372605269 | 0.83596705807813   | -0.301416549487229 |
| C  | -1.09139667743545 | -0.22407914258081  | -2.93062473279652  |
| H  | -0.88234282662545 | -0.45964250248998  | -3.96200955458086  |
| N  | -0.80153963773869 | -0.19136144497362  | -0.69659180117635  |
| Li | -3.05329026322084 | 0.30019973387053   | 2.62338120072776   |
| C  | -0.75348717687509 | 1.47190618006009   | 3.01459570382611   |
| C  | -1.74443446829807 | 2.39491797640759   | 3.27495263880315   |
| H  | -1.96575076483700 | 2.85846245693886   | 4.22315873397773   |
| C  | -2.35947135464241 | 2.68429356180405   | 2.02949247637776   |
| C  | -3.13347426652045 | 3.41670876933483   | 1.85829784828615   |
| C  | -1.71236200283979 | 1.92304463383171   | 1.08139495440416   |
| N  | -0.7479356688216  | 1.14785919317378   | 1.68496404593096   |
| O  | -5.12261512224264 | 0.57859392037127   | 2.55553385182939   |
| O  | -3.63001845541587 | -0.97237711350773  | 4.05006957032937   |
| C  | -5.59061572152694 | -0.74136627636188  | 2.74843560196509   |
| H  | -5.29461294030036 | -1.37785870226311  | 1.90538422099724   |
| H  | -6.68511279305742 | -0.76682635447490  | 2.82151239547834   |
| C  | -5.00577151311310 | -1.24268610636834  | 4.04709012527959   |
| H  | -5.19946633400551 | -2.31961962005251  | 4.13591653737457   |
| H  | -5.49301654216858 | -0.74629665081631  | 4.89788211842173   |
| C  | -5.91726078314506 | 1.34759505033465   | 1.68870941238516   |
| H  | -5.44066732348048 | 2.31953142294875   | 1.58047536950943   |
| H  | -6.92278496875316 | 1.49242424345022   | 2.09747030107001   |
| H  | -6.01312564539221 | 0.88881214138267   | 0.69802102013036   |
| C  | -2.97185620172498 | -1.45804429780710  | 5.20377752535412   |
| H  | -1.92406239872182 | -1.17701425341212  | 5.14440312625116   |
| H  | -3.03496499141373 | -2.54795551926505  | 5.25851767545473   |
| H  | -3.41217613084246 | -1.02933807599899  | 6.11099512509649   |
| H  | -3.94529511678826 | 0.34105699972163   | 0.03415676290651   |
| C  | -3.64769835727971 | -1.47685641198068  | -0.99135365051779  |
| C  | -4.66485872602682 | -3.50333740718814  | -2.66520071040981  |
| C  | -3.00181691940439 | -2.70526395796080  | -1.09153982423117  |
| C  | -4.81274572398856 | -1.28574631553285  | -1.72378331692859  |
| C  | -5.31458239941267 | -2.28033300425877  | -2.55021576012991  |
| C  | -3.50374268603100 | -3.69446961276635  | -1.92010667730309  |
| H  | -2.10192984100635 | -2.90876185190357  | -0.52812930367593  |
| H  | -5.34175650229647 | -0.33985177485685  | -1.65389109667813  |
| H  | -6.22686663591927 | -2.10271609437761  | -3.10767990569994  |
| H  | -2.97315025445516 | -4.63745389545310  | -1.98317384938435  |
| C  | -5.20221341928394 | -4.59598682694644  | -3.54253434767601  |
| H  | -4.42794448441964 | -5.00053174729940  | -4.19537009296626  |
| H  | -6.01574095780360 | -4.24200972229001  | -4.17485421500979  |
| H  | -5.58704431610909 | -5.427716988933242 | -2.94891320607368  |

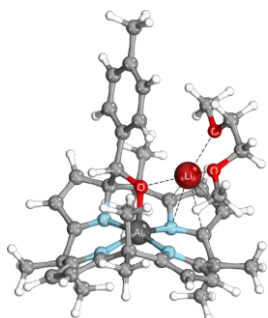

**[1]-*p*-methylbenzaldehyde Li(dme) isomer A**

|   |                   |                   |                   |
|---|-------------------|-------------------|-------------------|
| N | -0.20998517114460 | -2.29778538545707 | 0.03897937915237  |
| C | -0.29986333455034 | -3.57982982787589 | 0.51759272985978  |
| C | 0.44735097543886  | -2.36775114845021 | -1.16647149177501 |
| C | 0.28433460695969  | -4.44849929056318 | -0.37255187053262 |
| H | 0.36275081928009  | -5.51906434559173 | -0.27345077511544 |
| C | 0.76245988659309  | -3.67260523497646 | -1.45075727342929 |
| H | 1.28592875167535  | -4.03805066457723 | -2.32034028646799 |
| N | -0.6045009869606  | -1.55519821229637 | 2.64475640659513  |
| C | -0.18006131061073 | -0.95448101968361 | 3.80358730605267  |
| C | -0.63282177192913 | -2.91256632631509 | 2.87282708445704  |
| C | 0.03581209041832  | -1.91145798827493 | 4.76398002754980  |
| C | -0.25770344136421 | -3.16063763895529 | 4.17117465505214  |
| H | -0.17932876285143 | -4.12611769665257 | 4.64495018219157  |
| C | -0.38787637913248 | -0.25431805828245 | -1.96873264707225 |
| C | -2.13764977967796 | 0.84760583882308  | -1.07877481598834 |
| H | 0.44702064326484  | -2.06032659466891 | -3.90357687704031 |
| C | 1.23170551192833  | -1.51043964786603 | -3.38355022756203 |
| C | 1.98157497293718  | -0.37927513702359 | -1.29223278420878 |
| C | 0.81982459652867  | -1.13918006812810 | -1.96175542115479 |
| H | 2.85942144586020  | -1.02385834253219 | -1.26181475297291 |
| H | 2.11948106232784  | -2.14060590416390 | -3.36468583934201 |

|    |                    |                   |                   |
|----|--------------------|-------------------|-------------------|
| H  | 1.74774579715403   | -0.09353042637942 | -0.26672009765206 |
| H  | -3.06696258634324  | -4.19228362140770 | 2.48393489375403  |
| C  | -2.54329075429973  | -3.90775473621358 | 1.56798317988310  |
| C  | -0.63114849976362  | -5.31149636243688 | 2.25819409080485  |
| C  | -1.01822693716637  | -3.90343279272391 | 1.80333927448206  |
| H  | 0.44137633337690   | -5.39715224139733 | 2.42884892672329  |
| H  | -2.9225582247891   | -2.93697838146507 | 1.25438594328500  |
| H  | 0.92046886270842   | -6.04960023359738 | 1.50981738761514  |
| H  | 0.27772526546599   | 2.06205963264978  | 5.38253561240093  |
| C  | 0.03157354567776   | 1.00176433317065  | 5.32096235825232  |
| C  | 1.58029194134021   | 0.74834855991460  | 3.39300044242659  |
| C  | 0.13390049385676   | 0.51610390142873  | 3.87604125514975  |
| H  | 1.83556577943788   | 1.80978825278581  | 3.41926478388166  |
| H  | 0.73210098427470   | 0.46326453664119  | 5.95813983865511  |
| H  | 1.72225754505806   | 0.39590602018579  | 2.37130541263773  |
| C  | -1.92245714241292  | 2.22076613914235  | -0.35654085989637 |
| C  | -3.08942084010992  | 3.16953893435947  | -0.61896730237380 |
| C  | -0.65815808782093  | 2.90492495877722  | -0.91395843030970 |
| H  | -4.03456752655498  | 2.79220141376497  | -0.2392269795811  |
| H  | -0.53561196788155  | 3.86529258683112  | -0.41299254587500 |
| H  | -2.89687488318569  | 4.13629722828593  | -0.15398852045869 |
| H  | -0.72818358320793  | 3.09562334512795  | -1.98663870444244 |
| H  | -3.20845500435810  | 3.35802911217140  | -1.68703095358773 |
| H  | 0.24405245346157   | 2.32849964805376  | -0.72049403126314 |
| H  | 2.23861915647048   | 0.52899561824213  | -1.8428660746295  |
| H  | 1.48123904507674   | -0.62105504636527 | -3.96533003259095 |
| H  | -1.14907106476371  | -5.57285177309237 | 3.18156959925361  |
| H  | -2.80082929732070  | -4.62977576552911 | 0.79092322700037  |
| H  | 2.7988398072502    | 0.20365559363458  | 4.02797737158640  |
| H  | -0.97010133691618  | 0.85241379371379  | 5.72643744739654  |
| H  | 0.3668986136475    | -1.74800980179374 | 5.77103036315487  |
| Al | -0.9509090505892   | -0.75744224853692 | 0.94910896624380  |
| C  | -3.19768626974830  | -0.1837251380079  | -0.48890108951028 |
| O  | -2.78509751631262  | -0.55862484108149 | 0.7847177979185   |
| C  | -2.18732157541156  | 0.95001261077797  | -2.56973691200901 |
| H  | -2.92998947262775  | 1.48721061711111  | -3.13855062161768 |
| C  | -1.14532237606996  | 0.28762818476259  | -3.08937935666285 |
| H  | -0.90336290107183  | 0.16037620430259  | -4.13291871445699 |
| N  | -0.93161524920143  | 0.08336129756003  | -0.85887736092778 |
| Li | -3.33081987396331  | 0.58370438585992  | -2.33587785213717 |
| C  | -0.79312695643478  | 1.31311230711307  | 3.00479021328089  |
| C  | -1.61069103975756  | 2.36938808649520  | 3.3442335494438   |
| H  | -1.74971031487998  | 2.7941075993529   | 4.32547248105058  |
| C  | -2.19202122905319  | 2.82988777411356  | 2.13814619475634  |
| H  | -2.84598588966060  | 3.68171721001869  | 2.03725051637475  |
| C  | -1.70826178862549  | 2.03015676397171  | 1.12559117834476  |
| N  | -0.85485396955559  | 1.08642939575613  | 1.65766388090803  |
| O  | -0.50972179636335  | 1.71640512006137  | 2.85451298346644  |
| O  | -0.09910587312186  | -0.56237966142509 | 3.83273343300570  |
| C  | -5.85601752007384  | 1.00742879197908  | 3.76917382788732  |
| H  | -6.55954297405769  | 0.35007157287484  | 3.24115554651616  |
| H  | -6.44668286868443  | 1.69332008613856  | 4.39161158212940  |
| C  | -4.94110128690789  | 0.20383562666475  | 4.65511935090138  |
| H  | -5.55025057664031  | -0.43971358920421 | 5.30353255868686  |
| H  | -4.35093681153263  | 0.86421862613951  | 5.30503048736628  |
| H  | -5.79861622692990  | 2.52992723461327  | 2.07706079192716  |
| H  | -5.09613893731253  | 3.19376275303477  | 1.47150946468005  |
| H  | -6.34745617129099  | 3.33151054254018  | 2.71400375872321  |
| H  | -6.50581352042729  | 2.11978997948822  | 1.41610473521814  |
| C  | -3.39469461160834  | -1.56431069367600 | 4.54955406092165  |
| H  | -2.78519329886307  | -2.12089768402589 | 3.84602306147566  |
| H  | -4.09865518205805  | -2.24800408327849 | 5.03502568657950  |
| H  | -2.73473759526724  | -1.12904793965846 | 5.30274731627596  |
| H  | -3.09456785186465  | -1.03947927919793 | -1.17830670939750 |
| C  | -4.68235752613019  | 0.13441588266697  | -0.50241493318225 |
| C  | -7.50695858379242  | 0.39092836214062  | -0.5885348942335  |
| H  | -5.50047695298889  | -0.53421646724786 | 0.40651828386481  |
| C  | -5.31328606870315  | 0.92167348138793  | -1.46271409201891 |
| H  | -6.691302885858775 | 1.05560516752106  | -1.49905916721010 |
| C  | -6.88151723352142  | -0.40705923293961 | 0.36100838767287  |
| H  | -5.06048043037269  | -1.18872435075579 | 1.14673103212204  |
| H  | -4.73706202268393  | 1.45298758443518  | -2.20504041804742 |
| H  | -7.13884211545049  | 1.68524764814881  | -2.25946060821528 |
| H  | -7.48323500822169  | -0.95757907979437 | 1.075405060484866 |
| C  | -9.00010640065840  | 0.52585561090053  | -0.64743661744558 |
| H  | -9.31216752055348  | 1.56943936491234  | -0.58433644113773 |
| H  | -9.48391547599429  | -0.01264399132516 | 0.1663            |

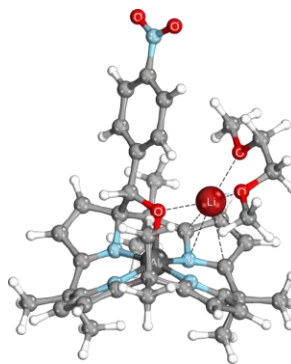[1]-*p*-nitrobenzaldehyde Li(dme) isomer

B

|    |                   |                   |                   |
|----|-------------------|-------------------|-------------------|
| C  | 0.16323183984776  | -0.62381637110527 | 3.99577884479364  |
| C  | -0.21201205143272 | -2.69480121340672 | 3.31176997480496  |
| C  | 0.57242804787005  | -1.45762069384747 | 5.00673607720162  |
| C  | 0.32996522049336  | -2.77931524646483 | 4.56995840367105  |
| H  | 0.54064344079126  | -3.68180173465187 | 5.12080338381782  |
| C  | -0.29755066618013 | -0.59706609190502 | -1.80198217153300 |
| C  | -2.04350187344697 | 0.52791781190308  | -0.96179565328785 |
| H  | 0.49282862036722  | -2.57271432753554 | -3.57131040158843 |
| C  | 1.29262402442692  | -1.97290455325250 | -3.13615297810705 |
| C  | 2.09933743782437  | -0.62030852107526 | -1.20238422401934 |
| C  | 0.92709921640033  | -1.45798521776605 | -1.74741122885299 |
| H  | 2.98816246772351  | -1.24722580094992 | -1.13941266545158 |
| H  | 2.18386088291446  | -2.59628164782741 | -3.08263117458191 |
| H  | 1.89973399472778  | -0.23310311368193 | -0.20331964524052 |
| H  | -2.58463680160452 | -4.10326058856826 | 3.33549784538182  |
| C  | -2.17944471451010 | -3.90911095761330 | 2.33964098076096  |
| C  | -0.14045718905803 | -5.14804321312403 | 2.97942420404261  |
| C  | -0.64048974249311 | -3.81952736874046 | 2.40713046590559  |
| H  | 0.94661395400420  | -5.17378937466879 | 3.04314750015997  |
| H  | -2.63860266050374 | -2.99662849665176 | 1.96709676098444  |
| H  | -0.46702911298744 | -5.98188179383635 | 2.35802850926020  |
| H  | 0.25700094455154  | 2.55974874224365  | 5.29394141876260  |
| C  | 0.15213062304057  | 1.47433052194548  | 5.32689676126531  |
| C  | 1.68626239638422  | 1.24547857279169  | 3.38302573637176  |
| C  | 0.29322020296957  | 0.87285824751272  | 3.92883774498114  |
| H  | 1.80063713105715  | 2.32875944546588  | 3.30668885789353  |
| H  | 0.92896858011186  | 1.09376346175360  | 5.98888794854773  |
| H  | 1.85550399628964  | 0.82110094870435  | 2.39348553996365  |
| C  | -1.90322257019081 | 1.98031498760001  | -0.39864776785258 |
| C  | -3.13299293055720 | 2.80796706810500  | -0.77006551673642 |
| C  | -0.67411688718737 | 2.67372165308567  | -1.00854745371740 |
| H  | -4.06718803018108 | 2.37737918300366  | -0.41008777932144 |
| H  | -0.60574644788631 | 3.68502688454977  | -0.60986507218709 |
| H  | -3.05289590118043 | 3.81052925923485  | -0.35173633984735 |
| H  | -0.74053110165232 | 2.74650325883628  | -2.09556120198337 |
| H  | -3.21304344747267 | 2.92544340428694  | -1.85160457126268 |
| H  | 0.25234544455805  | 2.16527056053206  | -0.74964358696992 |
| H  | 2.32144067430877  | 0.22840372418680  | -1.85339822364503 |
| H  | 1.51620443625676  | -1.14673742597865 | -3.81339684526012 |
| H  | -0.54996832288696 | -5.31512509387163 | 3.97619920938317  |
| H  | -2.48214613209744 | -4.72848494489628 | 1.68424716354291  |
| H  | 2.46200207758830  | 0.85821204515852  | 4.04432952860739  |
| H  | -0.81238746368143 | 1.23381378437235  | 5.7757998591326   |
| H  | 1.0059172436126   | -1.16236547926229 | 5.94951821345821  |
| Al | -0.73710002125625 | -0.79576391706346 | 1.17650028953499  |
| C  | -3.11860067983834 | -0.31810085181572 | -0.16804159498927 |
| O  | -2.58208972548115 | -0.7603731964375  | 1.03086383726392  |
| O  | -2.16186752623081 | 0.47713562923204  | -2.44884284509325 |
| H  | -2.97070168867255 | 0.90722157819807  | -3.02016920892887 |
| C  | -1.10459030285553 | -0.17959505939897 | -2.94329739555084 |
| H  | -0.89263752797678 | -0.40030965514249 | -3.97745492274663 |
| N  | -0.81946492521995 | -0.17663025911800 | -0.70813148745530 |
| Li | -3.05938744845160 | 0.31583636775390  | 2.61796259766561  |
| C  | -0.74827205128689 | 1.45161777027051  | 3.01818945266396  |
| H  | -1.72532294563967 | 2.38571204021752  | 3.29017343943603  |
| H  | -1.93421972172767 | 2.84678726911260  | 4.24229412244871  |
| C  | -2.34534456198483 | 2.69004639155228  | 2.05050297837794  |
| C  | -3.11010984286155 | 3.43443503816154  | 1.89040592593408  |
| C  | -1.71535694030162 | 1.92578557276226  | 1.09374897008692  |
| N  | -0.75660230546347 | 1.13505360449669  | 1.86663468555395  |
| O  | -5.12171796460054 | 0.63203268359636  | 2.55332920169237  |
| O  | -3.65582577303670 | -0.96095862792301 | 4.03611061473370  |
| C  | -5.63087608165310 | -0.66851033297862 | 2.76992098758529  |
| H  | -5.37027294969876 | -1.32514740517337 | 1.93041439667533  |
| H  | -6.72409242871779 | -0.65688130076201 | 2.86048935288962  |
| C  | -5.04143332507186 | -1.17540014546978 | 4.06376252514389  |
| H  | -5.27646301218654 | -2.24216259148106 | 4.17233336703777  |
| H  | -5.49190708663213 | -0.64778024420481 | 4.91588547639227  |
| C  | -5.90994566951465 | 1.42365458618885  | 1.70093233685168  |
| H  | -5.40790229866446 | 2.38137048660196  | 1.58286391521337  |
| H  | -6.90322537694620 | 1.59726307375993  | 2.12736486377218  |
| H  | -6.03760539448178 | 0.96763003833327  | 0.71226006382659  |
| C  | -2.99852908746698 | -1.45604726969425 | 5.18732088769648  |
| H  | -1.93975738741250 | -1.22849544621185 | 5.10335028984886  |
| C  | -3.11599234448852 | -5.54002855378964 | 5.26598849980537  |
| H  | -3.39879984041938 | -0.98832960830512 | 6.09365933433066  |
| H  | -3.96592085134676 | 0.35518790689859  | 0.01900218972457  |
| C  | -3.64382073941264 | -1.44853091383624 | -1.02560347167974 |
| C  | -4.61350629588634 | -3.43244861152989 | -2.69969270936584 |
| C  | -3.00105108001777 | -2.67932861417563 | -1.1030998172537  |
| C  | -4.79203016214567 | -1.24271968405633 | -1.78672986796542 |
| C  | -5.28636643901562 | -2.22274327203252 | -2.62639206790842 |
| C  | -3.47721552774425 | -3.67095600776362 | -1.94406985833884 |
| H  | -2.12088249085834 | -2.88791065076373 | -0.51267221728517 |
| H  | -5.31479058222251 | -0.29431168040101 | -1.72389767772177 |
| H  | -6.17957235706256 | -2.05168386027980 | -3.20881362516163 |
| H  | -2.95909430679231 | -4.61712505103644 | -2.00115866592681 |
| N  | -5.12101461590019 | -4.47503492413323 | -3.58641459428957 |
| O  | -4.51347979216014 | -5.51569459663496 | -3.63090739055487 |
| O  | -6.11799795142356 | -4.22980980663576 | -4.2224902363352  |

|    |                    |                   |                   |
|----|--------------------|-------------------|-------------------|
| N  | -0.19681035729429  | -2.30289246953184 | 0.03802300822578  |
| C  | -0.27161765695236  | -3.58488779909248 | 0.52068848539590  |
| C  | 0.46832010187192   | -2.36814711630432 | -1.16374085291426 |
| C  | 0.32871334183627   | -4.44813627769587 | -0.3634996188545  |
| H  | 0.42118372211719   | -5.51716285843225 | 0.26078329138925  |
| C  | 0.80225829629177   | -3.66938682217206 | -1.44167267175725 |
| H  | 1.33572517508718   | -4.03071680967784 | -2.30683146628055 |
| N  | -0.62197067383973  | -1.55621410142261 | 2.63976611853794  |
| C  | -0.21119894395939  | -0.94597078464637 | 3.79913734346324  |
| C  | -0.62901795837283  | -2.91387813050221 | 2.87114370304586  |
| C  | 0.01720647682396   | -1.89746348180511 | 4.76184958559048  |
| C  | -0.25408433579175  | -3.15237924305827 | 4.17096150757468  |
| H  | -0.16149083280138  | -4.11516617396901 | 4.64749680107794  |
| C  | -0.38874397562161  | -0.26964159853870 | -1.97651817349082 |
| C  | -2.15566623516718  | 0.81694051781902  | -1.10066276258592 |
| H  | 0.48277250754448   | -2.06920444714619 | -3.90182817258510 |
| C  | 1.26621177089703   | -1.50695049096130 | -3.37821457894362 |
| C  | 1.97821855026654   | -0.35987686257215 | -1.28594320883908 |
| C  | 0.830664060686104  | -1.13730462442215 | -1.96003875746546 |
| H  | 2.86382023604162   | -0.99327107977220 | -1.24857633760664 |
| H  | 2.15211346616491   | -2.1250378954202  | -3.35117921179406 |
| H  | 1.73586839482750   | -0.07354689690541 | -0.2625463681889  |
| C  | -3.04361469354299  | -4.23293835020000 | 2.46746307937394  |
| C  | -2.51656491817038  | -3.94083259661230 | 1.55594525666694  |
| C  | -0.59070353798020  | -5.31488544207415 | 2.26538657925956  |
| C  | -0.99364540429668  | -3.91383417009883 | 1.80279548525805  |
| H  | 0.48160557056253   | -5.38564681626985 | 2.44378909825253  |
| H  | -2.90791180085290  | -2.97589934247950 | 1.23874503101335  |
| H  | -0.86479775740497  | -6.05963711847086 | 1.51795359067703  |
| H  | 0.19807792247845   | 2.07957372919850  | 5.38379724261670  |
| C  | -0.03888445638171  | 1.01726788301751  | 5.31177848667739  |
| C  | 1.53397502651725   | 0.77485670029978  | 3.40087335444785  |
| C  | 0.08520845019647   | 0.52823981090244  | 3.86982218849595  |
| H  | 1.77771002164305   | 1.8398833344794   | 3.42578284622487  |
| H  | 0.65773000717545   | 0.48661024300994  | 5.95947143381439  |
| H  | 1.69047146762368   | 0.41975528897839  | 2.38214183336318  |
| C  | -1.95553395695386  | 2.19692211761047  | -0.3871968356964  |
| C  | -3.13095049388540  | 3.13240622650469  | -0.66164241610501 |
| C  | -0.69608876890762  | 2.88931614503485  | -0.94544779975469 |
| H  | -4.07527503442418  | 2.75253427744386  | -0.28145151013727 |
| H  | -0.58267079014841  | 3.85255044768832  | -0.44810734935922 |
| H  | -2.95010427671395  | 4.10482875478617  | -0.20431208062059 |
| H  | -0.76540663695544  | 3.07569564803144  | -2.01878923468322 |
| H  | -3.24786534678324  | 3.31211143180890  | -1.73141824304014 |
| H  | 0.21063437680170   | 2.32143605831871  | -0.74759715284498 |
| H  | 2.22735818815952   | 0.54947725381510  | -1.83834285681767 |
| H  | 1.49801811182752   | -0.61623813472438 | -3.96112891409499 |
| H  | -1.11168786657941  | -5.57988631365563 | 3.18591286014163  |
| H  | -2.75711747465854  | -4.66714391618467 | 0.77754589950609  |
| H  | 2.23232571865443   | 0.24000647100639  | 4.04529285297222  |
| H  | -1.04459719840422  | 0.8600586918918   | 5.70466215410740  |
| H  | 0.36258299689597   | -1.72670423567906 | 5.76953789312762  |
| Al | -0.95963988665538  | -0.77188631472667 | 0.93970267290474  |
| C  | -3.20792388106622  | -0.21634125149306 | -0.50249614839506 |
| O  | -2.79837470829643  | -0.58587050799196 | 0.76868992090905  |
| C  | -2.19827193741629  | -0.91210211293185 | -2.59351570329629 |
| H  | -2.93787616059668  | 1.4463474137359   | -3.17086693229588 |
| C  | -1.14524445273990  | 0.26095627371596  | -3.10378170958158 |
| H  | -0.89321040373346  | 0.1362925640350   | -4.14522037600375 |
| N  | -0.94500116040758  | 0.06340139518677  | -0.87123750095796 |
| Li | -3.28684404349068  | 0.57780163946544  | 2.36151737943801  |
| C  | -0.83927160060952  | 1.31517785467740  | 2.98692094368324  |
| C  | -1.65517603063421  | 2.37772666192000  | 3.31239272622581  |
| H  | -1.79707162170098  | 2.81156219164016  | 4.28912155748452  |
| C  | -2.2804462193654   | 2.83022958485567  | 2.10011013120221  |
| H  | -2.87965284624556  | 3.68259097313873  | 1.98967471065336  |
| H  | -1.74411645559918  | 2.01888046878665  | 1.09691791212903  |
| N  | -0.89602711553019  | 1.07724447568668  | 1.64129085170524  |
| O  | -0.50437643285667  | 1.68809302245916  | 2.86241559783333  |
| O  | -0.48946607773149  | -0.58452842434659 | 3.83651102395189  |
| H  | -5.82495837514796  | 1.01222621989609  | 3.82428121521003  |
| H  | -5.56692460135289  | 0.36439396171131  | 3.33836677748709  |
| H  | -6.37309814368393  | 1.72042939924072  | 4.45977505480105  |
| C  | -4.89206134794344  | 0.19983267529978  | 4.68282493555855  |
| H  | -5.48922862078811  | -0.43015256689810 | 3.55648408624959  |
| H  | -4.26909753689913  | 0.85300122324360  | 5.30867290820867  |
| C  | -5.80264502146699  | 2.62452314489208  | 2.12512201262828  |
| H  | -5.12608127799502  | 3.129062216273801 | 1.44191118460650  |
| C  | -2.54259781798207  | 3.37470671598081  | 2.782862909630260 |
| H  | -6.59891176717616  | 2.62142763367845  | 5.529449966214946 |
| H  | -8.22005052632179  | 1.280118880022464 | 3.81391031644946  |
| H  | -4.14013711855870  | -2.29804976455586 | 4.9977405980837   |
| H  | -7.24793003647790  | -1.22671386018400 | 5.29378059696334  |
| H  | -3.11172191276050  | -0.0735125537518  | -1.19377402004019 |
| C  | -6.492901212378987 | -0.94591862078664 | -0.51882124397272 |

|   |                   |                   |                   |
|---|-------------------|-------------------|-------------------|
| C | -7.46623760119512 | 0.37296094137172  | -0.57149376481390 |
| C | -5.49849329292025 | -0.53604619035077 | 0.43126427934463  |
| C | -5.32413845424673 | 0.84668274765039  | -1.50717488964131 |
| C | -6.69868619319745 | 0.99814171243365  | -1.53910906659723 |
| C | -6.87537144615097 | -0.40323474925105 | 0.41109310929558  |
| H | -5.04776881745697 | -1.16196328683895 | 1.18812111762617  |
| H | -4.74972494916484 | 1.33893910060405  | -2.27578484098562 |
| H | -7.16273022981995 | 1.59474167107398  | -2.31069236686122 |
| H | -7.47987234547330 | -0.91166509025731 | 1.14828737266801  |
| N | -8.91607282404511 | 0.53459325820549  | -0.58788555104103 |
| O | -9.54313031350473 | 0.02229208512141  | 0.30687873104429  |
| O | -9.39550646200945 | 1.17583879891254  | -1.49018593822112 |

## References

- [1] Depraetere, S.; Smet, M.; Dehaen, W., N-confused calix[4]pyrroles. *Angew. Chem. Int. Edit.* **1999**, *38* (22), 3359-3361.
- [2] Neese, F., The ORCA program system. *Wires. Comput. Mol. Sci.* **2012**, *2* (1), 73-78.
- [3] Eichkorn, K.; Treutler, O.; Ohm, H.; Haser, M.; Ahlrichs, R., Auxiliary Basis-Sets to Approximate Coulomb Potentials (Vol 240, Pg 283, 1995). *Chem. Phys. Lett.* **1995**, *242* (6), 652-660.
- [4] Eichkorn, K.; Weigend, F.; Treutler, O.; Ahlrichs, R., Auxiliary basis sets for main row atoms and transition metals and their use to approximate Coulomb potentials. *Theor. Chem. Acc.* **1997**, *97* (1-4), 119-124.
- [5] Grimme, S.; Brandenburg, J. G.; Bannwarth, C.; Hansen, A., Consistent structures and interactions by density functional theory with small atomic orbital basis sets. *J. Chem. Phys.* **2015**, *143* (5), 054107.
- [6] Zhao, Y.; Truhlar, D. G., Design of density functionals that are broadly accurate for thermochemistry, thermochemical kinetics, and nonbonded interactions. *J. Phys. Chem. A* **2005**, *109* (25), 5656-5667.
- [7] Grimme, S.; Antony, J.; Ehrlich, S.; Krieg, H., A consistent and accurate ab initio parametrization of density functional dispersion correction (DFT-D) for the 94 elements H-Pu. *J. Chem. Phys.* **2010**, *132* (15).
- [8] Grimme, S.; Ehrlich, S.; Goerigk, L., Effect of the Damping Function in Dispersion Corrected Density Functional Theory. *J. Comput. Chem.* **2011**, *32* (7), 1456-1465.
- [9] Johnson, E. R.; Becke, A. D., A post-Hartree-Fock model of intermolecular interactions. *J. Chem. Phys.* **2005**, *123* (2).
- [10] Becke, A. D.; Johnson, E. R., Exchange-hole dipole moment and the dispersion interaction. *J. Chem. Phys.* **2005**, *122* (15).
- [11] Schafer, A.; Huber, C.; Ahlrichs, R., Fully Optimized Contracted Gaussian-Basis Sets of Triple Zeta Valence Quality for Atoms Li to Kr. *J. Chem. Phys.* **1994**, *100* (8), 5829-5835.
- [12] Grimme, S., Supramolecular Binding Thermodynamics by Dispersion-Corrected Density Functional Theory. *Chem-Eur. J.* **2012**, *18* (32), 9955-9964.
- [13] Baerends, E. J.; Ziegler, T.; Atkins, A. J.; Autschbach, J.; Bashford, D.; Basergio, O.; Brces, A.; Bickelhaupt, F. M.; Bo, C.; Boerrigter, P. M.; Cavallo, L.; Daul, C.; Chong, D. P.; Chulhai, D. V.; Deng, L.; Dickson, R. M.; Dieterich, J. M.; Ellis, D. E.; van Faassen, M.; Ghysels, A.; Giammona, A.; van Gisbergen, S. J. A.; Goetz, A.; Gtz, A. W.; Gusarov, S.; Harris, F. E.; van den Hoek, P.; Hu, Z.; Jacob, C. R.; Jacobsen, H.; Jensen, L.; Joubert, L.; Kaminski, J. W.; van Kessel, G.; Knig, C.; Kootstra, F.; Kovalenko, A.; Krykunov, M.; van Lenthe, E.; McCormack, D. A.; Michalak, A.; Mitoraj, M.; Morton, S. M.; Neugebauer, J.; Nicu, V. P.; Noodleman, L.; Osinga, V. P.; Patchkovskii, S.; Pavanello, M.; Peeples, C. A.; Philipsen, P. H. T.; Post, D.; Pye, C. C.; Ramanantoanina, H.; Ramos, P.; Ravenek, W.; Rodriguez, J. I.; Ros, P.; Rger, R.; Schipper, P. R. T.; Schlins, D.; van Schoot, H.; Schreckenbach, G.; Seldenthuis, J. S.; Seth, M.; Snijders, J. G.; Sol, ADF2017, SCM, Theoretical Chemistry, Vrije Universiteit, Amsterdam, The Netherlands, <https://www.scm.com>.
- [14] a) DENZO-SMN, Z. Otwinowski & W. Minor, Processing of X-ray Diffraction Data Collected in Oscillation Mode, Methods Enzymol. (1997), 276, Eds C. W. Carter, R. M. Sweet, Academic Press.; b) SAINT, Bruker AXS GmbH, Karlsruhe, Germany **2016**.
- [15] a) G. M. Sheldrick, SADABS, Bruker AXS GmbH, Karlsruhe, Germany **2004-2014**; b) L. Krause, R. Herbst-Irmer, G. M. Sheldrick, D. Stalke, J. Appl. Cryst. **2015**, *48*, 3.
- [16] a) G. M. Sheldrick, SHELXT, Program for Crystal Structure Solution, University of Göttingen, Germany **2014-2018**; b) G. M. Sheldrick, Acta Cryst. **2015**, *A71*, 3.
- [17] a) G. M. Sheldrick, SHELXL-20xx, University of Göttingen and Bruker AXS GmbH, Karlsruhe, Germany **2012-2018**; b) W. Robinson, G. M. Sheldrick in: N. W. Isaacs, M. R. Taylor (eds.) „Crystallographic Computing 4“, Ch. 22, IUCr and Oxford University Press, Oxford, UK, **1988**; c) G. M. Sheldrick, Acta Cryst. **2008**, *A64*, 112; (d) G. M. Sheldrick, Acta Cryst. **2015**, *C71*, 3.
- [18] O. V. Dolomanov, L. J. Bourhis, R. J. Gildea, J. A. K. Howard, H. Puschmann, OLEX2: A complete structure solution, refinement and analysis program, J. Appl. Cryst. **2009**, *42*, 339.
- [19] a) P. v. d. Sluis, A. L. Spek, Acta Cryst. **1990**, *A46*, 194; b) A. L. Spek, Acta Cryst. **2015**, *C71*, 9.
- 20 a) A. L. Spek, PLATON, Utrecht University, The Netherlands; b) A. L. Spek, J. Appl. Cryst. **2003**, *36*, 7.
